# Supplementary material for: GeneFriends: An online co-expression analysis tool to identify novel gene targets for aging and complex diseases
Source: BMC Genomics. 2012 Oct 6;13:535. doi: 10.1186/1471-2164-13-535 (PMC3495651; doi:10.1186/1471-2164-13-535)
Supplement: Additional file 8 — Top 5% co-expressed genes with poorly annotated genes. [file 1471-2164-13-535-S8.xls]

## Sheet: 0610006I08RIK
Annotation Cluster 1	Enrichment Score: 32.75082299588745
Category	Term	Count	%	PValue	Genes	List Total	Pop Hits	Pop Total	Fold Enrichment	Bonferroni	Benjamini	FDR
GOTERM_CC_FAT	GO:0005739~mitochondrion	199	19.5481	8.10655e-44	1425755_AT, 1448104_AT, 1417590_AT, 1449283_A_AT, 1418716_AT, 1417273_AT, 1424562_A_AT, 1460194_AT, 1433878_AT, 1439151_AT, 1416183_A_AT, 1434542_AT, 1418862_AT, 1416225_AT, 1424242_AT, 1428326_S_AT, 1438391_X_AT, 1421014_A_AT, 1452076_AT, 1433545_S_AT, 1417053_AT, 1416948_AT, 1428619_AT, 1416772_AT, 1456204_AT, 1428145_AT, 1417203_AT, 1424912_AT, 1427126_AT, 1423492_AT, 1427153_AT, 1451511_AT, 1…	681	1322	12504	2.76391	3.02374e-41	3.02374e-41	1.1192e-40
SP_PIR_KEYWORDS	mitochondrion	136	13.3595	4.57196e-37	1415681_AT, 1438477_A_AT, 1434354_AT, 1429213_AT, 1448104_AT, 1425755_AT, 1417590_AT, 1449283_A_AT, 1418716_AT, 1419499_AT, 1417273_AT, 1448699_AT, 1424562_A_AT, 1425189_A_AT, 1422451_AT, 1433878_AT, 1416849_AT, 1439151_AT, 1435017_AT, 1460644_AT, 1417403_AT, 1418509_AT, 1417316_AT, 1432164_A_AT, 1422470_AT, 1453651_A_AT, 1418862_AT, 1429453_A_AT, 1424364_A_AT, 1428613_AT, 1416617_AT, 1438391_X_A…	911	790	17854	3.37387	2.0711e-34	2.0711e-34	6.49238e-34
SP_PIR_KEYWORDS	transit peptide	90	8.84086	9.92141e-29	1415681_AT, 1438477_A_AT, 1423780_AT, 1428302_AT, 1429213_AT, 1422819_AT, 1448373_AT, 1448104_AT, 1417590_AT, 1419499_AT, 1417273_AT, 1448699_AT, 1460194_AT, 1448491_AT, 1425189_A_AT, 1433878_AT, 1426959_AT, 1439151_AT, 1435017_AT, 1460644_AT, 1449000_AT, 1427282_A_AT, 1432164_A_AT, 1418862_AT, 1429453_A_AT, 1450969_AT, 1428613_AT, 1416647_AT, 1455972_X_AT, 1416617_AT, 1421014_A_AT, 1424392_AT, 1…	911	457	17854	3.85961	4.4944e-26	2.2472e-26	1.40888e-25
UP_SEQ_FEATURE	transit peptide:Mitochondrion	87	8.54617	2.69896e-24	1415681_AT, 1438477_A_AT, 1423780_AT, 1428302_AT, 1429213_AT, 1422819_AT, 1448373_AT, 1448104_AT, 1417590_AT, 1419499_AT, 1417273_AT, 1448699_AT, 1448491_AT, 1425189_A_AT, 1433878_AT, 1426959_AT, 1439151_AT, 1435017_AT, 1460644_AT, 1449000_AT, 1427282_A_AT, 1432164_A_AT, 1418862_AT, 1429453_A_AT, 1450969_AT, 1428613_AT, 1416647_AT, 1455972_X_AT, 1416617_AT, 1421014_A_AT, 1424392_AT, 1417629_AT, 1…	905	449	16021	3.43016	5.75688e-21	5.75688e-21	4.67526e-21
Annotation Cluster 2	Enrichment Score: 10.817322641701612
Category	Term	Count	%	PValue	Genes	List Total	Pop Hits	Pop Total	Fold Enrichment	Bonferroni	Benjamini	FDR
GOTERM_CC_FAT	GO:0044429~mitochondrial part	90	8.84086	8.89091e-23	1415681_AT, 1434354_AT, 1422819_AT, 1451541_AT, 1417590_AT, 1418716_AT, 1419499_AT, 1417273_AT, 1424562_A_AT, 1419547_AT, 1423717_AT, 1425189_A_AT, 1422451_AT, 1426959_AT, 1455614_AT, 1424316_AT, 1416849_AT, 1460644_AT, 1418509_AT, 1455506_AT, 1422470_AT, 1453651_A_AT, 1429453_A_AT, 1450969_AT, 1424364_A_AT, 1416647_AT, 1455972_X_AT, 1438391_X_AT, 1416617_AT, 1417053_AT, 1417629_AT, 1435548_AT, 1…	681	524	12504	3.15365	3.31631e-20	1.65815e-20	1.22749e-19
GOTERM_CC_FAT	GO:0005743~mitochondrial inner membrane	54	5.30452	8.56546e-15	1434354_AT, 1451541_AT, 1417590_AT, 1419499_AT, 1417273_AT, 1424562_A_AT, 1419547_AT, 1422451_AT, 1426959_AT, 1424316_AT, 1455506_AT, 1453651_A_AT, 1424364_A_AT, 1455972_X_AT, 1438391_X_AT, 1417053_AT, 1417629_AT, 1435548_AT, 1416772_AT, 1428145_AT, 1416567_S_AT, 1416494_AT, 1424912_AT, 1448292_AT, 1424182_AT, 1423492_AT, 1427153_AT, 1448507_AT, 1418013_AT, 1450866_A_AT, 1416679_AT, 1416020_A_AT,…	681	296	12504	3.34968	3.18867e-12	7.9714e-13	1.18017e-11
GOTERM_CC_FAT	GO:0019866~organelle inner membrane	54	5.30452	8.03212e-14	1434354_AT, 1451541_AT, 1417590_AT, 1419499_AT, 1417273_AT, 1424562_A_AT, 1419547_AT, 1422451_AT, 1426959_AT, 1424316_AT, 1455506_AT, 1453651_A_AT, 1424364_A_AT, 1455972_X_AT, 1438391_X_AT, 1417053_AT, 1417629_AT, 1435548_AT, 1416772_AT, 1428145_AT, 1416567_S_AT, 1416494_AT, 1424912_AT, 1448292_AT, 1424182_AT, 1423492_AT, 1427153_AT, 1448507_AT, 1418013_AT, 1450866_A_AT, 1416679_AT, 1416020_A_AT,…	681	312	12504	3.17791	2.99404e-11	5.9881e-12	1.10822e-10
GOTERM_CC_FAT	GO:0005740~mitochondrial envelope	61	5.99214	1.83615e-13	1434354_AT, 1451541_AT, 1417590_AT, 1419499_AT, 1417273_AT, 1424562_A_AT, 1419547_AT, 1422451_AT, 1426959_AT, 1455614_AT, 1424316_AT, 1416849_AT, 1455506_AT, 1453651_A_AT, 1422470_AT, 1424364_A_AT, 1455972_X_AT, 1438391_X_AT, 1417053_AT, 1417629_AT, 1435548_AT, 1416772_AT, 1428145_AT, 1416567_S_AT, 1416494_AT, 1424912_AT, 1448292_AT, 1424182_AT, 1428915_AT, 1423492_AT, 1427153_AT, 1418013_AT, 144…	681	391	12504	2.86454	6.84943e-11	1.14158e-11	2.53519e-10
GOTERM_CC_FAT	GO:0031966~mitochondrial membrane	58	5.69745	5.13002e-13	1434354_AT, 1451541_AT, 1417590_AT, 1419499_AT, 1417273_AT, 1424562_A_AT, 1419547_AT, 1422451_AT, 1426959_AT, 1424316_AT, 1455614_AT, 1416849_AT, 1455506_AT, 1453651_A_AT, 1422470_AT, 1424364_A_AT, 1455972_X_AT, 1438391_X_AT, 1417053_AT, 1417629_AT, 1435548_AT, 1416772_AT, 1428145_AT, 1416567_S_AT, 1416494_AT, 1424912_AT, 1448292_AT, 1424182_AT, 1423492_AT, 1427153_AT, 1418013_AT, 1448507_AT, 145…	681	368	12504	2.89389	1.91362e-10	2.73374e-11	7.083e-10
GOTERM_CC_FAT	GO:0031967~organelle envelope	61	5.99214	8.78955e-08	1434354_AT, 1451541_AT, 1417590_AT, 1419499_AT, 1417273_AT, 1424562_A_AT, 1419547_AT, 1422451_AT, 1426959_AT, 1455614_AT, 1424316_AT, 1416849_AT, 1455506_AT, 1453651_A_AT, 1422470_AT, 1424364_A_AT, 1455972_X_AT, 1438391_X_AT, 1417053_AT, 1417629_AT, 1435548_AT, 1416772_AT, 1428145_AT, 1416567_S_AT, 1416494_AT, 1424912_AT, 1448292_AT, 1424182_AT, 1428915_AT, 1423492_AT, 1427153_AT, 1418013_AT, 144…	681	540	12504	2.07414	3.27845e-05	3.2785e-06	0.00012135
GOTERM_CC_FAT	GO:0031975~envelope	61	5.99214	9.97506e-08	1434354_AT, 1451541_AT, 1417590_AT, 1419499_AT, 1417273_AT, 1424562_A_AT, 1419547_AT, 1422451_AT, 1426959_AT, 1455614_AT, 1424316_AT, 1416849_AT, 1455506_AT, 1453651_A_AT, 1422470_AT, 1424364_A_AT, 1455972_X_AT, 1438391_X_AT, 1417053_AT, 1417629_AT, 1435548_AT, 1416772_AT, 1428145_AT, 1416567_S_AT, 1416494_AT, 1424912_AT, 1448292_AT, 1424182_AT, 1428915_AT, 1423492_AT, 1427153_AT, 1418013_AT, 144…	681	542	12504	2.06649	3.72063e-05	3.38245e-06	0.000137717
GOTERM_CC_FAT	GO:0031090~organelle membrane	78	7.66208	8.05885e-07	1434354_AT, 1451541_AT, 1417590_AT, 1419499_AT, 1417273_AT, 1424562_A_AT, 1419547_AT, 1422451_AT, 1426959_AT, 1455614_AT, 1424316_AT, 1416849_AT, 1417403_AT, 1455506_AT, 1438566_AT, 1453651_A_AT, 1422470_AT, 1422780_AT, 1424364_A_AT, 1455972_X_AT, 1452398_AT, 1418455_AT, 1438391_X_AT, 1420958_AT, 1417053_AT, 1417629_AT, 1435548_AT, 1416772_AT, 1428145_AT, 1416567_S_AT, 1416494_AT, 1424912_AT, 144…	681	809	12504	1.7703	0.00030055	2.31224e-05	0.00111261
SP_PIR_KEYWORDS	mitochondrion inner membrane	21	2.06287	0.00108239	1427483_AT, 1416494_AT, 1451541_AT, 1448292_AT, 1416285_AT, 1424364_A_AT, 1428440_AT, 1420387_AT, 1424562_A_AT, 1417053_AT, 1449218_AT, 1424316_AT, 1435548_AT, 1423108_AT, 1448427_AT, 1460718_S_AT, 1455506_AT, 1416772_AT, 1418709_AT, 1416567_S_AT, 1426586_AT	911	183	17854	2.24898	0.387735	0.0370345	1.52611
Annotation Cluster 3	Enrichment Score: 6.556398369696674
Category	Term	Count	%	PValue	Genes	List Total	Pop Hits	Pop Total	Fold Enrichment	Bonferroni	Benjamini	FDR
SP_PIR_KEYWORDS	peroxisome	22	2.1611	1.16583e-08	1424912_AT, 1422780_AT, 1449047_AT, 1418052_AT, 1417841_AT, 1453139_AT, 1448499_A_AT, 1460194_AT, 1430896_S_AT, 1448491_AT, 1451277_AT, 1426856_AT, 1433545_S_AT, 1448382_AT, 1439096_AT, 1416679_AT, 1419974_AT, 1449964_A_AT, 1416429_A_AT, 1432332_A_AT, 1431012_A_AT, 1416408_AT	911	96	17854	4.49126	5.28119e-06	1.05624e-06	1.65553e-05
GOTERM_CC_FAT	GO:0005777~peroxisome	22	2.1611	1.46156e-07	1424912_AT, 1422780_AT, 1449047_AT, 1418052_AT, 1417841_AT, 1453139_AT, 1448499_A_AT, 1420387_AT, 1460194_AT, 1430896_S_AT, 1448491_AT, 1451277_AT, 1433545_S_AT, 1448382_AT, 1439096_AT, 1416679_AT, 1419974_AT, 1449964_A_AT, 1416429_A_AT, 1432332_A_AT, 1431012_A_AT, 1416408_AT	681	104	12504	3.88411	5.45146e-05	4.543e-06	0.000201785
GOTERM_CC_FAT	GO:0042579~microbody	22	2.1611	1.46156e-07	1424912_AT, 1422780_AT, 1449047_AT, 1418052_AT, 1417841_AT, 1453139_AT, 1448499_A_AT, 1420387_AT, 1460194_AT, 1430896_S_AT, 1448491_AT, 1451277_AT, 1433545_S_AT, 1448382_AT, 1439096_AT, 1416679_AT, 1419974_AT, 1449964_A_AT, 1416429_A_AT, 1432332_A_AT, 1431012_A_AT, 1416408_AT	681	104	12504	3.88411	5.45146e-05	4.543e-06	0.000201785
UP_SEQ_FEATURE	short sequence motif:Microbody targeting signal	12	1.17878	2.38858e-05	1439096_AT, 1449047_AT, 1419974_AT, 1453139_AT, 1448499_A_AT, 1449964_A_AT, 1432332_A_AT, 1430896_S_AT, 1431012_A_AT, 1448491_AT, 1448382_AT, 1416408_AT	905	44	16021	4.82803	0.0496729	0.0126565	0.041368
Annotation Cluster 4	Enrichment Score: 6.22205249314275
Category	Term	Count	%	PValue	Genes	List Total	Pop Hits	Pop Total	Fold Enrichment	Bonferroni	Benjamini	FDR
GOTERM_CC_FAT	GO:0031980~mitochondrial lumen	42	4.12574	4.24883e-17	1415681_AT, 1427126_AT, 1422819_AT, 1443915_AT, 1428915_AT, 1418716_AT, 1427153_AT, 1417273_AT, 1455446_X_AT, 1423717_AT, 1425189_A_AT, 1416349_AT, 1426959_AT, 1460644_AT, 1418509_AT, 1450866_A_AT, 1423242_AT, 1417193_AT, 1449118_AT, 1429453_A_AT, 1452048_AT, 1450969_AT, 1416647_AT, 1424372_AT, 1455972_X_AT, 1416383_A_AT, 1428153_AT, 1448609_AT, 1416617_AT, 1452823_AT, 1448825_AT, 1452341_AT, 144…	681	163	12504	4.73112	1.58481e-14	5.28271e-15	5.86599e-14
GOTERM_CC_FAT	GO:0005759~mitochondrial matrix	42	4.12574	4.24883e-17	1415681_AT, 1427126_AT, 1422819_AT, 1443915_AT, 1428915_AT, 1418716_AT, 1427153_AT, 1417273_AT, 1455446_X_AT, 1423717_AT, 1425189_A_AT, 1416349_AT, 1426959_AT, 1460644_AT, 1418509_AT, 1450866_A_AT, 1423242_AT, 1417193_AT, 1449118_AT, 1429453_A_AT, 1452048_AT, 1450969_AT, 1416647_AT, 1424372_AT, 1455972_X_AT, 1416383_A_AT, 1428153_AT, 1448609_AT, 1416617_AT, 1452823_AT, 1448825_AT, 1452341_AT, 144…	681	163	12504	4.73112	1.58481e-14	5.28271e-15	5.86599e-14
GOTERM_CC_FAT	GO:0070013~intracellular organelle lumen	78	7.66208	0.0231079	1415681_AT, 1421902_AT, 1422819_AT, 1436867_AT, 1418716_AT, 1417273_AT, 1431885_A_AT, 1423717_AT, 1425189_A_AT, 1426018_A_AT, 1426959_AT, 1417661_AT, 1460644_AT, 1418509_AT, 1416826_A_AT, 1416803_AT, 1422470_AT, 1415923_AT, 1429453_A_AT, 1450969_AT, 1416647_AT, 1426725_S_AT, 1424382_AT, 1455972_X_AT, 1416617_AT, 1417629_AT, 1452388_AT, 1425560_A_AT, 1416967_AT, 1425806_A_AT, 1416948_AT, 1447577_X…	681	1133	12504	1.26406	0.999837	0.252245	27.5863
GOTERM_CC_FAT	GO:0043233~organelle lumen	78	7.66208	0.0240786	1415681_AT, 1421902_AT, 1422819_AT, 1436867_AT, 1418716_AT, 1417273_AT, 1431885_A_AT, 1423717_AT, 1425189_A_AT, 1426018_A_AT, 1426959_AT, 1417661_AT, 1460644_AT, 1418509_AT, 1416826_A_AT, 1416803_AT, 1422470_AT, 1415923_AT, 1429453_A_AT, 1450969_AT, 1416647_AT, 1426725_S_AT, 1424382_AT, 1455972_X_AT, 1416617_AT, 1417629_AT, 1452388_AT, 1425560_A_AT, 1416967_AT, 1425806_A_AT, 1416948_AT, 1447577_X…	681	1136	12504	1.26072	0.999887	0.254176	28.5735
GOTERM_CC_FAT	GO:0031974~membrane-enclosed lumen	78	7.66208	0.0463503	1415681_AT, 1421902_AT, 1422819_AT, 1436867_AT, 1418716_AT, 1417273_AT, 1431885_A_AT, 1423717_AT, 1425189_A_AT, 1426018_A_AT, 1426959_AT, 1417661_AT, 1460644_AT, 1418509_AT, 1416826_A_AT, 1416803_AT, 1422470_AT, 1415923_AT, 1429453_A_AT, 1450969_AT, 1416647_AT, 1426725_S_AT, 1424382_AT, 1455972_X_AT, 1416617_AT, 1417629_AT, 1452388_AT, 1425560_A_AT, 1416967_AT, 1425806_A_AT, 1416948_AT, 1447577_X…	681	1174	12504	1.21991	1	0.357606	48.0674
GOTERM_CC_FAT	GO:0031981~nuclear lumen	30	2.94695	0.999315	1434277_A_AT, 1426743_AT, 1421902_AT, 1418982_AT, 1443260_AT, 1431885_A_AT, 1421528_A_AT, 1426018_A_AT, 1417661_AT, 1416826_A_AT, 1422470_AT, 1423389_AT, 1417728_AT, 1437914_AT, 1427040_AT, 1415923_AT, 1426725_S_AT, 1417817_A_AT, 1417387_AT, 1435436_AT, 1448740_AT, 1428083_AT, 1418136_AT, 1416967_AT, 1425560_A_AT, 1425806_A_AT, 1455288_AT, 1434960_AT, 1438936_S_AT, 1428296_AT	681	883	12504	0.623824	1	1	100
Annotation Cluster 5	Enrichment Score: 5.0829031952819035
Category	Term	Count	%	PValue	Genes	List Total	Pop Hits	Pop Total	Fold Enrichment	Bonferroni	Benjamini	FDR
GOTERM_MF_FAT	GO:0030247~polysaccharide binding	24	2.35756	5.43549e-08	1424186_AT, 1423136_AT, 1416953_AT, 1427053_AT, 1423606_AT, 1432466_A_AT, 1416221_AT, 1416666_AT, 1425620_AT, 1440339_AT, 1428853_AT, 1422912_AT, 1434758_AT, 1425896_A_AT, 1449368_AT, 1450716_AT, 1416006_AT, 1417109_AT, 1423153_X_AT, 1429083_AT, 1451803_A_AT, 1415894_AT, 1451527_AT, 1438936_S_AT	652	128	13288	3.82132	4.43527e-05	4.43527e-05	8.36521e-05
GOTERM_MF_FAT	GO:0001871~pattern binding	24	2.35756	5.43549e-08	1424186_AT, 1423136_AT, 1416953_AT, 1427053_AT, 1423606_AT, 1432466_A_AT, 1416221_AT, 1416666_AT, 1425620_AT, 1440339_AT, 1428853_AT, 1422912_AT, 1434758_AT, 1425896_A_AT, 1449368_AT, 1450716_AT, 1416006_AT, 1417109_AT, 1423153_X_AT, 1429083_AT, 1451803_A_AT, 1415894_AT, 1451527_AT, 1438936_S_AT	652	128	13288	3.82132	4.43527e-05	4.43527e-05	8.36521e-05
GOTERM_MF_FAT	GO:0008201~heparin binding	17	1.66994	2.20337e-06	1424186_AT, 1423136_AT, 1427053_AT, 1416953_AT, 1423606_AT, 1416221_AT, 1432466_A_AT, 1416666_AT, 1428853_AT, 1422912_AT, 1434758_AT, 1450716_AT, 1416006_AT, 1423153_X_AT, 1451803_A_AT, 1451527_AT, 1438936_S_AT	652	83	13288	4.17429	0.00179634	0.000449388	0.00339093
GOTERM_MF_FAT	GO:0005539~glycosaminoglycan binding	19	1.8664	1.01529e-05	1424186_AT, 1423136_AT, 1427053_AT, 1416953_AT, 1423606_AT, 1432466_A_AT, 1416221_AT, 1416666_AT, 1425620_AT, 1428853_AT, 1422912_AT, 1434758_AT, 1449368_AT, 1450716_AT, 1416006_AT, 1423153_X_AT, 1451803_A_AT, 1451527_AT, 1438936_S_AT	652	114	13288	3.39673	0.00825059	0.00165559	0.0156241
SP_PIR_KEYWORDS	heparin-binding	10	0.982318	0.00130836	1450716_AT, 1423136_AT, 1416006_AT, 1416953_AT, 1423606_AT, 1416221_AT, 1432466_A_AT, 1451803_A_AT, 1416666_AT, 1451527_AT	911	53	17854	3.69778	0.447375	0.0387669	1.84197
GOTERM_MF_FAT	GO:0030246~carbohydrate binding	28	2.75049	0.00367872	1424186_AT, 1423136_AT, 1427053_AT, 1416953_AT, 1432466_A_AT, 1416221_AT, 1434758_AT, 1425582_A_AT, 1452626_A_AT, 1417109_AT, 1423153_X_AT, 1429083_AT, 1415894_AT, 1451527_AT, 1423606_AT, 1416666_AT, 1425620_AT, 1440339_AT, 1428853_AT, 1422912_AT, 1425896_A_AT, 1449368_AT, 1416034_AT, 1450716_AT, 1424318_AT, 1416006_AT, 1451803_A_AT, 1438936_S_AT	652	317	13288	1.80016	0.950579	0.127767	5.51412
Annotation Cluster 6	Enrichment Score: 4.648384547923906
Category	Term	Count	%	PValue	Genes	List Total	Pop Hits	Pop Total	Fold Enrichment	Bonferroni	Benjamini	FDR
KEGG_PATHWAY	mmu00071:Fatty acid metabolism	14	1.37525	1.61142e-07	1424182_AT, 1416225_AT, 1455972_X_AT, 1455446_X_AT, 1452341_AT, 1448717_AT, 1448382_AT, 1418321_AT, 1415984_AT, 1416772_AT, 1431012_A_AT, 1428145_AT, 1428296_AT, 1416408_AT	288	45	5738	6.19846	2.57823e-05	8.59418e-06	0.000194576
GOTERM_BP_FAT	GO:0006631~fatty acid metabolic process	28	2.75049	1.73344e-07	1429735_AT, 1449047_AT, 1453065_AT, 1419499_AT, 1448499_A_AT, 1455446_X_AT, 1460194_AT, 1434191_AT, 1448491_AT, 1417962_S_AT, 1417403_AT, 1454987_A_AT, 1416408_AT, 1455972_X_AT, 1452341_AT, 1419905_S_AT, 1419039_AT, 1415964_AT, 1448382_AT, 1429463_AT, 1423828_AT, 1418321_AT, 1416772_AT, 1415984_AT, 1449964_A_AT, 1430640_A_AT, 1428145_AT, 1428296_AT	648	184	13588	3.19096	0.000422869	0.000211457	0.000304951
SP_PIR_KEYWORDS	fatty acid metabolism	11	1.08055	0.000952184	1455972_X_AT, 1418321_AT, 1455446_X_AT, 1415984_AT, 1452341_AT, 1416772_AT, 1419905_S_AT, 1448491_AT, 1428145_AT, 1448382_AT, 1416408_AT	911	61	17854	3.53411	0.350495	0.0353231	1.34368
SP_PIR_KEYWORDS	lipid metabolism	15	1.47348	0.00958574	1418780_AT, 1455972_X_AT, 1452341_AT, 1455446_X_AT, 1449038_AT, 1448491_AT, 1419905_S_AT, 1448382_AT, 1426690_A_AT, 1418321_AT, 1415984_AT, 1416772_AT, 1417900_A_AT, 1428145_AT, 1416408_AT	911	136	17854	2.16157	0.987264	0.139686	12.7836
Annotation Cluster 7	Enrichment Score: 4.602488532583785
Category	Term	Count	%	PValue	Genes	List Total	Pop Hits	Pop Total	Fold Enrichment	Bonferroni	Benjamini	FDR
SP_PIR_KEYWORDS	ribosomal protein	32	3.14342	1.47676e-09	1415681_AT, 1428302_AT, 1416284_AT, 1422819_AT, 1448373_AT, 1443915_AT, 1423492_AT, 1418716_AT, 1448699_AT, 1448799_S_AT, 1452585_AT, 1425189_A_AT, 1416349_AT, 1422451_AT, 1433878_AT, 1450866_A_AT, 1421971_A_AT, 1423242_AT, 1429453_A_AT, 1452048_AT, 1424372_AT, 1428153_AT, 1423218_A_AT, 1445464_AT, 1418439_AT, 1453725_A_AT, 1438563_S_AT, 1416948_AT, 1452730_AT, 1430100_AT, 1448869_A_AT, 1424440_AT	911	177	17854	3.54319	6.68973e-07	1.67243e-07	2.09707e-06
GOTERM_CC_FAT	GO:0000313~organellar ribosome	15	1.47348	1.55204e-08	1415681_AT, 1422819_AT, 1452048_AT, 1443915_AT, 1429453_A_AT, 1424372_AT, 1418716_AT, 1428153_AT, 1416349_AT, 1425189_A_AT, 1453725_A_AT, 1450866_A_AT, 1438563_S_AT, 1416948_AT, 1423242_AT	681	41	12504	6.71752	5.7891e-06	7.23639e-07	2.14277e-05
GOTERM_CC_FAT	GO:0005761~mitochondrial ribosome	15	1.47348	1.55204e-08	1415681_AT, 1422819_AT, 1452048_AT, 1443915_AT, 1429453_A_AT, 1424372_AT, 1418716_AT, 1428153_AT, 1416349_AT, 1425189_A_AT, 1453725_A_AT, 1450866_A_AT, 1438563_S_AT, 1416948_AT, 1423242_AT	681	41	12504	6.71752	5.7891e-06	7.23639e-07	2.14277e-05
GOTERM_CC_FAT	GO:0005840~ribosome	32	3.14342	4.44664e-08	1415681_AT, 1428302_AT, 1416284_AT, 1422819_AT, 1448373_AT, 1443915_AT, 1423492_AT, 1418716_AT, 1448699_AT, 1448799_S_AT, 1452585_AT, 1425189_A_AT, 1416349_AT, 1422451_AT, 1433878_AT, 1450866_A_AT, 1421971_A_AT, 1423242_AT, 1429453_A_AT, 1452048_AT, 1424372_AT, 1428153_AT, 1423218_A_AT, 1445464_AT, 1418439_AT, 1453725_A_AT, 1438563_S_AT, 1416948_AT, 1452730_AT, 1430100_AT, 1448869_A_AT, 1424440_AT	681	192	12504	3.06021	1.65858e-05	1.84288e-06	6.1391e-05
SP_PIR_KEYWORDS	ribonucleoprotein	37	3.63458	8.50455e-08	1415681_AT, 1428302_AT, 1416284_AT, 1422819_AT, 1448373_AT, 1443915_AT, 1423492_AT, 1418716_AT, 1448699_AT, 1448799_S_AT, 1452585_AT, 1425189_A_AT, 1416349_AT, 1422451_AT, 1433878_AT, 1450866_A_AT, 1428672_AT, 1421971_A_AT, 1423242_AT, 1429453_A_AT, 1452048_AT, 1424372_AT, 1428153_AT, 1423218_A_AT, 1445464_AT, 1418439_AT, 1453725_A_AT, 1416336_S_AT, 1419260_A_AT, 1433658_X_AT, 1417960_AT, 1421063…	911	266	17854	2.72607	3.85249e-05	6.42091e-06	0.000120768
GOTERM_MF_FAT	GO:0003735~structural constituent of ribosome	22	2.1611	1.4583e-05	1428302_AT, 1422819_AT, 1452048_AT, 1443915_AT, 1429453_A_AT, 1418716_AT, 1424372_AT, 1448799_S_AT, 1428153_AT, 1423218_A_AT, 1445464_AT, 1416349_AT, 1425189_A_AT, 1422451_AT, 1453725_A_AT, 1450866_A_AT, 1438563_S_AT, 1416948_AT, 1452730_AT, 1430100_AT, 1448869_A_AT, 1424440_AT	652	151	13288	2.96933	0.0118293	0.00198133	0.0224408
GOTERM_CC_FAT	GO:0005762~mitochondrial large ribosomal subunit	9	0.884086	1.73545e-05	1415681_AT, 1422819_AT, 1429453_A_AT, 1450866_A_AT, 1438563_S_AT, 1416948_AT, 1424372_AT, 1425189_A_AT, 1416349_AT	681	23	12504	7.18483	0.00645239	0.000462271	0.0239572
GOTERM_CC_FAT	GO:0000315~organellar large ribosomal subunit	9	0.884086	1.73545e-05	1415681_AT, 1422819_AT, 1429453_A_AT, 1450866_A_AT, 1438563_S_AT, 1416948_AT, 1424372_AT, 1425189_A_AT, 1416349_AT	681	23	12504	7.18483	0.00645239	0.000462271	0.0239572
GOTERM_CC_FAT	GO:0033279~ribosomal subunit	14	1.37525	4.57813e-05	1415681_AT, 1422819_AT, 1429453_A_AT, 1424372_AT, 1418716_AT, 1448799_S_AT, 1428153_AT, 1416349_AT, 1425189_A_AT, 1453725_A_AT, 1450866_A_AT, 1438563_S_AT, 1416948_AT, 1423242_AT	681	66	12504	3.89481	0.0169319	0.00113781	0.0631879
GOTERM_CC_FAT	GO:0015934~large ribosomal subunit	9	0.884086	0.00100571	1415681_AT, 1422819_AT, 1429453_A_AT, 1450866_A_AT, 1438563_S_AT, 1416948_AT, 1424372_AT, 1425189_A_AT, 1416349_AT	681	39	12504	4.23721	0.312929	0.0195597	1.37959
GOTERM_CC_FAT	GO:0030529~ribonucleoprotein complex	42	4.12574	0.00137002	1415681_AT, 1428302_AT, 1416284_AT, 1422819_AT, 1448373_AT, 1443915_AT, 1423492_AT, 1418716_AT, 1448699_AT, 1448799_S_AT, 1435520_AT, 1452585_AT, 1425189_A_AT, 1416349_AT, 1433878_AT, 1422451_AT, 1437972_S_AT, 1450866_A_AT, 1428672_AT, 1421971_A_AT, 1423242_AT, 1437152_AT, 1429453_A_AT, 1452048_AT, 1435153_AT, 1424372_AT, 1428153_AT, 1423218_A_AT, 1445464_AT, 1418439_AT, 1453725_A_AT, 1416336_S_A…	681	462	12504	1.6692	0.400325	0.0252442	1.87496
GOTERM_CC_FAT	GO:0000314~organellar small ribosomal subunit	5	0.491159	0.0013987	1453725_A_AT, 1438563_S_AT, 1418716_AT, 1428153_AT, 1423242_AT	681	10	12504	9.18062	0.406715	0.0245545	1.91387
GOTERM_CC_FAT	GO:0005763~mitochondrial small ribosomal subunit	5	0.491159	0.0013987	1453725_A_AT, 1438563_S_AT, 1418716_AT, 1428153_AT, 1423242_AT	681	10	12504	9.18062	0.406715	0.0245545	1.91387
GOTERM_CC_FAT	GO:0015935~small ribosomal subunit	6	0.589391	0.018781	1453725_A_AT, 1438563_S_AT, 1418716_AT, 1428153_AT, 1448799_S_AT, 1423242_AT	681	29	12504	3.79888	0.999151	0.223197	23.0303
GOTERM_BP_FAT	GO:0006412~translation	24	2.35756	0.0316434	1415681_AT, 1428302_AT, 1422819_AT, 1452048_AT, 1429453_A_AT, 1443915_AT, 1424372_AT, 1448799_S_AT, 1428153_AT, 1423218_A_AT, 1445464_AT, 1416349_AT, 1425189_A_AT, 1422451_AT, 1453725_A_AT, 1434738_AT, 1450866_A_AT, 1438563_S_AT, 1416948_AT, 1434071_A_AT, 1452730_AT, 1430100_AT, 1448869_A_AT, 1424440_AT	648	319	13588	1.57762	1	0.526318	43.2026
GOTERM_MF_FAT	GO:0005198~structural molecule activity	31	3.04519	0.0528902	1428302_AT, 1455610_AT, 1422819_AT, 1443915_AT, 1418716_AT, 1424092_AT, 1448371_AT, 1448799_S_AT, 1425189_A_AT, 1416349_AT, 1418551_AT, 1422451_AT, 1450866_A_AT, 1424280_AT, 1416455_A_AT, 1424367_A_AT, 1429453_A_AT, 1452048_AT, 1424372_AT, 1428153_AT, 1423218_A_AT, 1445464_AT, 1425896_A_AT, 1453725_A_AT, 1438563_S_AT, 1416948_AT, 1448755_AT, 1452730_AT, 1430100_AT, 1448869_A_AT, 1424440_AT	652	450	13288	1.40398	1	0.65207	56.6687
Annotation Cluster 8	Enrichment Score: 4.220483113865745
Category	Term	Count	%	PValue	Genes	List Total	Pop Hits	Pop Total	Fold Enrichment	Bonferroni	Benjamini	FDR
GOTERM_BP_FAT	GO:0001944~vasculature development	30	2.94695	8.43098e-06	1429735_AT, 1417271_A_AT, 1423136_AT, 1416953_AT, 1443260_AT, 1432466_A_AT, 1424842_A_AT, 1425582_A_AT, 1436739_AT, 1425895_A_AT, 1423389_AT, 1418571_AT, 1417574_AT, 1422528_A_AT, 1421441_AT, 1435436_AT, 1425620_AT, 1415800_AT, 1421027_A_AT, 1448649_AT, 1422912_AT, 1429514_AT, 1420696_AT, 1417500_A_AT, 1418157_AT, 1451803_A_AT, 1437745_AT, 1423135_AT, 1438936_S_AT, 1427048_AT	648	250	13588	2.5163	0.0203615	0.00228313	0.014831
GOTERM_BP_FAT	GO:0001568~blood vessel development	29	2.84872	1.47203e-05	1429735_AT, 1417271_A_AT, 1423136_AT, 1416953_AT, 1443260_AT, 1432466_A_AT, 1424842_A_AT, 1425582_A_AT, 1436739_AT, 1423389_AT, 1418571_AT, 1417574_AT, 1422528_A_AT, 1421441_AT, 1435436_AT, 1425620_AT, 1415800_AT, 1421027_A_AT, 1448649_AT, 1422912_AT, 1429514_AT, 1420696_AT, 1417500_A_AT, 1418157_AT, 1451803_A_AT, 1437745_AT, 1423135_AT, 1438936_S_AT, 1427048_AT	648	244	13588	2.49223	0.0352803	0.00298867	0.0258931
GOTERM_BP_FAT	GO:0048514~blood vessel morphogenesis	25	2.4558	2.41341e-05	1429735_AT, 1417271_A_AT, 1423136_AT, 1416953_AT, 1443260_AT, 1432466_A_AT, 1424842_A_AT, 1425582_A_AT, 1423389_AT, 1418571_AT, 1422528_A_AT, 1417574_AT, 1421441_AT, 1435436_AT, 1421027_A_AT, 1448649_AT, 1422912_AT, 1415800_AT, 1420696_AT, 1417500_A_AT, 1418157_AT, 1451803_A_AT, 1423135_AT, 1438936_S_AT, 1427048_AT	648	198	13588	2.64762	0.0571875	0.00419744	0.0424488
GOTERM_BP_FAT	GO:0001525~angiogenesis	15	1.47348	0.00438171	1417271_A_AT, 1423136_AT, 1417574_AT, 1416953_AT, 1421441_AT, 1443260_AT, 1435436_AT, 1448649_AT, 1422912_AT, 1424842_A_AT, 1425582_A_AT, 1451803_A_AT, 1423135_AT, 1438936_S_AT, 1418571_AT	648	133	13588	2.36494	0.999978	0.220563	7.4345
Annotation Cluster 9	Enrichment Score: 4.207215149544223
Category	Term	Count	%	PValue	Genes	List Total	Pop Hits	Pop Total	Fold Enrichment	Bonferroni	Benjamini	FDR
INTERPRO	IPR001753:Crotonase, core	8	0.785855	1.53681e-06	1420776_A_AT, 1418321_AT, 1452341_AT, 1451511_AT, 1431012_A_AT, 1448491_AT, 1448382_AT, 1418862_AT	860	14	17763	11.8027	0.0020388	0.0020388	0.00251581
INTERPRO	IPR018376:Enoyl-CoA hydratase/isomerase, conserved site	7	0.687623	2.23306e-06	1420776_A_AT, 1418321_AT, 1452341_AT, 1451511_AT, 1448491_AT, 1448382_AT, 1418862_AT	860	10	17763	14.4583	0.00296111	0.00148165	0.00365557
UP_SEQ_FEATURE	site:Important for catalytic activity	6	0.589391	0.000321038	1434354_AT, 1455972_X_AT, 1418321_AT, 1452341_AT, 1448491_AT, 1448382_AT	905	12	16021	8.85138	0.495851	0.0932066	0.554662
GOTERM_MF_FAT	GO:0004300~enoyl-CoA hydratase activity	3	0.294695	0.0134605	1420776_A_AT, 1452341_AT, 1448382_AT	652	4	13288	15.2853	0.999984	0.317044	18.8251
Annotation Cluster 10	Enrichment Score: 3.9614165015826894
Category	Term	Count	%	PValue	Genes	List Total	Pop Hits	Pop Total	Fold Enrichment	Bonferroni	Benjamini	FDR
INTERPRO	IPR016040:NAD(P)-binding domain	22	2.1611	1.24546e-05	1423780_AT, 1416204_AT, 1428636_AT, 1455972_X_AT, 1438391_X_AT, 1449038_AT, 1417772_AT, 1419905_S_AT, 1416632_AT, 1451277_AT, 1426856_AT, 1448382_AT, 1432372_A_AT, 1426959_AT, 1439096_AT, 1428695_AT, 1419367_AT, 1418509_AT, 1454987_A_AT, 1448390_A_AT, 1423828_AT, 1419456_AT	860	151	17763	3.00929	0.0164038	0.00549811	0.0203869
INTERPRO	IPR002198:Short-chain dehydrogenase/reductase SDR	13	1.27701	4.87155e-05	1449038_AT, 1438391_X_AT, 1419905_S_AT, 1426856_AT, 1432372_A_AT, 1426959_AT, 1419367_AT, 1418509_AT, 1454987_A_AT, 1419974_AT, 1448390_A_AT, 1423828_AT, 1419456_AT	860	64	17763	4.19548	0.0626474	0.0128558	0.07972
INTERPRO	IPR002347:Glucose/ribitol dehydrogenase	11	1.08055	0.000311951	1426959_AT, 1454987_A_AT, 1418509_AT, 1419367_AT, 1448390_A_AT, 1438391_X_AT, 1449038_AT, 1419456_AT, 1419905_S_AT, 1426856_AT, 1432372_A_AT	860	56	17763	4.05716	0.339221	0.0449936	0.509457
PIR_SUPERFAMILY	PIRSF000092:short-chain dehydrogenase	6	0.589391	0.00075379	1454987_A_AT, 1418509_AT, 1438391_X_AT, 1419456_AT, 1419905_S_AT, 1432372_A_AT	463	14	8136	7.53101	0.31669	0.31669	1.08153
Annotation Cluster 11	Enrichment Score: 3.836600107030378
Category	Term	Count	%	PValue	Genes	List Total	Pop Hits	Pop Total	Fold Enrichment	Bonferroni	Benjamini	FDR
GOTERM_MF_FAT	GO:0050662~coenzyme binding	27	2.65226	6.31562e-08	1423780_AT, 1449047_AT, 1428915_AT, 1422904_AT, 1428636_AT, 1455446_X_AT, 1416788_A_AT, 1432164_A_AT, 1455435_S_AT, 1416408_AT, 1416204_AT, 1415993_AT, 1449118_AT, 1428613_AT, 1455972_X_AT, 1417429_AT, 1416632_AT, 1419905_S_AT, 1417772_AT, 1448717_AT, 1433545_S_AT, 1448382_AT, 1450048_A_AT, 1449626_S_AT, 1428695_AT, 1415984_AT, 1431012_A_AT	652	160	13288	3.43919	5.15341e-05	1.71783e-05	9.71971e-05
SP_PIR_KEYWORDS	Flavoprotein	16	1.57171	0.00022177	1415993_AT, 1434354_AT, 1428613_AT, 1422904_AT, 1428636_AT, 1455446_X_AT, 1417429_AT, 1448717_AT, 1416759_AT, 1433545_S_AT, 1439096_AT, 1417629_AT, 1424268_AT, 1415984_AT, 1455435_S_AT, 1416408_AT	911	103	17854	3.04439	0.0955903	0.0124806	0.314462
SP_PIR_KEYWORDS	FAD	16	1.57171	0.000415303	1415993_AT, 1434354_AT, 1428613_AT, 1422904_AT, 1428636_AT, 1455446_X_AT, 1417429_AT, 1448717_AT, 1416759_AT, 1433545_S_AT, 1439096_AT, 1417629_AT, 1424268_AT, 1415984_AT, 1455435_S_AT, 1416408_AT	911	109	17854	2.87681	0.171527	0.0186412	0.588135
GOTERM_MF_FAT	GO:0050660~FAD binding	11	1.08055	0.00229874	1415993_AT, 1422904_AT, 1428613_AT, 1428636_AT, 1455446_X_AT, 1415984_AT, 1455435_S_AT, 1417429_AT, 1448717_AT, 1433545_S_AT, 1416408_AT	652	71	13288	3.15752	0.847093	0.0990714	3.47983
UP_SEQ_FEATURE	nucleotide phosphate-binding region:FAD	10	0.982318	0.00490713	1415993_AT, 1439096_AT, 1422904_AT, 1455446_X_AT, 1415984_AT, 1455435_S_AT, 1417429_AT, 1448717_AT, 1416759_AT, 1433545_S_AT	905	58	16021	3.0522	0.999972	0.527386	8.16831
Annotation Cluster 12	Enrichment Score: 3.7972867814149005
Category	Term	Count	%	PValue	Genes	List Total	Pop Hits	Pop Total	Fold Enrichment	Bonferroni	Benjamini	FDR
GOTERM_BP_FAT	GO:0006732~coenzyme metabolic process	24	2.35756	2.66826e-07	1423780_AT, 1449118_AT, 1422478_A_AT, 1453065_AT, 1418186_AT, 1417273_AT, 1417883_AT, 1449106_AT, 1452823_AT, 1416617_AT, 1430896_S_AT, 1460257_A_AT, 1448382_AT, 1450048_A_AT, 1429352_AT, 1418509_AT, 1419974_AT, 1428134_AT, 1416788_A_AT, 1449964_A_AT, 1454748_AT, 1417193_AT, 1419456_AT, 1418715_AT	648	143	13588	3.5193	0.000650843	0.00016275	0.000469406
GOTERM_BP_FAT	GO:0051186~cofactor metabolic process	25	2.4558	5.72726e-06	1423780_AT, 1453065_AT, 1418186_AT, 1449106_AT, 1417273_AT, 1430896_S_AT, 1418509_AT, 1419974_AT, 1416788_A_AT, 1428134_AT, 1427282_A_AT, 1454748_AT, 1419456_AT, 1417193_AT, 1449118_AT, 1422478_A_AT, 1417883_AT, 1416617_AT, 1452823_AT, 1460257_A_AT, 1448382_AT, 1450048_A_AT, 1429352_AT, 1449964_A_AT, 1418715_AT	648	182	13588	2.88038	0.0138774	0.00174529	0.0100751
GOTERM_BP_FAT	GO:0006085~acetyl-CoA biosynthetic process	4	0.392927	0.00192888	1422478_A_AT, 1417273_AT, 1449964_A_AT, 1416617_AT	648	6	13588	13.9794	0.991004	0.133036	3.33958
GOTERM_BP_FAT	GO:0009108~coenzyme biosynthetic process	10	0.982318	0.00314101	1449118_AT, 1422478_A_AT, 1429352_AT, 1428134_AT, 1417273_AT, 1449964_A_AT, 1416617_AT, 1454748_AT, 1418715_AT, 1460257_A_AT	648	64	13588	3.27643	0.999536	0.187357	5.38409
GOTERM_BP_FAT	GO:0051188~cofactor biosynthetic process	11	1.08055	0.0111434	1449118_AT, 1422478_A_AT, 1429352_AT, 1428134_AT, 1417273_AT, 1449964_A_AT, 1427282_A_AT, 1416617_AT, 1454748_AT, 1418715_AT, 1460257_A_AT	648	91	13588	2.53473	1	0.343382	17.8923
Annotation Cluster 13	Enrichment Score: 3.1879608183611623
Category	Term	Count	%	PValue	Genes	List Total	Pop Hits	Pop Total	Fold Enrichment	Bonferroni	Benjamini	FDR
GOTERM_BP_FAT	GO:0016054~organic acid catabolic process	18	1.76817	1.99568e-07	1417220_AT, 1449047_AT, 1418780_AT, 1416647_AT, 1427153_AT, 1427552_A_AT, 1427981_A_AT, 1460194_AT, 1451511_AT, 1448382_AT, 1417629_AT, 1460644_AT, 1420776_A_AT, 1418321_AT, 1415984_AT, 1432164_A_AT, 1448842_AT, 1416408_AT	648	81	13588	4.65981	0.000486826	0.000162302	0.000351085
GOTERM_BP_FAT	GO:0046395~carboxylic acid catabolic process	18	1.76817	1.99568e-07	1417220_AT, 1449047_AT, 1418780_AT, 1416647_AT, 1427153_AT, 1427552_A_AT, 1427981_A_AT, 1460194_AT, 1451511_AT, 1448382_AT, 1417629_AT, 1460644_AT, 1420776_A_AT, 1418321_AT, 1415984_AT, 1432164_A_AT, 1448842_AT, 1416408_AT	648	81	13588	4.65981	0.000486826	0.000162302	0.000351085
GOTERM_BP_FAT	GO:0009310~amine catabolic process	13	1.27701	4.85183e-05	1417220_AT, 1416647_AT, 1427153_AT, 1427552_A_AT, 1451511_AT, 1427981_A_AT, 1418701_AT, 1417629_AT, 1460644_AT, 1420776_A_AT, 1424268_AT, 1432164_A_AT, 1448842_AT	648	65	13588	4.19383	0.111648	0.00786143	0.0853204
GOTERM_BP_FAT	GO:0009063~cellular amino acid catabolic process	11	1.08055	0.000199934	1417220_AT, 1417629_AT, 1460644_AT, 1416647_AT, 1420776_A_AT, 1427153_AT, 1427552_A_AT, 1432164_A_AT, 1427981_A_AT, 1451511_AT, 1448842_AT	648	54	13588	4.27149	0.386079	0.0267409	0.351148
GOTERM_BP_FAT	GO:0009083~branched chain family amino acid catabolic process	5	0.491159	0.000305739	1460644_AT, 1416647_AT, 1420776_A_AT, 1427153_AT, 1451511_AT	648	8	13588	13.1057	0.525796	0.0349057	0.536504
GOTERM_BP_FAT	GO:0009062~fatty acid catabolic process	6	0.589391	0.00396592	1449047_AT, 1418321_AT, 1415984_AT, 1460194_AT, 1448382_AT, 1416408_AT	648	23	13588	5.47021	0.999938	0.210606	6.75207
GOTERM_BP_FAT	GO:0019395~fatty acid oxidation	6	0.589391	0.00481651	1449047_AT, 1418321_AT, 1415984_AT, 1460194_AT, 1448382_AT, 1416408_AT	648	24	13588	5.24228	0.999992	0.23033	8.1431
GOTERM_BP_FAT	GO:0034440~lipid oxidation	6	0.589391	0.00481651	1449047_AT, 1418321_AT, 1415984_AT, 1460194_AT, 1448382_AT, 1416408_AT	648	24	13588	5.24228	0.999992	0.23033	8.1431
GOTERM_BP_FAT	GO:0016042~lipid catabolic process	14	1.37525	0.0114886	1449047_AT, 1418780_AT, 1432466_A_AT, 1452398_AT, 1416635_AT, 1460194_AT, 1452026_A_AT, 1448382_AT, 1418321_AT, 1448621_A_AT, 1415984_AT, 1451611_AT, 1415894_AT, 1416408_AT	648	134	13588	2.19081	1	0.347658	18.395
GOTERM_BP_FAT	GO:0044242~cellular lipid catabolic process	8	0.785855	0.0164266	1449047_AT, 1418321_AT, 1448621_A_AT, 1415984_AT, 1416635_AT, 1460194_AT, 1448382_AT, 1416408_AT	648	56	13588	2.99559	1	0.408358	25.277
GOTERM_BP_FAT	GO:0006635~fatty acid beta-oxidation	4	0.392927	0.0378631	1418321_AT, 1415984_AT, 1448382_AT, 1416408_AT	648	16	13588	5.24228	1	0.555986	49.2895
GOTERM_BP_FAT	GO:0030258~lipid modification	6	0.589391	0.0715004	1449047_AT, 1418321_AT, 1415984_AT, 1460194_AT, 1448382_AT, 1416408_AT	648	47	13588	2.67691	1	0.691306	72.8852
Annotation Cluster 14	Enrichment Score: 3.108696967504981
Category	Term	Count	%	PValue	Genes	List Total	Pop Hits	Pop Total	Fold Enrichment	Bonferroni	Benjamini	FDR
GOTERM_CC_FAT	GO:0044421~extracellular region part	65	6.38507	0.000464855	1419595_A_AT, 1416625_AT, 1416953_AT, 1427053_AT, 1419662_AT, 1415939_AT, 1449106_AT, 1422597_AT, 1449254_AT, 1434758_AT, 1419088_AT, 1426319_AT, 1416335_AT, 1448416_AT, 1417426_AT, 1421088_AT, 1417574_AT, 1423606_AT, 1423062_AT, 1416666_AT, 1419700_A_AT, 1422912_AT, 1415871_AT, 1449368_AT, 1450716_AT, 1416808_AT, 1417389_AT, 1450759_AT, 1427329_A_AT, 1438936_S_AT, 1424186_AT, 1423136_AT, 1417879…	681	774	12504	1.54196	0.159225	0.0107809	0.639878
GOTERM_CC_FAT	GO:0031012~extracellular matrix	32	3.14342	0.000739935	1424186_AT, 1423136_AT, 1416953_AT, 1427053_AT, 1419662_AT, 1415939_AT, 1418511_AT, 1422597_AT, 1423607_AT, 1416321_S_AT, 1434758_AT, 1416114_AT, 1419088_AT, 1418049_AT, 1425546_A_AT, 1417018_AT, 1448321_AT, 1421088_AT, 1423606_AT, 1452968_AT, 1425620_AT, 1426285_AT, 1422912_AT, 1415871_AT, 1425896_A_AT, 1449368_AT, 1450716_AT, 1417500_A_AT, 1416808_AT, 1417389_AT, 1448755_AT, 1438936_S_AT	681	309	12504	1.90149	0.241261	0.0161099	1.01674
GOTERM_CC_FAT	GO:0005578~proteinaceous extracellular matrix	31	3.04519	0.000807211	1424186_AT, 1423136_AT, 1427053_AT, 1416953_AT, 1419662_AT, 1415939_AT, 1418511_AT, 1422597_AT, 1423607_AT, 1416321_S_AT, 1416114_AT, 1419088_AT, 1418049_AT, 1425546_A_AT, 1417018_AT, 1448321_AT, 1421088_AT, 1423606_AT, 1452968_AT, 1425620_AT, 1426285_AT, 1422912_AT, 1415871_AT, 1425896_A_AT, 1449368_AT, 1450716_AT, 1417500_A_AT, 1416808_AT, 1417389_AT, 1448755_AT, 1438936_S_AT	681	297	12504	1.91649	0.260079	0.0165947	1.1087
SP_PIR_KEYWORDS	extracellular matrix	23	2.25933	0.00132347	1448321_AT, 1424186_AT, 1416953_AT, 1423606_AT, 1419662_AT, 1415939_AT, 1418511_AT, 1425620_AT, 1452968_AT, 1423607_AT, 1426285_AT, 1416321_S_AT, 1422912_AT, 1415871_AT, 1449254_AT, 1425896_A_AT, 1449368_AT, 1416114_AT, 1450716_AT, 1416808_AT, 1419088_AT, 1448755_AT, 1428259_AT	911	213	17854	2.11624	0.45115	0.0368013	1.86306
Annotation Cluster 15	Enrichment Score: 3.105276227565536
Category	Term	Count	%	PValue	Genes	List Total	Pop Hits	Pop Total	Fold Enrichment	Bonferroni	Benjamini	FDR
GOTERM_BP_FAT	GO:0015980~energy derivation by oxidation of organic compounds	18	1.76817	3.33327e-06	1448292_AT, 1453065_AT, 1424364_A_AT, 1428440_AT, 1422743_AT, 1420654_A_AT, 1425631_AT, 1450048_A_AT, 1417741_AT, 1448429_AT, 1422605_AT, 1429083_AT, 1416788_A_AT, 1427282_A_AT, 1416429_A_AT, 1417193_AT, 1434511_AT, 1448602_AT	648	98	13588	3.85147	0.00810021	0.00116121	0.00586383
GOTERM_BP_FAT	GO:0006006~glucose metabolic process	21	2.06287	1.02786e-05	1423780_AT, 1416204_AT, 1453065_AT, 1417273_AT, 1448825_AT, 1416383_A_AT, 1438774_S_AT, 1422743_AT, 1420654_A_AT, 1428245_AT, 1425631_AT, 1416183_A_AT, 1417741_AT, 1448429_AT, 1422605_AT, 1424714_AT, 1417951_AT, 1429083_AT, 1419456_AT, 1434511_AT, 1448602_AT	648	140	13588	3.14537	0.0247679	0.00250484	0.0180808
GOTERM_BP_FAT	GO:0019318~hexose metabolic process	23	2.25933	1.71352e-05	1423780_AT, 1416204_AT, 1453065_AT, 1417273_AT, 1448825_AT, 1416383_A_AT, 1438774_S_AT, 1426514_AT, 1422743_AT, 1424167_A_AT, 1420654_A_AT, 1428245_AT, 1425631_AT, 1416183_A_AT, 1417741_AT, 1417951_AT, 1448429_AT, 1422605_AT, 1424714_AT, 1429083_AT, 1419456_AT, 1434511_AT, 1448602_AT	648	169	13588	2.85379	0.0409482	0.003211	0.0301404
GOTERM_BP_FAT	GO:0005996~monosaccharide metabolic process	23	2.25933	0.000112332	1423780_AT, 1416204_AT, 1453065_AT, 1417273_AT, 1448825_AT, 1416383_A_AT, 1438774_S_AT, 1426514_AT, 1422743_AT, 1424167_A_AT, 1420654_A_AT, 1428245_AT, 1425631_AT, 1416183_A_AT, 1417741_AT, 1417951_AT, 1448429_AT, 1422605_AT, 1424714_AT, 1429083_AT, 1419456_AT, 1434511_AT, 1448602_AT	648	191	13588	2.52508	0.239748	0.0169857	0.197434
GOTERM_BP_FAT	GO:0006073~cellular glucan metabolic process	9	0.884086	0.000121773	1425631_AT, 1417741_AT, 1422605_AT, 1448429_AT, 1429083_AT, 1434511_AT, 1422743_AT, 1420654_A_AT, 1448602_AT	648	33	13588	5.71886	0.257064	0.0173272	0.214011
GOTERM_BP_FAT	GO:0044042~glucan metabolic process	9	0.884086	0.000121773	1425631_AT, 1417741_AT, 1422605_AT, 1448429_AT, 1429083_AT, 1434511_AT, 1422743_AT, 1420654_A_AT, 1448602_AT	648	33	13588	5.71886	0.257064	0.0173272	0.214011
GOTERM_BP_FAT	GO:0005977~glycogen metabolic process	9	0.884086	0.000121773	1425631_AT, 1417741_AT, 1422605_AT, 1448429_AT, 1429083_AT, 1434511_AT, 1422743_AT, 1420654_A_AT, 1448602_AT	648	33	13588	5.71886	0.257064	0.0173272	0.214011
GOTERM_BP_FAT	GO:0006112~energy reserve metabolic process	9	0.884086	0.000286127	1425631_AT, 1417741_AT, 1422605_AT, 1448429_AT, 1429083_AT, 1434511_AT, 1422743_AT, 1420654_A_AT, 1448602_AT	648	37	13588	5.1006	0.502545	0.0343101	0.50217
GOTERM_BP_FAT	GO:0044264~cellular polysaccharide metabolic process	9	0.884086	0.000835399	1425631_AT, 1417741_AT, 1422605_AT, 1448429_AT, 1429083_AT, 1434511_AT, 1422743_AT, 1420654_A_AT, 1448602_AT	648	43	13588	4.38889	0.86987	0.0727451	1.45952
SP_PIR_KEYWORDS	glycogen metabolism	6	0.589391	0.00217373	1425631_AT, 1417741_AT, 1422605_AT, 1434511_AT, 1422743_AT, 1448602_AT	911	19	17854	6.18892	0.626849	0.0563374	3.04289
SP_PIR_KEYWORDS	carbohydrate metabolism	11	1.08055	0.00378912	1425631_AT, 1417741_AT, 1422605_AT, 1417273_AT, 1448825_AT, 1438774_S_AT, 1434511_AT, 1419456_AT, 1422743_AT, 1417765_A_AT, 1448602_AT	911	73	17854	2.95316	0.820886	0.0823935	5.2482
GOTERM_BP_FAT	GO:0005976~polysaccharide metabolic process	12	1.17878	0.0042227	1425896_A_AT, 1449368_AT, 1425631_AT, 1429159_AT, 1417741_AT, 1422605_AT, 1448429_AT, 1429083_AT, 1434511_AT, 1422743_AT, 1420654_A_AT, 1448602_AT	648	92	13588	2.7351	0.999967	0.217951	7.17408
KEGG_PATHWAY	mmu00500:Starch and sucrose metabolism	7	0.687623	0.00813265	1417741_AT, 1429083_AT, 1438774_S_AT, 1420654_A_AT, 1417765_A_AT, 1448602_AT, 1440339_AT	288	36	5738	3.87404	0.729246	0.122479	9.38969
GOTERM_BP_FAT	GO:0005978~glycogen biosynthetic process	4	0.392927	0.0133084	1425631_AT, 1448429_AT, 1429083_AT, 1420654_A_AT	648	11	13588	7.62514	1	0.357099	20.9981
GOTERM_BP_FAT	GO:0009250~glucan biosynthetic process	4	0.392927	0.0133084	1425631_AT, 1448429_AT, 1429083_AT, 1420654_A_AT	648	11	13588	7.62514	1	0.357099	20.9981
GOTERM_BP_FAT	GO:0033692~cellular polysaccharide biosynthetic process	4	0.392927	0.0670502	1425631_AT, 1448429_AT, 1429083_AT, 1420654_A_AT	648	20	13588	4.19383	1	0.671794	70.5057
GOTERM_BP_FAT	GO:0000271~polysaccharide biosynthetic process	4	0.392927	0.169739	1425631_AT, 1448429_AT, 1429083_AT, 1420654_A_AT	648	30	13588	2.79588	1	0.847913	96.2086
Annotation Cluster 16	Enrichment Score: 3.059221317980605
Category	Term	Count	%	PValue	Genes	List Total	Pop Hits	Pop Total	Fold Enrichment	Bonferroni	Benjamini	FDR
SMART	SM00121:IB	8	0.785855	8.76719e-06	1419292_AT, 1422313_A_AT, 1416953_AT, 1426851_A_AT, 1416749_AT, 1423062_AT, 1421991_A_AT, 1426951_AT	397	19	9131	9.68421	0.00199693	0.00199693	0.0112236
INTERPRO	IPR000867:Insulin-like growth factor-binding protein, IGFBP	8	0.785855	1.82319e-05	1419292_AT, 1422313_A_AT, 1416953_AT, 1426851_A_AT, 1416749_AT, 1423062_AT, 1421991_A_AT, 1426951_AT	860	19	17763	8.6967	0.0239214	0.00603476	0.0298424
UP_SEQ_FEATURE	domain:IGFBP N-terminal	8	0.785855	3.26931e-05	1419292_AT, 1422313_A_AT, 1416953_AT, 1426851_A_AT, 1416749_AT, 1423062_AT, 1421991_A_AT, 1426951_AT	905	18	16021	7.86789	0.0673596	0.0138503	0.0566174
GOTERM_MF_FAT	GO:0005520~insulin-like growth factor binding	8	0.785855	5.86431e-05	1419292_AT, 1422313_A_AT, 1416953_AT, 1426851_A_AT, 1416749_AT, 1423062_AT, 1421991_A_AT, 1426951_AT	652	22	13288	7.41104	0.0467272	0.00596392	0.0902135
GOTERM_MF_FAT	GO:0019838~growth factor binding	12	1.17878	0.000708478	1419292_AT, 1417271_A_AT, 1422313_A_AT, 1416953_AT, 1426851_A_AT, 1416749_AT, 1423062_AT, 1418049_AT, 1425620_AT, 1451912_A_AT, 1421991_A_AT, 1426951_AT	652	72	13288	3.39673	0.439162	0.0435114	1.0848
INTERPRO	IPR017891:Insulin-like growth factor binding protein, N-terminal	5	0.491159	0.00136373	1422313_A_AT, 1416953_AT, 1426851_A_AT, 1423062_AT, 1421991_A_AT	860	11	17763	9.38848	0.836716	0.130124	2.20925
SMART	SM00211:TY	5	0.491159	0.00418514	1448321_AT, 1416808_AT, 1422313_A_AT, 1423062_AT, 1421991_A_AT	397	16	9131	7.1875	0.615655	0.272934	5.22768
GOTERM_BP_FAT	GO:0001558~regulation of cell growth	12	1.17878	0.0042227	1419292_AT, 1416330_AT, 1415923_AT, 1422313_A_AT, 1416953_AT, 1426851_A_AT, 1416749_AT, 1423062_AT, 1437122_AT, 1421991_A_AT, 1426951_AT, 1418571_AT	648	92	13588	2.7351	0.999967	0.217951	7.17408
SP_PIR_KEYWORDS	Growth factor binding	5	0.491159	0.00582629	1422313_A_AT, 1416749_AT, 1423062_AT, 1418049_AT, 1421991_A_AT	911	15	17854	6.53275	0.929138	0.100468	7.96284
INTERPRO	IPR000716:Thyroglobulin type-1	5	0.491159	0.00619888	1448321_AT, 1416808_AT, 1422313_A_AT, 1423062_AT, 1421991_A_AT	860	16	17763	6.45458	0.999741	0.291122	9.67851
INTERPRO	IPR009168:Insulin-like growth factor binding protein	3	0.294695	0.0307696	1422313_A_AT, 1423062_AT, 1421991_A_AT	860	6	17763	10.3273	1	0.664525	40.048
UP_SEQ_FEATURE	domain:Thyroglobulin type-1	4	0.392927	0.033481	1416808_AT, 1422313_A_AT, 1423062_AT, 1421991_A_AT	905	13	16021	5.447	1	0.925295	44.562
Annotation Cluster 17	Enrichment Score: 2.986584767618899
Category	Term	Count	%	PValue	Genes	List Total	Pop Hits	Pop Total	Fold Enrichment	Bonferroni	Benjamini	FDR
INTERPRO	IPR000301:Tetraspanin, subgroup	8	0.785855	0.000228839	1448276_AT, 1416330_AT, 1417502_AT, 1454604_S_AT, 1416009_AT, 1416872_AT, 1424653_AT, 1418643_AT	860	27	17763	6.1199	0.26209	0.037279	0.373963
INTERPRO	IPR018499:Tetraspanin	8	0.785855	0.000572305	1448276_AT, 1416330_AT, 1417502_AT, 1454604_S_AT, 1416009_AT, 1416872_AT, 1424653_AT, 1418643_AT	860	31	17763	5.33023	0.532445	0.0732059	0.932784
INTERPRO	IPR018503:Tetraspanin, conserved site	7	0.687623	0.000798906	1448276_AT, 1416330_AT, 1417502_AT, 1454604_S_AT, 1416009_AT, 1416872_AT, 1418643_AT	860	24	17763	6.02427	0.654019	0.0846489	1.29985
PIR_SUPERFAMILY	PIRSF002419:CD9 antigen	5	0.491159	0.0108145	1448276_AT, 1416330_AT, 1417502_AT, 1416009_AT, 1416872_AT	463	16	8136	5.49136	0.995877	0.746596	14.5126
Annotation Cluster 18	Enrichment Score: 2.9148727089275526
Category	Term	Count	%	PValue	Genes	List Total	Pop Hits	Pop Total	Fold Enrichment	Bonferroni	Benjamini	FDR
KEGG_PATHWAY	mmu00480:Glutathione metabolism	14	1.37525	1.0208e-06	1416842_AT, 1418186_AT, 1424359_AT, 1449106_AT, 1417883_AT, 1452823_AT, 1427552_A_AT, 1416411_AT, 1450048_A_AT, 1416416_X_AT, 1448300_AT, 1421260_A_AT, 1417836_AT, 1416368_AT	288	52	5738	5.36405	0.000163315	4.08312e-05	0.0012326
GOTERM_MF_FAT	GO:0004364~glutathione transferase activity	9	0.884086	2.26223e-05	1416416_X_AT, 1416842_AT, 1448300_AT, 1418186_AT, 1417883_AT, 1427552_A_AT, 1452823_AT, 1416368_AT, 1416411_AT	652	26	13288	7.05474	0.0182907	0.00263367	0.03481
KEGG_PATHWAY	mmu00982:Drug metabolism	14	1.37525	7.1983e-05	1416842_AT, 1434354_AT, 1422904_AT, 1418186_AT, 1416225_AT, 1417883_AT, 1452823_AT, 1427552_A_AT, 1417429_AT, 1416411_AT, 1419039_AT, 1416416_X_AT, 1448300_AT, 1416368_AT	288	75	5738	3.71907	0.0114516	0.00230089	0.086884
GOTERM_MF_FAT	GO:0016765~transferase activity, transferring alkyl or aryl (other than methyl) groups	10	0.982318	0.000983645	1416416_X_AT, 1416842_AT, 1448300_AT, 1421260_A_AT, 1418186_AT, 1417883_AT, 1427552_A_AT, 1452823_AT, 1416368_AT, 1416411_AT	652	53	13288	3.84535	0.552039	0.0489519	1.50316
UP_SEQ_FEATURE	domain:GST N-terminal	7	0.687623	0.00108483	1416416_X_AT, 1416842_AT, 1418186_AT, 1417883_AT, 1427552_A_AT, 1416368_AT, 1416411_AT	905	22	16021	5.6327	0.901254	0.226821	1.86265
KEGG_PATHWAY	mmu00980:Metabolism of xenobiotics by cytochrome P450	11	1.08055	0.00146275	1416416_X_AT, 1416842_AT, 1448300_AT, 1422438_AT, 1418186_AT, 1416225_AT, 1417883_AT, 1427552_A_AT, 1452823_AT, 1416368_AT, 1416411_AT	288	66	5738	3.3206	0.208805	0.0329051	1.75201
INTERPRO	IPR004045:Glutathione S-transferase, N-terminal	7	0.687623	0.00155224	1416416_X_AT, 1416842_AT, 1418186_AT, 1417883_AT, 1427552_A_AT, 1416368_AT, 1416411_AT	860	27	17763	5.35491	0.872925	0.137013	2.51102
INTERPRO	IPR004046:Glutathione S-transferase, C-terminal	7	0.687623	0.00189581	1416416_X_AT, 1416842_AT, 1418186_AT, 1417883_AT, 1427552_A_AT, 1416368_AT, 1416411_AT	860	28	17763	5.16366	0.919543	0.154648	3.05874
PIR_SUPERFAMILY	PIRSF000503:glutathione transferase	6	0.589391	0.00345732	1416416_X_AT, 1416842_AT, 1418186_AT, 1417883_AT, 1416368_AT, 1416411_AT	463	19	8136	5.54916	0.826047	0.582924	4.87162
INTERPRO	IPR012335:Thioredoxin fold	13	1.27701	0.00512945	1416842_AT, 1416528_AT, 1418186_AT, 1449106_AT, 1417883_AT, 1427552_A_AT, 1416411_AT, 1416416_X_AT, 1421871_AT, 1417836_AT, 1422644_AT, 1424099_AT, 1416368_AT	860	106	17763	2.53312	0.998919	0.289277	8.07415
INTERPRO	IPR017933:Glutathione S-transferase/chloride channel, C-terminal	7	0.687623	0.00528991	1416416_X_AT, 1416842_AT, 1418186_AT, 1417883_AT, 1427552_A_AT, 1416368_AT, 1416411_AT	860	34	17763	4.25243	0.999127	0.273971	8.31657
UP_SEQ_FEATURE	domain:GST C-terminal	7	0.687623	0.00948888	1416416_X_AT, 1416842_AT, 1418186_AT, 1417883_AT, 1427552_A_AT, 1416368_AT, 1416411_AT	905	33	16021	3.75513	1	0.719456	15.2238
INTERPRO	IPR003081:Glutathione S-transferase, Mu class	3	0.294695	0.0417147	1416416_X_AT, 1416842_AT, 1416411_AT	860	7	17763	8.85199	1	0.765645	50.2194
INTERPRO	IPR010987:Glutathione S-transferase, C-terminal-like	5	0.491159	0.0548512	1418186_AT, 1417883_AT, 1427552_A_AT, 1416368_AT, 1416411_AT	860	30	17763	3.44244	1	0.810773	60.2877
Annotation Cluster 19	Enrichment Score: 2.851735277735814
Category	Term	Count	%	PValue	Genes	List Total	Pop Hits	Pop Total	Fold Enrichment	Bonferroni	Benjamini	FDR
GOTERM_BP_FAT	GO:0009081~branched chain family amino acid metabolic process	8	0.785855	2.4737e-06	1423780_AT, 1417962_S_AT, 1448104_AT, 1460644_AT, 1416647_AT, 1420776_A_AT, 1427153_AT, 1451511_AT	648	15	13588	11.1835	0.00601765	0.00120644	0.00435171
GOTERM_BP_FAT	GO:0009083~branched chain family amino acid catabolic process	5	0.491159	0.000305739	1460644_AT, 1416647_AT, 1420776_A_AT, 1427153_AT, 1451511_AT	648	8	13588	13.1057	0.525796	0.0349057	0.536504
GOTERM_CC_FAT	GO:0045240~dihydrolipoyl dehydrogenase complex	3	0.294695	0.00853973	1460644_AT, 1416647_AT, 1427153_AT	681	3	12504	18.3612	0.959197	0.120111	11.1666
GOTERM_CC_FAT	GO:0030062~mitochondrial tricarboxylic acid cycle enzyme complex	3	0.294695	0.00853973	1460644_AT, 1416647_AT, 1427153_AT	681	3	12504	18.3612	0.959197	0.120111	11.1666
GOTERM_CC_FAT	GO:0005947~mitochondrial alpha-ketoglutarate dehydrogenase complex	3	0.294695	0.00853973	1460644_AT, 1416647_AT, 1427153_AT	681	3	12504	18.3612	0.959197	0.120111	11.1666
GOTERM_CC_FAT	GO:0045239~tricarboxylic acid cycle enzyme complex	3	0.294695	0.0164648	1460644_AT, 1416647_AT, 1427153_AT	681	4	12504	13.7709	0.997955	0.204951	20.4837
Annotation Cluster 20	Enrichment Score: 2.591157836158265
Category	Term	Count	%	PValue	Genes	List Total	Pop Hits	Pop Total	Fold Enrichment	Bonferroni	Benjamini	FDR
INTERPRO	IPR002113:Adenine nucleotide translocator 1	8	0.785855	0.000134816	1424912_AT, 1424316_AT, 1423108_AT, 1428440_AT, 1455506_AT, 1424562_A_AT, 1428190_AT, 1426586_AT	860	25	17763	6.60949	0.163935	0.0294005	0.220473
INTERPRO	IPR018108:Mitochondrial substrate/solute carrier	10	0.982318	0.000783573	1427483_AT, 1424912_AT, 1424316_AT, 1423108_AT, 1460718_S_AT, 1428440_AT, 1455506_AT, 1424562_A_AT, 1428190_AT, 1426586_AT	860	52	17763	3.97205	0.646896	0.0902957	1.27505
INTERPRO	IPR001993:Mitochondrial substrate carrier	9	0.884086	0.00223934	1427483_AT, 1424912_AT, 1424316_AT, 1423108_AT, 1428440_AT, 1455506_AT, 1424562_A_AT, 1428190_AT, 1426586_AT	860	49	17763	3.79371	0.949063	0.169787	3.60349
UP_SEQ_FEATURE	repeat:Solcar 1	9	0.884086	0.0044046	1427483_AT, 1424912_AT, 1424316_AT, 1423108_AT, 1460718_S_AT, 1428440_AT, 1455506_AT, 1424562_A_AT, 1426586_AT	905	47	16021	3.38989	0.999919	0.515331	7.36165
UP_SEQ_FEATURE	repeat:Solcar 2	9	0.884086	0.0044046	1427483_AT, 1424912_AT, 1424316_AT, 1423108_AT, 1460718_S_AT, 1428440_AT, 1455506_AT, 1424562_A_AT, 1426586_AT	905	47	16021	3.38989	0.999919	0.515331	7.36165
PIR_SUPERFAMILY	PIRSF002458:ADP,ATP carrier protein	7	0.687623	0.00503802	1424912_AT, 1424316_AT, 1423108_AT, 1455506_AT, 1424562_A_AT, 1428190_AT, 1426586_AT	463	29	8136	4.2416	0.921967	0.572675	7.02455
INTERPRO	IPR002067:Mitochondrial carrier protein	6	0.589391	0.0073662	1427483_AT, 1424912_AT, 1424316_AT, 1428440_AT, 1424562_A_AT, 1428190_AT	860	26	17763	4.76646	0.999946	0.31452	11.3997
UP_SEQ_FEATURE	repeat:Solcar 3	8	0.785855	0.0109516	1427483_AT, 1424912_AT, 1424316_AT, 1423108_AT, 1428440_AT, 1455506_AT, 1424562_A_AT, 1426586_AT	905	44	16021	3.21868	1	0.728808	17.3666
Annotation Cluster 21	Enrichment Score: 2.5641515640424393
Category	Term	Count	%	PValue	Genes	List Total	Pop Hits	Pop Total	Fold Enrichment	Bonferroni	Benjamini	FDR
GOTERM_BP_FAT	GO:0006790~sulfur metabolic process	14	1.37525	0.000492862	1453065_AT, 1418186_AT, 1449106_AT, 1417883_AT, 1452823_AT, 1427981_A_AT, 1452141_A_AT, 1449368_AT, 1417962_S_AT, 1419519_AT, 1436319_AT, 1417193_AT, 1430388_A_AT, 1448842_AT	648	94	13588	3.12306	0.699672	0.046976	0.863521
GOTERM_BP_FAT	GO:0006749~glutathione metabolic process	6	0.589391	0.00481651	1453065_AT, 1418186_AT, 1417883_AT, 1449106_AT, 1452823_AT, 1417193_AT	648	24	13588	5.24228	0.999992	0.23033	8.1431
GOTERM_BP_FAT	GO:0006518~peptide metabolic process	7	0.687623	0.00855239	1453065_AT, 1418186_AT, 1428333_AT, 1417883_AT, 1449106_AT, 1452823_AT, 1417193_AT	648	38	13588	3.86274	1	0.298976	14.0241
Annotation Cluster 22	Enrichment Score: 2.51564342470292
Category	Term	Count	%	PValue	Genes	List Total	Pop Hits	Pop Total	Fold Enrichment	Bonferroni	Benjamini	FDR
INTERPRO	IPR001753:Crotonase, core	8	0.785855	1.53681e-06	1420776_A_AT, 1418321_AT, 1452341_AT, 1451511_AT, 1431012_A_AT, 1448491_AT, 1448382_AT, 1418862_AT	860	14	17763	11.8027	0.0020388	0.0020388	0.00251581
GOTERM_MF_FAT	GO:0004165~dodecenoyl-CoA delta-isomerase activity	3	0.294695	0.00695586	1418321_AT, 1431012_A_AT, 1448382_AT	652	3	13288	20.3804	0.99664	0.196734	10.1856
GOTERM_MF_FAT	GO:0016863~intramolecular oxidoreductase activity, transposing C=C bonds	4	0.392927	0.0284328	1418321_AT, 1416335_AT, 1431012_A_AT, 1448382_AT	652	14	13288	5.82296	1	0.499564	35.8484
GOTERM_MF_FAT	GO:0016860~intramolecular oxidoreductase activity	4	0.392927	0.284863	1418321_AT, 1416335_AT, 1431012_A_AT, 1448382_AT	652	38	13288	2.1453	1	0.958467	99.4258
Annotation Cluster 23	Enrichment Score: 2.435464919618887
Category	Term	Count	%	PValue	Genes	List Total	Pop Hits	Pop Total	Fold Enrichment	Bonferroni	Benjamini	FDR
SMART	SM00132:LIM	13	1.27701	7.17039e-05	1424596_S_AT, 1424408_AT, 1417872_AT, 1417928_AT, 1455056_AT, 1416759_AT, 1416326_AT, 1420731_A_AT, 1449041_A_AT, 1417311_AT, 1453103_AT, 1418136_AT, 1428779_AT, 1442376_AT	397	74	9131	4.04054	0.0162162	0.00814122	0.0917604
INTERPRO	IPR001781:Zinc finger, LIM-type	13	1.27701	0.000208938	1424596_S_AT, 1424408_AT, 1417872_AT, 1417928_AT, 1455056_AT, 1416759_AT, 1416326_AT, 1420731_A_AT, 1449041_A_AT, 1417311_AT, 1453103_AT, 1418136_AT, 1428779_AT, 1442376_AT	860	74	17763	3.62852	0.242324	0.0388673	0.341495
SP_PIR_KEYWORDS	LIM domain	12	1.17878	0.00111374	1424596_S_AT, 1417872_AT, 1424408_AT, 1417928_AT, 1455056_AT, 1416759_AT, 1416326_AT, 1420731_A_AT, 1453103_AT, 1417311_AT, 1418136_AT, 1449041_A_AT, 1442376_AT	911	73	17854	3.22163	0.396378	0.0354153	1.56999
UP_SEQ_FEATURE	domain:LIM zinc-binding 4	4	0.392927	0.0210079	1418136_AT, 1453103_AT, 1424408_AT, 1417872_AT, 1442376_AT	905	11	16021	6.43737	1	0.872356	30.7734
UP_SEQ_FEATURE	domain:LIM zinc-binding 1	8	0.785855	0.0213545	1424596_S_AT, 1420731_A_AT, 1449041_A_AT, 1418136_AT, 1417311_AT, 1453103_AT, 1424408_AT, 1417872_AT, 1442376_AT	905	50	16021	2.83244	1	0.864914	31.1967
UP_SEQ_FEATURE	domain:LIM zinc-binding 2	8	0.785855	0.0213545	1424596_S_AT, 1420731_A_AT, 1449041_A_AT, 1418136_AT, 1417311_AT, 1453103_AT, 1424408_AT, 1417872_AT, 1442376_AT	905	50	16021	2.83244	1	0.864914	31.1967
UP_SEQ_FEATURE	domain:LIM zinc-binding 3	5	0.491159	0.0559809	1449041_A_AT, 1418136_AT, 1453103_AT, 1424408_AT, 1417872_AT, 1442376_AT	905	26	16021	3.40438	1	0.975854	63.1357
Annotation Cluster 24	Enrichment Score: 2.3653724771933353
Category	Term	Count	%	PValue	Genes	List Total	Pop Hits	Pop Total	Fold Enrichment	Bonferroni	Benjamini	FDR
SP_PIR_KEYWORDS	selenium	7	0.687623	0.00298645	1424394_AT, 1418888_A_AT, 1416521_AT, 1450699_AT, 1449106_AT, 1417580_S_AT, 1452141_A_AT, 1436349_AT	911	29	17854	4.73061	0.742023	0.0688265	4.1583
GOTERM_MF_FAT	GO:0008430~selenium binding	7	0.687623	0.00348103	1424394_AT, 1418888_A_AT, 1416521_AT, 1450699_AT, 1449106_AT, 1417580_S_AT, 1452141_A_AT, 1436349_AT	652	31	13288	4.60202	0.941894	0.12672	5.22519
SP_PIR_KEYWORDS	selenocysteine	6	0.589391	0.00770938	1424394_AT, 1418888_A_AT, 1416521_AT, 1449106_AT, 1452141_A_AT, 1436349_AT	911	25	17854	4.70358	0.96998	0.121771	10.4077
Annotation Cluster 25	Enrichment Score: 2.1784677157868284
Category	Term	Count	%	PValue	Genes	List Total	Pop Hits	Pop Total	Fold Enrichment	Bonferroni	Benjamini	FDR
UP_SEQ_FEATURE	site:Important for catalytic activity	6	0.589391	0.000321038	1434354_AT, 1455972_X_AT, 1418321_AT, 1452341_AT, 1448491_AT, 1448382_AT	905	12	16021	8.85138	0.495851	0.0932066	0.554662
KEGG_PATHWAY	mmu00380:Tryptophan metabolism	8	0.785855	0.0032669	1434354_AT, 1424182_AT, 1455972_X_AT, 1452341_AT, 1416429_A_AT, 1418697_AT, 1448717_AT, 1448382_AT	288	40	5738	3.98472	0.407592	0.0633494	3.87416
KEGG_PATHWAY	mmu00650:Butanoate metabolism	6	0.589391	0.0354675	1426959_AT, 1424182_AT, 1453065_AT, 1455972_X_AT, 1452341_AT, 1448382_AT	288	37	5738	3.23086	0.996905	0.288141	35.3411
KEGG_PATHWAY	mmu00310:Lysine degradation	6	0.589391	0.0519525	1416686_AT, 1424182_AT, 1455972_X_AT, 1452341_AT, 1448717_AT, 1448382_AT	288	41	5738	2.91565	0.999804	0.33401	47.4919
Annotation Cluster 26	Enrichment Score: 2.0921315789385915
Category	Term	Count	%	PValue	Genes	List Total	Pop Hits	Pop Total	Fold Enrichment	Bonferroni	Benjamini	FDR
UP_SEQ_FEATURE	binding site:Substrate; via amide nitrogen	10	0.982318	3.37549e-06	1418321_AT, 1455446_X_AT, 1415984_AT, 1452341_AT, 1416335_AT, 1451511_AT, 1448491_AT, 1448717_AT, 1433545_S_AT, 1432372_A_AT	905	24	16021	7.37615	0.00717408	0.0023971	0.00584701
GOTERM_MF_FAT	GO:0050660~FAD binding	11	1.08055	0.00229874	1415993_AT, 1422904_AT, 1428613_AT, 1428636_AT, 1455446_X_AT, 1415984_AT, 1455435_S_AT, 1417429_AT, 1448717_AT, 1433545_S_AT, 1416408_AT	652	71	13288	3.15752	0.847093	0.0990714	3.47983
INTERPRO	IPR013786:Acyl-CoA dehydrogenase/oxidase, N-terminal	5	0.491159	0.00368276	1455446_X_AT, 1415984_AT, 1448717_AT, 1433545_S_AT, 1416408_AT	860	14	17763	7.37666	0.992551	0.250403	5.86121
INTERPRO	IPR013764:Acyl-CoA oxidase/dehydrogenase, type1/2, C-terminal	5	0.491159	0.00483179	1455446_X_AT, 1415984_AT, 1448717_AT, 1433545_S_AT, 1416408_AT	860	15	17763	6.88488	0.998391	0.287186	7.62286
UP_SEQ_FEATURE	nucleotide phosphate-binding region:FAD	10	0.982318	0.00490713	1415993_AT, 1439096_AT, 1422904_AT, 1455446_X_AT, 1415984_AT, 1455435_S_AT, 1417429_AT, 1448717_AT, 1416759_AT, 1433545_S_AT	905	58	16021	3.0522	0.999972	0.527386	8.16831
INTERPRO	IPR006091:Acyl-CoA oxidase/dehydrogenase, central region	5	0.491159	0.00619888	1455446_X_AT, 1415984_AT, 1448717_AT, 1433545_S_AT, 1416408_AT	860	16	17763	6.45458	0.999741	0.291122	9.67851
GOTERM_MF_FAT	GO:0003995~acyl-CoA dehydrogenase activity	5	0.491159	0.00647989	1455446_X_AT, 1415984_AT, 1448717_AT, 1433545_S_AT, 1416408_AT	652	16	13288	6.36887	0.995032	0.19831	9.52076
INTERPRO	IPR006092:Acyl-CoA dehydrogenase, N-terminal	4	0.392927	0.0138896	1455446_X_AT, 1415984_AT, 1448717_AT, 1433545_S_AT	860	11	17763	7.51078	1	0.461601	20.465
INTERPRO	IPR006090:Acyl-CoA oxidase/dehydrogenase, type 1	4	0.392927	0.0224023	1455446_X_AT, 1415984_AT, 1448717_AT, 1433545_S_AT	860	13	17763	6.35528	1	0.5767	30.9893
PIR_SUPERFAMILY	PIRSF000182:acyl-CoA dehydrogenase	3	0.294695	0.0414379	1455446_X_AT, 1415984_AT, 1448717_AT	463	6	8136	8.78618	1	0.95279	45.6807
INTERPRO	IPR006089:Acyl-CoA dehydrogenase, conserved site	3	0.294695	0.0812398	1455446_X_AT, 1415984_AT, 1448717_AT	860	10	17763	6.1964	1	0.870729	75.0195
UP_SEQ_FEATURE	binding site:FAD	4	0.392927	0.124422	1439096_AT, 1448717_AT, 1433545_S_AT, 1416408_AT	905	22	16021	3.21868	1	0.998406	89.9906
UP_SEQ_FEATURE	binding site:Substrate; via carbonyl oxygen	4	0.392927	0.178826	1455446_X_AT, 1415984_AT, 1448717_AT, 1433545_S_AT	905	26	16021	2.7235	1	0.999691	96.7054
Annotation Cluster 27	Enrichment Score: 2.0368405268024703
Category	Term	Count	%	PValue	Genes	List Total	Pop Hits	Pop Total	Fold Enrichment	Bonferroni	Benjamini	FDR
GOTERM_CC_FAT	GO:0044421~extracellular region part	65	6.38507	0.000464855	1419595_A_AT, 1416625_AT, 1416953_AT, 1427053_AT, 1419662_AT, 1415939_AT, 1449106_AT, 1422597_AT, 1449254_AT, 1434758_AT, 1419088_AT, 1426319_AT, 1416335_AT, 1448416_AT, 1417426_AT, 1421088_AT, 1417574_AT, 1423606_AT, 1423062_AT, 1416666_AT, 1419700_A_AT, 1422912_AT, 1415871_AT, 1449368_AT, 1450716_AT, 1416808_AT, 1417389_AT, 1450759_AT, 1427329_A_AT, 1438936_S_AT, 1424186_AT, 1423136_AT, 1417879…	681	774	12504	1.54196	0.159225	0.0107809	0.639878
GOTERM_CC_FAT	GO:0005615~extracellular space	40	3.92927	0.0204221	1419595_A_AT, 1423136_AT, 1416625_AT, 1417879_AT, 1432466_A_AT, 1449106_AT, 1449254_AT, 1422313_A_AT, 1418456_A_AT, 1426319_AT, 1416335_AT, 1436319_AT, 1448416_AT, 1424007_AT, 1417900_A_AT, 1430388_A_AT, 1417426_AT, 1425546_A_AT, 1421088_AT, 1417574_AT, 1423062_AT, 1416635_AT, 1416666_AT, 1419700_A_AT, 1417765_A_AT, 1440339_AT, 1422912_AT, 1452141_A_AT, 1415871_AT, 1447520_AT, 1420696_AT, 1420911…	681	511	12504	1.43728	0.999546	0.233093	24.7888
GOTERM_CC_FAT	GO:0005576~extracellular region	105	10.3143	0.0816695	1419292_AT, 1416625_AT, 1448377_AT, 1427053_AT, 1419662_AT, 1416749_AT, 1415939_AT, 1449254_AT, 1434758_AT, 1419088_AT, 1417962_S_AT, 1415894_AT, 1417399_AT, 1417426_AT, 1421088_AT, 1423606_AT, 1415812_AT, 1423062_AT, 1416666_AT, 1428853_AT, 1415871_AT, 1450716_AT, 1441850_X_AT, 1417389_AT, 1450759_AT, 1452590_A_AT, 1438936_S_AT, 1416221_AT, 1423607_AT, 1452026_A_AT, 1417393_A_AT, 1416114_AT, 141…	681	1680	12504	1.14758	1	0.484212	69.1568
Annotation Cluster 28	Enrichment Score: 2.0225243401717785
Category	Term	Count	%	PValue	Genes	List Total	Pop Hits	Pop Total	Fold Enrichment	Bonferroni	Benjamini	FDR
GOTERM_BP_FAT	GO:0060348~bone development	15	1.47348	0.0014331	1416953_AT, 1417817_A_AT, 1423062_AT, 1437122_AT, 1454867_AT, 1422912_AT, 1421027_A_AT, 1449254_AT, 1422313_A_AT, 1417092_AT, 1419519_AT, 1450759_AT, 1448416_AT, 1427191_AT, 1427048_AT	648	118	13588	2.66557	0.96978	0.110096	2.4914
GOTERM_BP_FAT	GO:0001649~osteoblast differentiation	9	0.884086	0.00153243	1422313_A_AT, 1450759_AT, 1419519_AT, 1417092_AT, 1417817_A_AT, 1423062_AT, 1422912_AT, 1421027_A_AT, 1427048_AT	648	47	13588	4.01537	0.976293	0.113708	2.66189
GOTERM_BP_FAT	GO:0001503~ossification	14	1.37525	0.00154627	1416953_AT, 1417817_A_AT, 1437122_AT, 1423062_AT, 1454867_AT, 1422912_AT, 1421027_A_AT, 1449254_AT, 1422313_A_AT, 1417092_AT, 1419519_AT, 1450759_AT, 1448416_AT, 1427048_AT	648	106	13588	2.76951	0.977082	0.111299	2.68563
GOTERM_BP_FAT	GO:0001501~skeletal system development	19	1.8664	0.136232	1416953_AT, 1417817_A_AT, 1423062_AT, 1437122_AT, 1454867_AT, 1421027_A_AT, 1422912_AT, 1449254_AT, 1426018_A_AT, 1420619_A_AT, 1422313_A_AT, 1450759_AT, 1419519_AT, 1417092_AT, 1418049_AT, 1448416_AT, 1451912_A_AT, 1427048_AT, 1427191_AT	648	285	13588	1.39794	1	0.817612	92.3953
GOTERM_BP_FAT	GO:0051216~cartilage development	7	0.687623	0.166785	1426018_A_AT, 1416953_AT, 1450759_AT, 1417092_AT, 1448416_AT, 1422912_AT, 1421027_A_AT	648	78	13588	1.88185	1	0.848397	95.9642
Annotation Cluster 29	Enrichment Score: 1.9824027068183585
Category	Term	Count	%	PValue	Genes	List Total	Pop Hits	Pop Total	Fold Enrichment	Bonferroni	Benjamini	FDR
GOTERM_BP_FAT	GO:0006979~response to oxidative stress	14	1.37525	0.000227118	1416526_A_AT, 1418626_A_AT, 1432466_A_AT, 1449106_AT, 1437122_AT, 1435436_AT, 1423630_AT, 1417836_AT, 1454748_AT, 1424099_AT, 1416429_A_AT, 1417193_AT, 1428259_AT, 1415996_AT	648	87	13588	3.37434	0.425486	0.0287487	0.398801
GOTERM_MF_FAT	GO:0016684~oxidoreductase activity, acting on peroxide as acceptor	8	0.785855	0.000314888	1423630_AT, 1417836_AT, 1449106_AT, 1424099_AT, 1427552_A_AT, 1452823_AT, 1416429_A_AT, 1428259_AT	652	28	13288	5.82296	0.226624	0.0230919	0.483516
GOTERM_MF_FAT	GO:0004601~peroxidase activity	8	0.785855	0.000314888	1423630_AT, 1417836_AT, 1449106_AT, 1424099_AT, 1427552_A_AT, 1452823_AT, 1416429_A_AT, 1428259_AT	652	28	13288	5.82296	0.226624	0.0230919	0.483516
GOTERM_BP_FAT	GO:0006800~oxygen and reactive oxygen species metabolic process	10	0.982318	0.000318867	1416034_AT, 1416526_A_AT, 1422904_AT, 1420387_AT, 1437122_AT, 1449106_AT, 1417193_AT, 1422470_AT, 1416429_A_AT, 1428259_AT	648	47	13588	4.46152	0.540749	0.0347526	0.559478
GOTERM_MF_FAT	GO:0016209~antioxidant activity	9	0.884086	0.000606638	1423630_AT, 1417836_AT, 1449106_AT, 1424099_AT, 1427552_A_AT, 1452823_AT, 1417193_AT, 1416429_A_AT, 1428259_AT	652	40	13288	4.58558	0.390531	0.0404241	0.92955
GOTERM_MF_FAT	GO:0004602~glutathione peroxidase activity	5	0.491159	0.000945722	1417836_AT, 1449106_AT, 1424099_AT, 1427552_A_AT, 1452823_AT	652	10	13288	10.1902	0.537946	0.0501694	1.4456
GOTERM_BP_FAT	GO:0042542~response to hydrogen peroxide	6	0.589391	0.00481651	1416526_A_AT, 1437122_AT, 1449106_AT, 1417193_AT, 1416429_A_AT, 1428259_AT	648	24	13588	5.24228	0.999992	0.23033	8.1431
GOTERM_BP_FAT	GO:0010035~response to inorganic substance	11	1.08055	0.0119874	1447863_S_AT, 1416526_A_AT, 1425560_A_AT, 1431980_A_AT, 1428440_AT, 1437122_AT, 1449106_AT, 1417193_AT, 1448416_AT, 1416429_A_AT, 1428259_AT	648	92	13588	2.50718	1	0.351267	19.1164
GOTERM_BP_FAT	GO:0034599~cellular response to oxidative stress	5	0.491159	0.0187896	1449106_AT, 1435436_AT, 1417193_AT, 1416429_A_AT, 1428259_AT	648	22	13588	4.76571	1	0.431314	28.373
SP_PIR_KEYWORDS	peroxidase	5	0.491159	0.0235366	1417836_AT, 1449106_AT, 1424099_AT, 1416429_A_AT, 1428259_AT	911	22	17854	4.45415	0.999979	0.258967	28.6966
GOTERM_BP_FAT	GO:0000302~response to reactive oxygen species	6	0.589391	0.0267712	1416526_A_AT, 1437122_AT, 1449106_AT, 1417193_AT, 1416429_A_AT, 1428259_AT	648	36	13588	3.49486	1	0.505587	37.9597
GOTERM_BP_FAT	GO:0034614~cellular response to reactive oxygen species	4	0.392927	0.0514477	1449106_AT, 1417193_AT, 1416429_A_AT, 1428259_AT	648	18	13588	4.65981	1	0.626109	60.5129
INTERPRO	IPR000889:Glutathione peroxidase	3	0.294695	0.0538677	1417836_AT, 1449106_AT, 1424099_AT	860	8	17763	7.74549	1	0.811989	59.6058
GOTERM_BP_FAT	GO:0042743~hydrogen peroxide metabolic process	4	0.392927	0.0670502	1416526_A_AT, 1449106_AT, 1416429_A_AT, 1428259_AT	648	20	13588	4.19383	1	0.671794	70.5057
PIR_SUPERFAMILY	PIRSF000303:Glutathion_perox	3	0.294695	0.0717513	1417836_AT, 1449106_AT, 1424099_AT	463	8	8136	6.58963	1	0.984668	65.8255
PIR_SUPERFAMILY	PIRSF000303:glutathione peroxidase	3	0.294695	0.0717513	1417836_AT, 1449106_AT, 1424099_AT	463	8	8136	6.58963	1	0.984668	65.8255
GOTERM_BP_FAT	GO:0042744~hydrogen peroxide catabolic process	3	0.294695	0.108979	1449106_AT, 1416429_A_AT, 1428259_AT	648	12	13588	5.24228	1	0.772775	86.8655
GOTERM_BP_FAT	GO:0070301~cellular response to hydrogen peroxide	3	0.294695	0.108979	1449106_AT, 1416429_A_AT, 1428259_AT	648	12	13588	5.24228	1	0.772775	86.8655
GOTERM_BP_FAT	GO:0042391~regulation of membrane potential	6	0.589391	0.674924	1429735_AT, 1416526_A_AT, 1437122_AT, 1423389_AT, 1417193_AT, 1422470_AT	648	119	13588	1.05727	1	0.997741	100
Annotation Cluster 30	Enrichment Score: 1.8399811228679708
Category	Term	Count	%	PValue	Genes	List Total	Pop Hits	Pop Total	Fold Enrichment	Bonferroni	Benjamini	FDR
GOTERM_CC_FAT	GO:0043292~contractile fiber	14	1.37525	0.00183586	1421287_A_AT, 1455610_AT, 1422943_A_AT, 1417307_AT, 1435751_AT, 1416454_S_AT, 1418551_AT, 1448394_AT, 1418142_AT, 1416455_A_AT, 1427735_A_AT, 1452879_AT, 1423155_AT, 1448602_AT	681	95	12504	2.70587	0.496113	0.0293605	2.50503
GOTERM_CC_FAT	GO:0044449~contractile fiber part	12	1.17878	0.00673177	1421287_A_AT, 1455610_AT, 1422943_A_AT, 1417307_AT, 1416455_A_AT, 1427735_A_AT, 1452879_AT, 1435751_AT, 1416454_S_AT, 1448602_AT, 1423155_AT, 1418551_AT	681	86	12504	2.56203	0.919495	0.0996545	8.9038
GOTERM_CC_FAT	GO:0030016~myofibril	12	1.17878	0.0102073	1448394_AT, 1455610_AT, 1422943_A_AT, 1417307_AT, 1418142_AT, 1416455_A_AT, 1427735_A_AT, 1452879_AT, 1435751_AT, 1448602_AT, 1423155_AT, 1418551_AT	681	91	12504	2.42126	0.978223	0.136869	13.2073
GOTERM_CC_FAT	GO:0030017~sarcomere	10	0.982318	0.029185	1455610_AT, 1422943_A_AT, 1417307_AT, 1416455_A_AT, 1427735_A_AT, 1452879_AT, 1435751_AT, 1448602_AT, 1423155_AT, 1418551_AT	681	80	12504	2.29515	0.999984	0.27743	33.5638
GOTERM_CC_FAT	GO:0030018~Z disc	7	0.687623	0.0372081	1455610_AT, 1422943_A_AT, 1417307_AT, 1416455_A_AT, 1452879_AT, 1448602_AT, 1423155_AT	681	46	12504	2.7941	0.999999	0.324885	40.7557
GOTERM_CC_FAT	GO:0031674~I band	7	0.687623	0.0665941	1455610_AT, 1422943_A_AT, 1417307_AT, 1416455_A_AT, 1452879_AT, 1448602_AT, 1423155_AT	681	53	12504	2.42507	1	0.428112	61.382
Annotation Cluster 31	Enrichment Score: 1.8274753451147336
Category	Term	Count	%	PValue	Genes	List Total	Pop Hits	Pop Total	Fold Enrichment	Bonferroni	Benjamini	FDR
UP_SEQ_FEATURE	metal ion-binding site:Divalent metal cation 2	6	0.589391	0.0116923	1445539_AT, 1440339_AT, 1417667_A_AT, 1415894_AT, 1433694_AT, 1440880_AT	905	25	16021	4.24866	1	0.732959	18.432
UP_SEQ_FEATURE	metal ion-binding site:Divalent metal cation 1	6	0.589391	0.0116923	1445539_AT, 1440339_AT, 1417667_A_AT, 1415894_AT, 1433694_AT, 1440880_AT	905	25	16021	4.24866	1	0.732959	18.432
GOTERM_MF_FAT	GO:0008081~phosphoric diester hydrolase activity	9	0.884086	0.0240863	1425338_AT, 1416999_AT, 1445539_AT, 1448621_A_AT, 1416635_AT, 1452398_AT, 1440339_AT, 1415894_AT, 1433694_AT	652	72	13288	2.54755	1	0.452766	31.2866
Annotation Cluster 32	Enrichment Score: 1.792849278577709
Category	Term	Count	%	PValue	Genes	List Total	Pop Hits	Pop Total	Fold Enrichment	Bonferroni	Benjamini	FDR
GOTERM_BP_FAT	GO:0030091~protein repair	3	0.294695	0.00657675	1439151_AT, 1418888_A_AT, 1424433_AT	648	3	13588	20.9691	1	0.257812	10.9598
INTERPRO	IPR002579:Methionine sulphoxide reductase B	3	0.294695	0.00678256	1439151_AT, 1418888_A_AT, 1424433_AT	860	3	17763	20.6547	0.999881	0.303381	10.543
GOTERM_MF_FAT	GO:0000318~protein-methionine-R-oxide reductase activity	3	0.294695	0.00695586	1439151_AT, 1418888_A_AT, 1424433_AT	652	3	13288	20.3804	0.99664	0.196734	10.1856
GOTERM_MF_FAT	GO:0008113~peptide-methionine-(S)-S-oxide reductase activity	3	0.294695	0.0134605	1439151_AT, 1418888_A_AT, 1424433_AT	652	4	13288	15.2853	0.999984	0.317044	18.8251
GOTERM_MF_FAT	GO:0016671~oxidoreductase activity, acting on sulfur group of donors, disulfide as acceptor	3	0.294695	0.0551332	1439151_AT, 1418888_A_AT, 1424433_AT	652	8	13288	7.64264	1	0.65911	58.2214
GOTERM_MF_FAT	GO:0016667~oxidoreductase activity, acting on sulfur group of donors	5	0.491159	0.0759754	1439151_AT, 1416528_AT, 1418888_A_AT, 1452823_AT, 1424433_AT	652	33	13288	3.08793	1	0.739012	70.3605
Annotation Cluster 33	Enrichment Score: 1.7350361042819802
Category	Term	Count	%	PValue	Genes	List Total	Pop Hits	Pop Total	Fold Enrichment	Bonferroni	Benjamini	FDR
INTERPRO	IPR011497:Protease inhibitor, Kazal-type	7	0.687623	0.00453849	1434537_AT, 1448321_AT, 1419292_AT, 1416114_AT, 1416221_AT, 1416749_AT, 1418030_AT, 1455803_AT	860	33	17763	4.38129	0.99762	0.285093	7.17616
UP_SEQ_FEATURE	domain:Kazal-like	8	0.785855	0.00560712	1434537_AT, 1448321_AT, 1419292_AT, 1416114_AT, 1416221_AT, 1416749_AT, 1418030_AT, 1455803_AT, 1433933_S_AT	905	39	16021	3.63134	0.999994	0.550481	9.28092
SMART	SM00280:KAZAL	6	0.589391	0.0556828	1434537_AT, 1448321_AT, 1419292_AT, 1416114_AT, 1416221_AT, 1416749_AT, 1418030_AT	397	48	9131	2.875	0.999998	0.695027	51.9774
INTERPRO	IPR002350:Proteinase inhibitor I1, Kazal	6	0.589391	0.0809995	1434537_AT, 1448321_AT, 1419292_AT, 1416114_AT, 1416221_AT, 1416749_AT, 1418030_AT	860	48	17763	2.58183	1	0.874732	74.9124
Annotation Cluster 34	Enrichment Score: 1.7279063145214069
Category	Term	Count	%	PValue	Genes	List Total	Pop Hits	Pop Total	Fold Enrichment	Bonferroni	Benjamini	FDR
INTERPRO	IPR001436:Alpha crystallin/Heat shock protein	4	0.392927	0.00525566	1417013_AT, 1422943_A_AT, 1416455_A_AT, 1436332_AT	860	8	17763	10.3273	0.999086	0.283398	8.26488
SP_PIR_KEYWORDS	stress response	8	0.785855	0.00727705	1450048_A_AT, 1417013_AT, 1427126_AT, 1422943_A_AT, 1450843_A_AT, 1452388_AT, 1448325_AT, 1436332_AT, 1416041_AT	911	45	17854	3.48413	0.963431	0.119488	9.8518
INTERPRO	IPR002068:Heat shock protein Hsp20	4	0.392927	0.0138896	1417013_AT, 1422943_A_AT, 1416455_A_AT, 1436332_AT	860	11	17763	7.51078	1	0.461601	20.465
GOTERM_BP_FAT	GO:0009408~response to heat	6	0.589391	0.0166959	1417013_AT, 1427126_AT, 1422943_A_AT, 1452388_AT, 1416455_A_AT, 1437122_AT, 1436332_AT	648	32	13588	3.93171	1	0.405493	25.636
GOTERM_BP_FAT	GO:0009266~response to temperature stimulus	7	0.687623	0.033274	1417013_AT, 1427126_AT, 1422943_A_AT, 1452388_AT, 1416455_A_AT, 1437122_AT, 1436332_AT, 1415984_AT	648	51	13588	2.87812	1	0.527935	44.8618
GOTERM_BP_FAT	GO:0009628~response to abiotic stimulus	17	1.66994	0.145404	1417013_AT, 1427126_AT, 1422943_A_AT, 1427465_AT, 1437122_AT, 1457218_AT, 1452388_AT, 1416999_AT, 1418142_AT, 1416967_AT, 1417622_AT, 1416455_A_AT, 1436332_AT, 1420772_A_AT, 1415984_AT, 1417193_AT, 1448416_AT, 1422627_A_AT	648	251	13588	1.42022	1	0.829115	93.6974
Annotation Cluster 35	Enrichment Score: 1.7171899454736803
Category	Term	Count	%	PValue	Genes	List Total	Pop Hits	Pop Total	Fold Enrichment	Bonferroni	Benjamini	FDR
GOTERM_MF_FAT	GO:0019887~protein kinase regulator activity	10	0.982318	0.0021486	1416034_AT, 1418497_AT, 1426640_S_AT, 1417649_AT, 1424470_A_AT, 1417635_AT, 1420858_AT, 1430640_A_AT, 1418003_AT, 1456609_AT	652	59	13288	3.4543	0.827117	0.0980927	3.25605
GOTERM_MF_FAT	GO:0019207~kinase regulator activity	10	0.982318	0.00906514	1416034_AT, 1418497_AT, 1426640_S_AT, 1417649_AT, 1424470_A_AT, 1417635_AT, 1420858_AT, 1430640_A_AT, 1418003_AT, 1456609_AT	652	73	13288	2.79183	0.999407	0.240593	13.0771
SP_PIR_KEYWORDS	protein kinase inhibitor	4	0.392927	0.0205477	1426640_S_AT, 1417649_AT, 1420858_AT, 1456609_AT	911	12	17854	6.53275	0.999918	0.241657	25.5338
GOTERM_MF_FAT	GO:0004860~protein kinase inhibitor activity	4	0.392927	0.0717782	1426640_S_AT, 1417649_AT, 1420858_AT, 1456609_AT	652	20	13288	4.07607	1	0.725603	68.2194
GOTERM_MF_FAT	GO:0019210~kinase inhibitor activity	4	0.392927	0.0903163	1426640_S_AT, 1417649_AT, 1420858_AT, 1456609_AT	652	22	13288	3.70552	1	0.760785	76.7017
Annotation Cluster 36	Enrichment Score: 1.7039301849329065
Category	Term	Count	%	PValue	Genes	List Total	Pop Hits	Pop Total	Fold Enrichment	Bonferroni	Benjamini	FDR
GOTERM_BP_FAT	GO:0007517~muscle organ development	17	1.66994	0.0099055	1430522_A_AT, 1417271_A_AT, 1417307_AT, 1424826_S_AT, 1448371_AT, 1425620_AT, 1423785_AT, 1421027_A_AT, 1450852_S_AT, 1448394_AT, 1418157_AT, 1416455_A_AT, 1427735_A_AT, 1415984_AT, 1423389_AT, 1451912_A_AT, 1416825_AT	648	176	13588	2.02543	1	0.319926	16.0651
GOTERM_BP_FAT	GO:0060537~muscle tissue development	14	1.37525	0.0129017	1417271_A_AT, 1430522_A_AT, 1417307_AT, 1448371_AT, 1425620_AT, 1423785_AT, 1421027_A_AT, 1450852_S_AT, 1448394_AT, 1418157_AT, 1427735_A_AT, 1415984_AT, 1423389_AT, 1416825_AT	648	136	13588	2.15859	1	0.356009	20.4232
GOTERM_BP_FAT	GO:0014706~striated muscle tissue development	13	1.27701	0.0179403	1430522_A_AT, 1417307_AT, 1448371_AT, 1425620_AT, 1423785_AT, 1421027_A_AT, 1450852_S_AT, 1448394_AT, 1418157_AT, 1427735_A_AT, 1415984_AT, 1423389_AT, 1416825_AT	648	127	13588	2.14645	1	0.42035	27.2744
GOTERM_BP_FAT	GO:0060538~skeletal muscle organ development	9	0.884086	0.0240371	1450852_S_AT, 1430522_A_AT, 1418157_AT, 1417307_AT, 1448371_AT, 1427735_A_AT, 1451912_A_AT, 1421027_A_AT, 1416825_AT	648	74	13588	2.5503	1	0.482959	34.821
GOTERM_BP_FAT	GO:0007519~skeletal muscle tissue development	8	0.785855	0.0548419	1450852_S_AT, 1430522_A_AT, 1418157_AT, 1417307_AT, 1448371_AT, 1427735_A_AT, 1421027_A_AT, 1416825_AT	648	72	13588	2.3299	1	0.636486	62.9262
Annotation Cluster 37	Enrichment Score: 1.6378575687050168
Category	Term	Count	%	PValue	Genes	List Total	Pop Hits	Pop Total	Fold Enrichment	Bonferroni	Benjamini	FDR
GOTERM_BP_FAT	GO:0060541~respiratory system development	14	1.37525	0.00612589	1428662_A_AT, 1423136_AT, 1416953_AT, 1418982_AT, 1416293_AT, 1435436_AT, 1449038_AT, 1422912_AT, 1434758_AT, 1416967_AT, 1425895_A_AT, 1437745_AT, 1448416_AT, 1451912_A_AT	648	124	13588	2.36748	1	0.250485	10.2462
GOTERM_BP_FAT	GO:0035295~tube development	21	2.06287	0.0275778	1428662_A_AT, 1417271_A_AT, 1417574_AT, 1423136_AT, 1416953_AT, 1433891_AT, 1418982_AT, 1416293_AT, 1437122_AT, 1435436_AT, 1449038_AT, 1428853_AT, 1415800_AT, 1422912_AT, 1434758_AT, 1434917_AT, 1417500_A_AT, 1419519_AT, 1425895_A_AT, 1448416_AT, 1419137_AT	648	264	13588	1.668	1	0.505127	38.8581
GOTERM_BP_FAT	GO:0030324~lung development	11	1.08055	0.0387271	1428662_A_AT, 1423136_AT, 1416953_AT, 1418982_AT, 1425895_A_AT, 1416293_AT, 1435436_AT, 1449038_AT, 1448416_AT, 1422912_AT, 1434758_AT	648	111	13588	2.07802	1	0.561194	50.0847
GOTERM_BP_FAT	GO:0030323~respiratory tube development	11	1.08055	0.0429364	1428662_A_AT, 1423136_AT, 1416953_AT, 1418982_AT, 1425895_A_AT, 1416293_AT, 1435436_AT, 1449038_AT, 1448416_AT, 1422912_AT, 1434758_AT	648	113	13588	2.04124	1	0.575416	53.7933
Annotation Cluster 38	Enrichment Score: 1.63584541202401
Category	Term	Count	%	PValue	Genes	List Total	Pop Hits	Pop Total	Fold Enrichment	Bonferroni	Benjamini	FDR
GOTERM_BP_FAT	GO:0045785~positive regulation of cell adhesion	8	0.785855	0.00387804	1416034_AT, 1448321_AT, 1424186_AT, 1416808_AT, 1417500_A_AT, 1422444_AT, 1427053_AT, 1449254_AT	648	43	13588	3.90123	0.999924	0.211025	6.60723
GOTERM_BP_FAT	GO:0030155~regulation of cell adhesion	12	1.17878	0.00498047	1416034_AT, 1448321_AT, 1424186_AT, 1425582_A_AT, 1416808_AT, 1417500_A_AT, 1422444_AT, 1427053_AT, 1437122_AT, 1418013_AT, 1426285_AT, 1449254_AT	648	94	13588	2.67691	0.999995	0.228336	8.40897
GOTERM_MF_FAT	GO:0050840~extracellular matrix binding	6	0.589391	0.0065229	1449368_AT, 1448321_AT, 1416808_AT, 1422444_AT, 1449254_AT, 1415871_AT	652	25	13288	4.89129	0.995205	0.192333	9.58103
GOTERM_BP_FAT	GO:0010811~positive regulation of cell-substrate adhesion	5	0.491159	0.0374187	1448321_AT, 1424186_AT, 1416808_AT, 1427053_AT, 1449254_AT	648	27	13588	3.88317	1	0.55477	48.8759
GOTERM_BP_FAT	GO:0010810~regulation of cell-substrate adhesion	6	0.589391	0.0400599	1448321_AT, 1424186_AT, 1416808_AT, 1427053_AT, 1437122_AT, 1449254_AT	648	40	13588	3.14537	1	0.567556	51.2883
GOTERM_BP_FAT	GO:0030198~extracellular matrix organization	9	0.884086	0.108239	1448321_AT, 1424186_AT, 1416808_AT, 1450843_A_AT, 1427053_AT, 1423606_AT, 1418511_AT, 1434758_AT, 1415871_AT	648	101	13588	1.86854	1	0.772122	86.6724
GOTERM_BP_FAT	GO:0043062~extracellular structure organization	11	1.08055	0.17321	1450852_S_AT, 1448321_AT, 1424186_AT, 1416808_AT, 1450843_A_AT, 1427053_AT, 1423606_AT, 1418511_AT, 1416825_AT, 1434758_AT, 1415871_AT	648	149	13588	1.54806	1	0.849574	96.478
Annotation Cluster 39	Enrichment Score: 1.5361201242518865
Category	Term	Count	%	PValue	Genes	List Total	Pop Hits	Pop Total	Fold Enrichment	Bonferroni	Benjamini	FDR
GOTERM_BP_FAT	GO:0006576~biogenic amine metabolic process	12	1.17878	0.00137535	1447863_S_AT, 1417639_AT, 1435436_AT, 1416023_AT, 1419039_AT, 1432372_A_AT, 1418701_AT, 1421260_A_AT, 1435446_A_AT, 1424268_AT, 1426146_A_AT, 1415984_AT, 1455435_S_AT	648	80	13588	3.14537	0.965201	0.109346	2.39215
GOTERM_BP_FAT	GO:0034311~diol metabolic process	5	0.491159	0.0522991	1447863_S_AT, 1435436_AT, 1419039_AT, 1418701_AT, 1432372_A_AT	648	30	13588	3.49486	1	0.629514	61.1318
GOTERM_BP_FAT	GO:0018958~phenol metabolic process	5	0.491159	0.0522991	1447863_S_AT, 1435436_AT, 1419039_AT, 1418701_AT, 1432372_A_AT	648	30	13588	3.49486	1	0.629514	61.1318
GOTERM_BP_FAT	GO:0006584~catecholamine metabolic process	5	0.491159	0.0522991	1447863_S_AT, 1435436_AT, 1419039_AT, 1418701_AT, 1432372_A_AT	648	30	13588	3.49486	1	0.629514	61.1318
GOTERM_BP_FAT	GO:0009712~catechol metabolic process	5	0.491159	0.0522991	1447863_S_AT, 1435436_AT, 1419039_AT, 1418701_AT, 1432372_A_AT	648	30	13588	3.49486	1	0.629514	61.1318
GOTERM_BP_FAT	GO:0042417~dopamine metabolic process	4	0.392927	0.0590048	1447863_S_AT, 1419039_AT, 1418701_AT, 1432372_A_AT	648	19	13588	4.41455	1	0.65353	65.6962
Annotation Cluster 40	Enrichment Score: 1.4921931769030328
Category	Term	Count	%	PValue	Genes	List Total	Pop Hits	Pop Total	Fold Enrichment	Bonferroni	Benjamini	FDR
UP_SEQ_FEATURE	metal ion-binding site:Magnesium or manganese	6	0.589391	0.00105606	1450048_A_AT, 1416788_A_AT, 1453139_AT, 1432332_A_AT, 1430896_S_AT, 1450111_A_AT	905	15	16021	7.0811	0.894996	0.245515	1.81367
INTERPRO	IPR000086:NUDIX hydrolase, core	5	0.491159	0.016831	1422816_A_AT, 1453139_AT, 1432332_A_AT, 1430896_S_AT, 1450111_A_AT	860	21	17763	4.91777	1	0.505611	24.2611
INTERPRO	IPR000086:NUDIX hydrolase domain	5	0.491159	0.0230771	1422816_A_AT, 1453139_AT, 1432332_A_AT, 1430896_S_AT, 1450111_A_AT	860	23	17763	4.49014	1	0.577373	31.7649
UP_SEQ_FEATURE	domain:Nudix hydrolase	5	0.491159	0.0434461	1422816_A_AT, 1453139_AT, 1432332_A_AT, 1430896_S_AT, 1450111_A_AT	905	24	16021	3.68808	1	0.957495	53.6724
UP_SEQ_FEATURE	short sequence motif:Nudix box	4	0.392927	0.088475	1453139_AT, 1432332_A_AT, 1430896_S_AT, 1450111_A_AT	905	19	16021	3.7269	1	0.993696	79.9048
GOTERM_MF_FAT	GO:0030145~manganese ion binding	12	1.17878	0.110604	1421097_AT, 1453139_AT, 1435699_AT, 1416383_A_AT, 1430896_S_AT, 1416632_AT, 1450111_A_AT, 1450048_A_AT, 1435446_A_AT, 1416788_A_AT, 1426146_A_AT, 1432332_A_AT, 1417193_AT	652	148	13288	1.65246	1	0.807768	83.5343
SP_PIR_KEYWORDS	manganese	11	1.08055	0.20565	1450048_A_AT, 1421097_AT, 1435446_A_AT, 1435699_AT, 1416788_A_AT, 1453139_AT, 1426146_A_AT, 1416383_A_AT, 1417193_AT, 1432332_A_AT, 1430896_S_AT, 1450111_A_AT	911	145	17854	1.48676	1	0.751073	96.197
Annotation Cluster 41	Enrichment Score: 1.4906327604720218
Category	Term	Count	%	PValue	Genes	List Total	Pop Hits	Pop Total	Fold Enrichment	Bonferroni	Benjamini	FDR
GOTERM_BP_FAT	GO:0042325~regulation of phosphorylation	26	2.55403	0.00307315	1448724_AT, 1416330_AT, 1423136_AT, 1426850_A_AT, 1417962_S_AT, 1417184_S_AT, 1417649_AT, 1418086_AT, 1426319_AT, 1420858_AT, 1417900_A_AT, 1427040_AT, 1453851_A_AT, 1426640_S_AT, 1424470_A_AT, 1423062_AT, 1437122_AT, 1452398_AT, 1422912_AT, 1450852_S_AT, 1416034_AT, 1421340_AT, 1423135_AT, 1430640_A_AT, 1427329_A_AT, 1423104_AT	648	290	13588	1.87999	0.999452	0.18829	5.27072
GOTERM_BP_FAT	GO:0019220~regulation of phosphate metabolic process	26	2.55403	0.00495826	1448724_AT, 1416330_AT, 1423136_AT, 1426850_A_AT, 1417962_S_AT, 1417184_S_AT, 1417649_AT, 1418086_AT, 1426319_AT, 1420858_AT, 1417900_A_AT, 1427040_AT, 1453851_A_AT, 1426640_S_AT, 1424470_A_AT, 1423062_AT, 1437122_AT, 1452398_AT, 1422912_AT, 1450852_S_AT, 1416034_AT, 1421340_AT, 1423135_AT, 1430640_A_AT, 1427329_A_AT, 1423104_AT	648	301	13588	1.81129	0.999995	0.231763	8.37299
GOTERM_BP_FAT	GO:0051174~regulation of phosphorus metabolic process	26	2.55403	0.00495826	1448724_AT, 1416330_AT, 1423136_AT, 1426850_A_AT, 1417962_S_AT, 1417184_S_AT, 1417649_AT, 1418086_AT, 1426319_AT, 1420858_AT, 1417900_A_AT, 1427040_AT, 1453851_A_AT, 1426640_S_AT, 1424470_A_AT, 1423062_AT, 1437122_AT, 1452398_AT, 1422912_AT, 1450852_S_AT, 1416034_AT, 1421340_AT, 1423135_AT, 1430640_A_AT, 1427329_A_AT, 1423104_AT	648	301	13588	1.81129	0.999995	0.231763	8.37299
GOTERM_BP_FAT	GO:0043085~positive regulation of catalytic activity	22	2.1611	0.0133253	1447863_S_AT, 1453851_A_AT, 1448724_AT, 1416330_AT, 1431798_A_AT, 1426850_A_AT, 1437122_AT, 1452398_AT, 1418128_AT, 1434382_AT, 1450852_S_AT, 1416034_AT, 1417500_A_AT, 1421340_AT, 1417092_AT, 1460718_S_AT, 1423135_AT, 1427329_A_AT, 1417900_A_AT, 1438936_S_AT, 1423104_AT, 1427040_AT	648	261	13588	1.76751	1	0.353662	21.0219
GOTERM_BP_FAT	GO:0000165~MAPKKK cascade	12	1.17878	0.0198776	1453851_A_AT, 1450852_S_AT, 1416330_AT, 1418497_AT, 1426850_A_AT, 1421340_AT, 1435699_AT, 1435272_AT, 1452398_AT, 1419137_AT, 1427329_A_AT, 1427040_AT	648	114	13588	2.20728	1	0.445805	29.7574
GOTERM_BP_FAT	GO:0044093~positive regulation of molecular function	24	2.35756	0.0208086	1447863_S_AT, 1453851_A_AT, 1448724_AT, 1416330_AT, 1431798_A_AT, 1426850_A_AT, 1437122_AT, 1452398_AT, 1425620_AT, 1418128_AT, 1434382_AT, 1450852_S_AT, 1416034_AT, 1417500_A_AT, 1421340_AT, 1417092_AT, 1460718_S_AT, 1423135_AT, 1427329_A_AT, 1416429_A_AT, 1417900_A_AT, 1438936_S_AT, 1423104_AT, 1427040_AT	648	306	13588	1.64464	1	0.449327	30.922
GOTERM_BP_FAT	GO:0051347~positive regulation of transferase activity	13	1.27701	0.0274843	1453851_A_AT, 1416330_AT, 1448724_AT, 1426850_A_AT, 1452398_AT, 1434382_AT, 1416034_AT, 1450852_S_AT, 1421340_AT, 1427329_A_AT, 1417900_A_AT, 1423104_AT, 1427040_AT	648	135	13588	2.01925	1	0.507539	38.7546
GOTERM_BP_FAT	GO:0033674~positive regulation of kinase activity	12	1.17878	0.0458658	1453851_A_AT, 1416034_AT, 1450852_S_AT, 1448724_AT, 1416330_AT, 1426850_A_AT, 1421340_AT, 1452398_AT, 1427329_A_AT, 1417900_A_AT, 1423104_AT, 1427040_AT	648	130	13588	1.93561	1	0.591393	56.2192
GOTERM_BP_FAT	GO:0051338~regulation of transferase activity	16	1.57171	0.0531166	1453851_A_AT, 1448724_AT, 1416330_AT, 1426640_S_AT, 1426850_A_AT, 1452398_AT, 1434382_AT, 1416034_AT, 1450852_S_AT, 1421340_AT, 1420858_AT, 1423135_AT, 1427329_A_AT, 1417900_A_AT, 1423104_AT, 1427040_AT	648	199	13588	1.68596	1	0.629844	61.7174
GOTERM_BP_FAT	GO:0043406~positive regulation of MAP kinase activity	7	0.687623	0.0608168	1416034_AT, 1416330_AT, 1426850_A_AT, 1421340_AT, 1452398_AT, 1427329_A_AT, 1427040_AT	648	59	13588	2.48786	1	0.659775	66.8399
GOTERM_BP_FAT	GO:0045860~positive regulation of protein kinase activity	11	1.08055	0.0716393	1453851_A_AT, 1416034_AT, 1450852_S_AT, 1448724_AT, 1416330_AT, 1426850_A_AT, 1421340_AT, 1452398_AT, 1427329_A_AT, 1417900_A_AT, 1427040_AT	648	124	13588	1.86017	1	0.689688	72.9565
GOTERM_BP_FAT	GO:0043549~regulation of kinase activity	15	1.47348	0.0747691	1453851_A_AT, 1448724_AT, 1426640_S_AT, 1416330_AT, 1426850_A_AT, 1452398_AT, 1416034_AT, 1450852_S_AT, 1421340_AT, 1420858_AT, 1423135_AT, 1427329_A_AT, 1417900_A_AT, 1423104_AT, 1427040_AT	648	192	13588	1.63821	1	0.698839	74.5163
GOTERM_BP_FAT	GO:0000187~activation of MAPK activity	6	0.589391	0.0881636	1416330_AT, 1426850_A_AT, 1421340_AT, 1452398_AT, 1427329_A_AT, 1427040_AT	648	50	13588	2.5163	1	0.734117	80.2827
GOTERM_BP_FAT	GO:0043405~regulation of MAP kinase activity	8	0.785855	0.104867	1416034_AT, 1416330_AT, 1426640_S_AT, 1426850_A_AT, 1421340_AT, 1452398_AT, 1427329_A_AT, 1427040_AT	648	84	13588	1.99706	1	0.766198	85.7573
GOTERM_BP_FAT	GO:0045859~regulation of protein kinase activity	14	1.37525	0.107202	1453851_A_AT, 1448724_AT, 1426640_S_AT, 1416330_AT, 1426850_A_AT, 1452398_AT, 1416034_AT, 1450852_S_AT, 1421340_AT, 1420858_AT, 1423135_AT, 1427329_A_AT, 1417900_A_AT, 1427040_AT	648	186	13588	1.57832	1	0.770471	86.397
GOTERM_BP_FAT	GO:0007243~protein kinase cascade	16	1.57171	0.156861	1453851_A_AT, 1416330_AT, 1426850_A_AT, 1435699_AT, 1435272_AT, 1452398_AT, 1450852_S_AT, 1418497_AT, 1416999_AT, 1421340_AT, 1423452_AT, 1449041_A_AT, 1427329_A_AT, 1419137_AT, 1423104_AT, 1427040_AT	648	236	13588	1.42164	1	0.838939	95.0296
Annotation Cluster 42	Enrichment Score: 1.471601252306428
Category	Term	Count	%	PValue	Genes	List Total	Pop Hits	Pop Total	Fold Enrichment	Bonferroni	Benjamini	FDR
GOTERM_BP_FAT	GO:0055080~cation homeostasis	18	1.76817	0.00684278	1425546_A_AT, 1421225_A_AT, 1415923_AT, 1423594_A_AT, 1427465_AT, 1432466_A_AT, 1437122_AT, 1450852_S_AT, 1416034_AT, 1422645_AT, 1417500_A_AT, 1424308_AT, 1417092_AT, 1427282_A_AT, 1417193_AT, 1428898_AT, 1448602_AT, 1416041_AT	648	184	13588	2.05133	1	0.262592	11.3784
GOTERM_BP_FAT	GO:0055066~di-, tri-valent inorganic cation homeostasis	15	1.47348	0.00983836	1425546_A_AT, 1415923_AT, 1427465_AT, 1432466_A_AT, 1437122_AT, 1450852_S_AT, 1416034_AT, 1422645_AT, 1417500_A_AT, 1424308_AT, 1417092_AT, 1427282_A_AT, 1417193_AT, 1428898_AT, 1448602_AT	648	146	13588	2.15436	1	0.322337	15.965
GOTERM_BP_FAT	GO:0006875~cellular metal ion homeostasis	11	1.08055	0.020574	1416034_AT, 1450852_S_AT, 1417500_A_AT, 1415923_AT, 1424308_AT, 1417092_AT, 1427465_AT, 1432466_A_AT, 1437122_AT, 1448602_AT, 1416041_AT	648	100	13588	2.3066	1	0.449405	30.6303
GOTERM_BP_FAT	GO:0030005~cellular di-, tri-valent inorganic cation homeostasis	13	1.27701	0.0261239	1425546_A_AT, 1415923_AT, 1427465_AT, 1432466_A_AT, 1437122_AT, 1416034_AT, 1450852_S_AT, 1417500_A_AT, 1424308_AT, 1417092_AT, 1427282_A_AT, 1428898_AT, 1448602_AT	648	134	13588	2.03432	1	0.500682	37.2297
GOTERM_BP_FAT	GO:0006874~cellular calcium ion homeostasis	10	0.982318	0.0289981	1416034_AT, 1450852_S_AT, 1417500_A_AT, 1415923_AT, 1424308_AT, 1417092_AT, 1427465_AT, 1432466_A_AT, 1437122_AT, 1448602_AT	648	91	13588	2.3043	1	0.519375	40.4102
GOTERM_BP_FAT	GO:0055065~metal ion homeostasis	11	1.08055	0.0294687	1416034_AT, 1450852_S_AT, 1417500_A_AT, 1415923_AT, 1424308_AT, 1417092_AT, 1427465_AT, 1432466_A_AT, 1437122_AT, 1448602_AT, 1416041_AT	648	106	13588	2.17604	1	0.518015	40.9162
GOTERM_BP_FAT	GO:0030003~cellular cation homeostasis	14	1.37525	0.0295023	1425546_A_AT, 1415923_AT, 1427465_AT, 1432466_A_AT, 1437122_AT, 1416034_AT, 1450852_S_AT, 1417500_A_AT, 1424308_AT, 1417092_AT, 1427282_A_AT, 1428898_AT, 1448602_AT, 1416041_AT	648	152	13588	1.93137	1	0.514926	40.9523
GOTERM_BP_FAT	GO:0042592~homeostatic process	39	3.83104	0.0320338	1429735_AT, 1427126_AT, 1421225_A_AT, 1417714_X_AT, 1417307_AT, 1430135_AT, 1427465_AT, 1432466_A_AT, 1426018_A_AT, 1422645_AT, 1424308_AT, 1416521_AT, 1427282_A_AT, 1422470_AT, 1423389_AT, 1417193_AT, 1448602_AT, 1416041_AT, 1425546_A_AT, 1416526_A_AT, 1415923_AT, 1423594_A_AT, 1416528_AT, 1437122_AT, 1425620_AT, 1435436_AT, 1448696_AT, 1428853_AT, 1433694_AT, 1422912_AT, 1436349_AT, 1417956_AT,…	648	584	13588	1.40034	1	0.520769	43.604
GOTERM_BP_FAT	GO:0055074~calcium ion homeostasis	10	0.982318	0.0368628	1416034_AT, 1450852_S_AT, 1417500_A_AT, 1415923_AT, 1424308_AT, 1417092_AT, 1427465_AT, 1432466_A_AT, 1437122_AT, 1448602_AT	648	95	13588	2.20728	1	0.555594	48.3539
GOTERM_BP_FAT	GO:0050801~ion homeostasis	22	2.1611	0.0409676	1425546_A_AT, 1429735_AT, 1416526_A_AT, 1421225_A_AT, 1415923_AT, 1423594_A_AT, 1427465_AT, 1432466_A_AT, 1437122_AT, 1450852_S_AT, 1416034_AT, 1422645_AT, 1417500_A_AT, 1424308_AT, 1417092_AT, 1427282_A_AT, 1423389_AT, 1422470_AT, 1417193_AT, 1428898_AT, 1448602_AT, 1416041_AT	648	293	13588	1.57447	1	0.569808	52.0923
GOTERM_BP_FAT	GO:0048878~chemical homeostasis	26	2.55403	0.0437288	1429735_AT, 1421225_A_AT, 1427465_AT, 1432466_A_AT, 1422645_AT, 1424308_AT, 1427282_A_AT, 1422470_AT, 1423389_AT, 1417193_AT, 1448602_AT, 1416041_AT, 1425546_A_AT, 1416526_A_AT, 1415923_AT, 1423594_A_AT, 1437122_AT, 1435436_AT, 1428853_AT, 1433694_AT, 1450852_S_AT, 1416034_AT, 1417500_A_AT, 1419519_AT, 1417092_AT, 1428898_AT	648	365	13588	1.49369	1	0.579321	54.4617
GOTERM_BP_FAT	GO:0019725~cellular homeostasis	24	2.35756	0.0622666	1425546_A_AT, 1429735_AT, 1416526_A_AT, 1415923_AT, 1417307_AT, 1416528_AT, 1427465_AT, 1432466_A_AT, 1437122_AT, 1436349_AT, 1450852_S_AT, 1416034_AT, 1417500_A_AT, 1424308_AT, 1417092_AT, 1417622_AT, 1416521_AT, 1427282_A_AT, 1423389_AT, 1422470_AT, 1417193_AT, 1428898_AT, 1448602_AT, 1416041_AT	648	343	13588	1.46723	1	0.661028	67.729
GOTERM_BP_FAT	GO:0006873~cellular ion homeostasis	19	1.8664	0.0741086	1425546_A_AT, 1429735_AT, 1416526_A_AT, 1415923_AT, 1427465_AT, 1432466_A_AT, 1437122_AT, 1450852_S_AT, 1416034_AT, 1417500_A_AT, 1424308_AT, 1417092_AT, 1427282_A_AT, 1423389_AT, 1422470_AT, 1417193_AT, 1428898_AT, 1448602_AT, 1416041_AT	648	261	13588	1.52649	1	0.697798	74.1943
GOTERM_BP_FAT	GO:0055082~cellular chemical homeostasis	19	1.8664	0.0900439	1425546_A_AT, 1429735_AT, 1416526_A_AT, 1415923_AT, 1427465_AT, 1432466_A_AT, 1437122_AT, 1450852_S_AT, 1416034_AT, 1417500_A_AT, 1424308_AT, 1417092_AT, 1427282_A_AT, 1423389_AT, 1422470_AT, 1417193_AT, 1428898_AT, 1448602_AT, 1416041_AT	648	268	13588	1.48662	1	0.735745	80.9859
GOTERM_BP_FAT	GO:0051480~cytosolic calcium ion homeostasis	5	0.491159	0.105172	1416034_AT, 1450852_S_AT, 1417500_A_AT, 1417092_AT, 1427465_AT	648	38	13588	2.7591	1	0.765419	85.8424
Annotation Cluster 43	Enrichment Score: 1.4554822794234321
Category	Term	Count	%	PValue	Genes	List Total	Pop Hits	Pop Total	Fold Enrichment	Bonferroni	Benjamini	FDR
INTERPRO	IPR000647:CTF transcription factor/nuclear factor 1	3	0.294695	0.0131306	1438236_AT, 1416293_AT, 1421162_A_AT, 1423493_A_AT	860	4	17763	15.491	1	0.454074	19.4569
INTERPRO	IPR019739:CTF transcription factor/nuclear factor 1, conserved site	3	0.294695	0.0131306	1438236_AT, 1416293_AT, 1421162_A_AT, 1423493_A_AT	860	4	17763	15.491	1	0.454074	19.4569
INTERPRO	IPR019548:CTF transcription factor/nuclear factor 1, N-terminal	3	0.294695	0.0131306	1438236_AT, 1416293_AT, 1421162_A_AT, 1423493_A_AT	860	4	17763	15.491	1	0.454074	19.4569
SMART	SM00523:DWA	4	0.392927	0.0132935	1438236_AT, 1416293_AT, 1423389_AT, 1421162_A_AT, 1423493_A_AT	397	12	9131	7.66667	0.9527	0.398627	15.7458
UP_SEQ_FEATURE	DNA-binding region:CTF/NF-I	3	0.294695	0.0176809	1438236_AT, 1416293_AT, 1421162_A_AT, 1423493_A_AT	905	4	16021	13.2771	1	0.836663	26.5831
INTERPRO	IPR003619:MAD homology 1, Dwarfin-type	4	0.392927	0.0178635	1438236_AT, 1416293_AT, 1423389_AT, 1421162_A_AT, 1423493_A_AT	860	12	17763	6.88488	1	0.515855	25.5527
PIR_SUPERFAMILY	PIRSF018476:nuclear factor 1	3	0.294695	0.0178824	1438236_AT, 1416293_AT, 1421162_A_AT, 1423493_A_AT	463	4	8136	13.1793	0.99989	0.838374	22.9109
SP_PIR_KEYWORDS	dna replication	5	0.491159	0.63541	1448277_AT, 1438236_AT, 1416293_AT, 1416214_AT, 1421162_A_AT, 1423493_A_AT	911	85	17854	1.15284	1	0.974929	99.9999
GOTERM_BP_FAT	GO:0006260~DNA replication	7	0.687623	0.736581	1448277_AT, 1438236_AT, 1416953_AT, 1416293_AT, 1416214_AT, 1417053_AT, 1421162_A_AT, 1423493_A_AT	648	152	13588	0.965684	1	0.998943	100
Annotation Cluster 44	Enrichment Score: 1.455084719266208
Category	Term	Count	%	PValue	Genes	List Total	Pop Hits	Pop Total	Fold Enrichment	Bonferroni	Benjamini	FDR
GOTERM_CC_FAT	GO:0044438~microbody part	6	0.589391	0.0245886	1424912_AT, 1422780_AT, 1416679_AT, 1416429_A_AT, 1431012_A_AT, 1416408_AT	681	31	12504	3.55379	0.999907	0.251881	29.0871
GOTERM_CC_FAT	GO:0044439~peroxisomal part	6	0.589391	0.0245886	1424912_AT, 1422780_AT, 1416679_AT, 1416429_A_AT, 1431012_A_AT, 1416408_AT	681	31	12504	3.55379	0.999907	0.251881	29.0871
GOTERM_CC_FAT	GO:0031903~microbody membrane	5	0.491159	0.0500146	1424912_AT, 1422780_AT, 1416679_AT, 1416429_A_AT, 1416408_AT	681	26	12504	3.53101	1	0.372984	50.7556
GOTERM_CC_FAT	GO:0005778~peroxisomal membrane	5	0.491159	0.0500146	1424912_AT, 1422780_AT, 1416679_AT, 1416429_A_AT, 1416408_AT	681	26	12504	3.53101	1	0.372984	50.7556
Annotation Cluster 45	Enrichment Score: 1.4220664560284366
Category	Term	Count	%	PValue	Genes	List Total	Pop Hits	Pop Total	Fold Enrichment	Bonferroni	Benjamini	FDR
SMART	SM00233:PH	21	2.06287	0.00956092	1453638_AT, 1426743_AT, 1434180_AT, 1424671_AT, 1425457_A_AT, 1416178_A_AT, 1429012_AT, 1454862_AT, 1449002_AT, 1424842_A_AT, 1434140_AT, 1436197_AT, 1422673_AT, 1444028_S_AT, 1460578_AT, 1425391_A_AT, 1452281_AT, 1451499_AT, 1416825_AT, 1423104_AT, 1454727_AT	397	261	9131	1.85057	0.888126	0.354723	11.573
INTERPRO	IPR001849:Pleckstrin homology	21	2.06287	0.0288967	1453638_AT, 1426743_AT, 1434180_AT, 1424671_AT, 1425457_A_AT, 1416178_A_AT, 1429012_AT, 1454862_AT, 1449002_AT, 1424842_A_AT, 1434140_AT, 1436197_AT, 1422673_AT, 1444028_S_AT, 1460578_AT, 1425391_A_AT, 1452281_AT, 1451499_AT, 1416825_AT, 1423104_AT, 1454727_AT	860	261	17763	1.66187	1	0.650914	38.1231
INTERPRO	IPR011993:Pleckstrin homology-type	21	2.06287	0.0689718	1426743_AT, 1434180_AT, 1424092_AT, 1424671_AT, 1425457_A_AT, 1416178_A_AT, 1455450_AT, 1454862_AT, 1424842_A_AT, 1434140_AT, 1436197_AT, 1422673_AT, 1444028_S_AT, 1460578_AT, 1425391_A_AT, 1452281_AT, 1421814_AT, 1423104_AT, 1451499_AT, 1454727_AT, 1424367_A_AT	860	289	17763	1.50086	1	0.850151	68.9612
UP_SEQ_FEATURE	domain:PH	17	1.66994	0.107576	1426743_AT, 1434180_AT, 1424671_AT, 1416178_A_AT, 1425457_A_AT, 1429012_AT, 1449002_AT, 1454862_AT, 1424842_A_AT, 1434140_AT, 1436197_AT, 1422673_AT, 1444028_S_AT, 1425391_A_AT, 1452281_AT, 1423104_AT, 1451499_AT	905	202	16021	1.48984	1	0.996912	86.0757
Annotation Cluster 46	Enrichment Score: 1.4126000233192333
Category	Term	Count	%	PValue	Genes	List Total	Pop Hits	Pop Total	Fold Enrichment	Bonferroni	Benjamini	FDR
GOTERM_BP_FAT	GO:0034637~cellular carbohydrate biosynthetic process	9	0.884086	0.00475835	1416204_AT, 1425631_AT, 1448429_AT, 1429083_AT, 1426514_AT, 1416383_A_AT, 1420654_A_AT, 1424167_A_AT, 1428245_AT	648	56	13588	3.37004	0.999991	0.232412	8.0486
GOTERM_BP_FAT	GO:0016051~carbohydrate biosynthetic process	11	1.08055	0.00590966	1416104_AT, 1416204_AT, 1425631_AT, 1448429_AT, 1429083_AT, 1426514_AT, 1416383_A_AT, 1438566_AT, 1420654_A_AT, 1424167_A_AT, 1428245_AT	648	83	13588	2.77904	0.999999	0.246914	9.90206
GOTERM_BP_FAT	GO:0019319~hexose biosynthetic process	5	0.491159	0.0290512	1416204_AT, 1426514_AT, 1416383_A_AT, 1424167_A_AT, 1428245_AT	648	25	13588	4.19383	1	0.516457	40.4675
GOTERM_BP_FAT	GO:0046364~monosaccharide biosynthetic process	5	0.491159	0.0578775	1416204_AT, 1426514_AT, 1416383_A_AT, 1424167_A_AT, 1428245_AT	648	31	13588	3.38212	1	0.648858	64.966
GOTERM_BP_FAT	GO:0046165~alcohol biosynthetic process	5	0.491159	0.0975747	1416204_AT, 1426514_AT, 1416383_A_AT, 1424167_A_AT, 1428245_AT	648	37	13588	2.83367	1	0.749439	83.5721
GOTERM_BP_FAT	GO:0006090~pyruvate metabolic process	4	0.392927	0.113904	1416204_AT, 1417273_AT, 1416383_A_AT, 1428245_AT	648	25	13588	3.35506	1	0.778084	88.0858
GOTERM_BP_FAT	GO:0006094~gluconeogenesis	3	0.294695	0.246168	1416204_AT, 1416383_A_AT, 1428245_AT	648	20	13588	3.14537	1	0.914781	99.3066
Annotation Cluster 47	Enrichment Score: 1.4102754429964905
Category	Term	Count	%	PValue	Genes	List Total	Pop Hits	Pop Total	Fold Enrichment	Bonferroni	Benjamini	FDR
GOTERM_BP_FAT	GO:0030036~actin cytoskeleton organization	17	1.66994	0.005424	1424826_S_AT, 1424092_AT, 1418209_A_AT, 1418288_AT, 1415812_AT, 1437122_AT, 1418551_AT, 1448394_AT, 1435551_AT, 1436197_AT, 1455213_AT, 1418892_AT, 1457465_AT, 1427735_A_AT, 1427918_A_AT, 1438936_S_AT, 1426724_AT	648	165	13588	2.16046	0.999998	0.23311	9.12455
GOTERM_BP_FAT	GO:0030029~actin filament-based process	17	1.66994	0.0099055	1424826_S_AT, 1424092_AT, 1418209_A_AT, 1418288_AT, 1415812_AT, 1437122_AT, 1418551_AT, 1448394_AT, 1435551_AT, 1436197_AT, 1455213_AT, 1418892_AT, 1457465_AT, 1427735_A_AT, 1427918_A_AT, 1438936_S_AT, 1426724_AT	648	176	13588	2.02543	1	0.319926	16.0651
GOTERM_BP_FAT	GO:0007010~cytoskeleton organization	26	2.55403	0.0131037	1424826_S_AT, 1424092_AT, 1418551_AT, 1435551_AT, 1436197_AT, 1448394_AT, 1418892_AT, 1453103_AT, 1416713_AT, 1438018_AT, 1427918_A_AT, 1442376_AT, 1426724_AT, 1425745_A_AT, 1418986_A_AT, 1418209_A_AT, 1418288_AT, 1415812_AT, 1437122_AT, 1455213_AT, 1460694_S_AT, 1457465_AT, 1455558_AT, 1427735_A_AT, 1423135_AT, 1419667_AT, 1438936_S_AT	648	326	13588	1.67239	1	0.35653	20.7091
GOTERM_MF_FAT	GO:0008092~cytoskeletal protein binding	28	2.75049	0.0782667	1455610_AT, 1417307_AT, 1424826_S_AT, 1424092_AT, 1416995_AT, 1455450_AT, 1418551_AT, 1435551_AT, 1453103_AT, 1416713_AT, 1452879_AT, 1421814_AT, 1438018_AT, 1442376_AT, 1426724_AT, 1424367_A_AT, 1415923_AT, 1418986_A_AT, 1435649_AT, 1418209_A_AT, 1415812_AT, 1455056_AT, 1428650_AT, 1455213_AT, 1460694_S_AT, 1457465_AT, 1451290_AT, 1438936_S_AT, 1416825_AT	652	414	13288	1.37838	1	0.742623	71.4716
GOTERM_MF_FAT	GO:0003779~actin binding	19	1.8664	0.170655	1417307_AT, 1435649_AT, 1424826_S_AT, 1424092_AT, 1418209_A_AT, 1415812_AT, 1428650_AT, 1418551_AT, 1435551_AT, 1455213_AT, 1453103_AT, 1457465_AT, 1460694_S_AT, 1452879_AT, 1438018_AT, 1438936_S_AT, 1416825_AT, 1442376_AT, 1426724_AT, 1424367_A_AT	652	288	13288	1.34454	1	0.88005	94.3851
SP_PIR_KEYWORDS	actin-binding	14	1.37525	0.367336	1435649_AT, 1417307_AT, 1424826_S_AT, 1424092_AT, 1418209_A_AT, 1415812_AT, 1418551_AT, 1435551_AT, 1453103_AT, 1457465_AT, 1460694_S_AT, 1452879_AT, 1416825_AT, 1442376_AT, 1426724_AT	911	226	17854	1.21405	1	0.879515	99.8498
Annotation Cluster 48	Enrichment Score: 1.345775200231141
Category	Term	Count	%	PValue	Genes	List Total	Pop Hits	Pop Total	Fold Enrichment	Bonferroni	Benjamini	FDR
UP_SEQ_FEATURE	metal ion-binding site:Magnesium or manganese	6	0.589391	0.00105606	1450048_A_AT, 1416788_A_AT, 1453139_AT, 1432332_A_AT, 1430896_S_AT, 1450111_A_AT	905	15	16021	7.0811	0.894996	0.245515	1.81367
GOTERM_BP_FAT	GO:0006084~acetyl-CoA metabolic process	7	0.687623	0.00302246	1450048_A_AT, 1422478_A_AT, 1416788_A_AT, 1417273_AT, 1449964_A_AT, 1416617_AT, 1430896_S_AT	648	31	13588	4.73497	0.99938	0.190248	5.18595
GOTERM_BP_FAT	GO:0046356~acetyl-CoA catabolic process	3	0.294695	0.317851	1450048_A_AT, 1416788_A_AT, 1430896_S_AT	648	24	13588	2.62114	1	0.949301	99.8804
GOTERM_BP_FAT	GO:0009109~coenzyme catabolic process	3	0.294695	0.404872	1450048_A_AT, 1416788_A_AT, 1430896_S_AT	648	29	13588	2.16922	1	0.974806	99.9892
GOTERM_BP_FAT	GO:0051187~cofactor catabolic process	3	0.294695	0.454501	1450048_A_AT, 1416788_A_AT, 1430896_S_AT	648	32	13588	1.96586	1	0.983366	99.9977
Annotation Cluster 49	Enrichment Score: 1.344995006605107
Category	Term	Count	%	PValue	Genes	List Total	Pop Hits	Pop Total	Fold Enrichment	Bonferroni	Benjamini	FDR
GOTERM_BP_FAT	GO:0031589~cell-substrate adhesion	9	0.884086	0.0053102	1416808_AT, 1422444_AT, 1416953_AT, 1437122_AT, 1435603_AT, 1423135_AT, 1417533_A_AT, 1418788_AT, 1418571_AT	648	57	13588	3.31092	0.999998	0.232894	8.94145
GOTERM_BP_FAT	GO:0007160~cell-matrix adhesion	8	0.785855	0.00902868	1416808_AT, 1422444_AT, 1416953_AT, 1437122_AT, 1435603_AT, 1423135_AT, 1417533_A_AT, 1418788_AT	648	50	13588	3.35506	1	0.30846	14.7478
GOTERM_MF_FAT	GO:0032403~protein complex binding	9	0.884086	0.0366684	1455610_AT, 1420911_A_AT, 1422444_AT, 1416953_AT, 1416647_AT, 1416978_AT, 1425457_A_AT, 1417533_A_AT, 1423104_AT	652	78	13288	2.35158	1	0.561276	43.7257
GOTERM_MF_FAT	GO:0005178~integrin binding	4	0.392927	0.121356	1420911_A_AT, 1422444_AT, 1416953_AT, 1417533_A_AT	652	25	13288	3.26086	1	0.812828	86.3454
GOTERM_BP_FAT	GO:0007229~integrin-mediated signaling pathway	3	0.294695	0.882948	1422444_AT, 1416953_AT, 1417533_A_AT	648	76	13588	0.827729	1	0.999935	100
Annotation Cluster 50	Enrichment Score: 1.294142335154519
Category	Term	Count	%	PValue	Genes	List Total	Pop Hits	Pop Total	Fold Enrichment	Bonferroni	Benjamini	FDR
SMART	SM00228:PDZ	13	1.27701	0.0270853	1435175_AT, 1419292_AT, 1442823_AT, 1416749_AT, 1417928_AT, 1455056_AT, 1455450_AT, 1416846_A_AT, 1428622_AT, 1457465_AT, 1452879_AT, 1419137_AT, 1416825_AT	397	148	9131	2.02027	0.99809	0.542775	29.6399
INTERPRO	IPR001478:PDZ/DHR/GLGF	13	1.27701	0.0553456	1435175_AT, 1419292_AT, 1442823_AT, 1416749_AT, 1417928_AT, 1455056_AT, 1455450_AT, 1416846_A_AT, 1428622_AT, 1457465_AT, 1452879_AT, 1419137_AT, 1416825_AT	860	148	17763	1.81426	1	0.799862	60.6264
UP_SEQ_FEATURE	domain:PDZ	10	0.982318	0.0874491	1419292_AT, 1428622_AT, 1442823_AT, 1457465_AT, 1416749_AT, 1417928_AT, 1452879_AT, 1419137_AT, 1455450_AT, 1416825_AT	905	95	16021	1.86345	1	0.994123	79.5093
Annotation Cluster 51	Enrichment Score: 1.2304908162302994
Category	Term	Count	%	PValue	Genes	List Total	Pop Hits	Pop Total	Fold Enrichment	Bonferroni	Benjamini	FDR
GOTERM_BP_FAT	GO:0018106~peptidyl-histidine phosphorylation	3	0.294695	0.0205649	1460644_AT, 1417273_AT, 1448825_AT	648	5	13588	12.5815	1	0.453155	30.6189
INTERPRO	IPR018955:Branched-chain alpha-ketoacid dehydrogenase kinase/Pyruvate dehydrogenase kinase, mitochondrial	3	0.294695	0.0211861	1460644_AT, 1417273_AT, 1448825_AT	860	5	17763	12.3928	1	0.566731	29.5702
INTERPRO	IPR005467:Signal transduction histidine kinase, core	3	0.294695	0.0211861	1460644_AT, 1417273_AT, 1448825_AT	860	5	17763	12.3928	1	0.566731	29.5702
UP_SEQ_FEATURE	domain:Histidine kinase	3	0.294695	0.0283726	1460644_AT, 1417273_AT, 1448825_AT	905	5	16021	10.6217	1	0.905703	39.2614
PIR_SUPERFAMILY	PIRSF000718:branched-chain alpha-keto acid dehydrogenase kinase	3	0.294695	0.0286912	1460644_AT, 1417273_AT, 1448825_AT	463	5	8136	10.5434	1	0.913721	34.2819
GOTERM_BP_FAT	GO:0018202~peptidyl-histidine modification	3	0.294695	0.0405335	1460644_AT, 1417273_AT, 1448825_AT	648	7	13588	8.98677	1	0.568872	51.7093
GOTERM_MF_FAT	GO:0004673~protein histidine kinase activity	3	0.294695	0.0983519	1460644_AT, 1417273_AT, 1448825_AT	652	11	13288	5.55828	1	0.778779	79.6754
GOTERM_MF_FAT	GO:0000155~two-component sensor activity	3	0.294695	0.0983519	1460644_AT, 1417273_AT, 1448825_AT	652	11	13288	5.55828	1	0.778779	79.6754
GOTERM_MF_FAT	GO:0016775~phosphotransferase activity, nitrogenous group as acceptor	3	0.294695	0.183297	1460644_AT, 1417273_AT, 1448825_AT	652	16	13288	3.82132	1	0.895997	95.5673
SMART	SM00387:HATPase_c	3	0.294695	0.21438	1460644_AT, 1417273_AT, 1448825_AT	397	20	9131	3.45	1	0.908538	95.4453
INTERPRO	IPR003594:ATP-binding region, ATPase-like	3	0.294695	0.251771	1460644_AT, 1417273_AT, 1448825_AT	860	20	17763	3.0982	1	0.990349	99.1333
Annotation Cluster 52	Enrichment Score: 1.2188182057092427
Category	Term	Count	%	PValue	Genes	List Total	Pop Hits	Pop Total	Fold Enrichment	Bonferroni	Benjamini	FDR
GOTERM_BP_FAT	GO:0022900~electron transport chain	13	1.27701	0.00698671	1454268_A_AT, 1417507_AT, 1416494_AT, 1448292_AT, 1453065_AT, 1424364_A_AT, 1416285_AT, 1428636_AT, 1428440_AT, 1423907_A_AT, 1448427_AT, 1449108_AT, 1417193_AT	648	112	13588	2.43392	1	0.263237	11.604
KEGG_PATHWAY	mmu05012:Parkinson's disease	14	1.37525	0.0151243	1416526_A_AT, 1416494_AT, 1448292_AT, 1416285_AT, 1424364_A_AT, 1424562_A_AT, 1449218_AT, 1423907_A_AT, 1448427_AT, 1416020_A_AT, 1451148_AT, 1418709_AT, 1435275_AT, 1416567_S_AT	288	133	5738	2.09722	0.912697	0.198821	16.808
KEGG_PATHWAY	mmu00190:Oxidative phosphorylation	13	1.27701	0.0286504	1416494_AT, 1448292_AT, 1424364_A_AT, 1416285_AT, 1452889_AT, 1449218_AT, 1423907_A_AT, 1448427_AT, 1416020_A_AT, 1448211_AT, 1418709_AT, 1435275_AT, 1416567_S_AT	288	130	5738	1.99236	0.990448	0.266603	29.6018
KEGG_PATHWAY	mmu05016:Huntington's disease	16	1.57171	0.0397259	1425338_AT, 1416494_AT, 1448292_AT, 1416285_AT, 1424364_A_AT, 1424562_A_AT, 1449218_AT, 1417500_A_AT, 1423907_A_AT, 1448427_AT, 1416020_A_AT, 1417193_AT, 1418709_AT, 1435275_AT, 1428296_AT, 1416567_S_AT	288	183	5738	1.74196	0.998475	0.30255	38.7051
GOTERM_MF_FAT	GO:0015077~monovalent inorganic cation transmembrane transporter activity	9	0.884086	0.0627725	1448292_AT, 1424364_A_AT, 1416020_A_AT, 1427465_AT, 1448211_AT, 1435275_AT, 1418709_AT, 1449218_AT, 1416567_S_AT	652	87	13288	2.10831	1	0.691357	63.1281
SP_PIR_KEYWORDS	electron transport	10	0.982318	0.0688134	1417507_AT, 1454268_A_AT, 1416494_AT, 1448292_AT, 1423907_A_AT, 1416285_AT, 1424364_A_AT, 1448427_AT, 1428636_AT, 1449108_AT	911	100	17854	1.95982	1	0.47583	63.6665
GOTERM_MF_FAT	GO:0022890~inorganic cation transmembrane transporter activity	11	1.08055	0.093679	1425546_A_AT, 1448292_AT, 1424364_A_AT, 1416020_A_AT, 1427465_AT, 1417639_AT, 1448211_AT, 1435275_AT, 1418709_AT, 1449218_AT, 1416567_S_AT	652	127	13288	1.76523	1	0.767608	77.9924
GOTERM_MF_FAT	GO:0015078~hydrogen ion transmembrane transporter activity	8	0.785855	0.106555	1448292_AT, 1424364_A_AT, 1416020_A_AT, 1448211_AT, 1435275_AT, 1418709_AT, 1449218_AT, 1416567_S_AT	652	82	13288	1.98833	1	0.800705	82.3423
KEGG_PATHWAY	mmu05010:Alzheimer's disease	14	1.37525	0.122678	1425338_AT, 1416494_AT, 1448292_AT, 1416285_AT, 1424364_A_AT, 1432466_A_AT, 1438391_X_AT, 1449218_AT, 1423907_A_AT, 1448427_AT, 1416020_A_AT, 1418709_AT, 1435275_AT, 1416567_S_AT	288	182	5738	1.53259	1	0.539569	79.4102
GOTERM_BP_FAT	GO:0006119~oxidative phosphorylation	6	0.589391	0.126893	1448292_AT, 1424364_A_AT, 1416020_A_AT, 1448211_AT, 1427282_A_AT, 1416567_S_AT	648	56	13588	2.24669	1	0.801135	90.8116
GOTERM_CC_FAT	GO:0070469~respiratory chain	7	0.687623	0.140915	1416494_AT, 1448292_AT, 1423907_A_AT, 1416285_AT, 1424364_A_AT, 1448427_AT, 1418709_AT	681	65	12504	1.97736	1	0.643018	87.7173
SP_PIR_KEYWORDS	respiratory chain	6	0.589391	0.208069	1416494_AT, 1448292_AT, 1423907_A_AT, 1416285_AT, 1424364_A_AT, 1448427_AT	911	62	17854	1.8966	1	0.751043	96.3582
Annotation Cluster 53	Enrichment Score: 1.149368279689647
Category	Term	Count	%	PValue	Genes	List Total	Pop Hits	Pop Total	Fold Enrichment	Bonferroni	Benjamini	FDR
UP_SEQ_FEATURE	site:Transition state stabilizer	5	0.491159	0.0326713	1453065_AT, 1416468_AT, 1422510_AT, 1428259_AT, 1418601_AT	905	22	16021	4.02336	1	0.927498	43.7519
INTERPRO	IPR015590:Aldehyde dehydrogenase	4	0.392927	0.0612998	1448104_AT, 1453065_AT, 1416468_AT, 1418601_AT	860	19	17763	4.34835	1	0.826255	64.4981
INTERPRO	IPR016162:Aldehyde dehydrogenase, N-terminal	4	0.392927	0.0612998	1448104_AT, 1453065_AT, 1416468_AT, 1418601_AT	860	19	17763	4.34835	1	0.826255	64.4981
INTERPRO	IPR016160:Aldehyde dehydrogenase, conserved site	5	0.491159	0.0869983	1448104_AT, 1453065_AT, 1416468_AT, 1418601_AT, 1416759_AT	860	35	17763	2.95066	1	0.884492	77.4628
GOTERM_MF_FAT	GO:0016620~oxidoreductase activity, acting on the aldehyde or oxo group of donors, NAD or NADP as acceptor	4	0.392927	0.167712	1448104_AT, 1453065_AT, 1416468_AT, 1418601_AT	652	29	13288	2.81109	1	0.878742	94.0706
Annotation Cluster 54	Enrichment Score: 1.1057334050628704
Category	Term	Count	%	PValue	Genes	List Total	Pop Hits	Pop Total	Fold Enrichment	Bonferroni	Benjamini	FDR
INTERPRO	IPR016038:Thiolase-like, subgroup	4	0.392927	0.00760207	1424182_AT, 1419974_AT, 1423828_AT, 1428145_AT	860	9	17763	9.17984	0.99996	0.312943	11.7437
INTERPRO	IPR002155:Thiolase	3	0.294695	0.144915	1424182_AT, 1419974_AT, 1428145_AT	860	14	17763	4.426	1	0.955088	92.2918
GOTERM_MF_FAT	GO:0016408~C-acyltransferase activity	3	0.294695	0.183297	1424182_AT, 1419974_AT, 1428145_AT	652	16	13288	3.82132	1	0.895997	95.5673
PIR_SUPERFAMILY	PIRSF000429:Ac-CoA_Ac_transf	3	0.294695	0.18701	1424182_AT, 1419974_AT, 1428145_AT	463	14	8136	3.7655	1	0.999679	94.949
Annotation Cluster 55	Enrichment Score: 1.0865594339458164
Category	Term	Count	%	PValue	Genes	List Total	Pop Hits	Pop Total	Fold Enrichment	Bonferroni	Benjamini	FDR
GOTERM_MF_FAT	GO:0005506~iron ion binding	30	2.94695	0.00297038	1454268_A_AT, 1417507_AT, 1416686_AT, 1417714_X_AT, 1417879_AT, 1418780_AT, 1417590_AT, 1428636_AT, 1460194_AT, 1434191_AT, 1417952_AT, 1416849_AT, 1428394_AT, 1423907_A_AT, 1435017_AT, 1417184_S_AT, 1423630_AT, 1416429_A_AT, 1417070_AT, 1425546_A_AT, 1422816_A_AT, 1448696_AT, 1423785_AT, 1419039_AT, 1415964_AT, 1418648_AT, 1428259_AT, 1449108_AT, 1428296_AT, 1448842_AT	652	343	13288	1.78254	0.911737	0.119935	4.47499
SP_PIR_KEYWORDS	iron	29	2.84872	0.00401014	1454268_A_AT, 1417507_AT, 1416686_AT, 1417714_X_AT, 1418780_AT, 1417590_AT, 1417879_AT, 1428636_AT, 1460194_AT, 1417952_AT, 1416849_AT, 1428394_AT, 1423907_A_AT, 1435017_AT, 1417184_S_AT, 1423630_AT, 1416429_A_AT, 1417070_AT, 1425546_A_AT, 1422816_A_AT, 1448696_AT, 1423785_AT, 1419039_AT, 1415964_AT, 1418648_AT, 1428259_AT, 1449108_AT, 1428296_AT, 1448842_AT	911	321	17854	1.77056	0.838014	0.0794081	5.54629
GOTERM_MF_FAT	GO:0046906~tetrapyrrole binding	15	1.47348	0.0162694	1454268_A_AT, 1417714_X_AT, 1417590_AT, 1418780_AT, 1417879_AT, 1417952_AT, 1419039_AT, 1441850_X_AT, 1417184_S_AT, 1423630_AT, 1418915_AT, 1416429_A_AT, 1428259_AT, 1428296_AT, 1417070_AT	652	151	13288	2.02454	0.999998	0.359923	22.3101
SP_PIR_KEYWORDS	heme	14	1.37525	0.0294815	1417507_AT, 1454268_A_AT, 1417714_X_AT, 1418780_AT, 1417879_AT, 1417590_AT, 1417952_AT, 1419039_AT, 1417184_S_AT, 1423630_AT, 1416429_A_AT, 1428259_AT, 1428296_AT, 1417070_AT	911	142	17854	1.93222	0.999999	0.306758	34.6194
GOTERM_MF_FAT	GO:0020037~heme binding	13	1.27701	0.0503282	1454268_A_AT, 1417714_X_AT, 1418780_AT, 1417879_AT, 1417590_AT, 1417952_AT, 1419039_AT, 1417184_S_AT, 1423630_AT, 1416429_A_AT, 1428259_AT, 1428296_AT, 1417070_AT	652	144	13288	1.83989	1	0.642184	54.8292
UP_SEQ_FEATURE	metal ion-binding site:Iron (heme axial ligand)	10	0.982318	0.106211	1417507_AT, 1454268_A_AT, 1417590_AT, 1418780_AT, 1428636_AT, 1416429_A_AT, 1428259_AT, 1417952_AT, 1428296_AT, 1417070_AT	905	99	16021	1.78816	1	0.997096	85.7022
INTERPRO	IPR002401:Cytochrome P450, E-class, group I	6	0.589391	0.249908	1417590_AT, 1418780_AT, 1417952_AT, 1419039_AT, 1428296_AT, 1417070_AT	860	70	17763	1.7704	1	0.990506	99.0973
SP_PIR_KEYWORDS	Monooxygenase	8	0.785855	0.312325	1422904_AT, 1417590_AT, 1418780_AT, 1417429_AT, 1417952_AT, 1419039_AT, 1428296_AT, 1417070_AT	911	108	17854	1.45172	1	0.85449	99.5094
COG_ONTOLOGY	Secondary metabolites biosynthesis, transport, and catabolism	7	0.687623	0.387899	1417590_AT, 1418780_AT, 1419547_AT, 1417952_AT, 1419039_AT, 1428296_AT, 1417070_AT	95	109	2040	1.37904	0.999945	0.805281	97.6148
INTERPRO	IPR001128:Cytochrome P450	6	0.589391	0.412628	1417590_AT, 1418780_AT, 1417952_AT, 1419039_AT, 1428296_AT, 1417070_AT	860	87	17763	1.42446	1	0.99888	99.9835
INTERPRO	IPR017972:Cytochrome P450, conserved site	6	0.589391	0.431888	1417590_AT, 1418780_AT, 1417952_AT, 1419039_AT, 1428296_AT, 1417070_AT	860	89	17763	1.39245	1	0.999104	99.9905
INTERPRO	IPR017973:Cytochrome P450, C-terminal region	5	0.491159	0.555109	1417590_AT, 1417952_AT, 1419039_AT, 1428296_AT, 1417070_AT	860	81	17763	1.27498	1	0.999862	99.9998
Annotation Cluster 56	Enrichment Score: 1.0783433767268737
Category	Term	Count	%	PValue	Genes	List Total	Pop Hits	Pop Total	Fold Enrichment	Bonferroni	Benjamini	FDR
UP_SEQ_FEATURE	domain:EGF-like 4; calcium-binding	8	0.785855	0.00172904	1425896_A_AT, 1417018_AT, 1427183_AT, 1419182_AT, 1418394_A_AT, 1418049_AT, 1435603_AT, 1417399_AT	905	32	16021	4.42569	0.975059	0.308659	2.95322
INTERPRO	IPR013091:EGF calcium-binding	10	0.982318	0.00581977	1425896_A_AT, 1417018_AT, 1427183_AT, 1416808_AT, 1419182_AT, 1418058_AT, 1418394_A_AT, 1418049_AT, 1417900_A_AT, 1417399_AT	860	69	17763	2.99343	0.99957	0.286098	9.1128
SMART	SM00179:EGF_CA	11	1.08055	0.00586968	1425896_A_AT, 1417018_AT, 1427183_AT, 1416808_AT, 1419182_AT, 1418058_AT, 1418394_A_AT, 1418049_AT, 1435603_AT, 1417900_A_AT, 1417399_AT	397	91	9131	2.78022	0.738737	0.285061	7.2598
INTERPRO	IPR001881:EGF-like calcium-binding	11	1.08055	0.0123941	1425896_A_AT, 1417018_AT, 1427183_AT, 1416808_AT, 1419182_AT, 1418058_AT, 1418394_A_AT, 1418049_AT, 1435603_AT, 1417900_A_AT, 1417399_AT	860	91	17763	2.49672	1	0.446507	18.4672
UP_SEQ_FEATURE	domain:EGF-like 3; calcium-binding	7	0.687623	0.0126415	1417018_AT, 1427183_AT, 1416808_AT, 1419182_AT, 1418058_AT, 1418394_A_AT, 1417399_AT	905	35	16021	3.54055	1	0.742519	19.7784
INTERPRO	IPR000152:EGF-type aspartate/asparagine hydroxylation conserved site	11	1.08055	0.0153362	1425896_A_AT, 1417018_AT, 1427183_AT, 1416808_AT, 1419182_AT, 1418058_AT, 1418394_A_AT, 1418049_AT, 1435603_AT, 1417900_A_AT, 1417399_AT	860	94	17763	2.41703	1	0.48422	22.3538
INTERPRO	IPR018097:EGF-like calcium-binding, conserved site	11	1.08055	0.0153362	1425896_A_AT, 1417018_AT, 1427183_AT, 1416808_AT, 1419182_AT, 1418058_AT, 1418394_A_AT, 1418049_AT, 1435603_AT, 1417900_A_AT, 1417399_AT	860	94	17763	2.41703	1	0.48422	22.3538
UP_SEQ_FEATURE	domain:EGF-like 5; calcium-binding	6	0.589391	0.0248824	1425896_A_AT, 1417018_AT, 1427183_AT, 1416808_AT, 1419182_AT, 1418049_AT	905	30	16021	3.54055	1	0.893478	35.3691
UP_SEQ_FEATURE	domain:EGF-like 2; calcium-binding	8	0.785855	0.0259764	1417018_AT, 1427183_AT, 1419182_AT, 1418058_AT, 1418394_A_AT, 1418049_AT, 1417900_A_AT, 1417399_AT	905	52	16021	2.7235	1	0.894136	36.6137
SMART	SM00181:EGF	15	1.47348	0.0580371	1417018_AT, 1418788_AT, 1417533_A_AT, 1425896_A_AT, 1427183_AT, 1416808_AT, 1420911_A_AT, 1419182_AT, 1418058_AT, 1418394_A_AT, 1418049_AT, 1435603_AT, 1417900_A_AT, 1417399_AT, 1426981_AT	397	203	9131	1.69951	0.999999	0.678899	53.4878
INTERPRO	IPR006210:EGF-like	15	1.47348	0.115832	1417018_AT, 1418788_AT, 1417533_A_AT, 1425896_A_AT, 1427183_AT, 1416808_AT, 1420911_A_AT, 1419182_AT, 1418058_AT, 1418394_A_AT, 1418049_AT, 1435603_AT, 1417900_A_AT, 1417399_AT, 1426981_AT	860	203	17763	1.52621	1	0.93444	86.6725
UP_SEQ_FEATURE	domain:EGF-like 6; calcium-binding	4	0.392927	0.137409	1417018_AT, 1427183_AT, 1419182_AT, 1418049_AT	905	23	16021	3.07874	1	0.998779	92.2735
UP_SEQ_FEATURE	domain:EGF-like 1	10	0.982318	0.144025	1425896_A_AT, 1420911_A_AT, 1416808_AT, 1419182_AT, 1418058_AT, 1418394_A_AT, 1418049_AT, 1435603_AT, 1417900_A_AT, 1418788_AT	905	106	16021	1.67007	1	0.999003	93.2383
UP_SEQ_FEATURE	domain:EGF-like 11; calcium-binding	3	0.294695	0.185214	1425896_A_AT, 1418049_AT, 1435603_AT	905	14	16021	3.79345	1	0.999737	97.1222
UP_SEQ_FEATURE	domain:EGF-like 12; calcium-binding	3	0.294695	0.185214	1425896_A_AT, 1418049_AT, 1435603_AT	905	14	16021	3.79345	1	0.999737	97.1222
INTERPRO	IPR000742:EGF-like, type 3	13	1.27701	0.256639	1417018_AT, 1418788_AT, 1425896_A_AT, 1427183_AT, 1416808_AT, 1420911_A_AT, 1419182_AT, 1418058_AT, 1418394_A_AT, 1418049_AT, 1435603_AT, 1417900_A_AT, 1417399_AT	860	199	17763	1.3493	1	0.99028	99.2211
UP_SEQ_FEATURE	domain:EGF-like 7; calcium-binding	3	0.294695	0.41602	1425896_A_AT, 1419182_AT, 1418049_AT	905	25	16021	2.12433	1	1	99.991
INTERPRO	IPR013111:EGF, extracellular	5	0.491159	0.451448	1425896_A_AT, 1419182_AT, 1435603_AT, 1417533_A_AT, 1418788_AT	860	71	17763	1.45455	1	0.999289	99.9946
SP_PIR_KEYWORDS	egf-like domain	13	1.27701	0.459462	1417018_AT, 1418788_AT, 1425896_A_AT, 1427183_AT, 1416808_AT, 1420911_A_AT, 1419182_AT, 1418058_AT, 1418394_A_AT, 1418049_AT, 1435603_AT, 1417900_A_AT, 1417399_AT	911	222	17854	1.14764	1	0.92606	99.9839
UP_SEQ_FEATURE	domain:EGF-like 3	5	0.491159	0.515536	1425896_A_AT, 1418049_AT, 1435603_AT, 1417900_A_AT, 1418788_AT	905	66	16021	1.34112	1	1	99.9996
INTERPRO	IPR006209:EGF	7	0.687623	0.589577	1425896_A_AT, 1420911_A_AT, 1416808_AT, 1419182_AT, 1418049_AT, 1435603_AT, 1417900_A_AT	860	128	17763	1.12955	1	0.999933	100
UP_SEQ_FEATURE	domain:EGF-like 6	3	0.294695	0.625716	1425896_A_AT, 1416808_AT, 1435603_AT	905	37	16021	1.43536	1	1	100
UP_SEQ_FEATURE	domain:EGF-like 2	5	0.491159	0.658369	1425896_A_AT, 1420911_A_AT, 1416808_AT, 1435603_AT, 1418788_AT	905	79	16021	1.12043	1	1	100
INTERPRO	IPR013032:EGF-like region, conserved site	14	1.37525	0.740014	1417018_AT, 1418788_AT, 1417533_A_AT, 1426285_AT, 1425896_A_AT, 1427183_AT, 1416808_AT, 1420911_A_AT, 1419182_AT, 1418058_AT, 1418049_AT, 1435603_AT, 1417900_A_AT, 1417399_AT	860	310	17763	0.932791	1	0.999998	100
Annotation Cluster 57	Enrichment Score: 1.0770556972604763
Category	Term	Count	%	PValue	Genes	List Total	Pop Hits	Pop Total	Fold Enrichment	Bonferroni	Benjamini	FDR
GOTERM_BP_FAT	GO:0030218~erythrocyte differentiation	7	0.687623	0.0255266	1426018_A_AT, 1417714_X_AT, 1430135_AT, 1425620_AT, 1435436_AT, 1448696_AT, 1422912_AT	648	48	13588	3.058	1	0.496314	36.5491
GOTERM_BP_FAT	GO:0034101~erythrocyte homeostasis	7	0.687623	0.033274	1426018_A_AT, 1417714_X_AT, 1430135_AT, 1425620_AT, 1435436_AT, 1448696_AT, 1422912_AT	648	51	13588	2.87812	1	0.527935	44.8618
GOTERM_BP_FAT	GO:0030097~hemopoiesis	19	1.8664	0.0550924	1453851_A_AT, 1417714_X_AT, 1449130_AT, 1430135_AT, 1418982_AT, 1443260_AT, 1418589_A_AT, 1435272_AT, 1437122_AT, 1435436_AT, 1425620_AT, 1448696_AT, 1422912_AT, 1426018_A_AT, 1416034_AT, 1417184_S_AT, 1419155_A_AT, 1417311_AT, 1417193_AT	648	251	13588	1.58731	1	0.632841	63.0987
GOTERM_BP_FAT	GO:0048534~hemopoietic or lymphoid organ development	19	1.8664	0.124543	1453851_A_AT, 1417714_X_AT, 1449130_AT, 1430135_AT, 1418982_AT, 1443260_AT, 1418589_A_AT, 1435272_AT, 1437122_AT, 1435436_AT, 1425620_AT, 1448696_AT, 1422912_AT, 1426018_A_AT, 1416034_AT, 1417184_S_AT, 1419155_A_AT, 1417311_AT, 1417193_AT	648	281	13588	1.41784	1	0.801038	90.3667
GOTERM_BP_FAT	GO:0002520~immune system development	19	1.8664	0.168267	1453851_A_AT, 1417714_X_AT, 1449130_AT, 1430135_AT, 1418982_AT, 1443260_AT, 1418589_A_AT, 1435272_AT, 1437122_AT, 1435436_AT, 1425620_AT, 1448696_AT, 1422912_AT, 1426018_A_AT, 1416034_AT, 1417184_S_AT, 1419155_A_AT, 1417311_AT, 1417193_AT	648	295	13588	1.35055	1	0.84756	96.0886
GOTERM_BP_FAT	GO:0048872~homeostasis of number of cells	9	0.884086	0.170401	1426018_A_AT, 1450852_S_AT, 1417714_X_AT, 1430135_AT, 1437122_AT, 1425620_AT, 1435436_AT, 1448696_AT, 1422912_AT	648	113	13588	1.67011	1	0.847953	96.2614
GOTERM_BP_FAT	GO:0030099~myeloid cell differentiation	8	0.785855	0.172833	1426018_A_AT, 1417714_X_AT, 1430135_AT, 1418982_AT, 1425620_AT, 1435436_AT, 1448696_AT, 1422912_AT	648	96	13588	1.74743	1	0.850055	96.4496
Annotation Cluster 58	Enrichment Score: 1.074132041057635
Category	Term	Count	%	PValue	Genes	List Total	Pop Hits	Pop Total	Fold Enrichment	Bonferroni	Benjamini	FDR
GOTERM_BP_FAT	GO:0015669~gas transport	4	0.392927	0.0214901	1417714_X_AT, 1448752_AT, 1417184_S_AT, 1423630_AT	648	13	13588	6.45204	1	0.456259	31.7629
UP_SEQ_FEATURE	metal ion-binding site:Iron (heme distal ligand)	3	0.294695	0.0709906	1417714_X_AT, 1417184_S_AT, 1423630_AT	905	8	16021	6.63854	1	0.985665	72.0726
PIR_SUPERFAMILY	PIRSF036518:globin	3	0.294695	0.0717513	1417714_X_AT, 1417184_S_AT, 1423630_AT	463	8	8136	6.58963	1	0.984668	65.8255
GOTERM_BP_FAT	GO:0015671~oxygen transport	3	0.294695	0.0936701	1417714_X_AT, 1417184_S_AT, 1423630_AT	648	11	13588	5.71886	1	0.74424	82.2758
INTERPRO	IPR000971:Globin, subset	3	0.294695	0.0962065	1417714_X_AT, 1417184_S_AT, 1423630_AT	860	11	17763	5.63309	1	0.901341	80.9089
INTERPRO	IPR012292:Globin	3	0.294695	0.0962065	1417714_X_AT, 1417184_S_AT, 1423630_AT	860	11	17763	5.63309	1	0.901341	80.9089
GOTERM_MF_FAT	GO:0005344~oxygen transporter activity	3	0.294695	0.0983519	1417714_X_AT, 1417184_S_AT, 1423630_AT	652	11	13288	5.55828	1	0.778779	79.6754
SP_PIR_KEYWORDS	oxygen transport	3	0.294695	0.105222	1417714_X_AT, 1417184_S_AT, 1423630_AT	911	11	17854	5.34498	1	0.580358	79.3778
UP_SEQ_FEATURE	metal ion-binding site:Iron (heme proximal ligand)	3	0.294695	0.124828	1417714_X_AT, 1417184_S_AT, 1423630_AT	905	11	16021	4.82803	1	0.9982	90.0707
GOTERM_MF_FAT	GO:0019825~oxygen binding	3	0.294695	0.147979	1417714_X_AT, 1417184_S_AT, 1423630_AT	652	14	13288	4.36722	1	0.857784	91.4958
Annotation Cluster 59	Enrichment Score: 1.0512755039852317
Category	Term	Count	%	PValue	Genes	List Total	Pop Hits	Pop Total	Fold Enrichment	Bonferroni	Benjamini	FDR
GOTERM_BP_FAT	GO:0009725~response to hormone stimulus	16	1.57171	0.0122741	1419100_AT, 1416647_AT, 1416225_AT, 1428636_AT, 1418288_AT, 1437122_AT, 1416632_AT, 1433694_AT, 1416034_AT, 1417962_S_AT, 1419088_AT, 1421063_S_AT, 1448416_AT, 1427918_A_AT, 1416041_AT, 1423104_AT	648	165	13588	2.03337	1	0.353852	19.5284
GOTERM_BP_FAT	GO:0009719~response to endogenous stimulus	17	1.66994	0.0147114	1447863_S_AT, 1419100_AT, 1416647_AT, 1416225_AT, 1428636_AT, 1418288_AT, 1437122_AT, 1416632_AT, 1433694_AT, 1416034_AT, 1417962_S_AT, 1419088_AT, 1421063_S_AT, 1448416_AT, 1427918_A_AT, 1416041_AT, 1423104_AT	648	184	13588	1.93737	1	0.378625	22.9511
GOTERM_BP_FAT	GO:0032870~cellular response to hormone stimulus	6	0.589391	0.141284	1417962_S_AT, 1418288_AT, 1427918_A_AT, 1416041_AT, 1433694_AT, 1423104_AT	648	58	13588	2.16922	1	0.8239	93.141
GOTERM_BP_FAT	GO:0032869~cellular response to insulin stimulus	5	0.491159	0.146868	1418288_AT, 1427918_A_AT, 1416041_AT, 1433694_AT, 1423104_AT	648	43	13588	2.43827	1	0.826871	93.8847
GOTERM_BP_FAT	GO:0043434~response to peptide hormone stimulus	8	0.785855	0.166555	1417962_S_AT, 1419100_AT, 1418288_AT, 1437122_AT, 1427918_A_AT, 1416041_AT, 1433694_AT, 1423104_AT	648	95	13588	1.76582	1	0.849177	95.9445
GOTERM_BP_FAT	GO:0010033~response to organic substance	29	2.84872	0.226987	1421097_AT, 1428636_AT, 1432466_A_AT, 1419088_AT, 1417962_S_AT, 1418142_AT, 1425895_A_AT, 1448325_AT, 1416630_AT, 1448416_AT, 1448602_AT, 1427918_A_AT, 1416041_AT, 1425546_A_AT, 1447863_S_AT, 1419100_AT, 1416647_AT, 1416225_AT, 1418288_AT, 1437122_AT, 1416632_AT, 1419039_AT, 1433694_AT, 1416034_AT, 1450852_S_AT, 1447520_AT, 1422438_AT, 1421063_S_AT, 1423104_AT	648	505	13588	1.20417	1	0.903221	98.9212
GOTERM_BP_FAT	GO:0032868~response to insulin stimulus	5	0.491159	0.308922	1418288_AT, 1427918_A_AT, 1416041_AT, 1433694_AT, 1423104_AT	648	59	13588	1.77705	1	0.945434	99.8497
Annotation Cluster 60	Enrichment Score: 1.04878319115363
Category	Term	Count	%	PValue	Genes	List Total	Pop Hits	Pop Total	Fold Enrichment	Bonferroni	Benjamini	FDR
GOTERM_BP_FAT	GO:0009991~response to extracellular stimulus	13	1.27701	0.0248133	1447863_S_AT, 1416225_AT, 1416647_AT, 1437122_AT, 1418788_AT, 1422645_AT, 1420619_A_AT, 1422444_AT, 1416967_AT, 1426690_A_AT, 1415984_AT, 1451290_AT, 1448416_AT	648	133	13588	2.04961	1	0.490189	35.7269
GOTERM_BP_FAT	GO:0031667~response to nutrient levels	10	0.982318	0.0975067	1422645_AT, 1416225_AT, 1426690_A_AT, 1416647_AT, 1416967_AT, 1437122_AT, 1451290_AT, 1415984_AT, 1448416_AT, 1418788_AT	648	115	13588	1.8234	1	0.751104	83.5503
GOTERM_BP_FAT	GO:0007584~response to nutrient	6	0.589391	0.295075	1416225_AT, 1416647_AT, 1416967_AT, 1437122_AT, 1448416_AT, 1418788_AT	648	76	13588	1.65546	1	0.939585	99.7869
Annotation Cluster 61	Enrichment Score: 1.0477075272051262
Category	Term	Count	%	PValue	Genes	List Total	Pop Hits	Pop Total	Fold Enrichment	Bonferroni	Benjamini	FDR
GOTERM_CC_FAT	GO:0016323~basolateral plasma membrane	18	1.76817	0.00166712	1434537_AT, 1434180_AT, 1417307_AT, 1435649_AT, 1416203_AT, 1424408_AT, 1428650_AT, 1424842_A_AT, 1422444_AT, 1417092_AT, 1449041_A_AT, 1418136_AT, 1417622_AT, 1418453_A_AT, 1457465_AT, 1421814_AT, 1418030_AT, 1433933_S_AT, 1426599_A_AT	681	141	12504	2.34399	0.46332	0.0278924	2.27724
GOTERM_CC_FAT	GO:0005912~adherens junction	12	1.17878	0.0290066	1455610_AT, 1434180_AT, 1435649_AT, 1422444_AT, 1449041_A_AT, 1418136_AT, 1424408_AT, 1434621_AT, 1455056_AT, 1460356_AT, 1428650_AT, 1424842_A_AT	681	106	12504	2.07863	0.999983	0.283023	33.3951
GOTERM_CC_FAT	GO:0070161~anchoring junction	13	1.27701	0.0353571	1455610_AT, 1434180_AT, 1435649_AT, 1424408_AT, 1434621_AT, 1455056_AT, 1428650_AT, 1424842_A_AT, 1422444_AT, 1449041_A_AT, 1418136_AT, 1416271_AT, 1460356_AT	681	123	12504	1.94062	0.999999	0.318615	39.1637
GOTERM_CC_FAT	GO:0030055~cell-substrate junction	8	0.785855	0.0663445	1434180_AT, 1435649_AT, 1417307_AT, 1449041_A_AT, 1418136_AT, 1424408_AT, 1428650_AT, 1424842_A_AT	681	66	12504	2.2256	1	0.433916	61.2392
GOTERM_CC_FAT	GO:0005924~cell-substrate adherens junction	7	0.687623	0.112928	1434180_AT, 1435649_AT, 1449041_A_AT, 1418136_AT, 1424408_AT, 1428650_AT, 1424842_A_AT	681	61	12504	2.10703	1	0.576643	80.8788
GOTERM_CC_FAT	GO:0005925~focal adhesion	6	0.589391	0.196922	1434180_AT, 1449041_A_AT, 1418136_AT, 1424408_AT, 1428650_AT, 1424842_A_AT	681	57	12504	1.93276	1	0.750037	95.1575
SP_PIR_KEYWORDS	cell junction	23	2.25933	0.349807	1421287_A_AT, 1455610_AT, 1434180_AT, 1435649_AT, 1420514_AT, 1424408_AT, 1442823_AT, 1417644_AT, 1434621_AT, 1415800_AT, 1424842_A_AT, 1421862_A_AT, 1417960_AT, 1449041_A_AT, 1418136_AT, 1416271_AT, 1419137_AT, 1427773_A_AT, 1460356_AT, 1416825_AT, 1451499_AT, 1456609_AT, 1424367_A_AT	911	392	17854	1.1499	1	0.868842	99.7786
GOTERM_CC_FAT	GO:0030054~cell junction	27	2.65226	0.506929	1455610_AT, 1417307_AT, 1452387_A_AT, 1442823_AT, 1417644_AT, 1434621_AT, 1424842_A_AT, 1421862_A_AT, 1451499_AT, 1424367_A_AT, 1434180_AT, 1435649_AT, 1420514_AT, 1424408_AT, 1455056_AT, 1428650_AT, 1415800_AT, 1417960_AT, 1422444_AT, 1418136_AT, 1449041_A_AT, 1416271_AT, 1419137_AT, 1427773_A_AT, 1460356_AT, 1416825_AT, 1456609_AT	681	470	12504	1.05479	1	0.953432	99.9942
GOTERM_CC_FAT	GO:0045202~synapse	15	1.47348	0.831801	1425338_AT, 1417307_AT, 1442823_AT, 1417644_AT, 1450852_S_AT, 1416114_AT, 1421862_A_AT, 1417960_AT, 1417081_A_AT, 1427773_A_AT, 1419137_AT, 1416825_AT, 1451499_AT, 1424367_A_AT, 1456609_AT	681	319	12504	0.863381	1	0.997497	100
Annotation Cluster 62	Enrichment Score: 1.0292589818605165
Category	Term	Count	%	PValue	Genes	List Total	Pop Hits	Pop Total	Fold Enrichment	Bonferroni	Benjamini	FDR
GOTERM_BP_FAT	GO:0010863~positive regulation of phospholipase C activity	5	0.491159	0.0330802	1450852_S_AT, 1417500_A_AT, 1417092_AT, 1452398_AT, 1438936_S_AT	648	26	13588	4.03253	1	0.529065	44.6669
GOTERM_BP_FAT	GO:0007202~activation of phospholipase C activity	5	0.491159	0.0330802	1450852_S_AT, 1417500_A_AT, 1417092_AT, 1452398_AT, 1438936_S_AT	648	26	13588	4.03253	1	0.529065	44.6669
GOTERM_BP_FAT	GO:0010518~positive regulation of phospholipase activity	5	0.491159	0.0330802	1450852_S_AT, 1417500_A_AT, 1417092_AT, 1452398_AT, 1438936_S_AT	648	26	13588	4.03253	1	0.529065	44.6669
GOTERM_BP_FAT	GO:0060193~positive regulation of lipase activity	5	0.491159	0.0374187	1450852_S_AT, 1417500_A_AT, 1417092_AT, 1452398_AT, 1438936_S_AT	648	27	13588	3.88317	1	0.55477	48.8759
GOTERM_BP_FAT	GO:0010517~regulation of phospholipase activity	5	0.491159	0.0420682	1450852_S_AT, 1417500_A_AT, 1417092_AT, 1452398_AT, 1438936_S_AT	648	28	13588	3.74449	1	0.570747	53.0503
GOTERM_BP_FAT	GO:0060191~regulation of lipase activity	5	0.491159	0.0637605	1450852_S_AT, 1417500_A_AT, 1417092_AT, 1452398_AT, 1438936_S_AT	648	32	13588	3.27643	1	0.664987	68.6216
GOTERM_BP_FAT	GO:0051345~positive regulation of hydrolase activity	8	0.785855	0.0905995	1450852_S_AT, 1431798_A_AT, 1417500_A_AT, 1417092_AT, 1460718_S_AT, 1452398_AT, 1423135_AT, 1438936_S_AT	648	81	13588	2.07103	1	0.733971	81.1891
GOTERM_BP_FAT	GO:0051480~cytosolic calcium ion homeostasis	5	0.491159	0.105172	1416034_AT, 1450852_S_AT, 1417500_A_AT, 1417092_AT, 1427465_AT	648	38	13588	2.7591	1	0.765419	85.8424
GOTERM_BP_FAT	GO:0007200~activation of phospholipase C activity by G-protein coupled receptor protein signaling pathway coupled to IP3 second messenger	4	0.392927	0.113904	1450852_S_AT, 1417500_A_AT, 1417092_AT, 1452398_AT	648	25	13588	3.35506	1	0.778084	88.0858
GOTERM_BP_FAT	GO:0048015~phosphoinositide-mediated signaling	5	0.491159	0.121136	1424958_AT, 1450852_S_AT, 1417500_A_AT, 1417092_AT, 1452398_AT	648	40	13588	2.62114	1	0.794692	89.6854
GOTERM_BP_FAT	GO:0007204~elevation of cytosolic calcium ion concentration	4	0.392927	0.24447	1416034_AT, 1450852_S_AT, 1417500_A_AT, 1417092_AT	648	36	13588	2.3299	1	0.915363	99.2786
GOTERM_BP_FAT	GO:0019932~second-messenger-mediated signaling	7	0.687623	0.494285	1424958_AT, 1450852_S_AT, 1417500_A_AT, 1417092_AT, 1421425_A_AT, 1452398_AT, 1417594_AT	648	118	13588	1.24393	1	0.988158	99.9994
GOTERM_BP_FAT	GO:0051336~regulation of hydrolase activity	9	0.884086	0.721595	1450852_S_AT, 1427126_AT, 1431798_A_AT, 1417500_A_AT, 1452388_AT, 1417092_AT, 1460718_S_AT, 1452398_AT, 1423135_AT, 1438936_S_AT	648	196	13588	0.962868	1	0.998727	100
Annotation Cluster 63	Enrichment Score: 1.0248626870165383
Category	Term	Count	%	PValue	Genes	List Total	Pop Hits	Pop Total	Fold Enrichment	Bonferroni	Benjamini	FDR
INTERPRO	IPR011992:EF-Hand type	18	1.76817	0.0495125	1448321_AT, 1417421_AT, 1427483_AT, 1425338_AT, 1417307_AT, 1435389_AT, 1424382_AT, 1448371_AT, 1428440_AT, 1452398_AT, 1448507_AT, 1437869_AT, 1448394_AT, 1416114_AT, 1455091_AT, 1425560_A_AT, 1452670_AT, 1423677_AT, 1423155_AT	860	227	17763	1.63781	1	0.806946	56.4517
GOTERM_MF_FAT	GO:0005509~calcium ion binding	50	4.91159	0.115858	1417421_AT, 1436867_AT, 1448371_AT, 1422597_AT, 1437869_AT, 1419547_AT, 1427183_AT, 1455091_AT, 1433626_AT, 1435603_AT, 1416803_AT, 1448416_AT, 1417399_AT, 1425338_AT, 1435389_AT, 1415812_AT, 1424382_AT, 1452398_AT, 1416808_AT, 1425560_A_AT, 1418058_AT, 1460694_S_AT, 1428259_AT, 1416825_AT, 1417220_AT, 1417307_AT, 1416221_AT, 1448507_AT, 1452026_A_AT, 1448394_AT, 1416114_AT, 1419182_AT, 1424308_A…	652	840	13288	1.21312	1	0.807415	84.9694
SP_PIR_KEYWORDS	calcium	45	4.42043	0.146815	1417421_AT, 1417220_AT, 1417307_AT, 1436867_AT, 1448371_AT, 1437869_AT, 1448507_AT, 1422597_AT, 1419547_AT, 1452026_A_AT, 1448394_AT, 1427183_AT, 1416114_AT, 1424308_AT, 1419182_AT, 1455091_AT, 1418049_AT, 1436319_AT, 1433626_AT, 1435603_AT, 1416803_AT, 1423677_AT, 1430388_A_AT, 1417399_AT, 1423155_AT, 1451499_AT, 1417018_AT, 1448321_AT, 1427483_AT, 1435389_AT, 1415812_AT, 1424382_AT, 1428440_AT,…	911	731	17854	1.20646	1	0.669309	89.5099
Annotation Cluster 64	Enrichment Score: 1.0010474074383717
Category	Term	Count	%	PValue	Genes	List Total	Pop Hits	Pop Total	Fold Enrichment	Bonferroni	Benjamini	FDR
GOTERM_BP_FAT	GO:0030334~regulation of cell migration	10	0.982318	0.0308426	1421287_A_AT, 1435649_AT, 1417574_AT, 1449041_A_AT, 1437122_AT, 1425620_AT, 1423135_AT, 1418788_AT, 1426285_AT, 1423104_AT	648	92	13588	2.27925	1	0.523908	42.3705
GOTERM_BP_FAT	GO:0051270~regulation of cell motion	11	1.08055	0.0311803	1421287_A_AT, 1435649_AT, 1417574_AT, 1449041_A_AT, 1437122_AT, 1425620_AT, 1423135_AT, 1422627_A_AT, 1418788_AT, 1426285_AT, 1423104_AT	648	107	13588	2.15571	1	0.524403	42.7227
GOTERM_BP_FAT	GO:0040012~regulation of locomotion	11	1.08055	0.036733	1421287_A_AT, 1435649_AT, 1417574_AT, 1449041_A_AT, 1437122_AT, 1425620_AT, 1423135_AT, 1422627_A_AT, 1418788_AT, 1426285_AT, 1423104_AT	648	110	13588	2.09691	1	0.557504	48.2314
GOTERM_BP_FAT	GO:0030335~positive regulation of cell migration	4	0.392927	0.257432	1417574_AT, 1449041_A_AT, 1437122_AT, 1423104_AT	648	37	13588	2.26693	1	0.920378	99.4679
GOTERM_BP_FAT	GO:0051272~positive regulation of cell motion	4	0.392927	0.309984	1417574_AT, 1449041_A_AT, 1437122_AT, 1423104_AT	648	41	13588	2.04577	1	0.945582	99.8537
GOTERM_BP_FAT	GO:0040017~positive regulation of locomotion	4	0.392927	0.349645	1417574_AT, 1449041_A_AT, 1437122_AT, 1423104_AT	648	44	13588	1.90629	1	0.960446	99.9484
Annotation Cluster 65	Enrichment Score: 0.9941420736781005
Category	Term	Count	%	PValue	Genes	List Total	Pop Hits	Pop Total	Fold Enrichment	Bonferroni	Benjamini	FDR
UP_SEQ_FEATURE	domain:VWFC	4	0.392927	0.067412	1416953_AT, 1426851_A_AT, 1416221_AT, 1428259_AT	905	17	16021	4.16536	1	0.984	70.1494
SMART	SM00214:VWC	5	0.491159	0.107408	1416953_AT, 1426851_A_AT, 1416221_AT, 1428259_AT, 1426951_AT	397	42	9131	2.7381	1	0.782145	76.653
INTERPRO	IPR001007:von Willebrand factor, type C	5	0.491159	0.143813	1416953_AT, 1426851_A_AT, 1416221_AT, 1428259_AT, 1426951_AT	860	42	17763	2.45889	1	0.956026	92.1276
Annotation Cluster 66	Enrichment Score: 0.9897233978773586
Category	Term	Count	%	PValue	Genes	List Total	Pop Hits	Pop Total	Fold Enrichment	Bonferroni	Benjamini	FDR
GOTERM_BP_FAT	GO:0031099~regeneration	5	0.491159	0.0219104	1419088_AT, 1437122_AT, 1441281_S_AT, 1417399_AT, 1415800_AT	648	23	13588	4.55851	1	0.458965	32.2767
GOTERM_BP_FAT	GO:0048589~developmental growth	9	0.884086	0.103722	1419088_AT, 1415923_AT, 1419519_AT, 1437122_AT, 1441281_S_AT, 1437250_AT, 1422912_AT, 1427048_AT, 1415800_AT	648	100	13588	1.88722	1	0.764084	85.4334
GOTERM_BP_FAT	GO:0042246~tissue regeneration	3	0.294695	0.108979	1419088_AT, 1441281_S_AT, 1415800_AT	648	12	13588	5.24228	1	0.772775	86.8655
GOTERM_BP_FAT	GO:0042060~wound healing	7	0.687623	0.443856	1417018_AT, 1421287_A_AT, 1450852_S_AT, 1419088_AT, 1416625_AT, 1441281_S_AT, 1415800_AT	648	112	13588	1.31057	1	0.981665	99.9967
Annotation Cluster 67	Enrichment Score: 0.987162781719094
Category	Term	Count	%	PValue	Genes	List Total	Pop Hits	Pop Total	Fold Enrichment	Bonferroni	Benjamini	FDR
GOTERM_BP_FAT	GO:0050931~pigment cell differentiation	4	0.392927	0.0443955	1423594_A_AT, 1437122_AT, 1417193_AT, 1437250_AT	648	17	13588	4.93391	1	0.582081	55.0171
GOTERM_BP_FAT	GO:0048066~pigmentation during development	5	0.491159	0.0522991	1448979_AT, 1423594_A_AT, 1437122_AT, 1417193_AT, 1437250_AT	648	30	13588	3.49486	1	0.629514	61.1318
GOTERM_BP_FAT	GO:0030318~melanocyte differentiation	3	0.294695	0.175318	1423594_A_AT, 1437122_AT, 1437250_AT	648	16	13588	3.93171	1	0.849905	96.6327
GOTERM_BP_FAT	GO:0043473~pigmentation	5	0.491159	0.276495	1448979_AT, 1423594_A_AT, 1437122_AT, 1417193_AT, 1437250_AT	648	56	13588	1.87224	1	0.933094	99.6633
Annotation Cluster 68	Enrichment Score: 0.9859446316192787
Category	Term	Count	%	PValue	Genes	List Total	Pop Hits	Pop Total	Fold Enrichment	Bonferroni	Benjamini	FDR
GOTERM_BP_FAT	GO:0051781~positive regulation of cell division	5	0.491159	0.0902459	1423136_AT, 1416006_AT, 1426319_AT, 1451803_A_AT, 1416429_A_AT	648	36	13588	2.91238	1	0.734544	81.06
SP_PIR_KEYWORDS	mitogen	5	0.491159	0.100801	1423136_AT, 1416006_AT, 1426319_AT, 1451803_A_AT, 1416429_A_AT	911	35	17854	2.79975	1	0.576623	77.8827
GOTERM_BP_FAT	GO:0051302~regulation of cell division	5	0.491159	0.121136	1423136_AT, 1416006_AT, 1426319_AT, 1451803_A_AT, 1416429_A_AT	648	40	13588	2.62114	1	0.794692	89.6854
Annotation Cluster 69	Enrichment Score: 0.9730121197980748
Category	Term	Count	%	PValue	Genes	List Total	Pop Hits	Pop Total	Fold Enrichment	Bonferroni	Benjamini	FDR
GOTERM_BP_FAT	GO:0030278~regulation of ossification	7	0.687623	0.0392021	1417426_AT, 1416967_AT, 1423176_AT, 1437122_AT, 1448416_AT, 1440339_AT, 1422912_AT	648	53	13588	2.76951	1	0.562613	50.5168
GOTERM_BP_FAT	GO:0070167~regulation of biomineral formation	3	0.294695	0.175318	1417426_AT, 1448416_AT, 1422912_AT	648	16	13588	3.93171	1	0.849905	96.6327
GOTERM_BP_FAT	GO:0030500~regulation of bone mineralization	3	0.294695	0.175318	1417426_AT, 1448416_AT, 1422912_AT	648	16	13588	3.93171	1	0.849905	96.6327
Annotation Cluster 70	Enrichment Score: 0.9628939262319394
Category	Term	Count	%	PValue	Genes	List Total	Pop Hits	Pop Total	Fold Enrichment	Bonferroni	Benjamini	FDR
GOTERM_BP_FAT	GO:0008610~lipid biosynthetic process	22	2.1611	0.0316889	1429735_AT, 1436038_A_AT, 1416330_AT, 1418780_AT, 1418074_AT, 1418052_AT, 1419499_AT, 1416383_A_AT, 1416023_AT, 1434191_AT, 1428556_AT, 1415964_AT, 1429463_AT, 1417403_AT, 1416999_AT, 1454987_A_AT, 1435446_A_AT, 1416468_AT, 1423828_AT, 1426146_A_AT, 1449964_A_AT, 1438566_AT, 1438936_S_AT	648	285	13588	1.61867	1	0.523482	43.2495
SP_PIR_KEYWORDS	Fatty acid biosynthesis	6	0.589391	0.0835103	1429463_AT, 1454987_A_AT, 1417403_AT, 1423828_AT, 1449964_A_AT, 1415964_AT	911	46	17854	2.55629	1	0.525432	71.0135
GOTERM_BP_FAT	GO:0006633~fatty acid biosynthetic process	8	0.785855	0.0905995	1429463_AT, 1429735_AT, 1454987_A_AT, 1417403_AT, 1423828_AT, 1449964_A_AT, 1434191_AT, 1415964_AT	648	81	13588	2.07103	1	0.733971	81.1891
SP_PIR_KEYWORDS	lipid synthesis	9	0.884086	0.132127	1429463_AT, 1454987_A_AT, 1417403_AT, 1418052_AT, 1423828_AT, 1449964_A_AT, 1416383_A_AT, 1415964_AT, 1425196_A_AT	911	99	17854	1.78166	1	0.650891	86.6325
GOTERM_BP_FAT	GO:0046394~carboxylic acid biosynthetic process	10	0.982318	0.229581	1429463_AT, 1429735_AT, 1417629_AT, 1454987_A_AT, 1417403_AT, 1418780_AT, 1423828_AT, 1449964_A_AT, 1434191_AT, 1415964_AT	648	141	13588	1.48717	1	0.904473	98.9831
GOTERM_BP_FAT	GO:0016053~organic acid biosynthetic process	10	0.982318	0.229581	1429463_AT, 1429735_AT, 1417629_AT, 1454987_A_AT, 1417403_AT, 1418780_AT, 1423828_AT, 1449964_A_AT, 1434191_AT, 1415964_AT	648	141	13588	1.48717	1	0.904473	98.9831
Annotation Cluster 71	Enrichment Score: 0.9569690111530768
Category	Term	Count	%	PValue	Genes	List Total	Pop Hits	Pop Total	Fold Enrichment	Bonferroni	Benjamini	FDR
GOTERM_BP_FAT	GO:0019748~secondary metabolic process	10	0.982318	0.00523912	1423780_AT, 1448754_AT, 1418509_AT, 1416225_AT, 1417103_AT, 1416468_AT, 1431980_A_AT, 1437122_AT, 1419456_AT, 1418601_AT	648	69	13588	3.03901	0.999997	0.234344	8.82691
GOTERM_BP_FAT	GO:0042573~retinoic acid metabolic process	4	0.392927	0.0443955	1448754_AT, 1416225_AT, 1416468_AT, 1418601_AT	648	17	13588	4.93391	1	0.582081	55.0171
GOTERM_BP_FAT	GO:0042445~hormone metabolic process	9	0.884086	0.0645333	1448754_AT, 1439096_AT, 1422645_AT, 1415949_AT, 1454987_A_AT, 1416225_AT, 1416468_AT, 1418601_AT, 1455803_AT	648	90	13588	2.09691	1	0.667065	69.0741
GOTERM_BP_FAT	GO:0042572~retinol metabolic process	3	0.294695	0.0790589	1448754_AT, 1416225_AT, 1416468_AT	648	10	13588	6.29074	1	0.701976	76.5169
GOTERM_BP_FAT	GO:0006766~vitamin metabolic process	7	0.687623	0.109807	1448754_AT, 1416225_AT, 1416468_AT, 1417639_AT, 1415984_AT, 1454748_AT, 1418601_AT	648	69	13588	2.1273	1	0.771953	87.0787
GOTERM_BP_FAT	GO:0006776~vitamin A metabolic process	4	0.392927	0.124446	1448754_AT, 1416225_AT, 1416468_AT, 1418601_AT	648	26	13588	3.22602	1	0.802371	90.3479
GOTERM_BP_FAT	GO:0001523~retinoid metabolic process	4	0.392927	0.146515	1448754_AT, 1416225_AT, 1416468_AT, 1418601_AT	648	28	13588	2.99559	1	0.830216	93.8401
GOTERM_BP_FAT	GO:0016101~diterpenoid metabolic process	4	0.392927	0.146515	1448754_AT, 1416225_AT, 1416468_AT, 1418601_AT	648	28	13588	2.99559	1	0.830216	93.8401
GOTERM_BP_FAT	GO:0010817~regulation of hormone levels	10	0.982318	0.15671	1448754_AT, 1439096_AT, 1422645_AT, 1415949_AT, 1454987_A_AT, 1416225_AT, 1416468_AT, 1418601_AT, 1455803_AT, 1423104_AT	648	128	13588	1.63821	1	0.839921	95.0139
GOTERM_BP_FAT	GO:0006721~terpenoid metabolic process	4	0.392927	0.157995	1448754_AT, 1416225_AT, 1416468_AT, 1418601_AT	648	29	13588	2.89229	1	0.83996	95.1458
GOTERM_BP_FAT	GO:0006720~isoprenoid metabolic process	5	0.491159	0.203731	1448754_AT, 1416225_AT, 1418052_AT, 1416468_AT, 1418601_AT	648	49	13588	2.13971	1	0.882107	98.1827
GOTERM_BP_FAT	GO:0006775~fat-soluble vitamin metabolic process	4	0.392927	0.218896	1448754_AT, 1416225_AT, 1416468_AT, 1418601_AT	648	34	13588	2.46696	1	0.896289	98.7043
GOTERM_BP_FAT	GO:0034754~cellular hormone metabolic process	5	0.491159	0.234268	1448754_AT, 1454987_A_AT, 1416225_AT, 1416468_AT, 1418601_AT	648	52	13588	2.01626	1	0.907974	99.0866
KEGG_PATHWAY	mmu00830:Retinol metabolism	5	0.491159	0.444606	1416225_AT, 1448390_A_AT, 1416468_AT, 1418601_AT, 1428296_AT	288	68	5738	1.46497	1	0.847691	99.9176
Annotation Cluster 72	Enrichment Score: 0.9504536663725808
Category	Term	Count	%	PValue	Genes	List Total	Pop Hits	Pop Total	Fold Enrichment	Bonferroni	Benjamini	FDR
GOTERM_BP_FAT	GO:0015711~organic anion transport	7	0.687623	0.0097107	1434537_AT, 1421225_A_AT, 1428440_AT, 1415802_AT, 1424562_A_AT, 1418030_AT, 1455803_AT, 1433933_S_AT	648	39	13588	3.76369	1	0.323164	15.7742
GOTERM_MF_FAT	GO:0008514~organic anion transmembrane transporter activity	3	0.294695	0.147979	1434537_AT, 1418030_AT, 1455803_AT, 1433933_S_AT	652	14	13288	4.36722	1	0.857784	91.4958
INTERPRO	IPR004156:Organic anion transporter polypeptide OATP	3	0.294695	0.162106	1434537_AT, 1418030_AT, 1455803_AT, 1433933_S_AT	860	15	17763	4.13093	1	0.966759	94.472
GOTERM_BP_FAT	GO:0006820~anion transport	10	0.982318	0.167108	1434537_AT, 1455614_AT, 1421225_A_AT, 1417622_AT, 1428440_AT, 1415802_AT, 1448609_AT, 1424562_A_AT, 1418030_AT, 1455803_AT, 1433933_S_AT	648	130	13588	1.61301	1	0.847794	95.9916
GOTERM_MF_FAT	GO:0008509~anion transmembrane transporter activity	8	0.785855	0.45445	1434537_AT, 1455614_AT, 1421225_A_AT, 1421374_A_AT, 1417622_AT, 1418030_AT, 1455803_AT, 1443870_AT, 1433933_S_AT	652	130	13288	1.25418	1	0.989728	99.9911
Annotation Cluster 73	Enrichment Score: 0.9296611850022817
Category	Term	Count	%	PValue	Genes	List Total	Pop Hits	Pop Total	Fold Enrichment	Bonferroni	Benjamini	FDR
SMART	SM00201:SO	3	0.294695	0.0670507	1417109_AT, 1440339_AT, 1415894_AT	397	10	9131	6.9	1	0.703956	58.8749
INTERPRO	IPR001212:Somatomedin B	3	0.294695	0.0812398	1417109_AT, 1440339_AT, 1415894_AT	860	10	17763	6.1964	1	0.870729	75.0195
GOTERM_MF_FAT	GO:0005044~scavenger receptor activity	4	0.392927	0.298432	1417109_AT, 1419144_AT, 1440339_AT, 1415894_AT	652	39	13288	2.09029	1	0.959787	99.5724
Annotation Cluster 74	Enrichment Score: 0.9289282402546507
Category	Term	Count	%	PValue	Genes	List Total	Pop Hits	Pop Total	Fold Enrichment	Bonferroni	Benjamini	FDR
KEGG_PATHWAY	mmu05410:Hypertrophic cardiomyopathy (HCM)	9	0.884086	0.0577521	1429463_AT, 1448394_AT, 1417307_AT, 1422444_AT, 1419519_AT, 1419667_AT, 1417533_A_AT, 1426285_AT, 1418551_AT	288	84	5738	2.13467	0.999926	0.338881	51.2418
KEGG_PATHWAY	mmu05414:Dilated cardiomyopathy	9	0.884086	0.0881301	1448394_AT, 1417307_AT, 1422444_AT, 1419519_AT, 1419667_AT, 1417533_A_AT, 1418128_AT, 1426285_AT, 1418551_AT	288	92	5738	1.94905	1	0.433196	67.1758
KEGG_PATHWAY	mmu05412:Arrhythmogenic right ventricular cardiomyopathy (ARVC)	6	0.589391	0.321014	1417307_AT, 1422444_AT, 1419667_AT, 1417533_A_AT, 1426285_AT, 1415800_AT	288	75	5738	1.59389	1	0.771193	99.0673
Annotation Cluster 75	Enrichment Score: 0.9260045983998461
Category	Term	Count	%	PValue	Genes	List Total	Pop Hits	Pop Total	Fold Enrichment	Bonferroni	Benjamini	FDR
GOTERM_MF_FAT	GO:0008081~phosphoric diester hydrolase activity	9	0.884086	0.0240863	1425338_AT, 1416999_AT, 1445539_AT, 1448621_A_AT, 1416635_AT, 1452398_AT, 1440339_AT, 1415894_AT, 1433694_AT	652	72	13288	2.54755	1	0.452766	31.2866
GOTERM_MF_FAT	GO:0004767~sphingomyelin phosphodiesterase activity	3	0.294695	0.0427116	1416999_AT, 1448621_A_AT, 1416635_AT	652	7	13288	8.73444	1	0.598804	48.9202
GOTERM_MF_FAT	GO:0004620~phospholipase activity	7	0.687623	0.0872409	1425338_AT, 1416999_AT, 1448621_A_AT, 1416635_AT, 1452398_AT, 1451611_AT, 1452026_A_AT	652	63	13288	2.26449	1	0.767887	75.4595
GOTERM_MF_FAT	GO:0016298~lipase activity	8	0.785855	0.117096	1425338_AT, 1416999_AT, 1426785_S_AT, 1448621_A_AT, 1416635_AT, 1452398_AT, 1451611_AT, 1452026_A_AT	652	84	13288	1.94099	1	0.805845	85.2902
GOTERM_BP_FAT	GO:0006665~sphingolipid metabolic process	5	0.491159	0.341692	1453065_AT, 1416999_AT, 1418074_AT, 1448621_A_AT, 1416635_AT	648	62	13588	1.69106	1	0.957916	99.9361
SP_PIR_KEYWORDS	lipid degradation	4	0.392927	0.77403	1452398_AT, 1415894_AT, 1451611_AT, 1452026_A_AT	911	79	17854	0.992316	1	0.990097	100
Annotation Cluster 76	Enrichment Score: 0.8921536558643379
Category	Term	Count	%	PValue	Genes	List Total	Pop Hits	Pop Total	Fold Enrichment	Bonferroni	Benjamini	FDR
GOTERM_BP_FAT	GO:0046902~regulation of mitochondrial membrane permeability	3	0.294695	0.0523691	1424671_AT, 1437122_AT, 1422470_AT	648	8	13588	7.86343	1	0.627242	61.1823
GOTERM_BP_FAT	GO:0007006~mitochondrial membrane organization	4	0.392927	0.124446	1424223_AT, 1424671_AT, 1437122_AT, 1422470_AT	648	26	13588	3.22602	1	0.802371	90.3479
GOTERM_BP_FAT	GO:0006839~mitochondrial transport	4	0.392927	0.323208	1424671_AT, 1428440_AT, 1437122_AT, 1422470_AT	648	42	13588	1.99706	1	0.950926	99.8959
Annotation Cluster 77	Enrichment Score: 0.8855413072899777
Category	Term	Count	%	PValue	Genes	List Total	Pop Hits	Pop Total	Fold Enrichment	Bonferroni	Benjamini	FDR
GOTERM_CC_FAT	GO:0042598~vesicular fraction	17	1.66994	0.0394981	1415993_AT, 1425338_AT, 1422904_AT, 1417307_AT, 1418780_AT, 1427465_AT, 1428636_AT, 1437122_AT, 1417429_AT, 1417952_AT, 1433694_AT, 1448300_AT, 1422438_AT, 1418142_AT, 1428333_AT, 1428296_AT, 1423104_AT	681	182	12504	1.71506	1	0.333864	42.6719
GOTERM_CC_FAT	GO:0005792~microsome	16	1.57171	0.056412	1415993_AT, 1425338_AT, 1422904_AT, 1417307_AT, 1418780_AT, 1427465_AT, 1437122_AT, 1417429_AT, 1417952_AT, 1433694_AT, 1448300_AT, 1422438_AT, 1418142_AT, 1428333_AT, 1428296_AT, 1423104_AT	681	176	12504	1.6692	1	0.402905	55.1418
GOTERM_CC_FAT	GO:0000267~cell fraction	41	4.0275	0.0999925	1455610_AT, 1422943_A_AT, 1422904_AT, 1417307_AT, 1418780_AT, 1428636_AT, 1427465_AT, 1431980_A_AT, 1449106_AT, 1417952_AT, 1421862_A_AT, 1454987_A_AT, 1418142_AT, 1425895_A_AT, 1420858_AT, 1416455_A_AT, 1417900_A_AT, 1415993_AT, 1416204_AT, 1425338_AT, 1421287_A_AT, 1437122_AT, 1416383_A_AT, 1452398_AT, 1416632_AT, 1417429_AT, 1443870_AT, 1433694_AT, 1416034_AT, 1448300_AT, 1417960_AT, 1422438_A…	681	596	12504	1.2631	1	0.544303	76.6485
SP_PIR_KEYWORDS	microsome	9	0.884086	0.137633	1415993_AT, 1448300_AT, 1422438_AT, 1422904_AT, 1418780_AT, 1428333_AT, 1417429_AT, 1417952_AT, 1428296_AT	911	100	17854	1.76384	1	0.661047	87.7875
GOTERM_CC_FAT	GO:0005626~insoluble fraction	32	3.14342	0.360358	1455610_AT, 1422943_A_AT, 1422904_AT, 1417307_AT, 1418780_AT, 1428636_AT, 1427465_AT, 1417952_AT, 1421862_A_AT, 1454987_A_AT, 1418142_AT, 1416455_A_AT, 1417900_A_AT, 1415993_AT, 1425338_AT, 1437122_AT, 1452398_AT, 1417429_AT, 1443870_AT, 1433694_AT, 1416034_AT, 1448300_AT, 1417960_AT, 1422438_AT, 1416999_AT, 1421594_A_AT, 1417622_AT, 1428333_AT, 1417283_AT, 1423104_AT, 1428296_AT, 1456609_AT	681	528	12504	1.1128	1	0.891642	99.7907
GOTERM_CC_FAT	GO:0005624~membrane fraction	30	2.94695	0.439928	1455610_AT, 1422904_AT, 1417307_AT, 1418780_AT, 1428636_AT, 1427465_AT, 1417952_AT, 1421862_A_AT, 1454987_A_AT, 1418142_AT, 1417900_A_AT, 1415993_AT, 1425338_AT, 1437122_AT, 1452398_AT, 1417429_AT, 1443870_AT, 1433694_AT, 1416034_AT, 1417960_AT, 1448300_AT, 1422438_AT, 1416999_AT, 1421594_A_AT, 1417622_AT, 1428333_AT, 1417283_AT, 1423104_AT, 1428296_AT, 1456609_AT	681	510	12504	1.08007	1	0.928416	99.9666
Annotation Cluster 78	Enrichment Score: 0.8368139684856427
Category	Term	Count	%	PValue	Genes	List Total	Pop Hits	Pop Total	Fold Enrichment	Bonferroni	Benjamini	FDR
GOTERM_BP_FAT	GO:0008015~blood circulation	12	1.17878	0.0165927	1448394_AT, 1423594_A_AT, 1426850_A_AT, 1436739_AT, 1418142_AT, 1427465_AT, 1432466_A_AT, 1448499_A_AT, 1437745_AT, 1417193_AT, 1416454_S_AT, 1418551_AT	648	111	13588	2.26693	1	0.407502	25.4986
GOTERM_BP_FAT	GO:0003013~circulatory system process	12	1.17878	0.0165927	1448394_AT, 1423594_A_AT, 1426850_A_AT, 1436739_AT, 1418142_AT, 1427465_AT, 1432466_A_AT, 1448499_A_AT, 1437745_AT, 1417193_AT, 1416454_S_AT, 1418551_AT	648	111	13588	2.26693	1	0.407502	25.4986
GOTERM_BP_FAT	GO:0008217~regulation of blood pressure	6	0.589391	0.196641	1423594_A_AT, 1436739_AT, 1427465_AT, 1448499_A_AT, 1417193_AT, 1416454_S_AT	648	65	13588	1.93561	1	0.872894	97.8761
GOTERM_BP_FAT	GO:0042311~vasodilation	3	0.294695	0.370608	1418142_AT, 1432466_A_AT, 1417193_AT	648	27	13588	2.3299	1	0.96706	99.971
GOTERM_BP_FAT	GO:0050880~regulation of blood vessel size	4	0.392927	0.402065	1418142_AT, 1432466_A_AT, 1417193_AT, 1416454_S_AT	648	48	13588	1.74743	1	0.974226	99.9882
GOTERM_BP_FAT	GO:0035150~regulation of tube size	4	0.392927	0.402065	1418142_AT, 1432466_A_AT, 1417193_AT, 1416454_S_AT	648	48	13588	1.74743	1	0.974226	99.9882
GOTERM_BP_FAT	GO:0003018~vascular process in circulatory system	4	0.392927	0.427844	1418142_AT, 1432466_A_AT, 1417193_AT, 1416454_S_AT	648	50	13588	1.67753	1	0.978919	99.9946
Annotation Cluster 79	Enrichment Score: 0.7994599656380333
Category	Term	Count	%	PValue	Genes	List Total	Pop Hits	Pop Total	Fold Enrichment	Bonferroni	Benjamini	FDR
KEGG_PATHWAY	mmu04260:Cardiac muscle contraction	9	0.884086	0.0400252	1448394_AT, 1448292_AT, 1422009_AT, 1424364_A_AT, 1418453_A_AT, 1427465_AT, 1435275_AT, 1418709_AT, 1449218_AT	288	78	5738	2.29888	0.998549	0.291061	38.9354
GOTERM_MF_FAT	GO:0015077~monovalent inorganic cation transmembrane transporter activity	9	0.884086	0.0627725	1448292_AT, 1424364_A_AT, 1416020_A_AT, 1427465_AT, 1448211_AT, 1435275_AT, 1418709_AT, 1449218_AT, 1416567_S_AT	652	87	13288	2.10831	1	0.691357	63.1281
GOTERM_MF_FAT	GO:0015078~hydrogen ion transmembrane transporter activity	8	0.785855	0.106555	1448292_AT, 1424364_A_AT, 1416020_A_AT, 1448211_AT, 1435275_AT, 1418709_AT, 1449218_AT, 1416567_S_AT	652	82	13288	1.98833	1	0.800705	82.3423
GOTERM_MF_FAT	GO:0016676~oxidoreductase activity, acting on heme group of donors, oxygen as acceptor	3	0.294695	0.311907	1435275_AT, 1418709_AT, 1449218_AT	652	23	13288	2.65831	1	0.962374	99.6828
GOTERM_MF_FAT	GO:0004129~cytochrome-c oxidase activity	3	0.294695	0.311907	1435275_AT, 1418709_AT, 1449218_AT	652	23	13288	2.65831	1	0.962374	99.6828
GOTERM_MF_FAT	GO:0016675~oxidoreductase activity, acting on heme group of donors	3	0.294695	0.311907	1435275_AT, 1418709_AT, 1449218_AT	652	23	13288	2.65831	1	0.962374	99.6828
GOTERM_MF_FAT	GO:0015002~heme-copper terminal oxidase activity	3	0.294695	0.311907	1435275_AT, 1418709_AT, 1449218_AT	652	23	13288	2.65831	1	0.962374	99.6828
Annotation Cluster 80	Enrichment Score: 0.7903756358026232
Category	Term	Count	%	PValue	Genes	List Total	Pop Hits	Pop Total	Fold Enrichment	Bonferroni	Benjamini	FDR
GOTERM_BP_FAT	GO:0030262~apoptotic nuclear changes	4	0.392927	0.0590048	1416034_AT, 1417956_AT, 1421097_AT, 1422470_AT	648	19	13588	4.41455	1	0.65353	65.6962
GOTERM_BP_FAT	GO:0006308~DNA catabolic process	4	0.392927	0.0755651	1417956_AT, 1421097_AT, 1430135_AT, 1422470_AT	648	21	13588	3.99412	1	0.693777	74.8993
GOTERM_BP_FAT	GO:0006309~DNA fragmentation involved in apoptosis	3	0.294695	0.124886	1417956_AT, 1421097_AT, 1422470_AT	648	13	13588	4.83903	1	0.800388	90.4328
GOTERM_BP_FAT	GO:0006921~cell structure disassembly during apoptosis	3	0.294695	0.158136	1417956_AT, 1421097_AT, 1422470_AT	648	15	13588	4.19383	1	0.838968	95.1602
GOTERM_BP_FAT	GO:0000737~DNA catabolic process, endonucleolytic	3	0.294695	0.158136	1417956_AT, 1421097_AT, 1422470_AT	648	15	13588	4.19383	1	0.838968	95.1602
GOTERM_BP_FAT	GO:0006997~nucleus organization	4	0.392927	0.375967	1416034_AT, 1417956_AT, 1421097_AT, 1422470_AT	648	46	13588	1.8234	1	0.968091	99.975
GOTERM_BP_FAT	GO:0022411~cellular component disassembly	3	0.294695	0.560319	1417956_AT, 1421097_AT, 1422470_AT	648	39	13588	1.61301	1	0.993511	99.9999
Annotation Cluster 81	Enrichment Score: 0.7793674579219755
Category	Term	Count	%	PValue	Genes	List Total	Pop Hits	Pop Total	Fold Enrichment	Bonferroni	Benjamini	FDR
GOTERM_BP_FAT	GO:0051149~positive regulation of muscle cell differentiation	3	0.294695	0.065253	1428662_A_AT, 1423062_AT, 1437122_AT	648	9	13588	6.98971	1	0.666351	69.49
GOTERM_BP_FAT	GO:0051153~regulation of striated muscle cell differentiation	4	0.392927	0.0845297	1428662_A_AT, 1423062_AT, 1437122_AT, 1422912_AT	648	22	13588	3.81257	1	0.720601	78.8537
GOTERM_BP_FAT	GO:0051147~regulation of muscle cell differentiation	4	0.392927	0.135325	1428662_A_AT, 1423062_AT, 1437122_AT, 1422912_AT	648	27	13588	3.10654	1	0.81686	92.2536
GOTERM_BP_FAT	GO:0048742~regulation of skeletal muscle fiber development	3	0.294695	0.175318	1423062_AT, 1437122_AT, 1422912_AT	648	16	13588	3.93171	1	0.849905	96.6327
GOTERM_BP_FAT	GO:0048641~regulation of skeletal muscle tissue development	3	0.294695	0.246168	1423062_AT, 1437122_AT, 1422912_AT	648	20	13588	3.14537	1	0.914781	99.3066
GOTERM_BP_FAT	GO:0016202~regulation of striated muscle tissue development	4	0.392927	0.323208	1423062_AT, 1437122_AT, 1422912_AT, 1415800_AT	648	42	13588	1.99706	1	0.950926	99.8959
GOTERM_BP_FAT	GO:0048634~regulation of muscle development	4	0.392927	0.336434	1423062_AT, 1437122_AT, 1422912_AT, 1415800_AT	648	43	13588	1.95062	1	0.955731	99.9265
Annotation Cluster 82	Enrichment Score: 0.7718935642542012
Category	Term	Count	%	PValue	Genes	List Total	Pop Hits	Pop Total	Fold Enrichment	Bonferroni	Benjamini	FDR
SP_PIR_KEYWORDS	Apoptosis	24	2.35756	0.094615	1424223_AT, 1417426_AT, 1453851_A_AT, 1430135_AT, 1424671_AT, 1435595_AT, 1429265_A_AT, 1418626_A_AT, 1437122_AT, 1421027_A_AT, 1449002_AT, 1417956_AT, 1418648_AT, 1421340_AT, 1423452_AT, 1416271_AT, 1448325_AT, 1460718_S_AT, 1436319_AT, 1422470_AT, 1416041_AT, 1418377_A_AT, 1418571_AT, 1425196_A_AT	911	337	17854	1.39572	1	0.565611	75.6211
GOTERM_BP_FAT	GO:0016265~death	32	3.14342	0.11418	1424223_AT, 1421097_AT, 1430135_AT, 1429265_A_AT, 1448508_AT, 1425895_A_AT, 1448325_AT, 1436319_AT, 1422470_AT, 1417193_AT, 1416041_AT, 1423547_AT, 1418377_A_AT, 1418571_AT, 1447863_S_AT, 1417426_AT, 1453851_A_AT, 1424671_AT, 1435595_AT, 1418626_A_AT, 1437122_AT, 1421027_A_AT, 1449002_AT, 1432372_A_AT, 1417956_AT, 1450852_S_AT, 1416034_AT, 1418648_AT, 1421340_AT, 1423452_AT, 1416271_AT, 1460718_S…	648	519	13588	1.29289	1	0.777242	88.1509
GOTERM_BP_FAT	GO:0006915~apoptosis	27	2.65226	0.217136	1424223_AT, 1421097_AT, 1430135_AT, 1429265_A_AT, 1448508_AT, 1425895_A_AT, 1448325_AT, 1436319_AT, 1422470_AT, 1417193_AT, 1416041_AT, 1418377_A_AT, 1418571_AT, 1417426_AT, 1453851_A_AT, 1424671_AT, 1435595_AT, 1437122_AT, 1421027_A_AT, 1449002_AT, 1416034_AT, 1417956_AT, 1418648_AT, 1421340_AT, 1423452_AT, 1416271_AT, 1460718_S_AT	648	465	13588	1.21756	1	0.895019	98.652
GOTERM_BP_FAT	GO:0008219~cell death	29	2.84872	0.235254	1424223_AT, 1421097_AT, 1430135_AT, 1429265_A_AT, 1448508_AT, 1425895_A_AT, 1448325_AT, 1436319_AT, 1422470_AT, 1417193_AT, 1416041_AT, 1423547_AT, 1418377_A_AT, 1418571_AT, 1417426_AT, 1453851_A_AT, 1424671_AT, 1435595_AT, 1418626_A_AT, 1437122_AT, 1421027_A_AT, 1449002_AT, 1416034_AT, 1417956_AT, 1418648_AT, 1421340_AT, 1423452_AT, 1416271_AT, 1460718_S_AT	648	507	13588	1.19942	1	0.908228	99.1071
GOTERM_BP_FAT	GO:0012501~programmed cell death	27	2.65226	0.250445	1424223_AT, 1421097_AT, 1430135_AT, 1429265_A_AT, 1448508_AT, 1425895_A_AT, 1448325_AT, 1436319_AT, 1422470_AT, 1417193_AT, 1416041_AT, 1418377_A_AT, 1418571_AT, 1417426_AT, 1453851_A_AT, 1424671_AT, 1435595_AT, 1437122_AT, 1421027_A_AT, 1449002_AT, 1416034_AT, 1417956_AT, 1418648_AT, 1421340_AT, 1423452_AT, 1416271_AT, 1460718_S_AT	648	473	13588	1.19697	1	0.916715	99.3727
Annotation Cluster 83	Enrichment Score: 0.7696260327663171
Category	Term	Count	%	PValue	Genes	List Total	Pop Hits	Pop Total	Fold Enrichment	Bonferroni	Benjamini	FDR
KEGG_PATHWAY	mmu04960:Aldosterone-regulated sodium reabsorption	7	0.687623	0.0170602	1422009_AT, 1419519_AT, 1418453_A_AT, 1427465_AT, 1449038_AT, 1416041_AT, 1423104_AT	288	42	5738	3.3206	0.936275	0.19086	18.7612
GOTERM_BP_FAT	GO:0006163~purine nucleotide metabolic process	14	1.37525	0.0420512	1449383_AT, 1428613_AT, 1427465_AT, 1448905_AT, 1418128_AT, 1416395_AT, 1422009_AT, 1420583_A_AT, 1415932_X_AT, 1418453_A_AT, 1416020_A_AT, 1448211_AT, 1427191_AT, 1416567_S_AT	648	160	13588	1.8348	1	0.573539	53.0357
GOTERM_BP_FAT	GO:0044271~nitrogen compound biosynthetic process	22	2.1611	0.0533655	1447863_S_AT, 1428613_AT, 1449383_AT, 1418713_AT, 1418982_AT, 1448905_AT, 1427465_AT, 1418128_AT, 1432372_A_AT, 1422009_AT, 1417629_AT, 1421260_A_AT, 1420583_A_AT, 1429352_AT, 1415932_X_AT, 1416020_A_AT, 1418453_A_AT, 1448211_AT, 1454748_AT, 1455435_S_AT, 1416567_S_AT, 1427191_AT	648	302	13588	1.52755	1	0.628877	61.8941
SP_PIR_KEYWORDS	sodium/potassium transport	3	0.294695	0.0592146	1422009_AT, 1418453_A_AT, 1427465_AT	911	8	17854	7.34934	1	0.451799	57.9705
GOTERM_BP_FAT	GO:0006164~purine nucleotide biosynthetic process	12	1.17878	0.0624115	1422009_AT, 1449383_AT, 1428613_AT, 1415932_X_AT, 1418453_A_AT, 1416020_A_AT, 1448905_AT, 1427465_AT, 1448211_AT, 1418128_AT, 1427191_AT, 1416567_S_AT	648	137	13588	1.83671	1	0.659388	67.8166
GOTERM_MF_FAT	GO:0015077~monovalent inorganic cation transmembrane transporter activity	9	0.884086	0.0627725	1448292_AT, 1424364_A_AT, 1416020_A_AT, 1427465_AT, 1448211_AT, 1435275_AT, 1418709_AT, 1449218_AT, 1416567_S_AT	652	87	13288	2.10831	1	0.691357	63.1281
GOTERM_BP_FAT	GO:0009201~ribonucleoside triphosphate biosynthetic process	9	0.884086	0.075138	1422009_AT, 1428613_AT, 1415932_X_AT, 1418453_A_AT, 1416020_A_AT, 1448905_AT, 1427465_AT, 1448211_AT, 1416567_S_AT	648	93	13588	2.02927	1	0.69614	74.6945
GOTERM_BP_FAT	GO:0009206~purine ribonucleoside triphosphate biosynthetic process	9	0.884086	0.075138	1422009_AT, 1428613_AT, 1415932_X_AT, 1418453_A_AT, 1416020_A_AT, 1448905_AT, 1427465_AT, 1448211_AT, 1416567_S_AT	648	93	13588	2.02927	1	0.69614	74.6945
GOTERM_BP_FAT	GO:0009145~purine nucleoside triphosphate biosynthetic process	9	0.884086	0.0788928	1422009_AT, 1428613_AT, 1415932_X_AT, 1418453_A_AT, 1416020_A_AT, 1448905_AT, 1427465_AT, 1448211_AT, 1416567_S_AT	648	94	13588	2.00768	1	0.703365	76.4423
GOTERM_BP_FAT	GO:0009142~nucleoside triphosphate biosynthetic process	9	0.884086	0.0827577	1422009_AT, 1428613_AT, 1415932_X_AT, 1418453_A_AT, 1416020_A_AT, 1448905_AT, 1427465_AT, 1448211_AT, 1416567_S_AT	648	95	13588	1.98655	1	0.71695	78.1219
GOTERM_MF_FAT	GO:0005391~sodium:potassium-exchanging ATPase activity	3	0.294695	0.0830834	1422009_AT, 1418453_A_AT, 1427465_AT	652	10	13288	6.11411	1	0.757214	73.6817
GOTERM_BP_FAT	GO:0006754~ATP biosynthetic process	8	0.785855	0.0952269	1422009_AT, 1428613_AT, 1415932_X_AT, 1418453_A_AT, 1416020_A_AT, 1427465_AT, 1448211_AT, 1416567_S_AT	648	82	13588	2.04577	1	0.74634	82.8038
GOTERM_MF_FAT	GO:0015078~hydrogen ion transmembrane transporter activity	8	0.785855	0.106555	1448292_AT, 1424364_A_AT, 1416020_A_AT, 1448211_AT, 1435275_AT, 1418709_AT, 1449218_AT, 1416567_S_AT	652	82	13288	1.98833	1	0.800705	82.3423
GOTERM_BP_FAT	GO:0009205~purine ribonucleoside triphosphate metabolic process	9	0.884086	0.108239	1422009_AT, 1428613_AT, 1415932_X_AT, 1418453_A_AT, 1416020_A_AT, 1448905_AT, 1427465_AT, 1448211_AT, 1416567_S_AT	648	101	13588	1.86854	1	0.772122	86.6724
GOTERM_BP_FAT	GO:0009199~ribonucleoside triphosphate metabolic process	9	0.884086	0.112863	1422009_AT, 1428613_AT, 1415932_X_AT, 1418453_A_AT, 1416020_A_AT, 1448905_AT, 1427465_AT, 1448211_AT, 1416567_S_AT	648	102	13588	1.85022	1	0.778252	87.8372
GOTERM_BP_FAT	GO:0009165~nucleotide biosynthetic process	13	1.27701	0.126864	1449383_AT, 1428613_AT, 1427465_AT, 1448905_AT, 1418128_AT, 1422009_AT, 1415932_X_AT, 1418453_A_AT, 1416020_A_AT, 1448211_AT, 1454748_AT, 1427191_AT, 1416567_S_AT	648	174	13588	1.56666	1	0.802624	90.8062
GOTERM_BP_FAT	GO:0006119~oxidative phosphorylation	6	0.589391	0.126893	1448292_AT, 1424364_A_AT, 1416020_A_AT, 1448211_AT, 1427282_A_AT, 1416567_S_AT	648	56	13588	2.24669	1	0.801135	90.8116
GOTERM_BP_FAT	GO:0009144~purine nucleoside triphosphate metabolic process	9	0.884086	0.132402	1422009_AT, 1428613_AT, 1415932_X_AT, 1418453_A_AT, 1416020_A_AT, 1448905_AT, 1427465_AT, 1448211_AT, 1416567_S_AT	648	106	13588	1.7804	1	0.812529	91.7798
GOTERM_BP_FAT	GO:0046034~ATP metabolic process	8	0.785855	0.13677	1422009_AT, 1428613_AT, 1415932_X_AT, 1418453_A_AT, 1416020_A_AT, 1427465_AT, 1448211_AT, 1416567_S_AT	648	90	13588	1.86392	1	0.817457	92.4783
GOTERM_BP_FAT	GO:0009152~purine ribonucleotide biosynthetic process	9	0.884086	0.137541	1422009_AT, 1428613_AT, 1415932_X_AT, 1418453_A_AT, 1416020_A_AT, 1448905_AT, 1427465_AT, 1448211_AT, 1416567_S_AT	648	107	13588	1.76376	1	0.816407	92.5956
GOTERM_BP_FAT	GO:0034404~nucleobase, nucleoside and nucleotide biosynthetic process	13	1.27701	0.14665	1449383_AT, 1428613_AT, 1427465_AT, 1448905_AT, 1418128_AT, 1422009_AT, 1415932_X_AT, 1418453_A_AT, 1416020_A_AT, 1448211_AT, 1454748_AT, 1427191_AT, 1416567_S_AT	648	179	13588	1.5229	1	0.827757	93.8571
GOTERM_BP_FAT	GO:0034654~nucleobase, nucleoside, nucleotide and nucleic acid biosynthetic process	13	1.27701	0.14665	1449383_AT, 1428613_AT, 1427465_AT, 1448905_AT, 1418128_AT, 1422009_AT, 1415932_X_AT, 1418453_A_AT, 1416020_A_AT, 1448211_AT, 1454748_AT, 1427191_AT, 1416567_S_AT	648	179	13588	1.5229	1	0.827757	93.8571
GOTERM_MF_FAT	GO:0015405~P-P-bond-hydrolysis-driven transmembrane transporter activity	9	0.884086	0.153909	1422009_AT, 1423492_AT, 1416679_AT, 1415932_X_AT, 1418453_A_AT, 1427465_AT, 1435751_AT, 1443870_AT, 1416567_S_AT	652	107	13288	1.71424	1	0.865413	92.3625
GOTERM_BP_FAT	GO:0009260~ribonucleotide biosynthetic process	9	0.884086	0.159074	1422009_AT, 1428613_AT, 1415932_X_AT, 1418453_A_AT, 1416020_A_AT, 1448905_AT, 1427465_AT, 1448211_AT, 1416567_S_AT	648	111	13588	1.7002	1	0.839589	95.2541
GOTERM_MF_FAT	GO:0015399~primary active transmembrane transporter activity	9	0.884086	0.159607	1422009_AT, 1423492_AT, 1416679_AT, 1415932_X_AT, 1418453_A_AT, 1427465_AT, 1435751_AT, 1443870_AT, 1416567_S_AT	652	108	13288	1.69836	1	0.872084	93.1168
GOTERM_BP_FAT	GO:0009141~nucleoside triphosphate metabolic process	9	0.884086	0.182082	1422009_AT, 1428613_AT, 1415932_X_AT, 1418453_A_AT, 1416020_A_AT, 1448905_AT, 1427465_AT, 1448211_AT, 1416567_S_AT	648	115	13588	1.64106	1	0.859379	97.0868
GOTERM_MF_FAT	GO:0043492~ATPase activity, coupled to movement of substances	8	0.785855	0.197481	1422009_AT, 1416679_AT, 1415932_X_AT, 1418453_A_AT, 1427465_AT, 1435751_AT, 1443870_AT, 1416567_S_AT	652	97	13288	1.68086	1	0.908699	96.6149
GOTERM_MF_FAT	GO:0042626~ATPase activity, coupled to transmembrane movement of substances	8	0.785855	0.197481	1422009_AT, 1416679_AT, 1415932_X_AT, 1418453_A_AT, 1427465_AT, 1435751_AT, 1443870_AT, 1416567_S_AT	652	97	13288	1.68086	1	0.908699	96.6149
GOTERM_MF_FAT	GO:0016820~hydrolase activity, acting on acid anhydrides, catalyzing transmembrane movement of substances	8	0.785855	0.197481	1422009_AT, 1416679_AT, 1415932_X_AT, 1418453_A_AT, 1427465_AT, 1435751_AT, 1443870_AT, 1416567_S_AT	652	97	13288	1.68086	1	0.908699	96.6149
GOTERM_BP_FAT	GO:0009150~purine ribonucleotide metabolic process	9	0.884086	0.206435	1422009_AT, 1428613_AT, 1415932_X_AT, 1418453_A_AT, 1416020_A_AT, 1448905_AT, 1427465_AT, 1448211_AT, 1416567_S_AT	648	119	13588	1.5859	1	0.884859	98.2883
GOTERM_BP_FAT	GO:0009259~ribonucleotide metabolic process	9	0.884086	0.245166	1422009_AT, 1428613_AT, 1415932_X_AT, 1418453_A_AT, 1416020_A_AT, 1448905_AT, 1427465_AT, 1448211_AT, 1416567_S_AT	648	125	13588	1.50978	1	0.914543	99.2902
GOTERM_MF_FAT	GO:0015662~ATPase activity, coupled to transmembrane movement of ions, phosphorylative mechanism	5	0.491159	0.305049	1422009_AT, 1415932_X_AT, 1418453_A_AT, 1427465_AT, 1416567_S_AT	652	57	13288	1.78775	1	0.961735	99.6304
INTERPRO	IPR017940:ABC transporter integral membrane type 1	3	0.294695	0.377917	1416679_AT, 1435751_AT, 1443870_AT	860	27	17763	2.29496	1	0.998593	99.9578
GOTERM_MF_FAT	GO:0042625~ATPase activity, coupled to transmembrane movement of ions	5	0.491159	0.439628	1422009_AT, 1415932_X_AT, 1418453_A_AT, 1427465_AT, 1416567_S_AT	652	69	13288	1.47684	1	0.988419	99.9865
GOTERM_BP_FAT	GO:0006818~hydrogen transport	4	0.392927	0.46573	1424392_AT, 1416020_A_AT, 1448211_AT, 1416567_S_AT	648	53	13588	1.58258	1	0.984861	99.9984
GOTERM_BP_FAT	GO:0015985~energy coupled proton transport, down electrochemical gradient	3	0.294695	0.531621	1416020_A_AT, 1448211_AT, 1416567_S_AT	648	37	13588	1.7002	1	0.991202	99.9998
GOTERM_BP_FAT	GO:0015986~ATP synthesis coupled proton transport	3	0.294695	0.531621	1416020_A_AT, 1448211_AT, 1416567_S_AT	648	37	13588	1.7002	1	0.991202	99.9998
GOTERM_BP_FAT	GO:0034220~ion transmembrane transport	3	0.294695	0.600965	1416020_A_AT, 1448211_AT, 1416567_S_AT	648	42	13588	1.4978	1	0.995664	100
GOTERM_CC_FAT	GO:0016469~proton-transporting two-sector ATPase complex	3	0.294695	0.674285	1416020_A_AT, 1448211_AT, 1416567_S_AT	681	42	12504	1.31152	1	0.984119	100
SP_PIR_KEYWORDS	Hydrogen ion transport	3	0.294695	0.675855	1416020_A_AT, 1448211_AT, 1416567_S_AT	911	45	17854	1.30655	1	0.978444	100
GOTERM_BP_FAT	GO:0015992~proton transport	3	0.294695	0.715794	1416020_A_AT, 1448211_AT, 1416567_S_AT	648	52	13588	1.20976	1	0.99868	100
GOTERM_MF_FAT	GO:0042623~ATPase activity, coupled	9	0.884086	0.86056	1422009_AT, 1416679_AT, 1415932_X_AT, 1418453_A_AT, 1427465_AT, 1437745_AT, 1435751_AT, 1443870_AT, 1416567_S_AT	652	223	13288	0.822526	1	0.999976	100
GOTERM_MF_FAT	GO:0016887~ATPase activity	11	1.08055	0.887726	1422009_AT, 1416679_AT, 1415932_X_AT, 1418453_A_AT, 1427465_AT, 1440879_AT, 1437745_AT, 1435751_AT, 1443870_AT, 1427371_AT, 1416567_S_AT	652	281	13288	0.797808	1	0.999989	100
Annotation Cluster 84	Enrichment Score: 0.751587638430944
Category	Term	Count	%	PValue	Genes	List Total	Pop Hits	Pop Total	Fold Enrichment	Bonferroni	Benjamini	FDR
SP_PIR_KEYWORDS	Secreted	93	9.13556	0.00979331	1419292_AT, 1419595_A_AT, 1448377_AT, 1416625_AT, 1416953_AT, 1422603_AT, 1426851_A_AT, 1419662_AT, 1416749_AT, 1415939_AT, 1449106_AT, 1416371_AT, 1434758_AT, 1449254_AT, 1427183_AT, 1417962_S_AT, 1419088_AT, 1426319_AT, 1428739_AT, 1416335_AT, 1448416_AT, 1415894_AT, 1417399_AT, 1417426_AT, 1421088_AT, 1417574_AT, 1423606_AT, 1421441_AT, 1415812_AT, 1423062_AT, 1416666_AT, 1422912_AT, 1415871_A…	911	1420	17854	1.28355	0.988417	0.138093	13.0429
SP_PIR_KEYWORDS	signal	175	17.1906	0.0224298	1433776_AT, 1424214_AT, 1419292_AT, 1424394_AT, 1436867_AT, 1448377_AT, 1416625_AT, 1430135_AT, 1433891_AT, 1419662_AT, 1429265_A_AT, 1415939_AT, 1417185_AT, 1416749_AT, 1434758_AT, 1449254_AT, 1416072_AT, 1425582_A_AT, 1422645_AT, 1417962_S_AT, 1419088_AT, 1421374_A_AT, 1434210_S_AT, 1417481_AT, 1418912_AT, 1416803_AT, 1435603_AT, 1417399_AT, 1415894_AT, 1423547_AT, 1417426_AT, 1416357_A_AT, 142…	911	2970	17854	1.15478	0.999966	0.254434	27.5403
GOTERM_CC_FAT	GO:0005576~extracellular region	105	10.3143	0.0816695	1419292_AT, 1416625_AT, 1448377_AT, 1427053_AT, 1419662_AT, 1416749_AT, 1415939_AT, 1449254_AT, 1434758_AT, 1419088_AT, 1417962_S_AT, 1415894_AT, 1417399_AT, 1417426_AT, 1421088_AT, 1423606_AT, 1415812_AT, 1423062_AT, 1416666_AT, 1428853_AT, 1415871_AT, 1450716_AT, 1441850_X_AT, 1417389_AT, 1450759_AT, 1452590_A_AT, 1438936_S_AT, 1416221_AT, 1423607_AT, 1452026_A_AT, 1417393_A_AT, 1416114_AT, 141…	681	1680	12504	1.14758	1	0.484212	69.1568
UP_SEQ_FEATURE	signal peptide	175	17.1906	0.287738	1433776_AT, 1424214_AT, 1419292_AT, 1424394_AT, 1436867_AT, 1448377_AT, 1416625_AT, 1430135_AT, 1433891_AT, 1419662_AT, 1429265_A_AT, 1415939_AT, 1417185_AT, 1416749_AT, 1434758_AT, 1449254_AT, 1416072_AT, 1425582_A_AT, 1422645_AT, 1417962_S_AT, 1419088_AT, 1421374_A_AT, 1434210_S_AT, 1417481_AT, 1418912_AT, 1416803_AT, 1435603_AT, 1417399_AT, 1415894_AT, 1423547_AT, 1417426_AT, 1416357_A_AT, 142…	905	2963	16021	1.04556	1	0.999988	99.7199
SP_PIR_KEYWORDS	disulfide bond	128	12.5737	0.472467	1416330_AT, 1448377_AT, 1425755_AT, 1416625_AT, 1430135_AT, 1419662_AT, 1415939_AT, 1417185_AT, 1434758_AT, 1422645_AT, 1419088_AT, 1417962_S_AT, 1434210_S_AT, 1417481_AT, 1435603_AT, 1438566_AT, 1415894_AT, 1417399_AT, 1423547_AT, 1417426_AT, 1416357_A_AT, 1423606_AT, 1421571_A_AT, 1415812_AT, 1423062_AT, 1448696_AT, 1428804_AT, 1415871_AT, 1450716_AT, 1422009_AT, 1441850_X_AT, 1450759_AT, 14180…	911	2469	17854	1.01603	1	0.928192	99.9886
SP_PIR_KEYWORDS	glycoprotein	185	18.1729	0.506652	1424214_AT, 1434537_AT, 1421225_A_AT, 1436867_AT, 1416625_AT, 1416203_AT, 1430135_AT, 1433891_AT, 1419662_AT, 1442823_AT, 1429265_A_AT, 1415939_AT, 1417185_AT, 1416872_AT, 1418128_AT, 1434758_AT, 1449254_AT, 1416072_AT, 1425582_A_AT, 1422645_AT, 1417962_S_AT, 1434210_S_AT, 1424338_AT, 1418912_AT, 1416803_AT, 1435603_AT, 1438566_AT, 1417399_AT, 1415894_AT, 1418643_AT, 1417426_AT, 1416357_A_AT, 142…	911	3600	17854	1.00713	1	0.941129	99.9956
UP_SEQ_FEATURE	disulfide bond	126	12.3772	0.82549	1416330_AT, 1448377_AT, 1425755_AT, 1416625_AT, 1430135_AT, 1419662_AT, 1415939_AT, 1417185_AT, 1434758_AT, 1422645_AT, 1419088_AT, 1417962_S_AT, 1434210_S_AT, 1417481_AT, 1435603_AT, 1438566_AT, 1415894_AT, 1417399_AT, 1423547_AT, 1417426_AT, 1416357_A_AT, 1423606_AT, 1421571_A_AT, 1415812_AT, 1423062_AT, 1448696_AT, 1428804_AT, 1415871_AT, 1450716_AT, 1422009_AT, 1441850_X_AT, 1450759_AT, 14180…	905	2379	16021	0.937599	1	1	100
UP_SEQ_FEATURE	glycosylation site:N-linked (GlcNAc...)	176	17.2888	0.952126	1424214_AT, 1434537_AT, 1421225_A_AT, 1436867_AT, 1416625_AT, 1416203_AT, 1430135_AT, 1433891_AT, 1419662_AT, 1429265_A_AT, 1415939_AT, 1416872_AT, 1418128_AT, 1434758_AT, 1449254_AT, 1416072_AT, 1425582_A_AT, 1422645_AT, 1417962_S_AT, 1434210_S_AT, 1424338_AT, 1418912_AT, 1416803_AT, 1435603_AT, 1438566_AT, 1417399_AT, 1415894_AT, 1418643_AT, 1416357_A_AT, 1422780_AT, 1454654_AT, 1421088_AT, 142…	905	3444	16021	0.904671	1	1	100
Annotation Cluster 85	Enrichment Score: 0.7466906279216333
Category	Term	Count	%	PValue	Genes	List Total	Pop Hits	Pop Total	Fold Enrichment	Bonferroni	Benjamini	FDR
SP_PIR_KEYWORDS	vitamin c	4	0.392927	0.0608162	1416686_AT, 1418648_AT, 1460194_AT, 1423785_AT	911	18	17854	4.35517	1	0.446862	58.9752
GOTERM_MF_FAT	GO:0031418~L-ascorbic acid binding	4	0.392927	0.0717782	1416686_AT, 1418648_AT, 1460194_AT, 1423785_AT	652	20	13288	4.07607	1	0.725603	68.2194
SMART	SM00702:P4Hc	3	0.294695	0.151118	1416686_AT, 1418648_AT, 1423785_AT	397	16	9131	4.3125	1	0.845525	87.7238
INTERPRO	IPR005123:Oxoglutarate and iron-dependent oxygenase	3	0.294695	0.179635	1416686_AT, 1418648_AT, 1423785_AT	860	16	17763	3.87275	1	0.971373	96.0893
INTERPRO	IPR006620:Prolyl 4-hydroxylase, alpha subunit	3	0.294695	0.179635	1416686_AT, 1418648_AT, 1423785_AT	860	16	17763	3.87275	1	0.971373	96.0893
GOTERM_MF_FAT	GO:0016702~oxidoreductase activity, acting on single donors with incorporation of molecular oxygen, incorporation of two atoms of oxygen	6	0.589391	0.239649	1416686_AT, 1418648_AT, 1428394_AT, 1460194_AT, 1423785_AT, 1448842_AT	652	68	13288	1.79827	1	0.936711	98.5249
GOTERM_MF_FAT	GO:0016701~oxidoreductase activity, acting on single donors with incorporation of molecular oxygen	6	0.589391	0.248895	1416686_AT, 1418648_AT, 1428394_AT, 1460194_AT, 1423785_AT, 1448842_AT	652	69	13288	1.77221	1	0.942048	98.7781
UP_SEQ_FEATURE	metal ion-binding site:Iron	5	0.491159	0.272909	1416686_AT, 1418648_AT, 1428394_AT, 1460194_AT, 1423785_AT	905	47	16021	1.88327	1	0.999983	99.5997
SP_PIR_KEYWORDS	dioxygenase	6	0.589391	0.295006	1416686_AT, 1418648_AT, 1428394_AT, 1460194_AT, 1423785_AT, 1448842_AT	911	71	17854	1.65619	1	0.844791	99.3015
UP_SEQ_FEATURE	domain:Fe2OG dioxygenase	3	0.294695	0.333843	1416686_AT, 1418648_AT, 1423785_AT	905	21	16021	2.52897	1	0.999996	99.9121
Annotation Cluster 86	Enrichment Score: 0.7463138677807776
Category	Term	Count	%	PValue	Genes	List Total	Pop Hits	Pop Total	Fold Enrichment	Bonferroni	Benjamini	FDR
GOTERM_BP_FAT	GO:0045597~positive regulation of cell differentiation	14	1.37525	0.0748224	1428662_A_AT, 1435290_X_AT, 1426725_S_AT, 1449130_AT, 1418626_A_AT, 1423062_AT, 1437122_AT, 1435272_AT, 1418517_AT, 1422912_AT, 1427100_AT, 1416967_AT, 1427048_AT, 1418571_AT	648	175	13588	1.67753	1	0.696825	74.5421
GOTERM_BP_FAT	GO:0060284~regulation of cell development	12	1.17878	0.13739	1416034_AT, 1427100_AT, 1416967_AT, 1443260_AT, 1423062_AT, 1437122_AT, 1425620_AT, 1423135_AT, 1418517_AT, 1422912_AT, 1427048_AT, 1418571_AT	648	159	13588	1.58258	1	0.817501	92.5728
GOTERM_BP_FAT	GO:0051094~positive regulation of developmental process	15	1.47348	0.142694	1428662_A_AT, 1435290_X_AT, 1426725_S_AT, 1449130_AT, 1418626_A_AT, 1423062_AT, 1435272_AT, 1437122_AT, 1418517_AT, 1422912_AT, 1415800_AT, 1427100_AT, 1416967_AT, 1427048_AT, 1418571_AT	648	214	13588	1.4698	1	0.824336	93.3365
GOTERM_BP_FAT	GO:0051960~regulation of nervous system development	11	1.08055	0.168226	1425546_A_AT, 1416034_AT, 1427100_AT, 1416967_AT, 1419519_AT, 1443260_AT, 1437122_AT, 1423135_AT, 1418517_AT, 1427048_AT, 1418571_AT	648	148	13588	1.55852	1	0.848683	96.0852
GOTERM_BP_FAT	GO:0010720~positive regulation of cell development	5	0.491159	0.184078	1427100_AT, 1416967_AT, 1437122_AT, 1427048_AT, 1418571_AT	648	47	13588	2.23076	1	0.861603	97.2094
GOTERM_BP_FAT	GO:0045664~regulation of neuron differentiation	8	0.785855	0.212518	1416034_AT, 1427100_AT, 1416967_AT, 1443260_AT, 1437122_AT, 1423135_AT, 1418517_AT, 1418571_AT	648	102	13588	1.64464	1	0.890096	98.505
GOTERM_BP_FAT	GO:0045665~negative regulation of neuron differentiation	4	0.392927	0.218896	1416034_AT, 1416967_AT, 1443260_AT, 1418517_AT	648	34	13588	2.46696	1	0.896289	98.7043
GOTERM_BP_FAT	GO:0050767~regulation of neurogenesis	9	0.884086	0.293032	1416034_AT, 1427100_AT, 1416967_AT, 1443260_AT, 1437122_AT, 1423135_AT, 1418517_AT, 1427048_AT, 1418571_AT	648	132	13588	1.42971	1	0.939294	99.7758
GOTERM_BP_FAT	GO:0050769~positive regulation of neurogenesis	4	0.392927	0.309984	1427100_AT, 1416967_AT, 1427048_AT, 1418571_AT	648	41	13588	2.04577	1	0.945582	99.8537
Annotation Cluster 87	Enrichment Score: 0.7367701739075
Category	Term	Count	%	PValue	Genes	List Total	Pop Hits	Pop Total	Fold Enrichment	Bonferroni	Benjamini	FDR
GOTERM_BP_FAT	GO:0031668~cellular response to extracellular stimulus	6	0.589391	0.061445	1447863_S_AT, 1422645_AT, 1420619_A_AT, 1422444_AT, 1426690_A_AT, 1451290_AT	648	45	13588	2.79588	1	0.661092	67.228
GOTERM_BP_FAT	GO:0042594~response to starvation	4	0.392927	0.157995	1422645_AT, 1426690_A_AT, 1451290_AT, 1415984_AT	648	29	13588	2.89229	1	0.83996	95.1458
GOTERM_BP_FAT	GO:0009267~cellular response to starvation	3	0.294695	0.300006	1422645_AT, 1426690_A_AT, 1451290_AT	648	23	13588	2.7351	1	0.941275	99.8117
GOTERM_BP_FAT	GO:0031669~cellular response to nutrient levels	3	0.294695	0.387846	1422645_AT, 1426690_A_AT, 1451290_AT	648	28	13588	2.24669	1	0.971673	99.9822
Annotation Cluster 88	Enrichment Score: 0.7279769784364023
Category	Term	Count	%	PValue	Genes	List Total	Pop Hits	Pop Total	Fold Enrichment	Bonferroni	Benjamini	FDR
INTERPRO	IPR003096:SM22/calponin	3	0.294695	0.0812398	1455056_AT, 1429012_AT, 1426724_AT	860	10	17763	6.1964	1	0.870729	75.0195
SMART	SM00033:CH	6	0.589391	0.171658	1455794_AT, 1417307_AT, 1455056_AT, 1416759_AT, 1429012_AT, 1426724_AT	397	68	9131	2.02941	1	0.857978	91.0282
INTERPRO	IPR001715:Calponin-like actin-binding	6	0.589391	0.231742	1455794_AT, 1417307_AT, 1455056_AT, 1416759_AT, 1429012_AT, 1426724_AT	860	68	17763	1.82247	1	0.987428	98.6644
UP_SEQ_FEATURE	domain:CH	4	0.392927	0.379014	1455794_AT, 1416759_AT, 1429012_AT, 1426724_AT	905	39	16021	1.81567	1	0.999999	99.974
Annotation Cluster 89	Enrichment Score: 0.7253042952081301
Category	Term	Count	%	PValue	Genes	List Total	Pop Hits	Pop Total	Fold Enrichment	Bonferroni	Benjamini	FDR
SP_PIR_KEYWORDS	cell adhesion	27	2.65226	0.0781056	1417271_A_AT, 1416953_AT, 1418511_AT, 1417533_A_AT, 1418551_AT, 1449254_AT, 1416072_AT, 1419182_AT, 1418571_AT, 1416357_A_AT, 1421287_A_AT, 1434180_AT, 1423606_AT, 1441281_S_AT, 1426285_AT, 1420841_AT, 1415871_AT, 1422009_AT, 1416808_AT, 1420911_A_AT, 1422444_AT, 1449041_A_AT, 1448862_AT, 1416271_AT, 1418394_A_AT, 1448755_AT, 1460356_AT	911	380	17854	1.39251	1	0.514392	68.4893
GOTERM_BP_FAT	GO:0007155~cell adhesion	33	3.24165	0.165862	1417271_A_AT, 1416953_AT, 1418511_AT, 1417533_A_AT, 1418551_AT, 1416072_AT, 1449254_AT, 1425582_A_AT, 1419182_AT, 1435603_AT, 1418571_AT, 1416357_A_AT, 1421287_A_AT, 1434180_AT, 1423606_AT, 1441281_S_AT, 1437122_AT, 1455056_AT, 1418788_AT, 1420841_AT, 1426285_AT, 1415871_AT, 1416034_AT, 1422009_AT, 1416808_AT, 1420911_A_AT, 1422444_AT, 1448862_AT, 1416271_AT, 1418394_A_AT, 1423135_AT, 1448755_AT,…	648	561	13588	1.23348	1	0.849089	95.8847
GOTERM_BP_FAT	GO:0022610~biological adhesion	33	3.24165	0.169154	1417271_A_AT, 1416953_AT, 1418511_AT, 1417533_A_AT, 1418551_AT, 1416072_AT, 1449254_AT, 1425582_A_AT, 1419182_AT, 1435603_AT, 1418571_AT, 1416357_A_AT, 1421287_A_AT, 1434180_AT, 1423606_AT, 1441281_S_AT, 1437122_AT, 1455056_AT, 1418788_AT, 1420841_AT, 1426285_AT, 1415871_AT, 1416034_AT, 1422009_AT, 1416808_AT, 1420911_A_AT, 1422444_AT, 1448862_AT, 1416271_AT, 1418394_A_AT, 1423135_AT, 1448755_AT,…	648	562	13588	1.23128	1	0.848019	96.1614
GOTERM_BP_FAT	GO:0016337~cell-cell adhesion	12	1.17878	0.57289	1416034_AT, 1416357_A_AT, 1425582_A_AT, 1422444_AT, 1416953_AT, 1448862_AT, 1437122_AT, 1455056_AT, 1423135_AT, 1418788_AT, 1460356_AT, 1420841_AT	648	236	13588	1.06623	1	0.994056	100
Annotation Cluster 90	Enrichment Score: 0.708726697511556
Category	Term	Count	%	PValue	Genes	List Total	Pop Hits	Pop Total	Fold Enrichment	Bonferroni	Benjamini	FDR
GOTERM_BP_FAT	GO:0006733~oxidoreduction coenzyme metabolic process	5	0.491159	0.105172	1423780_AT, 1418509_AT, 1428134_AT, 1454748_AT, 1419456_AT	648	38	13588	2.7591	1	0.765419	85.8424
GOTERM_BP_FAT	GO:0043603~cellular amide metabolic process	5	0.491159	0.113029	1423780_AT, 1417962_S_AT, 1418509_AT, 1418982_AT, 1419456_AT	648	39	13588	2.68835	1	0.777053	87.877
GOTERM_BP_FAT	GO:0019362~pyridine nucleotide metabolic process	4	0.392927	0.146515	1423780_AT, 1418509_AT, 1454748_AT, 1419456_AT	648	28	13588	2.99559	1	0.830216	93.8401
GOTERM_BP_FAT	GO:0009820~alkaloid metabolic process	3	0.294695	0.317851	1423780_AT, 1418509_AT, 1419456_AT	648	24	13588	2.62114	1	0.949301	99.8804
GOTERM_BP_FAT	GO:0046496~nicotinamide nucleotide metabolic process	3	0.294695	0.317851	1423780_AT, 1418509_AT, 1419456_AT	648	24	13588	2.62114	1	0.949301	99.8804
GOTERM_BP_FAT	GO:0006769~nicotinamide metabolic process	3	0.294695	0.317851	1423780_AT, 1418509_AT, 1419456_AT	648	24	13588	2.62114	1	0.949301	99.8804
Annotation Cluster 91	Enrichment Score: 0.7071314829563446
Category	Term	Count	%	PValue	Genes	List Total	Pop Hits	Pop Total	Fold Enrichment	Bonferroni	Benjamini	FDR
GOTERM_MF_FAT	GO:0046872~metal ion binding	211	20.7269	0.0331245	1417421_AT, 1421225_A_AT, 1417590_AT, 1449283_A_AT, 1426558_X_AT, 1460194_AT, 1434388_AT, 1439151_AT, 1428431_AT, 1415894_AT, 1417399_AT, 1418377_A_AT, 1417070_AT, 1447863_S_AT, 1416225_AT, 1415812_AT, 1423835_AT, 1417928_AT, 1452398_AT, 1425678_A_AT, 1421014_A_AT, 1450716_AT, 1418648_AT, 1422009_AT, 1460578_AT, 1449041_A_AT, 1460694_S_AT, 1426208_X_AT, 1417203_AT, 1451566_AT, 1422904_AT, 1451332…	652	3850	13288	1.11695	1	0.533985	40.4539
GOTERM_MF_FAT	GO:0043169~cation binding	212	20.8251	0.0375254	1417421_AT, 1421225_A_AT, 1417590_AT, 1449283_A_AT, 1426558_X_AT, 1420654_A_AT, 1460194_AT, 1434388_AT, 1439151_AT, 1428431_AT, 1415894_AT, 1417399_AT, 1418377_A_AT, 1417070_AT, 1447863_S_AT, 1416225_AT, 1415812_AT, 1423835_AT, 1417928_AT, 1452398_AT, 1425678_A_AT, 1421014_A_AT, 1450716_AT, 1418648_AT, 1422009_AT, 1460578_AT, 1449041_A_AT, 1460694_S_AT, 1426208_X_AT, 1417203_AT, 1451566_AT, 14229…	652	3885	13288	1.11213	1	0.560148	44.4912
GOTERM_MF_FAT	GO:0043167~ion binding	213	20.9234	0.0484913	1417421_AT, 1421225_A_AT, 1417590_AT, 1449283_A_AT, 1426558_X_AT, 1420654_A_AT, 1460194_AT, 1434388_AT, 1439151_AT, 1421374_A_AT, 1428431_AT, 1415894_AT, 1417399_AT, 1418377_A_AT, 1417070_AT, 1447863_S_AT, 1416225_AT, 1415812_AT, 1423835_AT, 1417928_AT, 1452398_AT, 1425678_A_AT, 1421014_A_AT, 1450716_AT, 1418648_AT, 1422009_AT, 1460578_AT, 1449041_A_AT, 1460694_S_AT, 1426208_X_AT, 1417203_AT, 145…	652	3934	13288	1.10346	1	0.637239	53.4657
SP_PIR_KEYWORDS	metal-binding	153	15.0295	0.0804221	1454268_A_AT, 1417421_AT, 1417714_X_AT, 1417590_AT, 1449283_A_AT, 1429265_A_AT, 1426558_X_AT, 1431885_A_AT, 1430896_S_AT, 1460194_AT, 1418128_AT, 1434388_AT, 1416849_AT, 1439151_AT, 1435017_AT, 1419088_AT, 1428431_AT, 1417399_AT, 1415894_AT, 1418377_A_AT, 1417070_AT, 1447863_S_AT, 1422528_A_AT, 1416225_AT, 1423835_AT, 1417928_AT, 1421014_A_AT, 1425678_A_AT, 1448696_AT, 1417667_A_AT, 1416759_AT, 1…	911	2682	17854	1.11802	1	0.518274	69.5953
GOTERM_MF_FAT	GO:0046914~transition metal ion binding	130	12.7701	0.469019	1454268_A_AT, 1417421_AT, 1417714_X_AT, 1417590_AT, 1429265_A_AT, 1426558_X_AT, 1430896_S_AT, 1460194_AT, 1434388_AT, 1416849_AT, 1439151_AT, 1435017_AT, 1428431_AT, 1418377_A_AT, 1417070_AT, 1447863_S_AT, 1422528_A_AT, 1416225_AT, 1423835_AT, 1417928_AT, 1448696_AT, 1428853_AT, 1417667_A_AT, 1416759_AT, 1450716_AT, 1418648_AT, 1420731_A_AT, 1441850_X_AT, 1460578_AT, 1449041_A_AT, 1442308_AT, 142…	652	2608	13288	1.01589	1	0.990868	99.9941
SP_PIR_KEYWORDS	zinc	79	7.76031	0.982544	1428564_AT, 1417421_AT, 1417848_AT, 1429265_A_AT, 1426558_X_AT, 1422597_AT, 1438238_AT, 1434388_AT, 1421643_AT, 1455633_AT, 1439151_AT, 1448752_AT, 1422673_AT, 1419088_AT, 1420583_A_AT, 1417311_AT, 1428431_AT, 1423668_AT, 1418377_A_AT, 1442376_AT, 1447863_S_AT, 1422528_A_AT, 1416225_AT, 1424408_AT, 1417872_AT, 1423835_AT, 1427174_AT, 1417928_AT, 1428288_AT, 1416759_AT, 1434689_AT, 1450716_AT, 142…	911	1886	17854	0.820923	1	0.99997	100
GOTERM_MF_FAT	GO:0008270~zinc ion binding	85	8.34971	0.986321	1424223_AT, 1428564_AT, 1417421_AT, 1417848_AT, 1429265_A_AT, 1426558_X_AT, 1422597_AT, 1438238_AT, 1434388_AT, 1421643_AT, 1455633_AT, 1439151_AT, 1448752_AT, 1422673_AT, 1420583_A_AT, 1417311_AT, 1428431_AT, 1423668_AT, 1418377_A_AT, 1442376_AT, 1447863_S_AT, 1422528_A_AT, 1416225_AT, 1424408_AT, 1417872_AT, 1423835_AT, 1427174_AT, 1417928_AT, 1428853_AT, 1417667_A_AT, 1428288_AT, 1416759_AT, 1…	652	2105	13288	0.82296	1	1	100
SP_PIR_KEYWORDS	zinc-finger	39	3.83104	0.999713	1428564_AT, 1438404_AT, 1417848_AT, 1417307_AT, 1422064_A_AT, 1429265_A_AT, 1451332_AT, 1433754_AT, 1436197_AT, 1421643_AT, 1455633_AT, 1418318_AT, 1422673_AT, 1416846_A_AT, 1420583_A_AT, 1428431_AT, 1423668_AT, 1428779_AT, 1437152_AT, 1435397_AT, 1447863_S_AT, 1422528_A_AT, 1424671_AT, 1417872_AT, 1423835_AT, 1448181_AT, 1423785_AT, 1428288_AT, 1434689_AT, 1427177_AT, 1418591_AT, 1424760_A_AT, 1…	911	1204	17854	0.634827	1	1	100
Annotation Cluster 92	Enrichment Score: 0.7042091052562525
Category	Term	Count	%	PValue	Genes	List Total	Pop Hits	Pop Total	Fold Enrichment	Bonferroni	Benjamini	FDR
INTERPRO	IPR011992:EF-Hand type	18	1.76817	0.0495125	1448321_AT, 1417421_AT, 1427483_AT, 1425338_AT, 1417307_AT, 1435389_AT, 1424382_AT, 1448371_AT, 1428440_AT, 1452398_AT, 1448507_AT, 1437869_AT, 1448394_AT, 1416114_AT, 1455091_AT, 1425560_A_AT, 1452670_AT, 1423677_AT, 1423155_AT	860	227	17763	1.63781	1	0.806946	56.4517
INTERPRO	IPR018249:EF-HAND 2	16	1.57171	0.0727951	1417421_AT, 1427483_AT, 1435389_AT, 1416221_AT, 1424382_AT, 1448371_AT, 1428440_AT, 1448507_AT, 1437869_AT, 1448394_AT, 1416114_AT, 1455091_AT, 1425560_A_AT, 1452670_AT, 1416803_AT, 1423677_AT, 1423155_AT	860	205	17763	1.61207	1	0.860273	70.9833
SMART	SM00054:EFh	11	1.08055	0.0739056	1427483_AT, 1448394_AT, 1424382_AT, 1416221_AT, 1448371_AT, 1428440_AT, 1452670_AT, 1416803_AT, 1448507_AT, 1423677_AT, 1423155_AT	397	137	9131	1.84672	1	0.713611	62.5801
INTERPRO	IPR018247:EF-HAND 1	16	1.57171	0.0879401	1417421_AT, 1427483_AT, 1448321_AT, 1435389_AT, 1424382_AT, 1448371_AT, 1428440_AT, 1448507_AT, 1437869_AT, 1427943_AT, 1448394_AT, 1416114_AT, 1455091_AT, 1425560_A_AT, 1452670_AT, 1416803_AT, 1423155_AT	860	211	17763	1.56623	1	0.882884	77.8404
INTERPRO	IPR002048:Calcium-binding EF-hand	11	1.08055	0.127443	1427483_AT, 1448394_AT, 1424382_AT, 1416221_AT, 1448371_AT, 1428440_AT, 1452670_AT, 1416803_AT, 1448507_AT, 1423677_AT, 1423155_AT	860	137	17763	1.6584	1	0.946068	89.2659
COG_ONTOLOGY	Signal transduction mechanisms / Cytoskeleton / Cell division and chromosome partitioning / General function prediction only	5	0.491159	0.177211	1427483_AT, 1448394_AT, 1424382_AT, 1448371_AT, 1452670_AT	95	48	2040	2.23684	0.97978	0.622911	77.3395
UP_SEQ_FEATURE	domain:EF-hand 2	13	1.27701	0.19305	1417421_AT, 1427483_AT, 1448321_AT, 1416221_AT, 1424382_AT, 1448371_AT, 1428440_AT, 1448507_AT, 1448394_AT, 1452670_AT, 1416803_AT, 1423677_AT, 1423155_AT	905	160	16021	1.43835	1	0.999791	97.5658
UP_SEQ_FEATURE	domain:EF-hand 1	13	1.27701	0.198694	1417421_AT, 1427483_AT, 1448321_AT, 1416221_AT, 1424382_AT, 1448371_AT, 1428440_AT, 1448507_AT, 1448394_AT, 1452670_AT, 1416803_AT, 1423677_AT, 1423155_AT	905	161	16021	1.42942	1	0.999814	97.8445
UP_SEQ_FEATURE	domain:EF-hand 3	7	0.687623	0.316742	1427483_AT, 1448394_AT, 1424382_AT, 1448371_AT, 1428440_AT, 1452670_AT, 1423155_AT	905	82	16021	1.51121	1	0.999994	99.8637
UP_SEQ_FEATURE	calcium-binding region:2	8	0.785855	0.427901	1427483_AT, 1448321_AT, 1424382_AT, 1428440_AT, 1416803_AT, 1448507_AT, 1423677_AT, 1423155_AT	905	110	16021	1.28747	1	1	99.9937
UP_SEQ_FEATURE	domain:EF-hand 4	4	0.392927	0.606916	1427483_AT, 1424382_AT, 1428440_AT, 1423155_AT	905	55	16021	1.28747	1	1	100
INTERPRO	IPR018248:EF hand	7	0.687623	0.619673	1427483_AT, 1448394_AT, 1417421_AT, 1448371_AT, 1452670_AT, 1448507_AT, 1423155_AT	860	132	17763	1.09532	1	0.999959	100
UP_SEQ_FEATURE	calcium-binding region:1	7	0.687623	0.677018	1427483_AT, 1448321_AT, 1428440_AT, 1416803_AT, 1448507_AT, 1423677_AT, 1423155_AT	905	120	16021	1.03266	1	1	100
Annotation Cluster 93	Enrichment Score: 0.7036940947358296
Category	Term	Count	%	PValue	Genes	List Total	Pop Hits	Pop Total	Fold Enrichment	Bonferroni	Benjamini	FDR
GOTERM_MF_FAT	GO:0019904~protein domain specific binding	15	1.47348	0.0892645	1429735_AT, 1425745_A_AT, 1417307_AT, 1424826_S_AT, 1442823_AT, 1425620_AT, 1416759_AT, 1417500_A_AT, 1449945_AT, 1421871_AT, 1422644_AT, 1416630_AT, 1416825_AT, 1453317_A_AT, 1423104_AT	652	192	13288	1.59222	1	0.762975	76.2836
GOTERM_MF_FAT	GO:0017124~SH3 domain binding	7	0.687623	0.190046	1429735_AT, 1424826_S_AT, 1442823_AT, 1421871_AT, 1422644_AT, 1453317_A_AT, 1416759_AT	652	79	13288	1.80586	1	0.902144	96.0987
UP_SEQ_FEATURE	short sequence motif:SH3-binding	5	0.491159	0.272909	1429735_AT, 1442823_AT, 1421871_AT, 1422644_AT, 1419137_AT	905	47	16021	1.88327	1	0.999983	99.5997
SP_PIR_KEYWORDS	sh3-binding	5	0.491159	0.330878	1429735_AT, 1442823_AT, 1421871_AT, 1422644_AT, 1453317_A_AT	911	57	17854	1.71914	1	0.867655	99.6673
Annotation Cluster 94	Enrichment Score: 0.7032719620848292
Category	Term	Count	%	PValue	Genes	List Total	Pop Hits	Pop Total	Fold Enrichment	Bonferroni	Benjamini	FDR
GOTERM_BP_FAT	GO:0032835~glomerulus development	3	0.294695	0.0127389	1416808_AT, 1417817_A_AT, 1437122_AT	648	4	13588	15.7269	1	0.356349	20.1919
GOTERM_BP_FAT	GO:0001822~kidney development	8	0.785855	0.247886	1450716_AT, 1416808_AT, 1436739_AT, 1418142_AT, 1417817_A_AT, 1437122_AT, 1418517_AT, 1422912_AT	648	107	13588	1.56779	1	0.915717	99.3339
GOTERM_BP_FAT	GO:0003014~renal system process	3	0.294695	0.317851	1436739_AT, 1437122_AT, 1422912_AT	648	24	13588	2.62114	1	0.949301	99.8804
GOTERM_BP_FAT	GO:0001655~urogenital system development	9	0.884086	0.393828	1450716_AT, 1416808_AT, 1436739_AT, 1418142_AT, 1419519_AT, 1417817_A_AT, 1437122_AT, 1418517_AT, 1422912_AT	648	146	13588	1.29262	1	0.97276	99.985
GOTERM_BP_FAT	GO:0001656~metanephros development	3	0.294695	0.770422	1437122_AT, 1418517_AT, 1422912_AT	648	58	13588	1.08461	1	0.999372	100
Annotation Cluster 95	Enrichment Score: 0.7021685383156757
Category	Term	Count	%	PValue	Genes	List Total	Pop Hits	Pop Total	Fold Enrichment	Bonferroni	Benjamini	FDR
GOTERM_CC_FAT	GO:0001725~stress fiber	4	0.392927	0.126712	1455213_AT, 1434180_AT, 1457465_AT, 1427735_A_AT	681	23	12504	3.19326	1	0.614627	84.5968
GOTERM_CC_FAT	GO:0032432~actin filament bundle	4	0.392927	0.139286	1455213_AT, 1434180_AT, 1457465_AT, 1427735_A_AT	681	24	12504	3.06021	1	0.645152	87.3919
GOTERM_CC_FAT	GO:0042641~actomyosin	4	0.392927	0.17926	1455213_AT, 1434180_AT, 1457465_AT, 1427735_A_AT	681	27	12504	2.72018	1	0.72548	93.461
GOTERM_CC_FAT	GO:0005884~actin filament	3	0.294695	0.49104	1455213_AT, 1434180_AT, 1427735_A_AT	681	30	12504	1.83612	1	0.948375	99.9911
Annotation Cluster 96	Enrichment Score: 0.6962517110885083
Category	Term	Count	%	PValue	Genes	List Total	Pop Hits	Pop Total	Fold Enrichment	Bonferroni	Benjamini	FDR
SP_PIR_KEYWORDS	Chondrogenesis	3	0.294695	0.15772	1450759_AT, 1448416_AT, 1422912_AT	911	14	17854	4.19962	1	0.686674	91.2613
GOTERM_BP_FAT	GO:0051216~cartilage development	7	0.687623	0.166785	1426018_A_AT, 1416953_AT, 1450759_AT, 1417092_AT, 1448416_AT, 1422912_AT, 1421027_A_AT	648	78	13588	1.88185	1	0.848397	95.9642
SP_PIR_KEYWORDS	osteogenesis	3	0.294695	0.309884	1450759_AT, 1448416_AT, 1422912_AT	911	22	17854	2.67249	1	0.855028	99.484
Annotation Cluster 97	Enrichment Score: 0.694625972291611
Category	Term	Count	%	PValue	Genes	List Total	Pop Hits	Pop Total	Fold Enrichment	Bonferroni	Benjamini	FDR
GOTERM_BP_FAT	GO:0042692~muscle cell differentiation	12	1.17878	0.0236197	1426018_A_AT, 1429735_AT, 1448394_AT, 1450852_S_AT, 1420731_A_AT, 1418467_AT, 1427735_A_AT, 1415984_AT, 1422912_AT, 1421027_A_AT, 1416825_AT, 1418551_AT	648	117	13588	2.15068	1	0.480725	34.3289
SP_PIR_KEYWORDS	muscle protein	7	0.687623	0.0406469	1448394_AT, 1448371_AT, 1452670_AT, 1427735_A_AT, 1422743_AT, 1416454_S_AT, 1418551_AT	911	50	17854	2.74375	1	0.367757	44.5264
GOTERM_BP_FAT	GO:0031032~actomyosin structure organization	4	0.392927	0.113904	1448394_AT, 1427735_A_AT, 1418551_AT, 1426724_AT	648	25	13588	3.35506	1	0.778084	88.0858
GOTERM_BP_FAT	GO:0030239~myofibril assembly	3	0.294695	0.228256	1448394_AT, 1427735_A_AT, 1418551_AT	648	19	13588	3.31092	1	0.903819	98.9519
GOTERM_BP_FAT	GO:0055002~striated muscle cell development	5	0.491159	0.255203	1448394_AT, 1450852_S_AT, 1427735_A_AT, 1416825_AT, 1418551_AT	648	54	13588	1.94159	1	0.919035	99.4391
GOTERM_BP_FAT	GO:0055001~muscle cell development	5	0.491159	0.330747	1448394_AT, 1450852_S_AT, 1427735_A_AT, 1416825_AT, 1418551_AT	648	61	13588	1.71878	1	0.954549	99.9145
GOTERM_BP_FAT	GO:0051146~striated muscle cell differentiation	6	0.589391	0.418739	1448394_AT, 1450852_S_AT, 1427735_A_AT, 1415984_AT, 1416825_AT, 1418551_AT	648	89	13588	1.41365	1	0.977721	99.9928
GOTERM_BP_FAT	GO:0048741~skeletal muscle fiber development	3	0.294695	0.454501	1450852_S_AT, 1427735_A_AT, 1416825_AT	648	32	13588	1.96586	1	0.983366	99.9977
GOTERM_BP_FAT	GO:0010927~cellular component assembly involved in morphogenesis	3	0.294695	0.5168	1448394_AT, 1427735_A_AT, 1418551_AT	648	36	13588	1.74743	1	0.989924	99.9997
GOTERM_BP_FAT	GO:0048747~muscle fiber development	3	0.294695	0.546128	1450852_S_AT, 1427735_A_AT, 1416825_AT	648	38	13588	1.65546	1	0.992494	99.9999
Annotation Cluster 98	Enrichment Score: 0.6923792306654268
Category	Term	Count	%	PValue	Genes	List Total	Pop Hits	Pop Total	Fold Enrichment	Bonferroni	Benjamini	FDR
GOTERM_BP_FAT	GO:0042325~regulation of phosphorylation	26	2.55403	0.00307315	1448724_AT, 1416330_AT, 1423136_AT, 1426850_A_AT, 1417962_S_AT, 1417184_S_AT, 1417649_AT, 1418086_AT, 1426319_AT, 1420858_AT, 1417900_A_AT, 1427040_AT, 1453851_A_AT, 1426640_S_AT, 1424470_A_AT, 1423062_AT, 1437122_AT, 1452398_AT, 1422912_AT, 1450852_S_AT, 1416034_AT, 1421340_AT, 1423135_AT, 1430640_A_AT, 1427329_A_AT, 1423104_AT	648	290	13588	1.87999	0.999452	0.18829	5.27072
GOTERM_BP_FAT	GO:0019220~regulation of phosphate metabolic process	26	2.55403	0.00495826	1448724_AT, 1416330_AT, 1423136_AT, 1426850_A_AT, 1417962_S_AT, 1417184_S_AT, 1417649_AT, 1418086_AT, 1426319_AT, 1420858_AT, 1417900_A_AT, 1427040_AT, 1453851_A_AT, 1426640_S_AT, 1424470_A_AT, 1423062_AT, 1437122_AT, 1452398_AT, 1422912_AT, 1450852_S_AT, 1416034_AT, 1421340_AT, 1423135_AT, 1430640_A_AT, 1427329_A_AT, 1423104_AT	648	301	13588	1.81129	0.999995	0.231763	8.37299
GOTERM_BP_FAT	GO:0051174~regulation of phosphorus metabolic process	26	2.55403	0.00495826	1448724_AT, 1416330_AT, 1423136_AT, 1426850_A_AT, 1417962_S_AT, 1417184_S_AT, 1417649_AT, 1418086_AT, 1426319_AT, 1420858_AT, 1417900_A_AT, 1427040_AT, 1453851_A_AT, 1426640_S_AT, 1424470_A_AT, 1423062_AT, 1437122_AT, 1452398_AT, 1422912_AT, 1450852_S_AT, 1416034_AT, 1421340_AT, 1423135_AT, 1430640_A_AT, 1427329_A_AT, 1423104_AT	648	301	13588	1.81129	0.999995	0.231763	8.37299
GOTERM_BP_FAT	GO:0031401~positive regulation of protein modification process	10	0.982318	0.0115717	1416034_AT, 1417962_S_AT, 1416330_AT, 1423136_AT, 1435213_AT, 1424062_AT, 1437122_AT, 1427329_A_AT, 1422912_AT, 1419081_AT	648	78	13588	2.68835	1	0.345493	18.5156
GOTERM_BP_FAT	GO:0031399~regulation of protein modification process	16	1.57171	0.0122741	1416330_AT, 1423136_AT, 1424470_A_AT, 1423062_AT, 1437122_AT, 1422912_AT, 1419081_AT, 1416034_AT, 1417962_S_AT, 1417184_S_AT, 1426319_AT, 1435213_AT, 1424062_AT, 1430640_A_AT, 1427329_A_AT, 1427040_AT	648	165	13588	2.03337	1	0.353852	19.5284
GOTERM_BP_FAT	GO:0001932~regulation of protein amino acid phosphorylation	13	1.27701	0.0126054	1416330_AT, 1423136_AT, 1424470_A_AT, 1437122_AT, 1423062_AT, 1422912_AT, 1416034_AT, 1417962_S_AT, 1417184_S_AT, 1426319_AT, 1430640_A_AT, 1427329_A_AT, 1427040_AT	648	121	13588	2.25288	1	0.357366	20.0019
GOTERM_BP_FAT	GO:0032268~regulation of cellular protein metabolic process	22	2.1611	0.0268763	1429735_AT, 1416330_AT, 1423136_AT, 1416625_AT, 1422528_A_AT, 1424470_A_AT, 1423062_AT, 1437122_AT, 1419081_AT, 1422912_AT, 1416034_AT, 1417184_S_AT, 1417960_AT, 1417962_S_AT, 1426319_AT, 1435213_AT, 1448325_AT, 1424062_AT, 1430640_A_AT, 1427329_A_AT, 1438936_S_AT, 1427040_AT	648	280	13588	1.64757	1	0.503287	38.0774
GOTERM_BP_FAT	GO:0032270~positive regulation of cellular protein metabolic process	10	0.982318	0.0485961	1416034_AT, 1417962_S_AT, 1416330_AT, 1423136_AT, 1435213_AT, 1424062_AT, 1437122_AT, 1427329_A_AT, 1422912_AT, 1419081_AT	648	100	13588	2.09691	1	0.610257	58.3716
GOTERM_BP_FAT	GO:0001934~positive regulation of protein amino acid phosphorylation	7	0.687623	0.0492812	1416034_AT, 1417962_S_AT, 1416330_AT, 1423136_AT, 1437122_AT, 1427329_A_AT, 1422912_AT	648	56	13588	2.62114	1	0.612694	58.8959
GOTERM_BP_FAT	GO:0043406~positive regulation of MAP kinase activity	7	0.687623	0.0608168	1416034_AT, 1416330_AT, 1426850_A_AT, 1421340_AT, 1452398_AT, 1427329_A_AT, 1427040_AT	648	59	13588	2.48786	1	0.659775	66.8399
GOTERM_BP_FAT	GO:0042327~positive regulation of phosphorylation	7	0.687623	0.0649888	1416034_AT, 1417962_S_AT, 1416330_AT, 1423136_AT, 1437122_AT, 1427329_A_AT, 1422912_AT	648	60	13588	2.4464	1	0.667263	69.338
GOTERM_BP_FAT	GO:0010562~positive regulation of phosphorus metabolic process	7	0.687623	0.0738235	1416034_AT, 1417962_S_AT, 1416330_AT, 1423136_AT, 1437122_AT, 1427329_A_AT, 1422912_AT	648	62	13588	2.36748	1	0.69866	74.0542
GOTERM_BP_FAT	GO:0045937~positive regulation of phosphate metabolic process	7	0.687623	0.0738235	1416034_AT, 1417962_S_AT, 1416330_AT, 1423136_AT, 1437122_AT, 1427329_A_AT, 1422912_AT	648	62	13588	2.36748	1	0.69866	74.0542
GOTERM_BP_FAT	GO:0051247~positive regulation of protein metabolic process	10	0.982318	0.0754123	1416034_AT, 1417962_S_AT, 1416330_AT, 1423136_AT, 1435213_AT, 1424062_AT, 1437122_AT, 1427329_A_AT, 1422912_AT, 1419081_AT	648	109	13588	1.92377	1	0.695257	74.8262
GOTERM_BP_FAT	GO:0043405~regulation of MAP kinase activity	8	0.785855	0.104867	1416034_AT, 1416330_AT, 1426640_S_AT, 1426850_A_AT, 1421340_AT, 1452398_AT, 1427329_A_AT, 1427040_AT	648	84	13588	1.99706	1	0.766198	85.7573
GOTERM_BP_FAT	GO:0050731~positive regulation of peptidyl-tyrosine phosphorylation	4	0.392927	0.231618	1416034_AT, 1417962_S_AT, 1416330_AT, 1427329_A_AT	648	35	13588	2.39647	1	0.905907	99.0294
GOTERM_BP_FAT	GO:0050730~regulation of peptidyl-tyrosine phosphorylation	5	0.491159	0.244685	1416034_AT, 1417962_S_AT, 1416330_AT, 1426319_AT, 1427329_A_AT	648	53	13588	1.97822	1	0.914821	99.2822
GOTERM_BP_FAT	GO:0051251~positive regulation of lymphocyte activation	7	0.687623	0.290363	1416034_AT, 1416330_AT, 1435290_X_AT, 1449130_AT, 1435272_AT, 1423135_AT, 1427329_A_AT	648	94	13588	1.56153	1	0.937991	99.7605
GOTERM_BP_FAT	GO:0002696~positive regulation of leukocyte activation	7	0.687623	0.332502	1416034_AT, 1416330_AT, 1435290_X_AT, 1449130_AT, 1435272_AT, 1423135_AT, 1427329_A_AT	648	99	13588	1.48267	1	0.955021	99.9184
GOTERM_BP_FAT	GO:0050867~positive regulation of cell activation	7	0.687623	0.349576	1416034_AT, 1416330_AT, 1435290_X_AT, 1449130_AT, 1435272_AT, 1423135_AT, 1427329_A_AT	648	101	13588	1.45331	1	0.960807	99.9483
GOTERM_BP_FAT	GO:0046635~positive regulation of alpha-beta T cell activation	3	0.294695	0.35318	1416034_AT, 1449130_AT, 1435272_AT	648	26	13588	2.41952	1	0.961649	99.9531
GOTERM_BP_FAT	GO:0050870~positive regulation of T cell activation	5	0.491159	0.385484	1416034_AT, 1435290_X_AT, 1449130_AT, 1435272_AT, 1423135_AT	648	66	13588	1.58857	1	0.971175	99.981
GOTERM_BP_FAT	GO:0045582~positive regulation of T cell differentiation	3	0.294695	0.454501	1435290_X_AT, 1449130_AT, 1435272_AT	648	32	13588	1.96586	1	0.983366	99.9977
GOTERM_BP_FAT	GO:0030888~regulation of B cell proliferation	3	0.294695	0.454501	1416034_AT, 1416330_AT, 1427329_A_AT	648	32	13588	1.96586	1	0.983366	99.9977
GOTERM_BP_FAT	GO:0050778~positive regulation of immune response	8	0.785855	0.471819	1416034_AT, 1447520_AT, 1435290_X_AT, 1416625_AT, 1449130_AT, 1423153_X_AT, 1423135_AT, 1427329_A_AT	648	136	13588	1.23348	1	0.985648	99.9987
GOTERM_BP_FAT	GO:0046634~regulation of alpha-beta T cell activation	3	0.294695	0.486239	1416034_AT, 1449130_AT, 1435272_AT	648	34	13588	1.85022	1	0.987624	99.9992
GOTERM_BP_FAT	GO:0045621~positive regulation of lymphocyte differentiation	3	0.294695	0.486239	1435290_X_AT, 1449130_AT, 1435272_AT	648	34	13588	1.85022	1	0.987624	99.9992
GOTERM_BP_FAT	GO:0045619~regulation of lymphocyte differentiation	4	0.392927	0.526226	1416034_AT, 1435290_X_AT, 1449130_AT, 1435272_AT	648	58	13588	1.44615	1	0.990885	99.9998
GOTERM_BP_FAT	GO:0048584~positive regulation of response to stimulus	10	0.982318	0.52886	1416034_AT, 1447520_AT, 1417500_A_AT, 1435290_X_AT, 1416625_AT, 1417574_AT, 1449130_AT, 1423153_X_AT, 1423135_AT, 1427329_A_AT	648	186	13588	1.12737	1	0.991091	99.9998
GOTERM_BP_FAT	GO:0002694~regulation of leukocyte activation	8	0.785855	0.604274	1416034_AT, 1416330_AT, 1435290_X_AT, 1420583_A_AT, 1449130_AT, 1435272_AT, 1423135_AT, 1427329_A_AT	648	154	13588	1.08931	1	0.995762	100
GOTERM_BP_FAT	GO:0050865~regulation of cell activation	8	0.785855	0.617913	1416034_AT, 1416330_AT, 1435290_X_AT, 1420583_A_AT, 1449130_AT, 1435272_AT, 1423135_AT, 1427329_A_AT	648	156	13588	1.07534	1	0.996263	100
GOTERM_BP_FAT	GO:0030098~lymphocyte differentiation	6	0.589391	0.637672	1453851_A_AT, 1416034_AT, 1419155_A_AT, 1449130_AT, 1435272_AT, 1437122_AT	648	114	13588	1.10364	1	0.996976	100
GOTERM_BP_FAT	GO:0002684~positive regulation of immune system process	10	0.982318	0.652025	1416034_AT, 1447520_AT, 1416330_AT, 1435290_X_AT, 1416625_AT, 1449130_AT, 1423153_X_AT, 1435272_AT, 1423135_AT, 1427329_A_AT	648	206	13588	1.01792	1	0.997207	100
GOTERM_BP_FAT	GO:0045580~regulation of T cell differentiation	3	0.294695	0.673597	1435290_X_AT, 1449130_AT, 1435272_AT	648	48	13588	1.31057	1	0.997752	100
GOTERM_BP_FAT	GO:0002521~leukocyte differentiation	7	0.687623	0.67491	1453851_A_AT, 1416034_AT, 1419155_A_AT, 1449130_AT, 1418982_AT, 1435272_AT, 1437122_AT	648	142	13588	1.03369	1	0.997771	100
GOTERM_BP_FAT	GO:0051249~regulation of lymphocyte activation	7	0.687623	0.687944	1416034_AT, 1416330_AT, 1435290_X_AT, 1449130_AT, 1435272_AT, 1423135_AT, 1427329_A_AT	648	144	13588	1.01933	1	0.998087	100
GOTERM_BP_FAT	GO:0032946~positive regulation of mononuclear cell proliferation	3	0.294695	0.695299	1416034_AT, 1416330_AT, 1427329_A_AT	648	50	13588	1.25815	1	0.998293	100
GOTERM_BP_FAT	GO:0050671~positive regulation of lymphocyte proliferation	3	0.294695	0.695299	1416034_AT, 1416330_AT, 1427329_A_AT	648	50	13588	1.25815	1	0.998293	100
GOTERM_BP_FAT	GO:0070665~positive regulation of leukocyte proliferation	3	0.294695	0.715794	1416034_AT, 1416330_AT, 1427329_A_AT	648	52	13588	1.20976	1	0.99868	100
GOTERM_BP_FAT	GO:0050864~regulation of B cell activation	3	0.294695	0.744356	1416034_AT, 1416330_AT, 1427329_A_AT	648	55	13588	1.14377	1	0.999067	100
GOTERM_BP_FAT	GO:0050863~regulation of T cell activation	5	0.491159	0.762431	1416034_AT, 1435290_X_AT, 1449130_AT, 1435272_AT, 1423135_AT	648	108	13588	0.970793	1	0.999287	100
GOTERM_BP_FAT	GO:0046649~lymphocyte activation	7	0.687623	0.897313	1453851_A_AT, 1416034_AT, 1419155_A_AT, 1417574_AT, 1449130_AT, 1435272_AT, 1437122_AT	648	191	13588	0.768502	1	0.999957	100
GOTERM_BP_FAT	GO:0032944~regulation of mononuclear cell proliferation	3	0.294695	0.899773	1416034_AT, 1416330_AT, 1427329_A_AT	648	80	13588	0.786343	1	0.999961	100
GOTERM_BP_FAT	GO:0050670~regulation of lymphocyte proliferation	3	0.294695	0.899773	1416034_AT, 1416330_AT, 1427329_A_AT	648	80	13588	0.786343	1	0.999961	100
GOTERM_BP_FAT	GO:0070663~regulation of leukocyte proliferation	3	0.294695	0.907313	1416034_AT, 1416330_AT, 1427329_A_AT	648	82	13588	0.767164	1	0.999968	100
GOTERM_MF_FAT	GO:0003823~antigen binding	3	0.294695	0.908594	1435290_X_AT, 1449130_AT, 1427329_A_AT	652	80	13288	0.764264	1	0.999996	100
Annotation Cluster 99	Enrichment Score: 0.6691350428488679
Category	Term	Count	%	PValue	Genes	List Total	Pop Hits	Pop Total	Fold Enrichment	Bonferroni	Benjamini	FDR
GOTERM_MF_FAT	GO:0008092~cytoskeletal protein binding	28	2.75049	0.0782667	1455610_AT, 1417307_AT, 1424826_S_AT, 1424092_AT, 1416995_AT, 1455450_AT, 1418551_AT, 1435551_AT, 1453103_AT, 1416713_AT, 1452879_AT, 1421814_AT, 1438018_AT, 1442376_AT, 1426724_AT, 1424367_A_AT, 1415923_AT, 1418986_A_AT, 1435649_AT, 1418209_A_AT, 1415812_AT, 1455056_AT, 1428650_AT, 1455213_AT, 1460694_S_AT, 1457465_AT, 1451290_AT, 1438936_S_AT, 1416825_AT	652	414	13288	1.37838	1	0.742623	71.4716
SP_PIR_KEYWORDS	cytoskeleton	37	3.63458	0.138376	1455610_AT, 1417307_AT, 1424826_S_AT, 1418658_AT, 1424092_AT, 1455450_AT, 1424842_A_AT, 1424376_AT, 1435551_AT, 1428293_AT, 1453103_AT, 1416713_AT, 1421814_AT, 1438018_AT, 1448643_AT, 1442376_AT, 1418003_AT, 1426640_S_AT, 1434180_AT, 1425745_A_AT, 1418986_A_AT, 1435649_AT, 1418209_A_AT, 1415812_AT, 1416454_S_AT, 1416759_AT, 1436426_AT, 1457218_AT, 1460578_AT, 1449041_A_AT, 1418136_AT, 1460694_S_A…	911	583	17854	1.2438	1	0.657308	87.9362
GOTERM_CC_FAT	GO:0005856~cytoskeleton	53	5.20629	0.907731	1424826_S_AT, 1418658_AT, 1442823_AT, 1448371_AT, 1424376_AT, 1424842_A_AT, 1435551_AT, 1449000_AT, 1448643_AT, 1438018_AT, 1418003_AT, 1442376_AT, 1425338_AT, 1417168_A_AT, 1415923_AT, 1426640_S_AT, 1435649_AT, 1418986_A_AT, 1418209_A_AT, 1415812_AT, 1416454_S_AT, 1416759_AT, 1417960_AT, 1460578_AT, 1460694_S_AT, 1457465_AT, 1417788_AT, 1416825_AT, 1455610_AT, 1417307_AT, 1424092_AT, 1455450_AT,…	681	1122	12504	0.867331	1	0.99943	100
Annotation Cluster 100	Enrichment Score: 0.6633617103370885
Category	Term	Count	%	PValue	Genes	List Total	Pop Hits	Pop Total	Fold Enrichment	Bonferroni	Benjamini	FDR
SMART	SM00093:SERPIN	7	0.687623	0.0779118	1416625_AT, 1450843_A_AT, 1419100_AT, 1416318_AT, 1416666_AT, 1422601_AT, 1422804_AT	397	69	9131	2.33333	1	0.708565	64.6004
GOTERM_MF_FAT	GO:0004857~enzyme inhibitor activity	18	1.76817	0.0877659	1426640_S_AT, 1419100_AT, 1416625_AT, 1448377_AT, 1416318_AT, 1416666_AT, 1422804_AT, 1422601_AT, 1426951_AT, 1419088_AT, 1417649_AT, 1429159_AT, 1450843_A_AT, 1418086_AT, 1422605_AT, 1420858_AT, 1415996_AT, 1456609_AT	652	243	13288	1.50966	1	0.763421	75.6759
GOTERM_MF_FAT	GO:0004867~serine-type endopeptidase inhibitor activity	10	0.982318	0.111046	1448377_AT, 1416625_AT, 1429159_AT, 1450843_A_AT, 1419100_AT, 1416318_AT, 1416666_AT, 1422601_AT, 1422804_AT, 1426951_AT	652	115	13288	1.77221	1	0.803675	83.6599
INTERPRO	IPR000215:Protease inhibitor I4, serpin	7	0.687623	0.116074	1416625_AT, 1450843_A_AT, 1419100_AT, 1416318_AT, 1416666_AT, 1422601_AT, 1422804_AT	860	69	17763	2.0954	1	0.931852	86.732
PIR_SUPERFAMILY	PIRSF001630:serpin	6	0.589391	0.180767	1450843_A_AT, 1419100_AT, 1416318_AT, 1416666_AT, 1422601_AT, 1422804_AT	463	53	8136	1.98932	1	0.999773	94.3599
GOTERM_MF_FAT	GO:0004866~endopeptidase inhibitor activity	11	1.08055	0.265169	1419088_AT, 1448377_AT, 1416625_AT, 1429159_AT, 1450843_A_AT, 1419100_AT, 1416318_AT, 1416666_AT, 1422601_AT, 1422804_AT, 1426951_AT	652	161	13288	1.39245	1	0.951645	99.1278
GOTERM_MF_FAT	GO:0030414~peptidase inhibitor activity	11	1.08055	0.361323	1419088_AT, 1448377_AT, 1416625_AT, 1429159_AT, 1450843_A_AT, 1419100_AT, 1416318_AT, 1416666_AT, 1422601_AT, 1422804_AT, 1426951_AT	652	176	13288	1.27377	1	0.976085	99.8992
SP_PIR_KEYWORDS	Serine protease inhibitor	6	0.589391	0.407118	1448377_AT, 1416625_AT, 1429159_AT, 1419100_AT, 1416318_AT, 1416666_AT	911	82	17854	1.43402	1	0.90412	99.9403
UP_SEQ_FEATURE	site:Reactive bond	4	0.392927	0.568452	1416625_AT, 1419100_AT, 1416318_AT, 1416666_AT	905	52	16021	1.36175	1	1	100
SP_PIR_KEYWORDS	protease inhibitor	6	0.589391	0.658062	1448377_AT, 1416625_AT, 1429159_AT, 1419100_AT, 1416318_AT, 1416666_AT	911	109	17854	1.0788	1	0.976911	100
Annotation Cluster 101	Enrichment Score: 0.6580347714608458
Category	Term	Count	%	PValue	Genes	List Total	Pop Hits	Pop Total	Fold Enrichment	Bonferroni	Benjamini	FDR
SP_PIR_KEYWORDS	Endonuclease	7	0.687623	0.112905	1421097_AT, 1430135_AT, 1422603_AT, 1428326_S_AT, 1434071_A_AT, 1431885_A_AT, 1438936_S_AT	911	65	17854	2.11058	1	0.601418	81.7546
GOTERM_MF_FAT	GO:0004519~endonuclease activity	9	0.884086	0.132134	1422816_A_AT, 1421097_AT, 1430135_AT, 1422603_AT, 1428326_S_AT, 1434071_A_AT, 1431885_A_AT, 1431213_A_AT, 1438936_S_AT	652	103	13288	1.78081	1	0.831211	88.7076
GOTERM_MF_FAT	GO:0004518~nuclease activity	11	1.08055	0.223411	1422816_A_AT, 1421097_AT, 1430135_AT, 1422603_AT, 1428326_S_AT, 1434071_A_AT, 1431885_A_AT, 1440339_AT, 1415894_AT, 1431213_A_AT, 1438936_S_AT	652	154	13288	1.45574	1	0.931402	97.9581
GOTERM_MF_FAT	GO:0016894~endonuclease activity, active with either ribo- or deoxyribonucleic acids and producing 3'-phosphomonoesters	3	0.294695	0.36636	1430135_AT, 1422603_AT, 1438936_S_AT	652	26	13288	2.35158	1	0.976735	99.9108
SP_PIR_KEYWORDS	nuclease	7	0.687623	0.419842	1421097_AT, 1430135_AT, 1422603_AT, 1428326_S_AT, 1434071_A_AT, 1431885_A_AT, 1438936_S_AT	911	102	17854	1.34498	1	0.906661	99.9561
Annotation Cluster 102	Enrichment Score: 0.6477543492759205
Category	Term	Count	%	PValue	Genes	List Total	Pop Hits	Pop Total	Fold Enrichment	Bonferroni	Benjamini	FDR
GOTERM_BP_FAT	GO:0019637~organophosphate metabolic process	14	1.37525	0.0774675	1416204_AT, 1436038_A_AT, 1416330_AT, 1453065_AT, 1419499_AT, 1416635_AT, 1430896_S_AT, 1416023_AT, 1452026_A_AT, 1428556_AT, 1434382_AT, 1429514_AT, 1435446_A_AT, 1426146_A_AT, 1448621_A_AT	648	176	13588	1.668	1	0.698703	75.7927
GOTERM_BP_FAT	GO:0045017~glycerolipid biosynthetic process	6	0.589391	0.141284	1436038_A_AT, 1416330_AT, 1435446_A_AT, 1426146_A_AT, 1416023_AT, 1428556_AT, 1438936_S_AT	648	58	13588	2.16922	1	0.8239	93.141
GOTERM_BP_FAT	GO:0006644~phospholipid metabolic process	12	1.17878	0.154728	1436038_A_AT, 1416330_AT, 1453065_AT, 1419499_AT, 1416635_AT, 1416023_AT, 1452026_A_AT, 1428556_AT, 1434382_AT, 1429514_AT, 1435446_A_AT, 1426146_A_AT, 1448621_A_AT	648	163	13588	1.54374	1	0.838447	94.8036
GOTERM_BP_FAT	GO:0046486~glycerolipid metabolic process	10	0.982318	0.161869	1434382_AT, 1436038_A_AT, 1416330_AT, 1453065_AT, 1435446_A_AT, 1426146_A_AT, 1417639_AT, 1416429_A_AT, 1416023_AT, 1428556_AT, 1438936_S_AT	648	129	13588	1.62551	1	0.842632	95.5241
GOTERM_BP_FAT	GO:0046474~glycerophospholipid biosynthetic process	5	0.491159	0.174497	1436038_A_AT, 1416330_AT, 1435446_A_AT, 1426146_A_AT, 1416023_AT, 1428556_AT	648	46	13588	2.27925	1	0.850735	96.5732
GOTERM_BP_FAT	GO:0006650~glycerophospholipid metabolic process	7	0.687623	0.241496	1434382_AT, 1436038_A_AT, 1416330_AT, 1453065_AT, 1435446_A_AT, 1426146_A_AT, 1416023_AT, 1428556_AT	648	88	13588	1.668	1	0.913152	99.227
GOTERM_BP_FAT	GO:0008654~phospholipid biosynthetic process	6	0.589391	0.361474	1436038_A_AT, 1416330_AT, 1435446_A_AT, 1419499_AT, 1426146_A_AT, 1416023_AT, 1428556_AT	648	83	13588	1.51584	1	0.964098	99.9626
GOTERM_BP_FAT	GO:0046489~phosphoinositide biosynthetic process	3	0.294695	0.438215	1436038_A_AT, 1416330_AT, 1428556_AT	648	31	13588	2.02927	1	0.981001	99.9961
GOTERM_BP_FAT	GO:0030384~phosphoinositide metabolic process	3	0.294695	0.808728	1436038_A_AT, 1416330_AT, 1428556_AT	648	63	13588	0.99853	1	0.999683	100
Annotation Cluster 103	Enrichment Score: 0.6336012753153683
Category	Term	Count	%	PValue	Genes	List Total	Pop Hits	Pop Total	Fold Enrichment	Bonferroni	Benjamini	FDR
SP_PIR_KEYWORDS	iron-sulfur	5	0.491159	0.216761	1416849_AT, 1422816_A_AT, 1435017_AT, 1423907_A_AT, 1449108_AT	911	47	17854	2.08492	1	0.758025	96.8865
GOTERM_MF_FAT	GO:0051540~metal cluster binding	5	0.491159	0.228445	1416849_AT, 1422816_A_AT, 1435017_AT, 1423907_A_AT, 1449108_AT	652	50	13288	2.03804	1	0.931357	98.1525
GOTERM_MF_FAT	GO:0051536~iron-sulfur cluster binding	5	0.491159	0.228445	1416849_AT, 1422816_A_AT, 1435017_AT, 1423907_A_AT, 1449108_AT	652	50	13288	2.03804	1	0.931357	98.1525
GOTERM_MF_FAT	GO:0051537~2 iron, 2 sulfur cluster binding	3	0.294695	0.238059	1416849_AT, 1435017_AT, 1449108_AT	652	19	13288	3.21795	1	0.937541	98.4767
SP_PIR_KEYWORDS	2Fe-2S	3	0.294695	0.252211	1416849_AT, 1435017_AT, 1449108_AT	911	19	17854	3.09446	1	0.807126	98.3871
Annotation Cluster 104	Enrichment Score: 0.6318273419985871
Category	Term	Count	%	PValue	Genes	List Total	Pop Hits	Pop Total	Fold Enrichment	Bonferroni	Benjamini	FDR
GOTERM_BP_FAT	GO:0060415~muscle tissue morphogenesis	3	0.294695	0.21044	1425620_AT, 1423389_AT, 1423785_AT	648	18	13588	3.49486	1	0.888318	98.4341
GOTERM_BP_FAT	GO:0055008~cardiac muscle tissue morphogenesis	3	0.294695	0.21044	1425620_AT, 1423389_AT, 1423785_AT	648	18	13588	3.49486	1	0.888318	98.4341
GOTERM_BP_FAT	GO:0048738~cardiac muscle tissue development	5	0.491159	0.28725	1448394_AT, 1425620_AT, 1415984_AT, 1423389_AT, 1423785_AT	648	57	13588	1.8394	1	0.93692	99.7413
Annotation Cluster 105	Enrichment Score: 0.6271226826402447
Category	Term	Count	%	PValue	Genes	List Total	Pop Hits	Pop Total	Fold Enrichment	Bonferroni	Benjamini	FDR
GOTERM_MF_FAT	GO:0004089~carbonate dehydratase activity	4	0.392927	0.0551831	1424958_AT, 1424223_AT, 1448752_AT, 1430584_S_AT	652	18	13288	4.52897	1	0.651012	58.2553
INTERPRO	IPR018338:Carbonic anhydrase, alpha-class, conserved site	3	0.294695	0.19743	1424958_AT, 1448752_AT, 1430584_S_AT	860	17	17763	3.64494	1	0.978573	97.2689
PIR_SUPERFAMILY	PIRSF001392:carbonate dehydratase	3	0.294695	0.229485	1424958_AT, 1448752_AT, 1430584_S_AT	463	16	8136	3.29482	1	0.999918	97.6702
INTERPRO	IPR001148:Carbonic anhydrase, alpha-class, catalytic domain	3	0.294695	0.233556	1424958_AT, 1448752_AT, 1430584_S_AT	860	19	17763	3.26126	1	0.987234	98.7151
KEGG_PATHWAY	mmu00910:Nitrogen metabolism	3	0.294695	0.320805	1424958_AT, 1448752_AT, 1430584_S_AT	288	23	5738	2.59873	1	0.779012	99.0638
GOTERM_BP_FAT	GO:0006730~one-carbon metabolic process	4	0.392927	0.921845	1424958_AT, 1448752_AT, 1430584_S_AT, 1460519_A_AT	648	117	13588	0.716894	1	0.999984	100
Annotation Cluster 106	Enrichment Score: 0.6220672626154912
Category	Term	Count	%	PValue	Genes	List Total	Pop Hits	Pop Total	Fold Enrichment	Bonferroni	Benjamini	FDR
GOTERM_MF_FAT	GO:0004767~sphingomyelin phosphodiesterase activity	3	0.294695	0.0427116	1416999_AT, 1448621_A_AT, 1416635_AT	652	7	13288	8.73444	1	0.598804	48.9202
GOTERM_BP_FAT	GO:0006643~membrane lipid metabolic process	6	0.589391	0.188307	1453065_AT, 1416999_AT, 1418074_AT, 1448621_A_AT, 1416635_AT, 1438566_AT	648	64	13588	1.96586	1	0.864167	97.4532
GOTERM_BP_FAT	GO:0006665~sphingolipid metabolic process	5	0.491159	0.341692	1453065_AT, 1416999_AT, 1418074_AT, 1448621_A_AT, 1416635_AT	648	62	13588	1.69106	1	0.957916	99.9361
GOTERM_BP_FAT	GO:0006672~ceramide metabolic process	3	0.294695	0.5168	1453065_AT, 1416999_AT, 1418074_AT	648	36	13588	1.74743	1	0.989924	99.9997
GOTERM_BP_FAT	GO:0046519~sphingoid metabolic process	3	0.294695	0.546128	1453065_AT, 1416999_AT, 1418074_AT	648	38	13588	1.65546	1	0.992494	99.9999
Annotation Cluster 107	Enrichment Score: 0.6101969866933866
Category	Term	Count	%	PValue	Genes	List Total	Pop Hits	Pop Total	Fold Enrichment	Bonferroni	Benjamini	FDR
INTERPRO	IPR017981:GPCR, family 2-like	6	0.589391	0.148053	1421118_A_AT, 1417092_AT, 1440225_AT, 1418058_AT, 1418394_A_AT, 1427048_AT	860	58	17763	2.13669	1	0.956248	92.742
SMART	SM00303:GPS	4	0.392927	0.159932	1421118_A_AT, 1440225_AT, 1418058_AT, 1418394_A_AT	397	32	9131	2.875	1	0.849244	89.2592
INTERPRO	IPR000832:GPCR, family 2, secretin-like	5	0.491159	0.162193	1421118_A_AT, 1417092_AT, 1440225_AT, 1418058_AT, 1418394_A_AT	860	44	17763	2.34712	1	0.965172	94.4814
INTERPRO	IPR017983:GPCR, family 2, secretin-like, conserved site	5	0.491159	0.171686	1421118_A_AT, 1417092_AT, 1440225_AT, 1418058_AT, 1418394_A_AT	860	45	17763	2.29496	1	0.969015	95.4206
INTERPRO	IPR000203:GPS	4	0.392927	0.200088	1421118_A_AT, 1440225_AT, 1418058_AT, 1418394_A_AT	860	32	17763	2.58183	1	0.978729	97.4133
PIR_SUPERFAMILY	PIRSF800007:secretin receptor-like G protein-coupled receptors	4	0.392927	0.367208	1421118_A_AT, 1417092_AT, 1440225_AT, 1418394_A_AT	463	38	8136	1.84972	1	1	99.8638
GOTERM_BP_FAT	GO:0007218~neuropeptide signaling pathway	5	0.491159	0.512805	1427038_AT, 1421118_A_AT, 1440225_AT, 1418058_AT, 1418394_A_AT	648	78	13588	1.34418	1	0.989634	99.9997
UP_SEQ_FEATURE	domain:GPS	3	0.294695	0.528712	1421118_A_AT, 1418058_AT, 1418394_A_AT	905	31	16021	1.71317	1	1	99.9998
Annotation Cluster 108	Enrichment Score: 0.6045367372550258
Category	Term	Count	%	PValue	Genes	List Total	Pop Hits	Pop Total	Fold Enrichment	Bonferroni	Benjamini	FDR
GOTERM_MF_FAT	GO:0015293~symporter activity	13	1.27701	0.0285347	1429941_AT, 1421225_A_AT, 1434188_AT, 1417639_AT, 1435387_AT, 1435484_AT, 1453056_AT, 1424308_AT, 1424338_AT, 1429726_AT, 1417622_AT, 1415802_AT, 1426599_A_AT	652	132	13288	2.00716	1	0.490815	35.9519
SP_PIR_KEYWORDS	Symport	11	1.08055	0.0513696	1429941_AT, 1421225_A_AT, 1453056_AT, 1424308_AT, 1424338_AT, 1434188_AT, 1417622_AT, 1429726_AT, 1417639_AT, 1415802_AT, 1435484_AT	911	109	17854	1.9778	1	0.433793	52.7102
SP_PIR_KEYWORDS	sodium/potassium transport	3	0.294695	0.0592146	1422009_AT, 1418453_A_AT, 1427465_AT	911	8	17854	7.34934	1	0.451799	57.9705
GOTERM_MF_FAT	GO:0005391~sodium:potassium-exchanging ATPase activity	3	0.294695	0.0830834	1422009_AT, 1418453_A_AT, 1427465_AT	652	10	13288	6.11411	1	0.757214	73.6817
GOTERM_MF_FAT	GO:0031402~sodium ion binding	9	0.884086	0.132134	1429941_AT, 1422009_AT, 1421225_A_AT, 1424308_AT, 1417622_AT, 1418453_A_AT, 1427465_AT, 1417639_AT, 1435484_AT	652	103	13288	1.78081	1	0.831211	88.7076
SP_PIR_KEYWORDS	Sodium	9	0.884086	0.154823	1429941_AT, 1422009_AT, 1421225_A_AT, 1424308_AT, 1417622_AT, 1418453_A_AT, 1427465_AT, 1417639_AT, 1435484_AT	911	103	17854	1.71247	1	0.684794	90.8246
SP_PIR_KEYWORDS	Sodium transport	9	0.884086	0.205211	1429941_AT, 1422009_AT, 1421225_A_AT, 1424308_AT, 1417622_AT, 1418453_A_AT, 1427465_AT, 1417639_AT, 1435484_AT	911	111	17854	1.58905	1	0.754879	96.167
GOTERM_BP_FAT	GO:0006814~sodium ion transport	9	0.884086	0.245166	1429941_AT, 1422009_AT, 1421225_A_AT, 1424308_AT, 1417622_AT, 1418453_A_AT, 1427465_AT, 1417639_AT, 1435484_AT	648	125	13588	1.50978	1	0.914543	99.2902
GOTERM_MF_FAT	GO:0030955~potassium ion binding	8	0.785855	0.357446	1422009_AT, 1424182_AT, 1424308_AT, 1416647_AT, 1418142_AT, 1417622_AT, 1418453_A_AT, 1427465_AT	652	118	13288	1.38172	1	0.975786	99.8894
SP_PIR_KEYWORDS	potassium	8	0.785855	0.396004	1422009_AT, 1424182_AT, 1424308_AT, 1416647_AT, 1418142_AT, 1417622_AT, 1418453_A_AT, 1427465_AT	911	118	17854	1.32869	1	0.898121	99.9223
GOTERM_MF_FAT	GO:0031420~alkali metal ion binding	12	1.17878	0.42881	1429941_AT, 1422009_AT, 1421225_A_AT, 1424182_AT, 1424308_AT, 1416647_AT, 1418142_AT, 1417622_AT, 1418453_A_AT, 1427465_AT, 1417639_AT, 1435484_AT	652	206	13288	1.18721	1	0.988166	99.9819
GOTERM_BP_FAT	GO:0015672~monovalent inorganic cation transport	16	1.57171	0.483446	1429941_AT, 1421225_A_AT, 1427465_AT, 1417639_AT, 1434881_S_AT, 1435751_AT, 1435484_AT, 1422009_AT, 1424308_AT, 1418142_AT, 1417622_AT, 1418453_A_AT, 1416020_A_AT, 1440355_AT, 1448211_AT, 1416567_S_AT	648	303	13588	1.10728	1	0.987324	99.9991
GOTERM_BP_FAT	GO:0006813~potassium ion transport	9	0.884086	0.495337	1422009_AT, 1424308_AT, 1418142_AT, 1417622_AT, 1418453_A_AT, 1427465_AT, 1440355_AT, 1434881_S_AT, 1435751_AT	648	160	13588	1.17951	1	0.988179	99.9994
GOTERM_BP_FAT	GO:0006811~ion transport	35	3.43811	0.512123	1429941_AT, 1434537_AT, 1421225_A_AT, 1427465_AT, 1428636_AT, 1435751_AT, 1424562_A_AT, 1455614_AT, 1424308_AT, 1421374_A_AT, 1418142_AT, 1416020_A_AT, 1440355_AT, 1415802_AT, 1448211_AT, 1418030_AT, 1423155_AT, 1433933_S_AT, 1425546_A_AT, 1417639_AT, 1428440_AT, 1434881_S_AT, 1448609_AT, 1448696_AT, 1455803_AT, 1443870_AT, 1435484_AT, 1417343_AT, 1450852_S_AT, 1422009_AT, 1441850_X_AT, 1435548_A…	648	712	13588	1.03079	1	0.989665	99.9997
SP_PIR_KEYWORDS	potassium transport	6	0.589391	0.641914	1422009_AT, 1424308_AT, 1418142_AT, 1417622_AT, 1418453_A_AT, 1427465_AT	911	107	17854	1.09897	1	0.975084	100
GOTERM_BP_FAT	GO:0006812~cation transport	24	2.35756	0.656175	1425546_A_AT, 1429941_AT, 1421225_A_AT, 1427465_AT, 1428636_AT, 1417639_AT, 1434881_S_AT, 1435751_AT, 1448696_AT, 1435484_AT, 1450852_S_AT, 1422009_AT, 1441850_X_AT, 1424308_AT, 1435548_AT, 1418142_AT, 1417622_AT, 1416020_A_AT, 1418453_A_AT, 1440355_AT, 1448211_AT, 1452445_AT, 1423155_AT, 1416567_S_AT	648	515	13588	0.977202	1	0.997169	100
GOTERM_BP_FAT	GO:0030001~metal ion transport	20	1.96464	0.71104	1425546_A_AT, 1429941_AT, 1421225_A_AT, 1427465_AT, 1428636_AT, 1417639_AT, 1434881_S_AT, 1435751_AT, 1448696_AT, 1435484_AT, 1450852_S_AT, 1422009_AT, 1441850_X_AT, 1424308_AT, 1435548_AT, 1418142_AT, 1417622_AT, 1418453_A_AT, 1440355_AT, 1423155_AT	648	442	13588	0.94883	1	0.998599	100
SP_PIR_KEYWORDS	ion transport	25	2.4558	0.793624	1429941_AT, 1434537_AT, 1421225_A_AT, 1428636_AT, 1427465_AT, 1455614_AT, 1421374_A_AT, 1424308_AT, 1418142_AT, 1416020_A_AT, 1448211_AT, 1418030_AT, 1433933_S_AT, 1425546_A_AT, 1417639_AT, 1448696_AT, 1455803_AT, 1417343_AT, 1435484_AT, 1422009_AT, 1441850_X_AT, 1435548_AT, 1417622_AT, 1418453_A_AT, 1452445_AT, 1416567_S_AT	911	543	17854	0.902313	1	0.991751	100
Annotation Cluster 109	Enrichment Score: 0.5965580197471873
Category	Term	Count	%	PValue	Genes	List Total	Pop Hits	Pop Total	Fold Enrichment	Bonferroni	Benjamini	FDR
GOTERM_BP_FAT	GO:0006953~acute-phase response	4	0.392927	0.169739	1425546_A_AT, 1447520_AT, 1419100_AT, 1419144_AT	648	30	13588	2.79588	1	0.847913	96.2086
GOTERM_BP_FAT	GO:0002526~acute inflammatory response	7	0.687623	0.188107	1425546_A_AT, 1447520_AT, 1416625_AT, 1419100_AT, 1423153_X_AT, 1448499_A_AT, 1419144_AT	648	81	13588	1.81215	1	0.864912	97.4422
GOTERM_BP_FAT	GO:0006954~inflammatory response	12	1.17878	0.508323	1425546_A_AT, 1416034_AT, 1450852_S_AT, 1447520_AT, 1416625_AT, 1419100_AT, 1450759_AT, 1423153_X_AT, 1448499_A_AT, 1416335_AT, 1419144_AT, 1421991_A_AT	648	225	13588	1.11835	1	0.989396	99.9996
Annotation Cluster 110	Enrichment Score: 0.5941427993635132
Category	Term	Count	%	PValue	Genes	List Total	Pop Hits	Pop Total	Fold Enrichment	Bonferroni	Benjamini	FDR
GOTERM_BP_FAT	GO:0016477~cell migration	17	1.66994	0.110665	1447863_S_AT, 1444232_AT, 1415923_AT, 1417574_AT, 1423594_A_AT, 1416953_AT, 1428650_AT, 1415800_AT, 1448649_AT, 1416072_AT, 1416034_AT, 1447520_AT, 1420696_AT, 1418157_AT, 1422444_AT, 1427048_AT, 1418571_AT	648	240	13588	1.48531	1	0.772983	87.296
GOTERM_BP_FAT	GO:0001764~neuron migration	6	0.589391	0.240053	1444232_AT, 1447863_S_AT, 1415923_AT, 1418157_AT, 1417574_AT, 1415800_AT	648	70	13588	1.79735	1	0.912456	99.2007
GOTERM_BP_FAT	GO:0051674~localization of cell	17	1.66994	0.287166	1447863_S_AT, 1444232_AT, 1415923_AT, 1417574_AT, 1423594_A_AT, 1416953_AT, 1428650_AT, 1415800_AT, 1448649_AT, 1416072_AT, 1416034_AT, 1447520_AT, 1420696_AT, 1418157_AT, 1422444_AT, 1427048_AT, 1418571_AT	648	284	13588	1.25519	1	0.937443	99.7407
GOTERM_BP_FAT	GO:0048870~cell motility	17	1.66994	0.287166	1447863_S_AT, 1444232_AT, 1415923_AT, 1417574_AT, 1423594_A_AT, 1416953_AT, 1428650_AT, 1415800_AT, 1448649_AT, 1416072_AT, 1416034_AT, 1447520_AT, 1420696_AT, 1418157_AT, 1422444_AT, 1427048_AT, 1418571_AT	648	284	13588	1.25519	1	0.937443	99.7407
GOTERM_BP_FAT	GO:0006928~cell motion	19	1.8664	0.488315	1447863_S_AT, 1444232_AT, 1415923_AT, 1417574_AT, 1423594_A_AT, 1416953_AT, 1428650_AT, 1415800_AT, 1448649_AT, 1416072_AT, 1416034_AT, 1447520_AT, 1420696_AT, 1457218_AT, 1418157_AT, 1422444_AT, 1453103_AT, 1442376_AT, 1427048_AT, 1418571_AT	648	367	13588	1.0856	1	0.987806	99.9992
Annotation Cluster 111	Enrichment Score: 0.5915455196841864
Category	Term	Count	%	PValue	Genes	List Total	Pop Hits	Pop Total	Fold Enrichment	Bonferroni	Benjamini	FDR
GOTERM_BP_FAT	GO:0042559~pteridine and derivative biosynthetic process	3	0.294695	0.1413	1418713_AT, 1429352_AT, 1432372_A_AT	648	14	13588	4.49339	1	0.822508	93.1432
GOTERM_BP_FAT	GO:0019438~aromatic compound biosynthetic process	3	0.294695	0.175318	1418713_AT, 1429352_AT, 1432372_A_AT	648	16	13588	3.93171	1	0.849905	96.6327
GOTERM_BP_FAT	GO:0042558~pteridine and derivative metabolic process	3	0.294695	0.246168	1418713_AT, 1429352_AT, 1432372_A_AT	648	20	13588	3.14537	1	0.914781	99.3066
GOTERM_BP_FAT	GO:0018130~heterocycle biosynthetic process	3	0.294695	0.705695	1418713_AT, 1429352_AT, 1432372_A_AT	648	51	13588	1.23348	1	0.998542	100
Annotation Cluster 112	Enrichment Score: 0.5901704413400484
Category	Term	Count	%	PValue	Genes	List Total	Pop Hits	Pop Total	Fold Enrichment	Bonferroni	Benjamini	FDR
GOTERM_BP_FAT	GO:0007044~cell-substrate junction assembly	3	0.294695	0.1413	1437122_AT, 1423135_AT, 1428650_AT	648	14	13588	4.49339	1	0.822508	93.1432
GOTERM_BP_FAT	GO:0034329~cell junction assembly	3	0.294695	0.264126	1437122_AT, 1423135_AT, 1428650_AT	648	21	13588	2.99559	1	0.924936	99.5463
GOTERM_BP_FAT	GO:0034330~cell junction organization	3	0.294695	0.454501	1437122_AT, 1423135_AT, 1428650_AT	648	32	13588	1.96586	1	0.983366	99.9977
Annotation Cluster 113	Enrichment Score: 0.5701296923785328
Category	Term	Count	%	PValue	Genes	List Total	Pop Hits	Pop Total	Fold Enrichment	Bonferroni	Benjamini	FDR
GOTERM_BP_FAT	GO:0008203~cholesterol metabolic process	7	0.687623	0.11557	1429463_AT, 1418780_AT, 1426690_A_AT, 1418052_AT, 1432466_A_AT, 1416429_A_AT, 1417900_A_AT	648	70	13588	2.09691	1	0.77985	88.4738
GOTERM_BP_FAT	GO:0016125~sterol metabolic process	7	0.687623	0.159917	1429463_AT, 1418780_AT, 1426690_A_AT, 1418052_AT, 1432466_A_AT, 1416429_A_AT, 1417900_A_AT	648	77	13588	1.90629	1	0.840016	95.3371
SP_PIR_KEYWORDS	steroid metabolism	4	0.392927	0.31985	1418780_AT, 1426690_A_AT, 1449038_AT, 1417900_A_AT	911	39	17854	2.01008	1	0.859402	99.5803
GOTERM_BP_FAT	GO:0008202~steroid metabolic process	10	0.982318	0.359459	1429463_AT, 1454987_A_AT, 1418780_AT, 1425391_A_AT, 1426690_A_AT, 1418052_AT, 1432466_A_AT, 1449038_AT, 1416429_A_AT, 1417900_A_AT	648	161	13588	1.30243	1	0.963617	99.9605
GOTERM_BP_FAT	GO:0006694~steroid biosynthetic process	4	0.392927	0.663765	1429463_AT, 1454987_A_AT, 1418780_AT, 1418052_AT	648	71	13588	1.18136	1	0.997428	100
Annotation Cluster 114	Enrichment Score: 0.5624517691688472
Category	Term	Count	%	PValue	Genes	List Total	Pop Hits	Pop Total	Fold Enrichment	Bonferroni	Benjamini	FDR
SMART	SM00134:LU	4	0.392927	0.129187	1421571_A_AT, 1417185_AT, 1417283_AT, 1418710_AT	397	29	9131	3.17241	1	0.809849	82.9829
UP_SEQ_FEATURE	lipid moiety-binding region:GPI-anchor amidated glycine	4	0.392927	0.150833	1416034_AT, 1421571_A_AT, 1417185_AT, 1417283_AT	905	24	16021	2.95046	1	0.999065	94.1117
INTERPRO	IPR016054:Ly-6 antigen / uPA receptor -like	4	0.392927	0.163263	1421571_A_AT, 1417185_AT, 1417283_AT, 1418710_AT	860	29	17763	2.84892	1	0.964347	94.5957
PIR_SUPERFAMILY	PIRSF002021:Ly-6-like protein	3	0.294695	0.166217	1421571_A_AT, 1417185_AT, 1417283_AT	463	13	8136	4.05516	1	0.999763	92.7299
UP_SEQ_FEATURE	domain:UPAR/Ly6	4	0.392927	0.178826	1421571_A_AT, 1417185_AT, 1417283_AT, 1418710_AT	905	26	16021	2.7235	1	0.999691	96.7054
INTERPRO	IPR001526:CD59 antigen	4	0.392927	0.225626	1421571_A_AT, 1417185_AT, 1417283_AT, 1418710_AT	860	34	17763	2.42996	1	0.986409	98.4792
UP_SEQ_FEATURE	propeptide:Removed in mature form	16	1.57171	0.260992	1418240_AT, 1421088_AT, 1421571_A_AT, 1417185_AT, 1448942_AT, 1416454_S_AT, 1416034_AT, 1418892_AT, 1417389_AT, 1429413_AT, 1427735_A_AT, 1423135_AT, 1451290_AT, 1427918_A_AT, 1417283_AT, 1418710_AT	905	220	16021	1.28747	1	0.999982	99.4695
SP_PIR_KEYWORDS	gpi-anchor	9	0.884086	0.298145	1416034_AT, 1421088_AT, 1417389_AT, 1421571_A_AT, 1417185_AT, 1429413_AT, 1423135_AT, 1417283_AT, 1418710_AT	911	124	17854	1.42245	1	0.845077	99.3444
INTERPRO	IPR018363:CD59 antigen, conserved site	3	0.294695	0.412526	1421571_A_AT, 1417185_AT, 1418710_AT	860	29	17763	2.13669	1	0.998949	99.9835
GOTERM_CC_FAT	GO:0031225~anchored to membrane	12	1.17878	0.575742	1416034_AT, 1418591_AT, 1421088_AT, 1417389_AT, 1421571_A_AT, 1417185_AT, 1429413_AT, 1451290_AT, 1423135_AT, 1427918_A_AT, 1417283_AT, 1418710_AT	681	207	12504	1.06442	1	0.966703	99.9993
UP_SEQ_FEATURE	lipid moiety-binding region:GPI-anchor amidated serine	4	0.392927	0.606916	1421088_AT, 1417389_AT, 1429413_AT, 1418710_AT	905	55	16021	1.28747	1	1	100
SP_PIR_KEYWORDS	lipoprotein	28	2.75049	0.744077	1418240_AT, 1417185_AT, 1432466_A_AT, 1422743_AT, 1418892_AT, 1436739_AT, 1428615_AT, 1417275_AT, 1429413_AT, 1433626_AT, 1434511_AT, 1417900_A_AT, 1427918_A_AT, 1418710_AT, 1421088_AT, 1418341_AT, 1423594_A_AT, 1421571_A_AT, 1454604_S_AT, 1448942_AT, 1452800_A_AT, 1419985_S_AT, 1416034_AT, 1418591_AT, 1417389_AT, 1451290_AT, 1423135_AT, 1417283_AT	911	589	17854	0.931665	1	0.987064	100
Annotation Cluster 115	Enrichment Score: 0.5557268108293628
Category	Term	Count	%	PValue	Genes	List Total	Pop Hits	Pop Total	Fold Enrichment	Bonferroni	Benjamini	FDR
GOTERM_CC_FAT	GO:0016592~Srb-mediator complex	5	0.491159	0.062958	1421902_AT, 1425806_A_AT, 1416826_A_AT, 1417387_AT, 1421528_A_AT	681	28	12504	3.27879	1	0.423773	59.2525
GOTERM_MF_FAT	GO:0016455~RNA polymerase II transcription mediator activity	3	0.294695	0.293503	1416826_A_AT, 1417387_AT, 1421528_A_AT	652	22	13288	2.77914	1	0.960112	99.5238
GOTERM_MF_FAT	GO:0016251~general RNA polymerase II transcription factor activity	3	0.294695	0.436142	1416826_A_AT, 1417387_AT, 1421528_A_AT	652	30	13288	2.03804	1	0.988352	99.9852
GOTERM_MF_FAT	GO:0003702~RNA polymerase II transcription factor activity	5	0.491159	0.74268	1443260_AT, 1418982_AT, 1416826_A_AT, 1417387_AT, 1421528_A_AT	652	102	13288	0.999038	1	0.99971	100
Annotation Cluster 116	Enrichment Score: 0.5495103853381144
Category	Term	Count	%	PValue	Genes	List Total	Pop Hits	Pop Total	Fold Enrichment	Bonferroni	Benjamini	FDR
GOTERM_BP_FAT	GO:0032844~regulation of homeostatic process	7	0.687623	0.0649888	1425546_A_AT, 1416034_AT, 1450852_S_AT, 1426725_S_AT, 1437122_AT, 1423135_AT, 1423389_AT	648	60	13588	2.4464	1	0.667263	69.338
GOTERM_BP_FAT	GO:0043270~positive regulation of ion transport	3	0.294695	0.246168	1450852_S_AT, 1423135_AT, 1416041_AT	648	20	13588	3.14537	1	0.914781	99.3066
GOTERM_BP_FAT	GO:0010959~regulation of metal ion transport	4	0.392927	0.402065	1450852_S_AT, 1437122_AT, 1423135_AT, 1416041_AT	648	48	13588	1.74743	1	0.974226	99.9882
GOTERM_BP_FAT	GO:0051924~regulation of calcium ion transport	3	0.294695	0.486239	1450852_S_AT, 1437122_AT, 1423135_AT	648	34	13588	1.85022	1	0.987624	99.9992
GOTERM_BP_FAT	GO:0043269~regulation of ion transport	4	0.392927	0.571784	1450852_S_AT, 1437122_AT, 1423135_AT, 1416041_AT	648	62	13588	1.35285	1	0.994113	100
Annotation Cluster 117	Enrichment Score: 0.5420954245579839
Category	Term	Count	%	PValue	Genes	List Total	Pop Hits	Pop Total	Fold Enrichment	Bonferroni	Benjamini	FDR
KEGG_PATHWAY	mmu05014:Amyotrophic lateral sclerosis (ALS)	6	0.589391	0.154615	1455614_AT, 1426850_A_AT, 1449283_A_AT, 1421340_AT, 1437122_AT, 1416429_A_AT	288	57	5738	2.09722	1	0.591721	86.8419
BIOCARTA	m_keratinocytePathway:Keratinocyte Differentiation	5	0.491159	0.179374	1426850_A_AT, 1426725_S_AT, 1421340_AT, 1418982_AT, 1437122_AT	68	39	1171	2.20777	1	0.999011	89.0776
BIOCARTA	m_mapkPathway:MAPKinase Signaling Pathway	4	0.392927	0.852514	1426850_A_AT, 1449283_A_AT, 1421340_AT, 1418982_AT	68	80	1171	0.861029	1	1	100
Annotation Cluster 118	Enrichment Score: 0.5395982374077688
Category	Term	Count	%	PValue	Genes	List Total	Pop Hits	Pop Total	Fold Enrichment	Bonferroni	Benjamini	FDR
SP_PIR_KEYWORDS	lipid transport	6	0.589391	0.116946	1447520_AT, 1425391_A_AT, 1419974_AT, 1432466_A_AT, 1417900_A_AT, 1451601_A_AT	911	51	17854	2.30568	1	0.608976	82.9001
GOTERM_BP_FAT	GO:0010876~lipid localization	8	0.785855	0.409299	1417956_AT, 1447520_AT, 1425391_A_AT, 1415932_X_AT, 1419974_AT, 1432466_A_AT, 1417900_A_AT, 1451601_A_AT	648	128	13588	1.31057	1	0.975845	99.9905
GOTERM_BP_FAT	GO:0006869~lipid transport	7	0.687623	0.502549	1447520_AT, 1425391_A_AT, 1415932_X_AT, 1419974_AT, 1432466_A_AT, 1417900_A_AT, 1451601_A_AT	648	119	13588	1.23348	1	0.988707	99.9995
Annotation Cluster 119	Enrichment Score: 0.5364357502663238
Category	Term	Count	%	PValue	Genes	List Total	Pop Hits	Pop Total	Fold Enrichment	Bonferroni	Benjamini	FDR
GOTERM_MF_FAT	GO:0035091~phosphoinositide binding	7	0.687623	0.160921	1434140_AT, 1428822_A_AT, 1433449_AT, 1434361_AT, 1423135_AT, 1454667_AT, 1449002_AT	652	75	13288	1.90217	1	0.870652	93.2806
GOTERM_MF_FAT	GO:0005543~phospholipid binding	9	0.884086	0.228224	1434140_AT, 1420911_A_AT, 1428822_A_AT, 1433449_AT, 1434361_AT, 1416778_AT, 1423135_AT, 1454667_AT, 1449002_AT	652	119	13288	1.54137	1	0.933475	98.1444
SMART	SM00312:PX	4	0.392927	0.333882	1428822_A_AT, 1433449_AT, 1434361_AT, 1454667_AT	397	47	9131	1.95745	1	0.959004	99.4492
INTERPRO	IPR001683:Phox-like	4	0.392927	0.398608	1428822_A_AT, 1433449_AT, 1434361_AT, 1454667_AT	860	47	17763	1.75784	1	0.998833	99.9758
UP_SEQ_FEATURE	domain:PX	4	0.392927	0.425311	1428822_A_AT, 1433449_AT, 1434361_AT, 1454667_AT	905	42	16021	1.68598	1	1	99.9932
Annotation Cluster 120	Enrichment Score: 0.5287527119838157
Category	Term	Count	%	PValue	Genes	List Total	Pop Hits	Pop Total	Fold Enrichment	Bonferroni	Benjamini	FDR
GOTERM_BP_FAT	GO:0006916~anti-apoptosis	8	0.785855	0.125652	1427126_AT, 1452388_AT, 1419519_AT, 1418626_A_AT, 1437122_AT, 1420772_A_AT, 1422470_AT, 1422601_AT, 1449254_AT	648	88	13588	1.90629	1	0.800903	90.579
GOTERM_BP_FAT	GO:0010942~positive regulation of cell death	16	1.57171	0.222496	1421097_AT, 1424671_AT, 1432466_A_AT, 1423062_AT, 1422912_AT, 1449002_AT, 1416034_AT, 1417500_A_AT, 1417275_AT, 1423452_AT, 1416468_AT, 1416271_AT, 1460718_S_AT, 1416630_AT, 1422470_AT, 1418377_A_AT	648	252	13588	1.33137	1	0.898864	98.8054
GOTERM_BP_FAT	GO:0043066~negative regulation of apoptosis	15	1.47348	0.251017	1447863_S_AT, 1427126_AT, 1418626_A_AT, 1437122_AT, 1422601_AT, 1449254_AT, 1417956_AT, 1450852_S_AT, 1449534_AT, 1452388_AT, 1436739_AT, 1419519_AT, 1420772_A_AT, 1422470_AT, 1417193_AT, 1427048_AT	648	239	13588	1.31605	1	0.916532	99.381
GOTERM_BP_FAT	GO:0043069~negative regulation of programmed cell death	15	1.47348	0.27616	1447863_S_AT, 1427126_AT, 1418626_A_AT, 1437122_AT, 1422601_AT, 1449254_AT, 1417956_AT, 1450852_S_AT, 1449534_AT, 1452388_AT, 1436739_AT, 1419519_AT, 1420772_A_AT, 1422470_AT, 1417193_AT, 1427048_AT	648	244	13588	1.28909	1	0.933454	99.6605
GOTERM_BP_FAT	GO:0060548~negative regulation of cell death	15	1.47348	0.280589	1447863_S_AT, 1427126_AT, 1418626_A_AT, 1437122_AT, 1422601_AT, 1449254_AT, 1417956_AT, 1450852_S_AT, 1449534_AT, 1452388_AT, 1436739_AT, 1419519_AT, 1420772_A_AT, 1422470_AT, 1417193_AT, 1427048_AT	648	245	13588	1.28382	1	0.935589	99.6953
GOTERM_BP_FAT	GO:0010941~regulation of cell death	31	3.04519	0.287417	1427126_AT, 1421097_AT, 1432466_A_AT, 1449254_AT, 1449534_AT, 1436739_AT, 1417275_AT, 1416468_AT, 1416630_AT, 1422470_AT, 1417193_AT, 1418377_A_AT, 1447863_S_AT, 1424671_AT, 1418626_A_AT, 1423062_AT, 1437122_AT, 1422601_AT, 1422912_AT, 1460257_A_AT, 1449002_AT, 1450852_S_AT, 1416034_AT, 1417956_AT, 1417500_A_AT, 1452388_AT, 1419519_AT, 1423452_AT, 1416271_AT, 1460718_S_AT, 1420772_A_AT, 1427048_AT	648	563	13588	1.15461	1	0.936458	99.7423
GOTERM_BP_FAT	GO:0043065~positive regulation of apoptosis	15	1.47348	0.295006	1421097_AT, 1424671_AT, 1432466_A_AT, 1423062_AT, 1449002_AT, 1416034_AT, 1417500_A_AT, 1417275_AT, 1423452_AT, 1416468_AT, 1416271_AT, 1460718_S_AT, 1416630_AT, 1422470_AT, 1418377_A_AT	648	248	13588	1.26829	1	0.940094	99.7866
GOTERM_BP_FAT	GO:0043068~positive regulation of programmed cell death	15	1.47348	0.307375	1421097_AT, 1424671_AT, 1432466_A_AT, 1423062_AT, 1449002_AT, 1416034_AT, 1417500_A_AT, 1417275_AT, 1423452_AT, 1416468_AT, 1416271_AT, 1460718_S_AT, 1416630_AT, 1422470_AT, 1418377_A_AT	648	250	13588	1.25815	1	0.944982	99.8437
GOTERM_BP_FAT	GO:0042981~regulation of apoptosis	30	2.94695	0.321547	1427126_AT, 1421097_AT, 1432466_A_AT, 1449254_AT, 1449534_AT, 1436739_AT, 1417275_AT, 1416468_AT, 1416630_AT, 1422470_AT, 1417193_AT, 1418377_A_AT, 1447863_S_AT, 1424671_AT, 1418626_A_AT, 1423062_AT, 1437122_AT, 1422601_AT, 1460257_A_AT, 1449002_AT, 1450852_S_AT, 1416034_AT, 1417956_AT, 1417500_A_AT, 1452388_AT, 1419519_AT, 1423452_AT, 1416271_AT, 1460718_S_AT, 1420772_A_AT, 1427048_AT	648	553	13588	1.13757	1	0.950461	99.8913
GOTERM_BP_FAT	GO:0043067~regulation of programmed cell death	30	2.94695	0.334586	1427126_AT, 1421097_AT, 1432466_A_AT, 1449254_AT, 1449534_AT, 1436739_AT, 1417275_AT, 1416468_AT, 1416630_AT, 1422470_AT, 1417193_AT, 1418377_A_AT, 1447863_S_AT, 1424671_AT, 1418626_A_AT, 1423062_AT, 1437122_AT, 1422601_AT, 1460257_A_AT, 1449002_AT, 1450852_S_AT, 1416034_AT, 1417956_AT, 1417500_A_AT, 1452388_AT, 1419519_AT, 1423452_AT, 1416271_AT, 1460718_S_AT, 1420772_A_AT, 1427048_AT	648	560	13588	1.12335	1	0.955655	99.9228
GOTERM_BP_FAT	GO:0006917~induction of apoptosis	9	0.884086	0.544365	1416034_AT, 1417500_A_AT, 1423452_AT, 1417275_AT, 1416271_AT, 1424671_AT, 1432466_A_AT, 1422470_AT, 1449002_AT	648	167	13588	1.13007	1	0.992406	99.9999
GOTERM_BP_FAT	GO:0012502~induction of programmed cell death	9	0.884086	0.544365	1416034_AT, 1417500_A_AT, 1423452_AT, 1417275_AT, 1416271_AT, 1424671_AT, 1432466_A_AT, 1422470_AT, 1449002_AT	648	167	13588	1.13007	1	0.992406	99.9999
Annotation Cluster 121	Enrichment Score: 0.5269012634259692
Category	Term	Count	%	PValue	Genes	List Total	Pop Hits	Pop Total	Fold Enrichment	Bonferroni	Benjamini	FDR
INTERPRO	IPR007125:Histone core	6	0.589391	0.0507478	1418072_AT, 1424854_AT, 1418366_AT, 1452281_AT, 1422155_AT, 1427762_X_AT, 1455095_AT, 1422947_AT	860	42	17763	2.95066	1	0.807324	57.369
INTERPRO	IPR009072:Histone-fold	7	0.687623	0.0736391	1418072_AT, 1424854_AT, 1418366_AT, 1452281_AT, 1422155_AT, 1434960_AT, 1427762_X_AT, 1455095_AT, 1422947_AT	860	61	17763	2.37021	1	0.858219	71.4126
SMART	SM00427:H2B	3	0.294695	0.0929365	1418072_AT, 1427762_X_AT, 1455095_AT	397	12	9131	5.75	1	0.750921	71.315
PIR_SUPERFAMILY	PIRSF002050:histone H2B	3	0.294695	0.107051	1418072_AT, 1427762_X_AT, 1455095_AT	463	10	8136	5.27171	1	0.996713	80.4613
INTERPRO	IPR000558:Histone H2B	3	0.294695	0.111875	1418072_AT, 1427762_X_AT, 1455095_AT	860	12	17763	5.16366	1	0.93078	85.6618
GOTERM_BP_FAT	GO:0006334~nucleosome assembly	7	0.687623	0.133742	1418072_AT, 1416101_A_AT, 1424854_AT, 1418366_AT, 1424029_AT, 1422155_AT, 1427762_X_AT, 1455095_AT, 1422947_AT	648	73	13588	2.01074	1	0.81441	92.0004
KEGG_PATHWAY	mmu05322:Systemic lupus erythematosus	9	0.884086	0.142485	1418072_AT, 1416336_S_AT, 1419260_A_AT, 1435290_X_AT, 1424854_AT, 1418366_AT, 1422155_AT, 1427762_X_AT, 1417025_AT, 1455095_AT, 1422947_AT	288	103	5738	1.7409	1	0.571768	84.372
GOTERM_BP_FAT	GO:0031497~chromatin assembly	7	0.687623	0.146563	1418072_AT, 1416101_A_AT, 1424854_AT, 1418366_AT, 1424029_AT, 1422155_AT, 1427762_X_AT, 1455095_AT, 1422947_AT	648	75	13588	1.95712	1	0.828941	93.8461
GOTERM_BP_FAT	GO:0006333~chromatin assembly or disassembly	9	0.884086	0.148116	1418072_AT, 1416101_A_AT, 1424854_AT, 1418366_AT, 1448645_AT, 1424029_AT, 1422155_AT, 1437745_AT, 1427762_X_AT, 1455095_AT, 1422947_AT	648	109	13588	1.7314	1	0.828283	94.0402
GOTERM_BP_FAT	GO:0065004~protein-DNA complex assembly	7	0.687623	0.153175	1418072_AT, 1416101_A_AT, 1424854_AT, 1418366_AT, 1424029_AT, 1422155_AT, 1427762_X_AT, 1455095_AT, 1422947_AT	648	76	13588	1.93137	1	0.837841	94.6331
GOTERM_BP_FAT	GO:0034728~nucleosome organization	7	0.687623	0.153175	1418072_AT, 1416101_A_AT, 1424854_AT, 1418366_AT, 1424029_AT, 1422155_AT, 1427762_X_AT, 1455095_AT, 1422947_AT	648	76	13588	1.93137	1	0.837841	94.6331
SP_PIR_KEYWORDS	nucleosome core	5	0.491159	0.184834	1418072_AT, 1424854_AT, 1418366_AT, 1422155_AT, 1427762_X_AT, 1455095_AT, 1422947_AT	911	44	17854	2.22707	1	0.738597	94.5089
GOTERM_CC_FAT	GO:0032993~protein-DNA complex	7	0.687623	0.222608	1418072_AT, 1416101_A_AT, 1424854_AT, 1418366_AT, 1422155_AT, 1427762_X_AT, 1455095_AT, 1437914_AT, 1422947_AT	681	75	12504	1.71372	1	0.791001	96.9086
GOTERM_CC_FAT	GO:0000786~nucleosome	6	0.589391	0.246908	1418072_AT, 1416101_A_AT, 1424854_AT, 1418366_AT, 1422155_AT, 1427762_X_AT, 1455095_AT, 1422947_AT	681	62	12504	1.77689	1	0.818406	98.0059
SP_PIR_KEYWORDS	isopeptide bond	17	1.66994	0.337001	1416526_A_AT, 1418072_AT, 1427096_S_AT, 1424854_AT, 1418366_AT, 1426725_S_AT, 1418288_AT, 1424562_A_AT, 1427762_X_AT, 1455095_AT, 1421027_A_AT, 1422947_AT, 1426018_A_AT, 1416101_A_AT, 1420583_A_AT, 1416967_AT, 1422155_AT, 1423389_AT, 1415996_AT	911	277	17854	1.20278	1	0.864919	99.708
GOTERM_BP_FAT	GO:0006323~DNA packaging	7	0.687623	0.349576	1418072_AT, 1416101_A_AT, 1424854_AT, 1418366_AT, 1424029_AT, 1422155_AT, 1427762_X_AT, 1455095_AT, 1422947_AT	648	101	13588	1.45331	1	0.960807	99.9483
GOTERM_BP_FAT	GO:0034622~cellular macromolecular complex assembly	11	1.08055	0.588137	1418072_AT, 1418366_AT, 1424826_S_AT, 1424854_AT, 1415812_AT, 1424029_AT, 1427762_X_AT, 1455095_AT, 1418551_AT, 1422947_AT, 1416101_A_AT, 1422155_AT, 1438936_S_AT	648	217	13588	1.06295	1	0.994968	100
GOTERM_BP_FAT	GO:0065003~macromolecular complex assembly	16	1.57171	0.648313	1418072_AT, 1424854_AT, 1418713_AT, 1418366_AT, 1424826_S_AT, 1415812_AT, 1424029_AT, 1449106_AT, 1427762_X_AT, 1455095_AT, 1422947_AT, 1418551_AT, 1417500_A_AT, 1416101_A_AT, 1418509_AT, 1422155_AT, 1434960_AT, 1438936_S_AT	648	338	13588	0.992622	1	0.99723	100
GOTERM_BP_FAT	GO:0043933~macromolecular complex subunit organization	17	1.66994	0.678384	1418072_AT, 1424854_AT, 1418713_AT, 1418366_AT, 1424826_S_AT, 1415812_AT, 1432466_A_AT, 1424029_AT, 1449106_AT, 1427762_X_AT, 1455095_AT, 1422947_AT, 1418551_AT, 1417500_A_AT, 1416101_A_AT, 1418509_AT, 1422155_AT, 1434960_AT, 1438936_S_AT	648	367	13588	0.971322	1	0.997839	100
GOTERM_CC_FAT	GO:0000785~chromatin	9	0.884086	0.681002	1418072_AT, 1416101_A_AT, 1424854_AT, 1418366_AT, 1448645_AT, 1422155_AT, 1437745_AT, 1427762_X_AT, 1455095_AT, 1417728_AT, 1422947_AT	681	165	12504	1.00152	1	0.984674	100
SP_PIR_KEYWORDS	chromosomal protein	7	0.687623	0.698038	1418072_AT, 1416101_A_AT, 1424854_AT, 1418366_AT, 1416553_AT, 1422155_AT, 1427762_X_AT, 1455095_AT, 1422947_AT	911	136	17854	1.00873	1	0.982013	100
GOTERM_BP_FAT	GO:0051276~chromosome organization	18	1.76817	0.735423	1427126_AT, 1418072_AT, 1428662_A_AT, 1424854_AT, 1418366_AT, 1418467_AT, 1424029_AT, 1427762_X_AT, 1455095_AT, 1422947_AT, 1449534_AT, 1417960_AT, 1416101_A_AT, 1452388_AT, 1448645_AT, 1434071_A_AT, 1422155_AT, 1437745_AT, 1422470_AT, 1417728_AT, 1429270_A_AT	648	404	13588	0.934268	1	0.998965	100
GOTERM_BP_FAT	GO:0034621~cellular macromolecular complex subunit organization	11	1.08055	0.735646	1418072_AT, 1418366_AT, 1424826_S_AT, 1424854_AT, 1415812_AT, 1424029_AT, 1427762_X_AT, 1455095_AT, 1418551_AT, 1422947_AT, 1416101_A_AT, 1422155_AT, 1438936_S_AT	648	245	13588	0.941471	1	0.998955	100
GOTERM_BP_FAT	GO:0006325~chromatin organization	13	1.27701	0.824701	1418072_AT, 1428662_A_AT, 1418366_AT, 1418467_AT, 1424854_AT, 1424029_AT, 1427762_X_AT, 1455095_AT, 1422947_AT, 1416101_A_AT, 1448645_AT, 1422155_AT, 1437745_AT, 1422470_AT, 1417728_AT	648	315	13588	0.865393	1	0.999763	100
GOTERM_CC_FAT	GO:0044427~chromosomal part	15	1.47348	0.828492	1418072_AT, 1418366_AT, 1424854_AT, 1416553_AT, 1427762_X_AT, 1455095_AT, 1422947_AT, 1449534_AT, 1431087_AT, 1416101_A_AT, 1428293_AT, 1448645_AT, 1422155_AT, 1437745_AT, 1417728_AT, 1429270_A_AT, 1437914_AT	681	318	12504	0.866096	1	0.997603	100
UP_SEQ_FEATURE	cross-link:Glycyl lysine isopeptide (Lys-Gly) (interchain with G-Cter in ubiquitin)	8	0.785855	0.842592	1418072_AT, 1416101_A_AT, 1427096_S_AT, 1418366_AT, 1422155_AT, 1424562_A_AT, 1415996_AT, 1427762_X_AT, 1455095_AT	905	168	16021	0.842989	1	1	100
GOTERM_CC_FAT	GO:0005694~chromosome	15	1.47348	0.954543	1418072_AT, 1418366_AT, 1424854_AT, 1416553_AT, 1427762_X_AT, 1455095_AT, 1422947_AT, 1449534_AT, 1431087_AT, 1416101_A_AT, 1428293_AT, 1448645_AT, 1422155_AT, 1437745_AT, 1417728_AT, 1429270_A_AT, 1437914_AT	681	378	12504	0.72862	1	0.999869	100
SP_PIR_KEYWORDS	DNA binding	5	0.491159	0.99929	1422528_A_AT, 1416101_A_AT, 1424854_AT, 1420583_A_AT, 1418366_AT, 1422155_AT, 1422947_AT	911	258	17854	0.379811	1	1	100
Annotation Cluster 122	Enrichment Score: 0.5193884371528406
Category	Term	Count	%	PValue	Genes	List Total	Pop Hits	Pop Total	Fold Enrichment	Bonferroni	Benjamini	FDR
SP_PIR_KEYWORDS	pyridoxal phosphate	6	0.589391	0.189996	1429352_AT, 1417741_AT, 1423828_AT, 1427981_A_AT, 1434542_AT, 1448602_AT	911	60	17854	1.95982	1	0.74427	94.9826
GOTERM_MF_FAT	GO:0070279~vitamin B6 binding	5	0.491159	0.27173	1429352_AT, 1417741_AT, 1427981_A_AT, 1434542_AT, 1448602_AT	652	54	13288	1.88707	1	0.952356	99.2402
GOTERM_MF_FAT	GO:0030170~pyridoxal phosphate binding	5	0.491159	0.27173	1429352_AT, 1417741_AT, 1427981_A_AT, 1434542_AT, 1448602_AT	652	54	13288	1.88707	1	0.952356	99.2402
INTERPRO	IPR015421:Pyridoxal phosphate-dependent transferase, major region, subdomain 1	3	0.294695	0.596248	1429352_AT, 1427981_A_AT, 1434542_AT	860	41	17763	1.51132	1	0.99994	100
Annotation Cluster 123	Enrichment Score: 0.5158087920906792
Category	Term	Count	%	PValue	Genes	List Total	Pop Hits	Pop Total	Fold Enrichment	Bonferroni	Benjamini	FDR
GOTERM_BP_FAT	GO:0031128~developmental induction	3	0.294695	0.264126	1423136_AT, 1416967_AT, 1422912_AT	648	21	13588	2.99559	1	0.924936	99.5463
GOTERM_BP_FAT	GO:0045168~cell-cell signaling involved in cell fate specification	3	0.294695	0.264126	1423136_AT, 1416967_AT, 1422912_AT	648	21	13588	2.99559	1	0.924936	99.5463
GOTERM_BP_FAT	GO:0001708~cell fate specification	5	0.491159	0.308922	1448394_AT, 1423136_AT, 1416967_AT, 1422912_AT, 1427048_AT	648	59	13588	1.77705	1	0.945434	99.8497
GOTERM_BP_FAT	GO:0045165~cell fate commitment	9	0.884086	0.401137	1426018_A_AT, 1448394_AT, 1423136_AT, 1416967_AT, 1418136_AT, 1437122_AT, 1422912_AT, 1421027_A_AT, 1427048_AT	648	147	13588	1.28382	1	0.974216	99.9879
Annotation Cluster 124	Enrichment Score: 0.49986459709290787
Category	Term	Count	%	PValue	Genes	List Total	Pop Hits	Pop Total	Fold Enrichment	Bonferroni	Benjamini	FDR
INTERPRO	IPR014352:FERM/acyl-CoA-binding protein, 3-helical bundle	6	0.589391	0.055238	1449626_S_AT, 1434180_AT, 1424092_AT, 1431012_A_AT, 1455450_AT, 1421814_AT	860	43	17763	2.88204	1	0.806104	60.5529
INTERPRO	IPR000798:Ezrin/radixin/moesin ERM	3	0.294695	0.233556	1424092_AT, 1455450_AT, 1421814_AT	860	19	17763	3.26126	1	0.987234	98.7151
INTERPRO	IPR018980:FERM, C-terminal PH-like domain	3	0.294695	0.306434	1424092_AT, 1455450_AT, 1421814_AT	860	23	17763	2.69408	1	0.99548	99.7497
INTERPRO	IPR019750:Band 4.1 subgroup	3	0.294695	0.324522	1424092_AT, 1455450_AT, 1421814_AT	860	24	17763	2.58183	1	0.996738	99.8376
SMART	SM00295:B41	4	0.392927	0.357908	1434180_AT, 1424092_AT, 1455450_AT, 1421814_AT	397	49	9131	1.87755	1	0.961549	99.6558
INTERPRO	IPR019748:FERM central domain	4	0.392927	0.372066	1434180_AT, 1424092_AT, 1455450_AT, 1421814_AT	860	45	17763	1.83597	1	0.998699	99.9508
INTERPRO	IPR018979:FERM, N-terminal	3	0.294695	0.377917	1424092_AT, 1455450_AT, 1421814_AT	860	27	17763	2.29496	1	0.998593	99.9578
INTERPRO	IPR019747:FERM conserved site	4	0.392927	0.385371	1434180_AT, 1424092_AT, 1455450_AT, 1421814_AT	860	46	17763	1.79606	1	0.998724	99.9654
INTERPRO	IPR019749:Band 4.1 domain	4	0.392927	0.424832	1434180_AT, 1424092_AT, 1455450_AT, 1421814_AT	860	49	17763	1.68609	1	0.999084	99.9883
UP_SEQ_FEATURE	domain:FERM	4	0.392927	0.455503	1434180_AT, 1424092_AT, 1455450_AT, 1421814_AT	905	44	16021	1.60934	1	1	99.9973
INTERPRO	IPR000299:FERM domain	3	0.294695	0.659029	1424092_AT, 1455450_AT, 1421814_AT	860	46	17763	1.34704	1	0.99998	100
Annotation Cluster 125	Enrichment Score: 0.4897056528375086
Category	Term	Count	%	PValue	Genes	List Total	Pop Hits	Pop Total	Fold Enrichment	Bonferroni	Benjamini	FDR
GOTERM_BP_FAT	GO:0045927~positive regulation of growth	6	0.589391	0.126893	1428662_A_AT, 1416330_AT, 1419499_AT, 1437122_AT, 1437745_AT, 1418571_AT	648	56	13588	2.24669	1	0.801135	90.8116
GOTERM_BP_FAT	GO:0030307~positive regulation of cell growth	3	0.294695	0.175318	1416330_AT, 1437122_AT, 1418571_AT	648	16	13588	3.93171	1	0.849905	96.6327
GOTERM_BP_FAT	GO:0045793~positive regulation of cell size	3	0.294695	0.228256	1416330_AT, 1437122_AT, 1418571_AT	648	19	13588	3.31092	1	0.903819	98.9519
GOTERM_BP_FAT	GO:0032535~regulation of cellular component size	7	0.687623	0.784562	1455213_AT, 1416330_AT, 1415923_AT, 1433742_AT, 1415812_AT, 1437122_AT, 1418571_AT	648	161	13588	0.911702	1	0.999514	100
GOTERM_BP_FAT	GO:0008361~regulation of cell size	4	0.392927	0.893625	1416330_AT, 1415923_AT, 1437122_AT, 1418571_AT	648	108	13588	0.776635	1	0.999951	100
Annotation Cluster 126	Enrichment Score: 0.48102249557446664
Category	Term	Count	%	PValue	Genes	List Total	Pop Hits	Pop Total	Fold Enrichment	Bonferroni	Benjamini	FDR
GOTERM_BP_FAT	GO:0046164~alcohol catabolic process	7	0.687623	0.0882932	1423780_AT, 1416204_AT, 1416183_A_AT, 1416225_AT, 1424714_AT, 1417951_AT, 1418701_AT	648	65	13588	2.25821	1	0.732592	80.332
GOTERM_BP_FAT	GO:0044275~cellular carbohydrate catabolic process	6	0.589391	0.156348	1423780_AT, 1416204_AT, 1416183_A_AT, 1424714_AT, 1417951_AT, 1448602_AT	648	60	13588	2.09691	1	0.840477	94.9761
KEGG_PATHWAY	mmu00010:Glycolysis / Gluconeogenesis	6	0.589391	0.252364	1422478_A_AT, 1416183_A_AT, 1416225_AT, 1424714_AT, 1417951_AT, 1416617_AT	288	68	5738	1.75797	1	0.735403	97.0158
GOTERM_BP_FAT	GO:0016052~carbohydrate catabolic process	6	0.589391	0.342379	1423780_AT, 1416204_AT, 1416183_A_AT, 1424714_AT, 1417951_AT, 1448602_AT	648	81	13588	1.55327	1	0.957835	99.9372
GOTERM_BP_FAT	GO:0006007~glucose catabolic process	4	0.392927	0.453218	1423780_AT, 1416183_A_AT, 1424714_AT, 1417951_AT	648	52	13588	1.61301	1	0.98329	99.9976
GOTERM_BP_FAT	GO:0019320~hexose catabolic process	4	0.392927	0.453218	1423780_AT, 1416183_A_AT, 1424714_AT, 1417951_AT	648	52	13588	1.61301	1	0.98329	99.9976
GOTERM_BP_FAT	GO:0046365~monosaccharide catabolic process	4	0.392927	0.478114	1423780_AT, 1416183_A_AT, 1424714_AT, 1417951_AT	648	54	13588	1.55327	1	0.986591	99.9989
GOTERM_BP_FAT	GO:0006096~glycolysis	3	0.294695	0.626451	1416183_A_AT, 1424714_AT, 1417951_AT	648	44	13588	1.42971	1	0.996587	100
SP_PIR_KEYWORDS	glycolysis	3	0.294695	0.638574	1416183_A_AT, 1424714_AT, 1417951_AT	911	42	17854	1.39987	1	0.974981	99.9999
Annotation Cluster 127	Enrichment Score: 0.4714587959046815
Category	Term	Count	%	PValue	Genes	List Total	Pop Hits	Pop Total	Fold Enrichment	Bonferroni	Benjamini	FDR
GOTERM_BP_FAT	GO:0048871~multicellular organismal homeostasis	6	0.589391	0.249035	1450852_S_AT, 1417956_AT, 1422645_AT, 1417092_AT, 1437122_AT, 1435436_AT	648	71	13588	1.77204	1	0.916093	99.3516
GOTERM_BP_FAT	GO:0060249~anatomical structure homeostasis	6	0.589391	0.361474	1450852_S_AT, 1427126_AT, 1417307_AT, 1452388_AT, 1417092_AT, 1437122_AT, 1435436_AT	648	83	13588	1.51584	1	0.964098	99.9626
GOTERM_BP_FAT	GO:0001894~tissue homeostasis	4	0.392927	0.427844	1450852_S_AT, 1417092_AT, 1437122_AT, 1435436_AT	648	50	13588	1.67753	1	0.978919	99.9946
Annotation Cluster 128	Enrichment Score: 0.45733957388650104
Category	Term	Count	%	PValue	Genes	List Total	Pop Hits	Pop Total	Fold Enrichment	Bonferroni	Benjamini	FDR
GOTERM_BP_FAT	GO:0007130~synaptonemal complex assembly	3	0.294695	0.065253	1449534_AT, 1417960_AT, 1429270_A_AT	648	9	13588	6.98971	1	0.666351	69.49
GOTERM_BP_FAT	GO:0070193~synaptonemal complex organization	3	0.294695	0.0790589	1449534_AT, 1417960_AT, 1429270_A_AT	648	10	13588	6.29074	1	0.701976	76.5169
GOTERM_BP_FAT	GO:0007129~synapsis	3	0.294695	0.192775	1449534_AT, 1417960_AT, 1429270_A_AT	648	17	13588	3.70044	1	0.869084	97.6889
GOTERM_BP_FAT	GO:0070192~chromosome organization involved in meiosis	3	0.294695	0.192775	1449534_AT, 1417960_AT, 1429270_A_AT	648	17	13588	3.70044	1	0.869084	97.6889
GOTERM_BP_FAT	GO:0007127~meiosis I	3	0.294695	0.50167	1449534_AT, 1417960_AT, 1429270_A_AT	648	35	13588	1.79735	1	0.988845	99.9995
GOTERM_BP_FAT	GO:0007126~meiosis	3	0.294695	0.92687	1449534_AT, 1417960_AT, 1429270_A_AT	648	88	13588	0.714857	1	0.999987	100
GOTERM_BP_FAT	GO:0051327~M phase of meiotic cell cycle	3	0.294695	0.92687	1449534_AT, 1417960_AT, 1429270_A_AT	648	88	13588	0.714857	1	0.999987	100
GOTERM_BP_FAT	GO:0051321~meiotic cell cycle	3	0.294695	0.932475	1449534_AT, 1417960_AT, 1429270_A_AT	648	90	13588	0.698971	1	0.99999	100
GOTERM_BP_FAT	GO:0000279~M phase	7	0.687623	0.993573	1449534_AT, 1431087_AT, 1417960_AT, 1425745_A_AT, 1428293_AT, 1420827_A_AT, 1429270_A_AT	648	283	13588	0.518671	1	1	100
Annotation Cluster 129	Enrichment Score: 0.45665409362261233
Category	Term	Count	%	PValue	Genes	List Total	Pop Hits	Pop Total	Fold Enrichment	Bonferroni	Benjamini	FDR
SP_PIR_KEYWORDS	mhc ii	3	0.294695	0.105222	1435290_X_AT, 1449130_AT, 1417025_AT	911	11	17854	5.34498	1	0.580358	79.3778
UP_SEQ_FEATURE	region of interest:Alpha-2	3	0.294695	0.124828	1422645_AT, 1435290_X_AT, 1416978_AT	905	11	16021	4.82803	1	0.9982	90.0707
UP_SEQ_FEATURE	region of interest:Alpha-1	3	0.294695	0.124828	1422645_AT, 1435290_X_AT, 1416978_AT	905	11	16021	4.82803	1	0.9982	90.0707
UP_SEQ_FEATURE	region of interest:Connecting peptide	4	0.392927	0.208085	1422645_AT, 1435290_X_AT, 1416978_AT, 1417025_AT	905	28	16021	2.52897	1	0.999862	98.2426
SMART	SM00407:IGc1	6	0.589391	0.291338	1422645_AT, 1435290_X_AT, 1449130_AT, 1416978_AT, 1427329_A_AT, 1417025_AT	397	83	9131	1.66265	1	0.945419	98.7831
GOTERM_CC_FAT	GO:0042611~MHC protein complex	5	0.491159	0.313017	1422645_AT, 1435290_X_AT, 1449130_AT, 1416978_AT, 1417025_AT	681	52	12504	1.7655	1	0.860879	99.4391
INTERPRO	IPR003597:Immunoglobulin C1-set	6	0.589391	0.373869	1422645_AT, 1435290_X_AT, 1449130_AT, 1416978_AT, 1427329_A_AT, 1417025_AT	860	83	17763	1.49311	1	0.998659	99.9531
GOTERM_BP_FAT	GO:0019884~antigen processing and presentation of exogenous antigen	3	0.294695	0.387846	1435290_X_AT, 1449130_AT, 1417025_AT	648	28	13588	2.24669	1	0.971673	99.9822
GOTERM_BP_FAT	GO:0019882~antigen processing and presentation	6	0.589391	0.399699	1422645_AT, 1435290_X_AT, 1449130_AT, 1416978_AT, 1427329_A_AT, 1417025_AT	648	87	13588	1.44615	1	0.97405	99.9874
UP_SEQ_FEATURE	domain:Ig-like C1-type	3	0.294695	0.41602	1422645_AT, 1435290_X_AT, 1417025_AT	905	25	16021	2.12433	1	1	99.991
GOTERM_BP_FAT	GO:0048002~antigen processing and presentation of peptide antigen	3	0.294695	0.50167	1422645_AT, 1435290_X_AT, 1417025_AT	648	35	13588	1.79735	1	0.988845	99.9995
INTERPRO	IPR003006:Immunoglobulin/major histocompatibility complex, conserved site	6	0.589391	0.516346	1453638_AT, 1422645_AT, 1435290_X_AT, 1416978_AT, 1427329_A_AT, 1417025_AT	860	98	17763	1.26457	1	0.999737	99.9993
INTERPRO	IPR001039:MHC class I, alpha chain, alpha1 and alpha2	3	0.294695	0.596248	1422645_AT, 1449130_AT, 1416978_AT	860	41	17763	1.51132	1	0.99994	100
GOTERM_CC_FAT	GO:0042612~MHC class I protein complex	3	0.294695	0.674285	1422645_AT, 1449130_AT, 1416978_AT	681	42	12504	1.31152	1	0.984119	100
INTERPRO	IPR011161:MHC class I-like antigen recognition	3	0.294695	0.692795	1422645_AT, 1449130_AT, 1416978_AT	860	49	17763	1.26457	1	0.999992	100
SP_PIR_KEYWORDS	immune response	7	0.687623	0.912303	1422645_AT, 1435290_X_AT, 1416625_AT, 1449130_AT, 1423153_X_AT, 1416335_AT, 1417025_AT	911	184	17854	0.745585	1	0.998939	100
Annotation Cluster 130	Enrichment Score: 0.45288441613454833
Category	Term	Count	%	PValue	Genes	List Total	Pop Hits	Pop Total	Fold Enrichment	Bonferroni	Benjamini	FDR
GOTERM_CC_FAT	GO:0005741~mitochondrial outer membrane	7	0.687623	0.268263	1455614_AT, 1434354_AT, 1416849_AT, 1419499_AT, 1437122_AT, 1422470_AT, 1424562_A_AT	681	80	12504	1.60661	1	0.838026	98.6595
GOTERM_CC_FAT	GO:0031968~organelle outer membrane	7	0.687623	0.335428	1455614_AT, 1434354_AT, 1416849_AT, 1419499_AT, 1437122_AT, 1422470_AT, 1424562_A_AT	681	87	12504	1.47734	1	0.872498	99.6452
GOTERM_CC_FAT	GO:0019867~outer membrane	7	0.687623	0.364847	1455614_AT, 1434354_AT, 1416849_AT, 1419499_AT, 1437122_AT, 1422470_AT, 1424562_A_AT	681	90	12504	1.4281	1	0.892217	99.8101
SP_PIR_KEYWORDS	mitochondrion outer membrane	5	0.491159	0.470102	1455614_AT, 1434354_AT, 1416849_AT, 1419499_AT, 1437122_AT	911	69	17854	1.42016	1	0.930315	99.9879
Annotation Cluster 131	Enrichment Score: 0.4528683896104685
Category	Term	Count	%	PValue	Genes	List Total	Pop Hits	Pop Total	Fold Enrichment	Bonferroni	Benjamini	FDR
COG_ONTOLOGY	Defense mechanisms	4	0.392927	0.0537428	1440879_AT, 1435751_AT, 1443870_AT, 1427371_AT	95	19	2040	4.52078	0.668729	0.424438	34.3238
KEGG_PATHWAY	mmu02010:ABC transporters	5	0.491159	0.186137	1416679_AT, 1440879_AT, 1435751_AT, 1443870_AT, 1427371_AT	288	45	5738	2.21373	1	0.642927	91.6839
INTERPRO	IPR003439:ABC transporter-like	5	0.491159	0.253394	1416679_AT, 1440879_AT, 1435751_AT, 1443870_AT, 1427371_AT	860	53	17763	1.94855	1	0.990145	99.1636
INTERPRO	IPR017871:ABC transporter, conserved site	5	0.491159	0.374543	1416679_AT, 1440879_AT, 1435751_AT, 1443870_AT, 1427371_AT	860	64	17763	1.61364	1	0.998584	99.9539
SMART	SM00382:AAA	8	0.785855	0.391113	1424829_AT, 1451541_AT, 1416679_AT, 1440879_AT, 1416214_AT, 1435751_AT, 1443870_AT, 1427371_AT	397	138	9131	1.33333	1	0.964097	99.8256
UP_SEQ_FEATURE	domain:ABC transporter 1	3	0.294695	0.474191	1440879_AT, 1435751_AT, 1427371_AT	905	28	16021	1.89672	1	1	99.9985
UP_SEQ_FEATURE	domain:ABC transporter 2	3	0.294695	0.474191	1440879_AT, 1435751_AT, 1427371_AT	905	28	16021	1.89672	1	1	99.9985
INTERPRO	IPR003593:ATPase, AAA+ type, core	8	0.785855	0.503581	1424829_AT, 1451541_AT, 1416679_AT, 1440879_AT, 1416214_AT, 1435751_AT, 1443870_AT, 1427371_AT	860	138	17763	1.19737	1	0.999693	99.999
UP_SEQ_FEATURE	nucleotide phosphate-binding region:ATP 1	3	0.294695	0.528712	1440879_AT, 1435751_AT, 1427371_AT	905	31	16021	1.71317	1	1	99.9998
UP_SEQ_FEATURE	nucleotide phosphate-binding region:ATP 2	3	0.294695	0.528712	1440879_AT, 1435751_AT, 1427371_AT	905	31	16021	1.71317	1	1	99.9998
GOTERM_MF_FAT	GO:0016887~ATPase activity	11	1.08055	0.887726	1422009_AT, 1416679_AT, 1415932_X_AT, 1418453_A_AT, 1427465_AT, 1440879_AT, 1437745_AT, 1435751_AT, 1443870_AT, 1427371_AT, 1416567_S_AT	652	281	13288	0.797808	1	0.999989	100
Annotation Cluster 132	Enrichment Score: 0.4506983992167013
Category	Term	Count	%	PValue	Genes	List Total	Pop Hits	Pop Total	Fold Enrichment	Bonferroni	Benjamini	FDR
GOTERM_BP_FAT	GO:0010604~positive regulation of macromolecule metabolic process	40	3.92927	0.0591093	1438236_AT, 1416330_AT, 1423136_AT, 1418467_AT, 1449130_AT, 1418982_AT, 1416293_AT, 1416778_AT, 1419081_AT, 1423493_A_AT, 1426018_A_AT, 1421643_AT, 1417962_S_AT, 1419155_A_AT, 1420583_A_AT, 1426690_A_AT, 1453103_AT, 1435828_AT, 1442376_AT, 1427040_AT, 1447863_S_AT, 1418713_AT, 1426725_S_AT, 1416647_AT, 1417817_A_AT, 1437122_AT, 1435436_AT, 1448181_AT, 1421162_A_AT, 1422912_AT, 1421027_A_AT, 14160…	648	633	13588	1.32506	1	0.651585	65.7632
GOTERM_BP_FAT	GO:0006357~regulation of transcription from RNA polymerase II promoter	39	3.83104	0.0619631	1424596_S_AT, 1428662_A_AT, 1438236_AT, 1418982_AT, 1443260_AT, 1416293_AT, 1416778_AT, 1423493_A_AT, 1421528_A_AT, 1426018_A_AT, 1421643_AT, 1420619_A_AT, 1419155_A_AT, 1417649_AT, 1420583_A_AT, 1426690_A_AT, 1453103_AT, 1416826_A_AT, 1425895_A_AT, 1420858_AT, 1416630_AT, 1417193_AT, 1435828_AT, 1417728_AT, 1442376_AT, 1437914_AT, 1447863_S_AT, 1426725_S_AT, 1417817_A_AT, 1435436_AT, 1421162_A_A…	648	616	13588	1.32759	1	0.661715	67.5447
GOTERM_BP_FAT	GO:0045944~positive regulation of transcription from RNA polymerase II promoter	24	2.35756	0.0896752	1438236_AT, 1418982_AT, 1416293_AT, 1416778_AT, 1423493_A_AT, 1426018_A_AT, 1421643_AT, 1419155_A_AT, 1420583_A_AT, 1453103_AT, 1426690_A_AT, 1435828_AT, 1442376_AT, 1447863_S_AT, 1426725_S_AT, 1417817_A_AT, 1435436_AT, 1422912_AT, 1421027_A_AT, 1421162_A_AT, 1449945_AT, 1425806_A_AT, 1416967_AT, 1419519_AT, 1426208_X_AT, 1427048_AT	648	358	13588	1.40575	1	0.736271	80.8499
GOTERM_BP_FAT	GO:0045893~positive regulation of transcription, DNA-dependent	27	2.65226	0.0952731	1438236_AT, 1418982_AT, 1416293_AT, 1416778_AT, 1423493_A_AT, 1426018_A_AT, 1421643_AT, 1419155_A_AT, 1420583_A_AT, 1426690_A_AT, 1453103_AT, 1435828_AT, 1442376_AT, 1427040_AT, 1447863_S_AT, 1416647_AT, 1426725_S_AT, 1417817_A_AT, 1435436_AT, 1448181_AT, 1421162_A_AT, 1421027_A_AT, 1422912_AT, 1449945_AT, 1419519_AT, 1416967_AT, 1425806_A_AT, 1426208_X_AT, 1427048_AT	648	416	13588	1.36098	1	0.744567	82.8192
GOTERM_BP_FAT	GO:0051254~positive regulation of RNA metabolic process	27	2.65226	0.101654	1438236_AT, 1418982_AT, 1416293_AT, 1416778_AT, 1423493_A_AT, 1426018_A_AT, 1421643_AT, 1419155_A_AT, 1420583_A_AT, 1426690_A_AT, 1453103_AT, 1435828_AT, 1442376_AT, 1427040_AT, 1447863_S_AT, 1416647_AT, 1426725_S_AT, 1417817_A_AT, 1435436_AT, 1448181_AT, 1421162_A_AT, 1421027_A_AT, 1422912_AT, 1449945_AT, 1419519_AT, 1416967_AT, 1425806_A_AT, 1426208_X_AT, 1427048_AT	648	419	13588	1.35123	1	0.762404	84.8306
GOTERM_BP_FAT	GO:0045941~positive regulation of transcription	30	2.94695	0.101899	1438236_AT, 1418467_AT, 1418982_AT, 1416293_AT, 1416778_AT, 1423493_A_AT, 1426018_A_AT, 1421643_AT, 1419155_A_AT, 1420583_A_AT, 1426690_A_AT, 1453103_AT, 1435828_AT, 1442376_AT, 1427040_AT, 1447863_S_AT, 1418713_AT, 1416647_AT, 1426725_S_AT, 1417817_A_AT, 1435436_AT, 1448181_AT, 1421162_A_AT, 1421027_A_AT, 1422912_AT, 1449945_AT, 1419519_AT, 1416967_AT, 1425806_A_AT, 1416301_A_AT, 1426208_X_AT, 1…	648	475	13588	1.32437	1	0.761401	84.9033
GOTERM_BP_FAT	GO:0010628~positive regulation of gene expression	30	2.94695	0.12902	1438236_AT, 1418467_AT, 1418982_AT, 1416293_AT, 1416778_AT, 1423493_A_AT, 1426018_A_AT, 1421643_AT, 1419155_A_AT, 1420583_A_AT, 1426690_A_AT, 1453103_AT, 1435828_AT, 1442376_AT, 1427040_AT, 1447863_S_AT, 1418713_AT, 1416647_AT, 1426725_S_AT, 1417817_A_AT, 1435436_AT, 1448181_AT, 1421162_A_AT, 1421027_A_AT, 1422912_AT, 1449945_AT, 1419519_AT, 1416967_AT, 1425806_A_AT, 1416301_A_AT, 1426208_X_AT, 1…	648	488	13588	1.28909	1	0.805277	91.1975
GOTERM_BP_FAT	GO:0051173~positive regulation of nitrogen compound metabolic process	31	3.04519	0.175007	1438236_AT, 1418467_AT, 1418982_AT, 1416293_AT, 1416778_AT, 1423493_A_AT, 1426018_A_AT, 1421643_AT, 1419155_A_AT, 1420583_A_AT, 1426690_A_AT, 1453103_AT, 1417193_AT, 1435828_AT, 1442376_AT, 1427040_AT, 1447863_S_AT, 1418713_AT, 1416647_AT, 1426725_S_AT, 1417817_A_AT, 1435436_AT, 1448181_AT, 1421162_A_AT, 1421027_A_AT, 1422912_AT, 1449945_AT, 1419519_AT, 1416967_AT, 1425806_A_AT, 1416301_A_AT, 142…	648	526	13588	1.23582	1	0.850497	96.6103
GOTERM_BP_FAT	GO:0045935~positive regulation of nucleobase, nucleoside, nucleotide and nucleic acid metabolic process	30	2.94695	0.184206	1438236_AT, 1418467_AT, 1418982_AT, 1416293_AT, 1416778_AT, 1423493_A_AT, 1426018_A_AT, 1421643_AT, 1419155_A_AT, 1420583_A_AT, 1426690_A_AT, 1453103_AT, 1435828_AT, 1442376_AT, 1427040_AT, 1447863_S_AT, 1418713_AT, 1416647_AT, 1426725_S_AT, 1417817_A_AT, 1435436_AT, 1448181_AT, 1421162_A_AT, 1421027_A_AT, 1422912_AT, 1449945_AT, 1419519_AT, 1416967_AT, 1425806_A_AT, 1416301_A_AT, 1426208_X_AT, 1…	648	510	13588	1.23348	1	0.860725	97.2171
GOTERM_BP_FAT	GO:0010557~positive regulation of macromolecule biosynthetic process	31	3.04519	0.185922	1438236_AT, 1418467_AT, 1449130_AT, 1418982_AT, 1416293_AT, 1416778_AT, 1423493_A_AT, 1426018_A_AT, 1421643_AT, 1419155_A_AT, 1420583_A_AT, 1426690_A_AT, 1453103_AT, 1435828_AT, 1442376_AT, 1427040_AT, 1447863_S_AT, 1418713_AT, 1416647_AT, 1426725_S_AT, 1417817_A_AT, 1435436_AT, 1448181_AT, 1421162_A_AT, 1421027_A_AT, 1422912_AT, 1449945_AT, 1419519_AT, 1416967_AT, 1425806_A_AT, 1416301_A_AT, 142…	648	530	13588	1.2265	1	0.862457	97.3183
GOTERM_BP_FAT	GO:0031328~positive regulation of cellular biosynthetic process	32	3.14342	0.191817	1438236_AT, 1418467_AT, 1449130_AT, 1418982_AT, 1416293_AT, 1416778_AT, 1423493_A_AT, 1426018_A_AT, 1421643_AT, 1419155_A_AT, 1420583_A_AT, 1426690_A_AT, 1453103_AT, 1417193_AT, 1435828_AT, 1442376_AT, 1427040_AT, 1447863_S_AT, 1418713_AT, 1416647_AT, 1426725_S_AT, 1417817_A_AT, 1435436_AT, 1448181_AT, 1421162_A_AT, 1421027_A_AT, 1422912_AT, 1449945_AT, 1419519_AT, 1416967_AT, 1425806_A_AT, 14163…	648	552	13588	1.2156	1	0.868643	97.6401
GOTERM_BP_FAT	GO:0009891~positive regulation of biosynthetic process	32	3.14342	0.208572	1438236_AT, 1418467_AT, 1449130_AT, 1418982_AT, 1416293_AT, 1416778_AT, 1423493_A_AT, 1426018_A_AT, 1421643_AT, 1419155_A_AT, 1420583_A_AT, 1426690_A_AT, 1453103_AT, 1417193_AT, 1435828_AT, 1442376_AT, 1427040_AT, 1447863_S_AT, 1418713_AT, 1416647_AT, 1426725_S_AT, 1417817_A_AT, 1435436_AT, 1448181_AT, 1421162_A_AT, 1421027_A_AT, 1422912_AT, 1449945_AT, 1419519_AT, 1416967_AT, 1425806_A_AT, 14163…	648	557	13588	1.20469	1	0.886784	98.3676
SP_PIR_KEYWORDS	activator	27	2.65226	0.424536	1421902_AT, 1438236_AT, 1443260_AT, 1418982_AT, 1416293_AT, 1451332_AT, 1418174_AT, 1421528_A_AT, 1423493_A_AT, 1426018_A_AT, 1421643_AT, 1419155_A_AT, 1420583_A_AT, 1426690_A_AT, 1416826_A_AT, 1435828_AT, 1427040_AT, 1417387_AT, 1435436_AT, 1448181_AT, 1421162_A_AT, 1421027_A_AT, 1417960_AT, 1449945_AT, 1418136_AT, 1416967_AT, 1425806_A_AT, 1416301_A_AT	911	484	17854	1.09329	1	0.907818	99.9609
GOTERM_MF_FAT	GO:0016563~transcription activator activity	13	1.27701	0.620801	1447863_S_AT, 1438236_AT, 1418713_AT, 1416293_AT, 1417817_A_AT, 1437122_AT, 1421027_A_AT, 1421162_A_AT, 1423493_A_AT, 1421643_AT, 1419155_A_AT, 1449945_AT, 1454987_A_AT, 1425806_A_AT	652	259	13288	1.02295	1	0.998307	100
GOTERM_BP_FAT	GO:0006355~regulation of transcription, DNA-dependent	62	6.09037	0.886874	1438236_AT, 1426558_X_AT, 1416293_AT, 1416778_AT, 1418174_AT, 1418517_AT, 1438238_AT, 1426018_A_AT, 1455633_AT, 1421643_AT, 1420583_A_AT, 1426690_A_AT, 1416826_A_AT, 1420858_AT, 1442376_AT, 1447863_S_AT, 1415923_AT, 1416647_AT, 1426725_S_AT, 1427174_AT, 1421027_A_AT, 1422912_AT, 1416967_AT, 1425806_A_AT, 1420772_A_AT, 1415996_AT, 1426208_X_AT, 1424596_S_AT, 1428662_A_AT, 1451566_AT, 1428915_AT, 1…	648	1465	13588	0.887431	1	0.999941	100
GOTERM_BP_FAT	GO:0051252~regulation of RNA metabolic process	63	6.18861	0.887667	1438236_AT, 1426558_X_AT, 1416293_AT, 1416778_AT, 1418174_AT, 1418517_AT, 1438238_AT, 1426018_A_AT, 1455633_AT, 1421643_AT, 1420583_A_AT, 1426690_A_AT, 1416826_A_AT, 1420858_AT, 1442376_AT, 1447863_S_AT, 1415923_AT, 1422528_A_AT, 1416647_AT, 1426725_S_AT, 1427174_AT, 1421027_A_AT, 1422912_AT, 1416967_AT, 1425806_A_AT, 1420772_A_AT, 1415996_AT, 1426208_X_AT, 1424596_S_AT, 1428662_A_AT, 1451566_AT,…	648	1488	13588	0.887806	1	0.999942	100
GOTERM_MF_FAT	GO:0003700~transcription factor activity	28	2.75049	0.979918	1416284_AT, 1428662_A_AT, 1438236_AT, 1418982_AT, 1443260_AT, 1416293_AT, 1418174_AT, 1418517_AT, 1423493_A_AT, 1426018_A_AT, 1428669_AT, 1420583_A_AT, 1426690_A_AT, 1434735_AT, 1423389_AT, 1435828_AT, 1437914_AT, 1447863_S_AT, 1426725_S_AT, 1434002_AT, 1435436_AT, 1448181_AT, 1421162_A_AT, 1421027_A_AT, 1418157_AT, 1416967_AT, 1416301_A_AT, 1420772_A_AT, 1416958_AT	652	776	13288	0.735374	1	1	100
GOTERM_BP_FAT	GO:0006350~transcription	69	6.778	0.980511	1428564_AT, 1421902_AT, 1438236_AT, 1418467_AT, 1426558_X_AT, 1416293_AT, 1418174_AT, 1418517_AT, 1438238_AT, 1426018_A_AT, 1455633_AT, 1421643_AT, 1420583_A_AT, 1426690_A_AT, 1416826_A_AT, 1447863_S_AT, 1415923_AT, 1426725_S_AT, 1423835_AT, 1427174_AT, 1428288_AT, 1421027_A_AT, 1416967_AT, 1425806_A_AT, 1424634_AT, 1415996_AT, 1428296_AT, 1438936_S_AT, 1428662_A_AT, 1451566_AT, 1422064_A_AT, 144…	648	1772	13588	0.816518	1	1	100
GOTERM_MF_FAT	GO:0030528~transcription regulator activity	46	4.51866	0.982252	1424596_S_AT, 1416284_AT, 1428662_A_AT, 1438236_AT, 1418467_AT, 1418982_AT, 1443260_AT, 1416293_AT, 1418174_AT, 1418517_AT, 1423493_A_AT, 1421528_A_AT, 1426018_A_AT, 1421643_AT, 1420619_A_AT, 1428669_AT, 1419155_A_AT, 1454987_A_AT, 1420583_A_AT, 1426690_A_AT, 1423176_AT, 1416826_A_AT, 1425895_A_AT, 1434735_AT, 1416630_AT, 1423389_AT, 1435828_AT, 1437914_AT, 1447863_S_AT, 1418713_AT, 1426725_S_AT,…	652	1206	13288	0.777361	1	1	100
GOTERM_BP_FAT	GO:0045449~regulation of transcription	87	8.54617	0.98882	1428564_AT, 1421902_AT, 1438236_AT, 1418467_AT, 1426558_X_AT, 1416293_AT, 1416778_AT, 1418174_AT, 1418517_AT, 1438238_AT, 1426018_A_AT, 1421643_AT, 1455633_AT, 1420583_A_AT, 1426690_A_AT, 1416826_A_AT, 1420858_AT, 1442376_AT, 1447863_S_AT, 1415923_AT, 1426725_S_AT, 1416647_AT, 1423835_AT, 1427174_AT, 1428288_AT, 1421027_A_AT, 1422912_AT, 1416967_AT, 1425806_A_AT, 1424634_AT, 1420772_A_AT, 1415996…	648	2227	13588	0.81918	1	1	100
GOTERM_MF_FAT	GO:0043565~sequence-specific DNA binding	17	1.66994	0.994076	1447863_S_AT, 1428662_A_AT, 1426725_S_AT, 1443260_AT, 1418982_AT, 1434002_AT, 1418174_AT, 1418517_AT, 1421027_A_AT, 1426018_A_AT, 1418157_AT, 1420583_A_AT, 1426690_A_AT, 1416967_AT, 1434735_AT, 1416958_AT, 1435828_AT	652	556	13288	0.623141	1	1	100
SP_PIR_KEYWORDS	Transcription	69	6.778	0.996202	1428564_AT, 1421902_AT, 1438236_AT, 1418467_AT, 1426558_X_AT, 1416293_AT, 1418174_AT, 1438238_AT, 1418517_AT, 1426018_A_AT, 1455633_AT, 1421643_AT, 1420583_A_AT, 1426690_A_AT, 1416826_A_AT, 1447863_S_AT, 1415923_AT, 1426725_S_AT, 1423835_AT, 1427174_AT, 1428288_AT, 1421027_A_AT, 1416967_AT, 1425806_A_AT, 1449041_A_AT, 1424634_AT, 1415996_AT, 1428296_AT, 1428662_A_AT, 1451566_AT, 1422064_A_AT, 144…	911	1769	17854	0.764431	1	0.999998	100
SP_PIR_KEYWORDS	transcription regulation	58	5.69745	0.997499	1428564_AT, 1421902_AT, 1438236_AT, 1418467_AT, 1416293_AT, 1418174_AT, 1418517_AT, 1426018_A_AT, 1455633_AT, 1421643_AT, 1420583_A_AT, 1426690_A_AT, 1416826_A_AT, 1447863_S_AT, 1415923_AT, 1426725_S_AT, 1423835_AT, 1428288_AT, 1421027_A_AT, 1425806_A_AT, 1449041_A_AT, 1416967_AT, 1424634_AT, 1415996_AT, 1428662_A_AT, 1422064_A_AT, 1418982_AT, 1451332_AT, 1423493_A_AT, 1421528_A_AT, 1425018_AT, 1…	911	1546	17854	0.735251	1	0.999999	100
GOTERM_MF_FAT	GO:0003677~DNA binding	64	6.28684	0.998792	1428564_AT, 1418072_AT, 1438236_AT, 1424854_AT, 1416553_AT, 1416293_AT, 1418174_AT, 1431885_A_AT, 1455095_AT, 1418517_AT, 1431213_A_AT, 1426018_A_AT, 1455633_AT, 1421643_AT, 1449534_AT, 1417661_AT, 1420583_A_AT, 1426690_A_AT, 1447863_S_AT, 1415923_AT, 1422528_A_AT, 1436600_AT, 1426725_S_AT, 1428288_AT, 1421027_A_AT, 1416967_AT, 1420772_A_AT, 1428296_AT, 1426208_X_AT, 1416284_AT, 1428662_A_AT, 142…	652	1781	13288	0.732366	1	1	100
SP_PIR_KEYWORDS	dna-binding	50	4.91159	0.998881	1428564_AT, 1418072_AT, 1438236_AT, 1424854_AT, 1416553_AT, 1416293_AT, 1418174_AT, 1455095_AT, 1418517_AT, 1426018_A_AT, 1455633_AT, 1421643_AT, 1449534_AT, 1417661_AT, 1420583_A_AT, 1426690_A_AT, 1447863_S_AT, 1415923_AT, 1436600_AT, 1422528_A_AT, 1426725_S_AT, 1421027_A_AT, 1428288_AT, 1416967_AT, 1422064_A_AT, 1418982_AT, 1443260_AT, 1418589_A_AT, 1451332_AT, 1423493_A_AT, 1419155_A_AT, 14161…	911	1404	17854	0.697943	1	1	100
SP_PIR_KEYWORDS	nucleus	146	14.3418	0.999989	1421902_AT, 1416293_AT, 1426558_X_AT, 1420827_A_AT, 1418174_AT, 1431885_A_AT, 1455095_AT, 1418517_AT, 1424268_AT, 1416826_A_AT, 1417580_S_AT, 1418377_A_AT, 1418003_AT, 1447863_S_AT, 1418986_A_AT, 1416528_AT, 1422528_A_AT, 1436600_AT, 1423835_AT, 1417883_AT, 1425678_A_AT, 1416938_AT, 1418648_AT, 1420731_A_AT, 1449041_A_AT, 1416967_AT, 1450699_AT, 1417211_A_AT, 1423916_S_AT, 1417203_AT, 1418472_AT,…	911	3808	17854	0.751403	1	1	100
Annotation Cluster 133	Enrichment Score: 0.44010170587695646
Category	Term	Count	%	PValue	Genes	List Total	Pop Hits	Pop Total	Fold Enrichment	Bonferroni	Benjamini	FDR
GOTERM_BP_FAT	GO:0032880~regulation of protein localization	8	0.785855	0.13677	1417426_AT, 1449041_A_AT, 1420858_AT, 1437122_AT, 1427918_A_AT, 1427048_AT, 1416041_AT, 1438936_S_AT	648	90	13588	1.86392	1	0.817457	92.4783
GOTERM_BP_FAT	GO:0070201~regulation of establishment of protein localization	6	0.589391	0.249035	1417426_AT, 1449041_A_AT, 1420858_AT, 1427918_A_AT, 1427048_AT, 1438936_S_AT	648	71	13588	1.77204	1	0.916093	99.3516
GOTERM_BP_FAT	GO:0051051~negative regulation of transport	6	0.589391	0.258102	1417426_AT, 1425457_A_AT, 1420858_AT, 1437122_AT, 1416995_AT, 1427918_A_AT	648	72	13588	1.74743	1	0.920287	99.4763
GOTERM_BP_FAT	GO:0042306~regulation of protein import into nucleus	3	0.294695	0.282086	1449041_A_AT, 1420858_AT, 1427048_AT	648	22	13588	2.85943	1	0.935502	99.7062
GOTERM_BP_FAT	GO:0051223~regulation of protein transport	5	0.491159	0.374551	1417426_AT, 1449041_A_AT, 1420858_AT, 1427048_AT, 1438936_S_AT	648	65	13588	1.61301	1	0.967891	99.974
GOTERM_BP_FAT	GO:0033157~regulation of intracellular protein transport	3	0.294695	0.421668	1449041_A_AT, 1420858_AT, 1427048_AT	648	30	13588	2.09691	1	0.978259	99.9935
GOTERM_BP_FAT	GO:0046822~regulation of nucleocytoplasmic transport	3	0.294695	0.50167	1449041_A_AT, 1420858_AT, 1427048_AT	648	35	13588	1.79735	1	0.988845	99.9995
GOTERM_BP_FAT	GO:0051222~positive regulation of protein transport	3	0.294695	0.5168	1449041_A_AT, 1427048_AT, 1438936_S_AT	648	36	13588	1.74743	1	0.989924	99.9997
GOTERM_BP_FAT	GO:0032386~regulation of intracellular transport	3	0.294695	0.600965	1449041_A_AT, 1420858_AT, 1427048_AT	648	42	13588	1.4978	1	0.995664	100
GOTERM_BP_FAT	GO:0060341~regulation of cellular localization	8	0.785855	0.650856	1417426_AT, 1449041_A_AT, 1420858_AT, 1417788_AT, 1427048_AT, 1433694_AT, 1438936_S_AT, 1451499_AT	648	161	13588	1.04194	1	0.997192	100
Annotation Cluster 134	Enrichment Score: 0.4358457949739478
Category	Term	Count	%	PValue	Genes	List Total	Pop Hits	Pop Total	Fold Enrichment	Bonferroni	Benjamini	FDR
GOTERM_BP_FAT	GO:0051604~protein maturation	7	0.687623	0.307102	1417426_AT, 1416625_AT, 1450843_A_AT, 1415949_AT, 1423153_X_AT, 1428333_AT, 1428853_AT	648	96	13588	1.529	1	0.945327	99.8426
GOTERM_BP_FAT	GO:0051605~protein maturation by peptide bond cleavage	5	0.491159	0.374551	1417426_AT, 1416625_AT, 1415949_AT, 1423153_X_AT, 1428333_AT	648	65	13588	1.61301	1	0.967891	99.974
GOTERM_BP_FAT	GO:0016485~protein processing	6	0.589391	0.428222	1417426_AT, 1416625_AT, 1415949_AT, 1423153_X_AT, 1428333_AT, 1428853_AT	648	90	13588	1.39794	1	0.978784	99.9946
Annotation Cluster 135	Enrichment Score: 0.43434129547850486
Category	Term	Count	%	PValue	Genes	List Total	Pop Hits	Pop Total	Fold Enrichment	Bonferroni	Benjamini	FDR
GOTERM_BP_FAT	GO:0030041~actin filament polymerization	3	0.294695	0.0523691	1424826_S_AT, 1415812_AT, 1438936_S_AT	648	8	13588	7.86343	1	0.627242	61.1823
GOTERM_BP_FAT	GO:0008154~actin polymerization or depolymerization	3	0.294695	0.124886	1424826_S_AT, 1415812_AT, 1438936_S_AT	648	13	13588	4.83903	1	0.800388	90.4328
GOTERM_BP_FAT	GO:0007015~actin filament organization	6	0.589391	0.126893	1424826_S_AT, 1457465_AT, 1415812_AT, 1437122_AT, 1427735_A_AT, 1438936_S_AT	648	56	13588	2.24669	1	0.801135	90.8116
GOTERM_BP_FAT	GO:0051262~protein tetramerization	3	0.294695	0.300006	1418713_AT, 1418509_AT, 1449106_AT	648	23	13588	2.7351	1	0.941275	99.8117
GOTERM_BP_FAT	GO:0051258~protein polymerization	3	0.294695	0.57419	1424826_S_AT, 1415812_AT, 1438936_S_AT	648	40	13588	1.57269	1	0.994089	100
GOTERM_BP_FAT	GO:0051259~protein oligomerization	4	0.392927	0.673046	1417500_A_AT, 1418713_AT, 1418509_AT, 1449106_AT	648	72	13588	1.16495	1	0.997762	100
GOTERM_BP_FAT	GO:0051260~protein homooligomerization	3	0.294695	0.725601	1417500_A_AT, 1418713_AT, 1449106_AT	648	53	13588	1.18693	1	0.998803	100
GOTERM_BP_FAT	GO:0070271~protein complex biogenesis	9	0.884086	0.852586	1417500_A_AT, 1418713_AT, 1418509_AT, 1424826_S_AT, 1415812_AT, 1449106_AT, 1434960_AT, 1438936_S_AT, 1418551_AT	648	227	13588	0.831375	1	0.999863	100
GOTERM_BP_FAT	GO:0006461~protein complex assembly	9	0.884086	0.852586	1417500_A_AT, 1418713_AT, 1418509_AT, 1424826_S_AT, 1415812_AT, 1449106_AT, 1434960_AT, 1438936_S_AT, 1418551_AT	648	227	13588	0.831375	1	0.999863	100
GOTERM_BP_FAT	GO:0043623~cellular protein complex assembly	4	0.392927	0.893625	1424826_S_AT, 1415812_AT, 1438936_S_AT, 1418551_AT	648	108	13588	0.776635	1	0.999951	100
Annotation Cluster 136	Enrichment Score: 0.43065886874579057
Category	Term	Count	%	PValue	Genes	List Total	Pop Hits	Pop Total	Fold Enrichment	Bonferroni	Benjamini	FDR
GOTERM_BP_FAT	GO:0009611~response to wounding	22	2.1611	0.154424	1425546_A_AT, 1417018_AT, 1421287_A_AT, 1416330_AT, 1419100_AT, 1416625_AT, 1448499_A_AT, 1441281_S_AT, 1437122_AT, 1419144_AT, 1415800_AT, 1450852_S_AT, 1416034_AT, 1447520_AT, 1419088_AT, 1416006_AT, 1450759_AT, 1423153_X_AT, 1416335_AT, 1416630_AT, 1417193_AT, 1421991_A_AT	648	347	13588	1.32946	1	0.839126	94.7706
GOTERM_BP_FAT	GO:0006954~inflammatory response	12	1.17878	0.508323	1425546_A_AT, 1416034_AT, 1450852_S_AT, 1447520_AT, 1416625_AT, 1419100_AT, 1450759_AT, 1423153_X_AT, 1448499_A_AT, 1416335_AT, 1419144_AT, 1421991_A_AT	648	225	13588	1.11835	1	0.989396	99.9996
GOTERM_BP_FAT	GO:0006952~defense response	21	2.06287	0.650384	1425546_A_AT, 1419100_AT, 1416625_AT, 1435290_X_AT, 1449130_AT, 1448499_A_AT, 1437122_AT, 1419144_AT, 1435751_AT, 1427038_AT, 1450852_S_AT, 1416034_AT, 1447520_AT, 1450759_AT, 1418142_AT, 1423153_X_AT, 1423916_S_AT, 1416335_AT, 1422470_AT, 1421991_A_AT, 1423547_AT	648	448	13588	0.982928	1	0.997246	100
Annotation Cluster 137	Enrichment Score: 0.42728883855416433
Category	Term	Count	%	PValue	Genes	List Total	Pop Hits	Pop Total	Fold Enrichment	Bonferroni	Benjamini	FDR
GOTERM_BP_FAT	GO:0009612~response to mechanical stimulus	6	0.589391	0.0364245	1457218_AT, 1416999_AT, 1416967_AT, 1417622_AT, 1448416_AT, 1422627_A_AT	648	39	13588	3.22602	1	0.557639	47.9389
GOTERM_BP_FAT	GO:0050910~detection of mechanical stimulus involved in sensory perception of sound	3	0.294695	0.065253	1416967_AT, 1417622_AT, 1422627_A_AT	648	9	13588	6.98971	1	0.666351	69.49
GOTERM_BP_FAT	GO:0050974~detection of mechanical stimulus involved in sensory perception	3	0.294695	0.158136	1416967_AT, 1417622_AT, 1422627_A_AT	648	15	13588	4.19383	1	0.838968	95.1602
GOTERM_BP_FAT	GO:0050982~detection of mechanical stimulus	3	0.294695	0.192775	1416967_AT, 1417622_AT, 1422627_A_AT	648	17	13588	3.70044	1	0.869084	97.6889
GOTERM_BP_FAT	GO:0007605~sensory perception of sound	5	0.491159	0.571838	1416967_AT, 1417622_AT, 1420387_AT, 1437745_AT, 1422627_A_AT	648	84	13588	1.24816	1	0.994043	100
GOTERM_BP_FAT	GO:0050906~detection of stimulus involved in sensory perception	3	0.294695	0.613869	1416967_AT, 1417622_AT, 1422627_A_AT	648	43	13588	1.46296	1	0.996182	100
GOTERM_BP_FAT	GO:0050954~sensory perception of mechanical stimulus	5	0.491159	0.643893	1416967_AT, 1417622_AT, 1420387_AT, 1437745_AT, 1422627_A_AT	648	92	13588	1.13963	1	0.997067	100
GOTERM_BP_FAT	GO:0009582~detection of abiotic stimulus	3	0.294695	0.715794	1416967_AT, 1417622_AT, 1422627_A_AT	648	52	13588	1.20976	1	0.99868	100
GOTERM_BP_FAT	GO:0009581~detection of external stimulus	3	0.294695	0.786487	1416967_AT, 1417622_AT, 1422627_A_AT	648	60	13588	1.04846	1	0.999528	100
GOTERM_BP_FAT	GO:0051606~detection of stimulus	4	0.392927	0.808754	1416967_AT, 1417622_AT, 1417193_AT, 1422627_A_AT	648	90	13588	0.931962	1	0.999678	100
GOTERM_BP_FAT	GO:0050890~cognition	12	1.17878	1	1427038_AT, 1415923_AT, 1416967_AT, 1417622_AT, 1427465_AT, 1448499_A_AT, 1420387_AT, 1437745_AT, 1430640_A_AT, 1427282_A_AT, 1435436_AT, 1422627_A_AT	648	1480	13588	0.17002	1	1	100
GOTERM_BP_FAT	GO:0007600~sensory perception	10	0.982318	1	1427038_AT, 1415923_AT, 1416967_AT, 1417622_AT, 1448499_A_AT, 1420387_AT, 1437745_AT, 1427282_A_AT, 1435436_AT, 1422627_A_AT	648	1402	13588	0.149566	1	1	100
Annotation Cluster 138	Enrichment Score: 0.4142865299661236
Category	Term	Count	%	PValue	Genes	List Total	Pop Hits	Pop Total	Fold Enrichment	Bonferroni	Benjamini	FDR
GOTERM_BP_FAT	GO:0001504~neurotransmitter uptake	3	0.294695	0.0405335	1416526_A_AT, 1427465_AT, 1424562_A_AT	648	7	13588	8.98677	1	0.568872	51.7093
GOTERM_BP_FAT	GO:0001505~regulation of neurotransmitter levels	6	0.589391	0.172039	1416526_A_AT, 1453065_AT, 1417702_A_AT, 1427465_AT, 1424562_A_AT, 1418701_AT	648	62	13588	2.02927	1	0.849781	96.3892
GOTERM_BP_FAT	GO:0007267~cell-cell signaling	15	1.47348	0.523418	1416526_A_AT, 1453065_AT, 1423136_AT, 1417307_AT, 1417702_A_AT, 1427465_AT, 1424562_A_AT, 1422912_AT, 1415800_AT, 1418701_AT, 1416034_AT, 1416967_AT, 1417283_AT, 1427048_AT, 1423104_AT	648	290	13588	1.08461	1	0.990653	99.9998
GOTERM_BP_FAT	GO:0007268~synaptic transmission	9	0.884086	0.617183	1416034_AT, 1416526_A_AT, 1417307_AT, 1453065_AT, 1417702_A_AT, 1427465_AT, 1424562_A_AT, 1417283_AT, 1418701_AT	648	178	13588	1.06024	1	0.996321	100
GOTERM_BP_FAT	GO:0006836~neurotransmitter transport	4	0.392927	0.74052	1416526_A_AT, 1424338_AT, 1427465_AT, 1424562_A_AT	648	80	13588	1.04846	1	0.999008	100
GOTERM_BP_FAT	GO:0019226~transmission of nerve impulse	10	0.982318	0.754665	1429735_AT, 1416034_AT, 1416526_A_AT, 1417307_AT, 1453065_AT, 1417702_A_AT, 1427465_AT, 1424562_A_AT, 1417283_AT, 1418701_AT	648	226	13588	0.927838	1	0.999209	100
GOTERM_BP_FAT	GO:0050877~neurological system process	23	2.25933	1	1429735_AT, 1416526_A_AT, 1415923_AT, 1417307_AT, 1453065_AT, 1417702_A_AT, 1427465_AT, 1448499_A_AT, 1420387_AT, 1435436_AT, 1424562_A_AT, 1418701_AT, 1427038_AT, 1416034_AT, 1436739_AT, 1416967_AT, 1417622_AT, 1430640_A_AT, 1427282_A_AT, 1437745_AT, 1417193_AT, 1422627_A_AT, 1417283_AT	648	1681	13588	0.286907	1	1	100
Annotation Cluster 139	Enrichment Score: 0.41231724192106284
Category	Term	Count	%	PValue	Genes	List Total	Pop Hits	Pop Total	Fold Enrichment	Bonferroni	Benjamini	FDR
GOTERM_BP_FAT	GO:0008344~adult locomotory behavior	6	0.589391	0.172039	1447863_S_AT, 1416526_A_AT, 1427465_AT, 1437745_AT, 1427282_A_AT, 1417788_AT	648	62	13588	2.02927	1	0.849781	96.3892
GOTERM_BP_FAT	GO:0030534~adult behavior	7	0.687623	0.282067	1447863_S_AT, 1416526_A_AT, 1416225_AT, 1427465_AT, 1437745_AT, 1427282_A_AT, 1417788_AT	648	93	13588	1.57832	1	0.936086	99.7061
GOTERM_BP_FAT	GO:0007610~behavior	19	1.8664	0.653385	1447863_S_AT, 1416526_A_AT, 1417574_AT, 1416225_AT, 1427465_AT, 1437122_AT, 1452141_A_AT, 1427038_AT, 1439096_AT, 1447520_AT, 1457218_AT, 1436739_AT, 1430640_A_AT, 1427282_A_AT, 1437745_AT, 1417788_AT, 1417193_AT, 1422627_A_AT, 1415894_AT	648	405	13588	0.983737	1	0.997155	100
GOTERM_BP_FAT	GO:0007626~locomotory behavior	11	1.08055	0.707267	1447863_S_AT, 1416526_A_AT, 1447520_AT, 1417574_AT, 1427465_AT, 1437745_AT, 1427282_A_AT, 1417193_AT, 1417788_AT, 1415894_AT, 1452141_A_AT	648	239	13588	0.965107	1	0.998562	100
Annotation Cluster 140	Enrichment Score: 0.41006108653517426
Category	Term	Count	%	PValue	Genes	List Total	Pop Hits	Pop Total	Fold Enrichment	Bonferroni	Benjamini	FDR
GOTERM_BP_FAT	GO:0007584~response to nutrient	6	0.589391	0.295075	1416225_AT, 1416647_AT, 1416967_AT, 1437122_AT, 1448416_AT, 1418788_AT	648	76	13588	1.65546	1	0.939585	99.7869
GOTERM_BP_FAT	GO:0032526~response to retinoic acid	3	0.294695	0.404872	1416225_AT, 1416967_AT, 1418788_AT	648	29	13588	2.16922	1	0.974806	99.9892
GOTERM_BP_FAT	GO:0033189~response to vitamin A	3	0.294695	0.421668	1416225_AT, 1416967_AT, 1418788_AT	648	30	13588	2.09691	1	0.978259	99.9935
GOTERM_BP_FAT	GO:0033273~response to vitamin	3	0.294695	0.454501	1416225_AT, 1416967_AT, 1418788_AT	648	32	13588	1.96586	1	0.983366	99.9977
Annotation Cluster 141	Enrichment Score: 0.4099441690368828
Category	Term	Count	%	PValue	Genes	List Total	Pop Hits	Pop Total	Fold Enrichment	Bonferroni	Benjamini	FDR
GOTERM_BP_FAT	GO:0008643~carbohydrate transport	5	0.491159	0.31982	1452626_A_AT, 1448181_AT, 1435387_AT, 1428245_AT, 1426599_A_AT	648	60	13588	1.74743	1	0.949954	99.8864
GOTERM_BP_FAT	GO:0015758~glucose transport	3	0.294695	0.387846	1448181_AT, 1428245_AT, 1426599_A_AT	648	28	13588	2.24669	1	0.971673	99.9822
GOTERM_BP_FAT	GO:0008645~hexose transport	3	0.294695	0.421668	1448181_AT, 1428245_AT, 1426599_A_AT	648	30	13588	2.09691	1	0.978259	99.9935
GOTERM_BP_FAT	GO:0015749~monosaccharide transport	3	0.294695	0.438215	1448181_AT, 1428245_AT, 1426599_A_AT	648	31	13588	2.02927	1	0.981001	99.9961
Annotation Cluster 142	Enrichment Score: 0.40702050550279467
Category	Term	Count	%	PValue	Genes	List Total	Pop Hits	Pop Total	Fold Enrichment	Bonferroni	Benjamini	FDR
SP_PIR_KEYWORDS	muscle protein	7	0.687623	0.0406469	1448394_AT, 1448371_AT, 1452670_AT, 1427735_A_AT, 1422743_AT, 1416454_S_AT, 1418551_AT	911	50	17854	2.74375	1	0.367757	44.5264
COG_ONTOLOGY	Signal transduction mechanisms / Cytoskeleton / Cell division and chromosome partitioning / General function prediction only	5	0.491159	0.177211	1427483_AT, 1448394_AT, 1424382_AT, 1448371_AT, 1452670_AT	95	48	2040	2.23684	0.97978	0.622911	77.3395
GOTERM_CC_FAT	GO:0015629~actin cytoskeleton	15	1.47348	0.226111	1434180_AT, 1424826_S_AT, 1424092_AT, 1418209_A_AT, 1448371_AT, 1416454_S_AT, 1418551_AT, 1448394_AT, 1455213_AT, 1423452_AT, 1453103_AT, 1457465_AT, 1460694_S_AT, 1452670_AT, 1427735_A_AT, 1442376_AT	681	205	12504	1.3435	1	0.791407	97.0954
UP_SEQ_FEATURE	domain:EF-hand 3	7	0.687623	0.316742	1427483_AT, 1448394_AT, 1424382_AT, 1448371_AT, 1428440_AT, 1452670_AT, 1423155_AT	905	82	16021	1.51121	1	0.999994	99.8637
GOTERM_CC_FAT	GO:0016459~myosin complex	5	0.491159	0.425566	1448394_AT, 1457465_AT, 1448371_AT, 1452670_AT, 1418551_AT	681	61	12504	1.50502	1	0.924585	99.9526
INTERPRO	IPR018248:EF hand	7	0.687623	0.619673	1427483_AT, 1448394_AT, 1417421_AT, 1448371_AT, 1452670_AT, 1448507_AT, 1423155_AT	860	132	17763	1.09532	1	0.999959	100
SP_PIR_KEYWORDS	myosin	3	0.294695	0.698928	1448394_AT, 1448371_AT, 1452670_AT	911	47	17854	1.25095	1	0.981655	100
KEGG_PATHWAY	mmu04530:Tight junction	5	0.491159	0.912628	1448394_AT, 1424092_AT, 1448371_AT, 1452670_AT, 1427510_AT	288	135	5738	0.737912	1	0.989274	100
SP_PIR_KEYWORDS	motor protein	3	0.294695	0.987991	1448394_AT, 1448371_AT, 1452670_AT	911	123	17854	0.478006	1	0.999984	100
GOTERM_MF_FAT	GO:0003774~motor activity	3	0.294695	0.992299	1448394_AT, 1448371_AT, 1452670_AT	652	138	13288	0.443051	1	1	100
Annotation Cluster 143	Enrichment Score: 0.4055824981561613
Category	Term	Count	%	PValue	Genes	List Total	Pop Hits	Pop Total	Fold Enrichment	Bonferroni	Benjamini	FDR
PIR_SUPERFAMILY	PIRSF005438:class II small leucine-rich proteoglycan	3	0.294695	0.0286912	1415939_AT, 1423607_AT, 1416321_S_AT	463	5	8136	10.5434	1	0.913721	34.2819
SMART	SM00013:LRRNT	9	0.884086	0.0482558	1449368_AT, 1434210_S_AT, 1433891_AT, 1419662_AT, 1415939_AT, 1418450_AT, 1428259_AT, 1423607_AT, 1416321_S_AT	397	93	9131	2.22581	0.999987	0.676212	46.911
INTERPRO	IPR000372:Leucine-rich repeat, cysteine-rich flanking region, N-terminal	9	0.884086	0.080722	1449368_AT, 1434210_S_AT, 1433891_AT, 1419662_AT, 1415939_AT, 1418450_AT, 1428259_AT, 1423607_AT, 1416321_S_AT	860	93	17763	1.99884	1	0.878632	74.7881
SMART	SM00369:LRR_TYP	10	0.982318	0.10757	1449368_AT, 1429005_AT, 1434210_S_AT, 1433891_AT, 1419662_AT, 1415939_AT, 1418450_AT, 1428259_AT, 1423607_AT, 1417290_AT	397	129	9131	1.78295	1	0.763443	76.7072
INTERPRO	IPR003591:Leucine-rich repeat, typical subtype	10	0.982318	0.172666	1449368_AT, 1429005_AT, 1434210_S_AT, 1433891_AT, 1419662_AT, 1415939_AT, 1418450_AT, 1428259_AT, 1423607_AT, 1417290_AT	860	129	17763	1.60114	1	0.968197	95.5085
UP_SEQ_FEATURE	repeat:LRR 12	7	0.687623	0.286825	1449368_AT, 1429005_AT, 1434210_S_AT, 1433891_AT, 1415939_AT, 1423607_AT, 1416321_S_AT	905	79	16021	1.5686	1	0.999989	99.7136
UP_SEQ_FEATURE	repeat:LRR 11	7	0.687623	0.377709	1449368_AT, 1429005_AT, 1434210_S_AT, 1433891_AT, 1415939_AT, 1423607_AT, 1416321_S_AT	905	88	16021	1.40817	1	0.999999	99.973
INTERPRO	IPR001611:Leucine-rich repeat	12	1.17878	0.387067	1449368_AT, 1429005_AT, 1429212_A_AT, 1434210_S_AT, 1433891_AT, 1419662_AT, 1415939_AT, 1418450_AT, 1428259_AT, 1423607_AT, 1416321_S_AT, 1417290_AT	860	202	17763	1.22701	1	0.998684	99.9669
UP_SEQ_FEATURE	repeat:LRR 10	7	0.687623	0.527971	1449368_AT, 1429005_AT, 1434210_S_AT, 1433891_AT, 1415939_AT, 1423607_AT, 1416321_S_AT	905	103	16021	1.2031	1	1	99.9998
UP_SEQ_FEATURE	repeat:LRR 7	10	0.982318	0.529501	1449368_AT, 1429005_AT, 1434210_S_AT, 1456038_AT, 1433891_AT, 1419662_AT, 1415939_AT, 1428259_AT, 1423607_AT, 1416321_S_AT	905	157	16021	1.12756	1	1	99.9998
UP_SEQ_FEATURE	repeat:LRR 6	11	1.08055	0.601599	1449368_AT, 1429005_AT, 1434210_S_AT, 1456038_AT, 1433891_AT, 1419662_AT, 1415939_AT, 1418450_AT, 1428259_AT, 1423607_AT, 1416321_S_AT	905	185	16021	1.0526	1	1	100
UP_SEQ_FEATURE	repeat:LRR 8	8	0.785855	0.62932	1449368_AT, 1429005_AT, 1434210_S_AT, 1456038_AT, 1433891_AT, 1415939_AT, 1423607_AT, 1416321_S_AT	905	133	16021	1.06483	1	1	100
SP_PIR_KEYWORDS	leucine-rich repeat	14	1.37525	0.649899	1429005_AT, 1456038_AT, 1419662_AT, 1456878_AT, 1433891_AT, 1415939_AT, 1418450_AT, 1423607_AT, 1416321_S_AT, 1417290_AT, 1449368_AT, 1429212_A_AT, 1434210_S_AT, 1428259_AT	911	275	17854	0.997729	1	0.975629	100
UP_SEQ_FEATURE	repeat:LRR 9	7	0.687623	0.692401	1449368_AT, 1429005_AT, 1434210_S_AT, 1433891_AT, 1415939_AT, 1423607_AT, 1416321_S_AT	905	122	16021	1.01573	1	1	100
SMART	SM00082:LRRCT	4	0.392927	0.704735	1434210_S_AT, 1418450_AT, 1428259_AT, 1417290_AT	397	83	9131	1.10843	1	0.996161	100
UP_SEQ_FEATURE	repeat:LRR 4	12	1.17878	0.708632	1449368_AT, 1429005_AT, 1429212_A_AT, 1434210_S_AT, 1456038_AT, 1433891_AT, 1419662_AT, 1415939_AT, 1418450_AT, 1428259_AT, 1423607_AT, 1416321_S_AT	905	221	16021	0.961236	1	1	100
UP_SEQ_FEATURE	repeat:LRR 5	11	1.08055	0.715347	1449368_AT, 1429005_AT, 1434210_S_AT, 1456038_AT, 1433891_AT, 1419662_AT, 1415939_AT, 1418450_AT, 1428259_AT, 1423607_AT, 1416321_S_AT	905	203	16021	0.959263	1	1	100
INTERPRO	IPR000483:Cysteine-rich flanking region, C-terminal	4	0.392927	0.771819	1434210_S_AT, 1418450_AT, 1428259_AT, 1417290_AT	860	83	17763	0.995405	1	0.999999	100
UP_SEQ_FEATURE	repeat:LRR 3	12	1.17878	0.822115	1449368_AT, 1429005_AT, 1429212_A_AT, 1434210_S_AT, 1456038_AT, 1433891_AT, 1419662_AT, 1415939_AT, 1418450_AT, 1428259_AT, 1423607_AT, 1416321_S_AT	905	245	16021	0.867074	1	1	100
UP_SEQ_FEATURE	repeat:LRR 14	3	0.294695	0.824686	1429005_AT, 1434210_S_AT, 1433891_AT	905	55	16021	0.965605	1	1	100
UP_SEQ_FEATURE	repeat:LRR 2	13	1.27701	0.825726	1429005_AT, 1456038_AT, 1419662_AT, 1456878_AT, 1433891_AT, 1415939_AT, 1418450_AT, 1423607_AT, 1416321_S_AT, 1449368_AT, 1429212_A_AT, 1434210_S_AT, 1428259_AT	905	266	16021	0.865173	1	1	100
UP_SEQ_FEATURE	repeat:LRR 1	13	1.27701	0.825726	1429005_AT, 1456038_AT, 1419662_AT, 1456878_AT, 1433891_AT, 1415939_AT, 1418450_AT, 1423607_AT, 1416321_S_AT, 1449368_AT, 1429212_A_AT, 1434210_S_AT, 1428259_AT	905	266	16021	0.865173	1	1	100
UP_SEQ_FEATURE	repeat:LRR 13	3	0.294695	0.888425	1429005_AT, 1434210_S_AT, 1433891_AT	905	65	16021	0.817051	1	1	100
Annotation Cluster 144	Enrichment Score: 0.4051922110084712
Category	Term	Count	%	PValue	Genes	List Total	Pop Hits	Pop Total	Fold Enrichment	Bonferroni	Benjamini	FDR
SMART	SM00049:DEP	3	0.294695	0.246884	1428622_AT, 1424470_A_AT, 1452353_AT	397	22	9131	3.13636	1	0.924668	97.3483
INTERPRO	IPR000591:Pleckstrin/G-protein, interacting region	3	0.294695	0.288254	1428622_AT, 1424470_A_AT, 1452353_AT	860	22	17763	2.81654	1	0.99443	99.6176
INTERPRO	IPR011991:Winged helix repressor DNA-binding	7	0.687623	0.855373	1428622_AT, 1416101_A_AT, 1426725_S_AT, 1424470_A_AT, 1452353_AT, 1434002_AT, 1437914_AT	860	175	17763	0.826186	1	1	100
Annotation Cluster 145	Enrichment Score: 0.40253915311823535
Category	Term	Count	%	PValue	Genes	List Total	Pop Hits	Pop Total	Fold Enrichment	Bonferroni	Benjamini	FDR
GOTERM_MF_FAT	GO:0019899~enzyme binding	14	1.37525	0.332437	1426743_AT, 1417307_AT, 1423771_AT, 1435436_AT, 1452398_AT, 1433694_AT, 1421027_A_AT, 1448740_AT, 1416034_AT, 1444028_S_AT, 1421594_A_AT, 1449041_A_AT, 1423104_AT, 1456609_AT	652	229	13288	1.24596	1	0.96892	99.801
GOTERM_MF_FAT	GO:0019900~kinase binding	6	0.589391	0.404071	1416034_AT, 1423771_AT, 1449041_A_AT, 1433694_AT, 1423104_AT, 1456609_AT	652	85	13288	1.43861	1	0.984094	99.9653
GOTERM_MF_FAT	GO:0019901~protein kinase binding	5	0.491159	0.461546	1416034_AT, 1423771_AT, 1433694_AT, 1423104_AT, 1456609_AT	652	71	13288	1.43524	1	0.990288	99.9927
Annotation Cluster 146	Enrichment Score: 0.39925713422361275
Category	Term	Count	%	PValue	Genes	List Total	Pop Hits	Pop Total	Fold Enrichment	Bonferroni	Benjamini	FDR
GOTERM_BP_FAT	GO:0007266~Rho protein signal transduction	4	0.392927	0.135325	1434140_AT, 1421287_A_AT, 1418892_AT, 1424376_AT	648	27	13588	3.10654	1	0.81686	92.2536
GOTERM_BP_FAT	GO:0007265~Ras protein signal transduction	4	0.392927	0.537867	1434140_AT, 1421287_A_AT, 1418892_AT, 1424376_AT	648	59	13588	1.42164	1	0.991809	99.9999
GOTERM_BP_FAT	GO:0007264~small GTPase mediated signal transduction	10	0.982318	0.871318	1434140_AT, 1421287_A_AT, 1423854_A_AT, 1418341_AT, 1418892_AT, 1424470_A_AT, 1452281_AT, 1452398_AT, 1427918_A_AT, 1424376_AT	648	258	13588	0.812757	1	0.999909	100
Annotation Cluster 147	Enrichment Score: 0.39907272133548016
Category	Term	Count	%	PValue	Genes	List Total	Pop Hits	Pop Total	Fold Enrichment	Bonferroni	Benjamini	FDR
GOTERM_MF_FAT	GO:0030551~cyclic nucleotide binding	3	0.294695	0.293503	1444232_AT, 1424470_A_AT, 1430640_A_AT	652	22	13288	2.77914	1	0.960112	99.5238
INTERPRO	IPR018488:Cyclic nucleotide-binding, conserved site	3	0.294695	0.395336	1444232_AT, 1424470_A_AT, 1430640_A_AT	860	28	17763	2.213	1	0.998827	99.9735
SMART	SM00100:cNMP	3	0.294695	0.407127	1444232_AT, 1424470_A_AT, 1430640_A_AT	397	32	9131	2.15625	1	0.963517	99.876
INTERPRO	IPR000595:Cyclic nucleotide-binding	3	0.294695	0.462556	1444232_AT, 1424470_A_AT, 1430640_A_AT	860	32	17763	1.93637	1	0.999406	99.9962
INTERPRO	IPR014710:RmlC-like jelly roll fold	3	0.294695	0.462556	1444232_AT, 1424470_A_AT, 1430640_A_AT	860	32	17763	1.93637	1	0.999406	99.9962
Annotation Cluster 148	Enrichment Score: 0.39698311506262407
Category	Term	Count	%	PValue	Genes	List Total	Pop Hits	Pop Total	Fold Enrichment	Bonferroni	Benjamini	FDR
GOTERM_MF_FAT	GO:0046983~protein dimerization activity	20	1.96464	0.305241	1416204_AT, 1447863_S_AT, 1417271_A_AT, 1416225_AT, 1418982_AT, 1443260_AT, 1416178_A_AT, 1417817_A_AT, 1437122_AT, 1418174_AT, 1435436_AT, 1426018_A_AT, 1418412_AT, 1421643_AT, 1417956_AT, 1449534_AT, 1454987_A_AT, 1425560_A_AT, 1421340_AT, 1434735_AT	652	340	13288	1.19885	1	0.960451	99.632
GOTERM_MF_FAT	GO:0042802~identical protein binding	16	1.57171	0.445046	1416204_AT, 1417421_AT, 1417271_A_AT, 1416225_AT, 1418982_AT, 1452387_A_AT, 1416178_A_AT, 1417817_A_AT, 1417725_A_AT, 1418412_AT, 1417956_AT, 1421643_AT, 1425560_A_AT, 1421340_AT, 1448643_AT, 1427191_AT	652	290	13288	1.12443	1	0.988789	99.9884
GOTERM_MF_FAT	GO:0042803~protein homodimerization activity	11	1.08055	0.474245	1418412_AT, 1416204_AT, 1421643_AT, 1417956_AT, 1417271_A_AT, 1416225_AT, 1425560_A_AT, 1421340_AT, 1418982_AT, 1417817_A_AT, 1416178_A_AT	652	193	13288	1.16158	1	0.991141	99.995
Annotation Cluster 149	Enrichment Score: 0.3969554837489065
Category	Term	Count	%	PValue	Genes	List Total	Pop Hits	Pop Total	Fold Enrichment	Bonferroni	Benjamini	FDR
GOTERM_BP_FAT	GO:0001755~neural crest cell migration	3	0.294695	0.300006	1420696_AT, 1423594_A_AT, 1427048_AT	648	23	13588	2.7351	1	0.941275	99.8117
GOTERM_BP_FAT	GO:0001667~ameboidal cell migration	4	0.392927	0.362827	1420696_AT, 1417574_AT, 1423594_A_AT, 1427048_AT	648	45	13588	1.86392	1	0.964298	99.964
GOTERM_BP_FAT	GO:0014031~mesenchymal cell development	4	0.392927	0.38905	1420696_AT, 1423594_A_AT, 1437122_AT, 1427048_AT	648	47	13588	1.78461	1	0.971777	99.9828
GOTERM_BP_FAT	GO:0048762~mesenchymal cell differentiation	4	0.392927	0.415	1420696_AT, 1423594_A_AT, 1437122_AT, 1427048_AT	648	49	13588	1.71177	1	0.977198	99.992
GOTERM_BP_FAT	GO:0060485~mesenchyme development	4	0.392927	0.427844	1420696_AT, 1423594_A_AT, 1437122_AT, 1427048_AT	648	50	13588	1.67753	1	0.978919	99.9946
GOTERM_BP_FAT	GO:0014033~neural crest cell differentiation	3	0.294695	0.470513	1420696_AT, 1423594_A_AT, 1427048_AT	648	33	13588	1.90629	1	0.985578	99.9986
GOTERM_BP_FAT	GO:0014032~neural crest cell development	3	0.294695	0.470513	1420696_AT, 1423594_A_AT, 1427048_AT	648	33	13588	1.90629	1	0.985578	99.9986
Annotation Cluster 150	Enrichment Score: 0.39521979949200764
Category	Term	Count	%	PValue	Genes	List Total	Pop Hits	Pop Total	Fold Enrichment	Bonferroni	Benjamini	FDR
UP_SEQ_FEATURE	DNA-binding region:HMG box	4	0.392927	0.379014	1426018_A_AT, 1419155_A_AT, 1436600_AT, 1416967_AT	905	39	16021	1.81567	1	0.999999	99.974
SMART	SM00398:HMG	4	0.392927	0.381811	1426018_A_AT, 1419155_A_AT, 1436600_AT, 1416967_AT	397	51	9131	1.80392	1	0.963955	99.7882
INTERPRO	IPR000910:High mobility group, HMG1/HMG2	4	0.392927	0.450648	1426018_A_AT, 1419155_A_AT, 1436600_AT, 1416967_AT	860	51	17763	1.61997	1	0.999323	99.9945
Annotation Cluster 151	Enrichment Score: 0.3906388878916061
Category	Term	Count	%	PValue	Genes	List Total	Pop Hits	Pop Total	Fold Enrichment	Bonferroni	Benjamini	FDR
GOTERM_MF_FAT	GO:0004879~ligand-dependent nuclear receptor activity	5	0.491159	0.293884	1447863_S_AT, 1418157_AT, 1454987_A_AT, 1420583_A_AT, 1416958_AT	652	56	13288	1.81968	1	0.958846	99.5277
SMART	SM00399:ZnF_C4	4	0.392927	0.333882	1447863_S_AT, 1418157_AT, 1420583_A_AT, 1416958_AT	397	47	9131	1.95745	1	0.959004	99.4492
SMART	SM00430:HOLI	4	0.392927	0.357908	1447863_S_AT, 1418157_AT, 1420583_A_AT, 1416958_AT	397	49	9131	1.87755	1	0.961549	99.6558
INTERPRO	IPR001628:Zinc finger, nuclear hormone receptor-type	4	0.392927	0.398608	1447863_S_AT, 1418157_AT, 1420583_A_AT, 1416958_AT	860	47	17763	1.75784	1	0.998833	99.9758
INTERPRO	IPR001723:Steroid hormone receptor	4	0.392927	0.411766	1447863_S_AT, 1418157_AT, 1420583_A_AT, 1416958_AT	860	48	17763	1.72122	1	0.999001	99.9831
INTERPRO	IPR000536:Nuclear hormone receptor, ligand-binding, core	4	0.392927	0.424832	1447863_S_AT, 1418157_AT, 1420583_A_AT, 1416958_AT	860	49	17763	1.68609	1	0.999084	99.9883
INTERPRO	IPR008946:Nuclear hormone receptor, ligand-binding	4	0.392927	0.424832	1447863_S_AT, 1418157_AT, 1420583_A_AT, 1416958_AT	860	49	17763	1.68609	1	0.999084	99.9883
GOTERM_MF_FAT	GO:0003707~steroid hormone receptor activity	4	0.392927	0.433231	1447863_S_AT, 1418157_AT, 1420583_A_AT, 1416958_AT	652	49	13288	1.6637	1	0.988381	99.984
INTERPRO	IPR013088:Zinc finger, NHR/GATA-type	4	0.392927	0.475976	1447863_S_AT, 1418157_AT, 1420583_A_AT, 1416958_AT	860	53	17763	1.55884	1	0.999497	99.9975
UP_SEQ_FEATURE	zinc finger region:NR C4-type	4	0.392927	0.485007	1447863_S_AT, 1418157_AT, 1420583_A_AT, 1416958_AT	905	46	16021	1.53937	1	1	99.999
UP_SEQ_FEATURE	DNA-binding region:Nuclear receptor	4	0.392927	0.485007	1447863_S_AT, 1418157_AT, 1420583_A_AT, 1416958_AT	905	46	16021	1.53937	1	1	99.999
Annotation Cluster 152	Enrichment Score: 0.3817667048643962
Category	Term	Count	%	PValue	Genes	List Total	Pop Hits	Pop Total	Fold Enrichment	Bonferroni	Benjamini	FDR
GOTERM_MF_FAT	GO:0043498~cell surface binding	3	0.294695	0.114326	1416034_AT, 1447520_AT, 1423153_X_AT	652	12	13288	5.09509	1	0.808167	84.5636
GOTERM_BP_FAT	GO:0002526~acute inflammatory response	7	0.687623	0.188107	1425546_A_AT, 1447520_AT, 1416625_AT, 1419100_AT, 1423153_X_AT, 1448499_A_AT, 1419144_AT	648	81	13588	1.81215	1	0.864912	97.4422
GOTERM_BP_FAT	GO:0002673~regulation of acute inflammatory response	3	0.294695	0.21044	1447520_AT, 1416625_AT, 1423153_X_AT	648	18	13588	3.49486	1	0.888318	98.4341
GOTERM_BP_FAT	GO:0032101~regulation of response to external stimulus	8	0.785855	0.21944	1416034_AT, 1450852_S_AT, 1428662_A_AT, 1447520_AT, 1417500_A_AT, 1416625_AT, 1417574_AT, 1423153_X_AT	648	103	13588	1.62867	1	0.896068	98.7201
GOTERM_BP_FAT	GO:0032103~positive regulation of response to external stimulus	4	0.392927	0.283604	1416034_AT, 1447520_AT, 1417500_A_AT, 1417574_AT	648	39	13588	2.15068	1	0.936027	99.717
GOTERM_BP_FAT	GO:0050727~regulation of inflammatory response	5	0.491159	0.28725	1416034_AT, 1447520_AT, 1417500_A_AT, 1416625_AT, 1423153_X_AT	648	57	13588	1.8394	1	0.93692	99.7413
GOTERM_BP_FAT	GO:0050729~positive regulation of inflammatory response	3	0.294695	0.317851	1416034_AT, 1447520_AT, 1417500_A_AT	648	24	13588	2.62114	1	0.949301	99.8804
GOTERM_BP_FAT	GO:0050778~positive regulation of immune response	8	0.785855	0.471819	1416034_AT, 1447520_AT, 1435290_X_AT, 1416625_AT, 1449130_AT, 1423153_X_AT, 1423135_AT, 1427329_A_AT	648	136	13588	1.23348	1	0.985648	99.9987
GOTERM_BP_FAT	GO:0048584~positive regulation of response to stimulus	10	0.982318	0.52886	1416034_AT, 1447520_AT, 1417500_A_AT, 1435290_X_AT, 1416625_AT, 1417574_AT, 1449130_AT, 1423153_X_AT, 1423135_AT, 1427329_A_AT	648	186	13588	1.12737	1	0.991091	99.9998
GOTERM_BP_FAT	GO:0002697~regulation of immune effector process	5	0.491159	0.608881	1416034_AT, 1447520_AT, 1416625_AT, 1449130_AT, 1423153_X_AT	648	88	13588	1.19143	1	0.995992	100
GOTERM_BP_FAT	GO:0002684~positive regulation of immune system process	10	0.982318	0.652025	1416034_AT, 1447520_AT, 1416330_AT, 1435290_X_AT, 1416625_AT, 1449130_AT, 1423153_X_AT, 1435272_AT, 1423135_AT, 1427329_A_AT	648	206	13588	1.01792	1	0.997207	100
SP_PIR_KEYWORDS	innate immunity	4	0.392927	0.742946	1416625_AT, 1449130_AT, 1423153_X_AT, 1416335_AT	911	75	17854	1.04524	1	0.987278	100
GOTERM_BP_FAT	GO:0045087~innate immune response	5	0.491159	0.756032	1447520_AT, 1416625_AT, 1449130_AT, 1423153_X_AT, 1416335_AT	648	107	13588	0.979866	1	0.99922	100
GOTERM_BP_FAT	GO:0031349~positive regulation of defense response	3	0.294695	0.762001	1416034_AT, 1447520_AT, 1417500_A_AT	648	57	13588	1.10364	1	0.999291	100
GOTERM_BP_FAT	GO:0002253~activation of immune response	4	0.392927	0.783498	1416625_AT, 1423153_X_AT, 1423135_AT, 1427329_A_AT	648	86	13588	0.975309	1	0.999509	100
SP_PIR_KEYWORDS	immune response	7	0.687623	0.912303	1422645_AT, 1435290_X_AT, 1416625_AT, 1449130_AT, 1423153_X_AT, 1416335_AT, 1417025_AT	911	184	17854	0.745585	1	0.998939	100
Annotation Cluster 153	Enrichment Score: 0.3719769175054323
Category	Term	Count	%	PValue	Genes	List Total	Pop Hits	Pop Total	Fold Enrichment	Bonferroni	Benjamini	FDR
SP_PIR_KEYWORDS	guanine-nucleotide releasing factor	8	0.785855	0.2638	1434140_AT, 1448740_AT, 1444028_S_AT, 1460578_AT, 1424470_A_AT, 1452281_AT, 1452398_AT, 1429012_AT	911	102	17854	1.53712	1	0.819631	98.7079
INTERPRO	IPR019804:Ras guanine-nucleotide exchange factor, conserved site	3	0.294695	0.324522	1424470_A_AT, 1452281_AT, 1452398_AT	860	24	17763	2.58183	1	0.996738	99.8376
SMART	SM00147:RasGEF	3	0.294695	0.344323	1424470_A_AT, 1452281_AT, 1452398_AT	397	28	9131	2.46429	1	0.959557	99.55
INTERPRO	IPR001895:Guanine-nucleotide dissociation stimulator CDC25	3	0.294695	0.395336	1424470_A_AT, 1452281_AT, 1452398_AT	860	28	17763	2.213	1	0.998827	99.9735
UP_SEQ_FEATURE	domain:Ras-GEF	3	0.294695	0.39591	1424470_A_AT, 1452281_AT, 1452398_AT	905	24	16021	2.21285	1	1	99.9839
GOTERM_MF_FAT	GO:0005085~guanyl-nucleotide exchange factor activity	8	0.785855	0.585223	1434140_AT, 1448740_AT, 1444028_S_AT, 1460578_AT, 1424470_A_AT, 1452281_AT, 1452398_AT, 1429012_AT	652	147	13288	1.10914	1	0.997354	99.9999
GOTERM_BP_FAT	GO:0051056~regulation of small GTPase mediated signal transduction	8	0.785855	0.922132	1434140_AT, 1431798_A_AT, 1460578_AT, 1424470_A_AT, 1452281_AT, 1435272_AT, 1452398_AT, 1429012_AT	648	228	13588	0.735759	1	0.999984	100
Annotation Cluster 154	Enrichment Score: 0.37070584147791946
Category	Term	Count	%	PValue	Genes	List Total	Pop Hits	Pop Total	Fold Enrichment	Bonferroni	Benjamini	FDR
GOTERM_BP_FAT	GO:0030336~negative regulation of cell migration	3	0.294695	0.387846	1437122_AT, 1425620_AT, 1423135_AT	648	28	13588	2.24669	1	0.971673	99.9822
GOTERM_BP_FAT	GO:0040013~negative regulation of locomotion	3	0.294695	0.438215	1437122_AT, 1425620_AT, 1423135_AT	648	31	13588	2.02927	1	0.981001	99.9961
GOTERM_BP_FAT	GO:0051271~negative regulation of cell motion	3	0.294695	0.454501	1437122_AT, 1425620_AT, 1423135_AT	648	32	13588	1.96586	1	0.983366	99.9977
Annotation Cluster 155	Enrichment Score: 0.3614830752243019
Category	Term	Count	%	PValue	Genes	List Total	Pop Hits	Pop Total	Fold Enrichment	Bonferroni	Benjamini	FDR
GOTERM_MF_FAT	GO:0004519~endonuclease activity	9	0.884086	0.132134	1422816_A_AT, 1421097_AT, 1430135_AT, 1422603_AT, 1428326_S_AT, 1434071_A_AT, 1431885_A_AT, 1431213_A_AT, 1438936_S_AT	652	103	13288	1.78081	1	0.831211	88.7076
GOTERM_MF_FAT	GO:0004521~endoribonuclease activity	3	0.294695	0.730639	1422603_AT, 1431213_A_AT, 1438936_S_AT	652	52	13288	1.17579	1	0.99964	100
GOTERM_MF_FAT	GO:0004540~ribonuclease activity	3	0.294695	0.852772	1422603_AT, 1431213_A_AT, 1438936_S_AT	652	68	13288	0.899134	1	0.999972	100
Annotation Cluster 156	Enrichment Score: 0.3538283988008097
Category	Term	Count	%	PValue	Genes	List Total	Pop Hits	Pop Total	Fold Enrichment	Bonferroni	Benjamini	FDR
GOTERM_BP_FAT	GO:0045664~regulation of neuron differentiation	8	0.785855	0.212518	1416034_AT, 1427100_AT, 1416967_AT, 1443260_AT, 1437122_AT, 1423135_AT, 1418517_AT, 1418571_AT	648	102	13588	1.64464	1	0.890096	98.505
GOTERM_BP_FAT	GO:0050767~regulation of neurogenesis	9	0.884086	0.293032	1416034_AT, 1427100_AT, 1416967_AT, 1443260_AT, 1437122_AT, 1423135_AT, 1418517_AT, 1427048_AT, 1418571_AT	648	132	13588	1.42971	1	0.939294	99.7758
GOTERM_BP_FAT	GO:0010769~regulation of cell morphogenesis involved in differentiation	4	0.392927	0.427844	1427100_AT, 1425620_AT, 1423135_AT, 1418571_AT	648	50	13588	1.67753	1	0.978919	99.9946
GOTERM_BP_FAT	GO:0050770~regulation of axonogenesis	3	0.294695	0.560319	1427100_AT, 1423135_AT, 1418571_AT	648	39	13588	1.61301	1	0.993511	99.9999
GOTERM_BP_FAT	GO:0010975~regulation of neuron projection development	3	0.294695	0.662283	1427100_AT, 1423135_AT, 1418571_AT	648	47	13588	1.33846	1	0.9974	100
GOTERM_BP_FAT	GO:0031344~regulation of cell projection organization	3	0.294695	0.762001	1427100_AT, 1423135_AT, 1418571_AT	648	57	13588	1.10364	1	0.999291	100
Annotation Cluster 157	Enrichment Score: 0.35133464838743844
Category	Term	Count	%	PValue	Genes	List Total	Pop Hits	Pop Total	Fold Enrichment	Bonferroni	Benjamini	FDR
UP_SEQ_FEATURE	domain:Sushi 4	3	0.294695	0.312706	1419182_AT, 1423153_X_AT, 1424221_AT	905	20	16021	2.65541	1	0.999993	99.849
UP_SEQ_FEATURE	domain:Sushi 3	3	0.294695	0.39591	1419182_AT, 1423153_X_AT, 1424221_AT	905	24	16021	2.21285	1	1	99.9839
SMART	SM00032:CCP	4	0.392927	0.405512	1419182_AT, 1423153_X_AT, 1435603_AT, 1424221_AT	397	53	9131	1.73585	1	0.966217	99.8716
SP_PIR_KEYWORDS	sushi	4	0.392927	0.418201	1419182_AT, 1423153_X_AT, 1435603_AT, 1424221_AT	911	46	17854	1.7042	1	0.909777	99.9543
INTERPRO	IPR000436:Sushi/SCR/CCP	4	0.392927	0.475976	1419182_AT, 1423153_X_AT, 1435603_AT, 1424221_AT	860	53	17763	1.55884	1	0.999497	99.9975
INTERPRO	IPR016060:Complement control module	4	0.392927	0.488436	1419182_AT, 1423153_X_AT, 1435603_AT, 1424221_AT	860	54	17763	1.52997	1	0.999594	99.9983
UP_SEQ_FEATURE	domain:Sushi 2	3	0.294695	0.562865	1419182_AT, 1423153_X_AT, 1424221_AT	905	33	16021	1.60934	1	1	99.9999
UP_SEQ_FEATURE	domain:Sushi 1	3	0.294695	0.562865	1419182_AT, 1423153_X_AT, 1424221_AT	905	33	16021	1.60934	1	1	99.9999
Annotation Cluster 158	Enrichment Score: 0.35107275402269306
Category	Term	Count	%	PValue	Genes	List Total	Pop Hits	Pop Total	Fold Enrichment	Bonferroni	Benjamini	FDR
INTERPRO	IPR011700:Basic leucine zipper	3	0.294695	0.162106	1418982_AT, 1434735_AT, 1418174_AT	860	15	17763	4.13093	1	0.966759	94.472
SMART	SM00338:BRLZ	4	0.392927	0.417265	1418982_AT, 1434735_AT, 1418174_AT, 1435828_AT	397	54	9131	1.7037	1	0.964125	99.9006
INTERPRO	IPR004827:Basic-leucine zipper (bZIP) transcription factor	4	0.392927	0.488436	1418982_AT, 1434735_AT, 1418174_AT, 1435828_AT	860	54	17763	1.52997	1	0.999594	99.9983
UP_SEQ_FEATURE	domain:Leucine-zipper	7	0.687623	0.565703	1426690_A_AT, 1418982_AT, 1434735_AT, 1418174_AT, 1420772_A_AT, 1435828_AT, 1437914_AT	905	107	16021	1.15812	1	1	99.9999
UP_SEQ_FEATURE	DNA-binding region:Basic motif	6	0.589391	0.939787	1426690_A_AT, 1418982_AT, 1434735_AT, 1418174_AT, 1435436_AT, 1435828_AT	905	154	16021	0.689718	1	1	100
Annotation Cluster 159	Enrichment Score: 0.34525252961425845
Category	Term	Count	%	PValue	Genes	List Total	Pop Hits	Pop Total	Fold Enrichment	Bonferroni	Benjamini	FDR
GOTERM_MF_FAT	GO:0016859~cis-trans isomerase activity	4	0.392927	0.271348	1416498_AT, 1427552_A_AT, 1416803_AT, 1423677_AT	652	37	13288	2.20328	1	0.953817	99.2341
GOTERM_MF_FAT	GO:0003755~peptidyl-prolyl cis-trans isomerase activity	3	0.294695	0.517129	1416498_AT, 1416803_AT, 1423677_AT	652	35	13288	1.74689	1	0.994291	99.9986
SP_PIR_KEYWORDS	Rotamase	3	0.294695	0.522996	1416498_AT, 1416803_AT, 1423677_AT	911	34	17854	1.72926	1	0.94721	99.9973
GOTERM_BP_FAT	GO:0006457~protein folding	7	0.687623	0.566716	1416498_AT, 1424829_AT, 1418591_AT, 1418986_A_AT, 1416803_AT, 1428308_AT, 1423677_AT	648	127	13588	1.15578	1	0.993836	100
Annotation Cluster 160	Enrichment Score: 0.33317012835940635
Category	Term	Count	%	PValue	Genes	List Total	Pop Hits	Pop Total	Fold Enrichment	Bonferroni	Benjamini	FDR
SMART	SM00651:Sm	4	0.392927	0.040701	1416336_S_AT, 1419260_A_AT, 1421063_S_AT, 1428672_AT	397	18	9131	5.11111	0.999923	0.650992	41.2557
INTERPRO	IPR006649:Like-Sm ribonucleoprotein, eukaryotic and archaea-type, core	4	0.392927	0.0534786	1416336_S_AT, 1419260_A_AT, 1421063_S_AT, 1428672_AT	860	18	17763	4.58992	1	0.816845	59.3329
INTERPRO	IPR001163:Like-Sm ribonucleoprotein, core	4	0.392927	0.0612998	1416336_S_AT, 1419260_A_AT, 1421063_S_AT, 1428672_AT	860	19	17763	4.34835	1	0.826255	64.4981
KEGG_PATHWAY	mmu03040:Spliceosome	5	0.491159	0.875227	1416336_S_AT, 1427126_AT, 1419260_A_AT, 1452388_AT, 1437972_S_AT, 1428672_AT	288	124	5738	0.803371	1	0.985231	100
SP_PIR_KEYWORDS	Spliceosome	4	0.392927	0.926732	1416336_S_AT, 1419260_A_AT, 1437972_S_AT, 1428672_AT	911	111	17854	0.706243	1	0.99933	100
GOTERM_CC_FAT	GO:0005681~spliceosome	4	0.392927	0.968095	1416336_S_AT, 1419260_A_AT, 1437972_S_AT, 1428672_AT	681	124	12504	0.592298	1	0.999927	100
GOTERM_BP_FAT	GO:0008380~RNA splicing	5	0.491159	0.987893	1429735_AT, 1416336_S_AT, 1419260_A_AT, 1437972_S_AT, 1428672_AT	648	201	13588	0.52162	1	1	100
SP_PIR_KEYWORDS	mrna splicing	5	0.491159	0.989284	1429735_AT, 1416336_S_AT, 1419260_A_AT, 1437972_S_AT, 1428672_AT	911	191	17854	0.513043	1	0.999986	100
GOTERM_BP_FAT	GO:0016071~mRNA metabolic process	8	0.785855	0.990685	1429735_AT, 1416336_S_AT, 1417960_AT, 1419260_A_AT, 1422528_A_AT, 1437972_S_AT, 1420776_A_AT, 1428672_AT	648	302	13588	0.555474	1	1	100
SP_PIR_KEYWORDS	mrna processing	6	0.589391	0.994685	1429735_AT, 1416336_S_AT, 1417960_AT, 1419260_A_AT, 1437972_S_AT, 1428672_AT	911	240	17854	0.489956	1	0.999996	100
GOTERM_BP_FAT	GO:0006397~mRNA processing	6	0.589391	0.995588	1429735_AT, 1416336_S_AT, 1417960_AT, 1419260_A_AT, 1437972_S_AT, 1428672_AT	648	262	13588	0.480209	1	1	100
GOTERM_BP_FAT	GO:0006396~RNA processing	7	0.687623	0.999977	1429735_AT, 1416336_S_AT, 1417960_AT, 1419260_A_AT, 1437972_S_AT, 1428672_AT, 1438391_X_AT	648	437	13588	0.33589	1	1	100
Annotation Cluster 161	Enrichment Score: 0.3330145218958687
Category	Term	Count	%	PValue	Genes	List Total	Pop Hits	Pop Total	Fold Enrichment	Bonferroni	Benjamini	FDR
GOTERM_BP_FAT	GO:0051129~negative regulation of cellular component organization	9	0.884086	0.075138	1455213_AT, 1433742_AT, 1425991_A_AT, 1415812_AT, 1416995_AT, 1425620_AT, 1423135_AT, 1427918_A_AT, 1416840_AT	648	93	13588	2.02927	1	0.69614	74.6945
GOTERM_BP_FAT	GO:0051494~negative regulation of cytoskeleton organization	5	0.491159	0.193826	1455213_AT, 1433742_AT, 1425991_A_AT, 1415812_AT, 1416840_AT	648	48	13588	2.18428	1	0.869665	97.7413
GOTERM_BP_FAT	GO:0030837~negative regulation of actin filament polymerization	3	0.294695	0.335585	1455213_AT, 1433742_AT, 1415812_AT	648	25	13588	2.5163	1	0.955731	99.9248
GOTERM_BP_FAT	GO:0010639~negative regulation of organelle organization	5	0.491159	0.341692	1455213_AT, 1433742_AT, 1425991_A_AT, 1415812_AT, 1416840_AT	648	62	13588	1.69106	1	0.957916	99.9361
GOTERM_BP_FAT	GO:0031333~negative regulation of protein complex assembly	3	0.294695	0.370608	1455213_AT, 1433742_AT, 1415812_AT	648	27	13588	2.3299	1	0.96706	99.971
GOTERM_BP_FAT	GO:0032272~negative regulation of protein polymerization	3	0.294695	0.370608	1455213_AT, 1433742_AT, 1415812_AT	648	27	13588	2.3299	1	0.96706	99.971
GOTERM_BP_FAT	GO:0051493~regulation of cytoskeleton organization	6	0.589391	0.511643	1455213_AT, 1435649_AT, 1433742_AT, 1425991_A_AT, 1415812_AT, 1416840_AT	648	99	13588	1.27086	1	0.989724	99.9997
GOTERM_BP_FAT	GO:0032956~regulation of actin cytoskeleton organization	4	0.392927	0.549343	1455213_AT, 1433742_AT, 1425991_A_AT, 1415812_AT	648	60	13588	1.39794	1	0.992727	99.9999
GOTERM_BP_FAT	GO:0032970~regulation of actin filament-based process	4	0.392927	0.56065	1455213_AT, 1433742_AT, 1425991_A_AT, 1415812_AT	648	61	13588	1.37503	1	0.993458	99.9999
GOTERM_BP_FAT	GO:0043254~regulation of protein complex assembly	4	0.392927	0.604113	1416034_AT, 1455213_AT, 1433742_AT, 1415812_AT	648	65	13588	1.29041	1	0.995808	100
GOTERM_BP_FAT	GO:0044087~regulation of cellular component biogenesis	5	0.491159	0.617829	1416034_AT, 1455213_AT, 1433742_AT, 1425991_A_AT, 1415812_AT	648	89	13588	1.17804	1	0.996307	100
GOTERM_BP_FAT	GO:0030833~regulation of actin filament polymerization	3	0.294695	0.638713	1455213_AT, 1433742_AT, 1415812_AT	648	45	13588	1.39794	1	0.996944	100
GOTERM_BP_FAT	GO:0008064~regulation of actin polymerization or depolymerization	3	0.294695	0.695299	1455213_AT, 1433742_AT, 1415812_AT	648	50	13588	1.25815	1	0.998293	100
GOTERM_BP_FAT	GO:0030832~regulation of actin filament length	3	0.294695	0.705695	1455213_AT, 1433742_AT, 1415812_AT	648	51	13588	1.23348	1	0.998542	100
GOTERM_BP_FAT	GO:0032271~regulation of protein polymerization	3	0.294695	0.762001	1455213_AT, 1433742_AT, 1415812_AT	648	57	13588	1.10364	1	0.999291	100
GOTERM_BP_FAT	GO:0032535~regulation of cellular component size	7	0.687623	0.784562	1455213_AT, 1416330_AT, 1415923_AT, 1433742_AT, 1415812_AT, 1437122_AT, 1418571_AT	648	161	13588	0.911702	1	0.999514	100
GOTERM_BP_FAT	GO:0033043~regulation of organelle organization	6	0.589391	0.863071	1455213_AT, 1435649_AT, 1433742_AT, 1425991_A_AT, 1415812_AT, 1416840_AT	648	154	13588	0.816979	1	0.999892	100
Annotation Cluster 162	Enrichment Score: 0.3219702452590202
Category	Term	Count	%	PValue	Genes	List Total	Pop Hits	Pop Total	Fold Enrichment	Bonferroni	Benjamini	FDR
SMART	SM00064:FYVE	3	0.294695	0.376049	1427177_AT, 1460578_AT, 1424671_AT	397	30	9131	2.3	1	0.965291	99.7615
INTERPRO	IPR000306:Zinc finger, FYVE-type	3	0.294695	0.42947	1427177_AT, 1460578_AT, 1424671_AT	860	30	17763	2.06547	1	0.999116	99.9898
INTERPRO	IPR017455:Zinc finger, FYVE-related	3	0.294695	0.509993	1427177_AT, 1460578_AT, 1424671_AT	860	35	17763	1.7704	1	0.999716	99.9992
UP_SEQ_FEATURE	zinc finger region:FYVE-type	3	0.294695	0.625716	1427177_AT, 1460578_AT, 1424671_AT	905	37	16021	1.43536	1	1	100
Annotation Cluster 163	Enrichment Score: 0.3200041740304228
Category	Term	Count	%	PValue	Genes	List Total	Pop Hits	Pop Total	Fold Enrichment	Bonferroni	Benjamini	FDR
GOTERM_CC_FAT	GO:0014069~postsynaptic density	6	0.589391	0.142438	1425338_AT, 1417960_AT, 1442823_AT, 1419137_AT, 1456609_AT, 1424367_A_AT	681	51	12504	2.16015	1	0.640664	88.0145
SP_PIR_KEYWORDS	cell junction	23	2.25933	0.349807	1421287_A_AT, 1455610_AT, 1434180_AT, 1435649_AT, 1420514_AT, 1424408_AT, 1442823_AT, 1417644_AT, 1434621_AT, 1415800_AT, 1424842_A_AT, 1421862_A_AT, 1417960_AT, 1449041_A_AT, 1418136_AT, 1416271_AT, 1419137_AT, 1427773_A_AT, 1460356_AT, 1416825_AT, 1451499_AT, 1456609_AT, 1424367_A_AT	911	392	17854	1.1499	1	0.868842	99.7786
GOTERM_CC_FAT	GO:0045211~postsynaptic membrane	9	0.884086	0.378455	1450852_S_AT, 1417960_AT, 1442823_AT, 1417644_AT, 1419137_AT, 1451499_AT, 1416825_AT, 1456609_AT, 1424367_A_AT	681	126	12504	1.31152	1	0.900104	99.8592
GOTERM_CC_FAT	GO:0030054~cell junction	27	2.65226	0.506929	1455610_AT, 1417307_AT, 1452387_A_AT, 1442823_AT, 1417644_AT, 1434621_AT, 1424842_A_AT, 1421862_A_AT, 1451499_AT, 1424367_A_AT, 1434180_AT, 1435649_AT, 1420514_AT, 1424408_AT, 1455056_AT, 1428650_AT, 1415800_AT, 1417960_AT, 1422444_AT, 1418136_AT, 1449041_A_AT, 1416271_AT, 1419137_AT, 1427773_A_AT, 1460356_AT, 1416825_AT, 1456609_AT	681	470	12504	1.05479	1	0.953432	99.9942
GOTERM_CC_FAT	GO:0044456~synapse part	12	1.17878	0.607845	1425338_AT, 1450852_S_AT, 1417960_AT, 1417081_A_AT, 1442823_AT, 1417644_AT, 1419137_AT, 1427773_A_AT, 1451499_AT, 1416825_AT, 1456609_AT, 1424367_A_AT	681	212	12504	1.03932	1	0.970605	99.9998
SP_PIR_KEYWORDS	postsynaptic cell membrane	6	0.589391	0.665958	1417960_AT, 1442823_AT, 1417644_AT, 1419137_AT, 1456609_AT, 1424367_A_AT	911	110	17854	1.069	1	0.977442	100
GOTERM_CC_FAT	GO:0045202~synapse	15	1.47348	0.831801	1425338_AT, 1417307_AT, 1442823_AT, 1417644_AT, 1450852_S_AT, 1416114_AT, 1421862_A_AT, 1417960_AT, 1417081_A_AT, 1427773_A_AT, 1419137_AT, 1416825_AT, 1451499_AT, 1424367_A_AT, 1456609_AT	681	319	12504	0.863381	1	0.997497	100
SP_PIR_KEYWORDS	synapse	9	0.884086	0.855642	1421862_A_AT, 1417960_AT, 1442823_AT, 1417644_AT, 1419137_AT, 1427773_A_AT, 1451499_AT, 1456609_AT, 1424367_A_AT	911	213	17854	0.828095	1	0.996875	100
Annotation Cluster 164	Enrichment Score: 0.3184320891118036
Category	Term	Count	%	PValue	Genes	List Total	Pop Hits	Pop Total	Fold Enrichment	Bonferroni	Benjamini	FDR
GOTERM_BP_FAT	GO:0043368~positive T cell selection	3	0.294695	0.0790589	1449130_AT, 1435272_AT, 1437122_AT	648	10	13588	6.29074	1	0.701976	76.5169
GOTERM_BP_FAT	GO:0045058~T cell selection	3	0.294695	0.264126	1449130_AT, 1435272_AT, 1437122_AT	648	21	13588	2.99559	1	0.924936	99.5463
GOTERM_BP_FAT	GO:0046635~positive regulation of alpha-beta T cell activation	3	0.294695	0.35318	1416034_AT, 1449130_AT, 1435272_AT	648	26	13588	2.41952	1	0.961649	99.9531
GOTERM_BP_FAT	GO:0033077~T cell differentiation in the thymus	3	0.294695	0.454501	1449130_AT, 1435272_AT, 1437122_AT	648	32	13588	1.96586	1	0.983366	99.9977
GOTERM_BP_FAT	GO:0046634~regulation of alpha-beta T cell activation	3	0.294695	0.486239	1416034_AT, 1449130_AT, 1435272_AT	648	34	13588	1.85022	1	0.987624	99.9992
GOTERM_BP_FAT	GO:0030217~T cell differentiation	5	0.491159	0.492311	1453851_A_AT, 1419155_A_AT, 1449130_AT, 1435272_AT, 1437122_AT	648	76	13588	1.37955	1	0.987997	99.9993
GOTERM_BP_FAT	GO:0030098~lymphocyte differentiation	6	0.589391	0.637672	1453851_A_AT, 1416034_AT, 1419155_A_AT, 1449130_AT, 1435272_AT, 1437122_AT	648	114	13588	1.10364	1	0.996976	100
GOTERM_BP_FAT	GO:0042110~T cell activation	6	0.589391	0.652883	1453851_A_AT, 1419155_A_AT, 1417574_AT, 1449130_AT, 1435272_AT, 1437122_AT	648	116	13588	1.08461	1	0.99717	100
GOTERM_BP_FAT	GO:0002521~leukocyte differentiation	7	0.687623	0.67491	1453851_A_AT, 1416034_AT, 1419155_A_AT, 1449130_AT, 1418982_AT, 1435272_AT, 1437122_AT	648	142	13588	1.03369	1	0.997771	100
GOTERM_BP_FAT	GO:0045321~leukocyte activation	9	0.884086	0.824594	1453851_A_AT, 1416034_AT, 1447520_AT, 1419155_A_AT, 1417574_AT, 1449130_AT, 1435272_AT, 1437122_AT, 1420760_S_AT	648	219	13588	0.861745	1	0.999766	100
GOTERM_BP_FAT	GO:0046649~lymphocyte activation	7	0.687623	0.897313	1453851_A_AT, 1416034_AT, 1419155_A_AT, 1417574_AT, 1449130_AT, 1435272_AT, 1437122_AT	648	191	13588	0.768502	1	0.999957	100
GOTERM_BP_FAT	GO:0001775~cell activation	9	0.884086	0.904835	1453851_A_AT, 1416034_AT, 1447520_AT, 1419155_A_AT, 1417574_AT, 1449130_AT, 1435272_AT, 1437122_AT, 1420760_S_AT	648	246	13588	0.767164	1	0.999968	100
Annotation Cluster 165	Enrichment Score: 0.3174611801634735
Category	Term	Count	%	PValue	Genes	List Total	Pop Hits	Pop Total	Fold Enrichment	Bonferroni	Benjamini	FDR
INTERPRO	IPR000886:Endoplasmic reticulum, targeting sequence	4	0.392927	0.345309	1450843_A_AT, 1424382_AT, 1416803_AT, 1423677_AT	860	43	17763	1.92136	1	0.997789	99.9026
UP_SEQ_FEATURE	calcium-binding region:2	8	0.785855	0.427901	1427483_AT, 1448321_AT, 1424382_AT, 1428440_AT, 1416803_AT, 1448507_AT, 1423677_AT, 1423155_AT	905	110	16021	1.28747	1	1	99.9937
GOTERM_CC_FAT	GO:0005788~endoplasmic reticulum lumen	5	0.491159	0.555484	1436867_AT, 1450843_A_AT, 1424382_AT, 1416803_AT, 1423677_AT	681	72	12504	1.27509	1	0.96264	99.9986
UP_SEQ_FEATURE	short sequence motif:Prevents secretion from ER	4	0.392927	0.654534	1450843_A_AT, 1424382_AT, 1416803_AT, 1423677_AT	905	59	16021	1.20019	1	1	100
Annotation Cluster 166	Enrichment Score: 0.3045164926813317
Category	Term	Count	%	PValue	Genes	List Total	Pop Hits	Pop Total	Fold Enrichment	Bonferroni	Benjamini	FDR
GOTERM_CC_FAT	GO:0031300~intrinsic to organelle membrane	8	0.785855	0.408685	1422904_AT, 1417403_AT, 1418074_AT, 1428636_AT, 1422470_AT, 1438566_AT, 1420632_A_AT, 1417429_AT	681	112	12504	1.31152	1	0.916317	99.9293
GOTERM_CC_FAT	GO:0031228~intrinsic to Golgi membrane	3	0.294695	0.525748	1418074_AT, 1428636_AT, 1438566_AT	681	32	12504	1.72137	1	0.957663	99.9966
GOTERM_CC_FAT	GO:0030173~integral to Golgi membrane	3	0.294695	0.525748	1418074_AT, 1428636_AT, 1438566_AT	681	32	12504	1.72137	1	0.957663	99.9966
GOTERM_CC_FAT	GO:0031301~integral to organelle membrane	6	0.589391	0.535784	1417403_AT, 1418074_AT, 1428636_AT, 1422470_AT, 1438566_AT, 1420632_A_AT	681	89	12504	1.23784	1	0.958434	99.9975
Annotation Cluster 167	Enrichment Score: 0.2995854943382395
Category	Term	Count	%	PValue	Genes	List Total	Pop Hits	Pop Total	Fold Enrichment	Bonferroni	Benjamini	FDR
SP_PIR_KEYWORDS	iron transport	3	0.294695	0.27147	1425546_A_AT, 1428636_AT, 1448696_AT	911	20	17854	2.93974	1	0.826177	98.8865
GOTERM_BP_FAT	GO:0006826~iron ion transport	3	0.294695	0.454501	1425546_A_AT, 1428636_AT, 1448696_AT	648	32	13588	1.96586	1	0.983366	99.9977
GOTERM_BP_FAT	GO:0000041~transition metal ion transport	4	0.392927	0.654295	1425546_A_AT, 1441850_X_AT, 1428636_AT, 1448696_AT	648	70	13588	1.19824	1	0.997159	100
GOTERM_BP_FAT	GO:0015674~di-, tri-valent inorganic cation transport	7	0.687623	0.784562	1425546_A_AT, 1450852_S_AT, 1441850_X_AT, 1424308_AT, 1428636_AT, 1448696_AT, 1423155_AT	648	161	13588	0.911702	1	0.999514	100
Annotation Cluster 168	Enrichment Score: 0.27509841990385536
Category	Term	Count	%	PValue	Genes	List Total	Pop Hits	Pop Total	Fold Enrichment	Bonferroni	Benjamini	FDR
GOTERM_BP_FAT	GO:0002089~lens morphogenesis in camera-type eye	3	0.294695	0.108979	1416967_AT, 1443260_AT, 1422912_AT	648	12	13588	5.24228	1	0.772775	86.8655
GOTERM_BP_FAT	GO:0048593~camera-type eye morphogenesis	5	0.491159	0.193826	1416967_AT, 1416468_AT, 1443260_AT, 1423135_AT, 1422912_AT	648	48	13588	2.18428	1	0.869665	97.7413
GOTERM_BP_FAT	GO:0002088~lens development in camera-type eye	4	0.392927	0.218896	1416967_AT, 1443260_AT, 1435828_AT, 1422912_AT	648	34	13588	2.46696	1	0.896289	98.7043
GOTERM_BP_FAT	GO:0043010~camera-type eye development	8	0.785855	0.425021	1416967_AT, 1416468_AT, 1443260_AT, 1416455_A_AT, 1437745_AT, 1423135_AT, 1435828_AT, 1422912_AT	648	130	13588	1.29041	1	0.978659	99.9941
GOTERM_BP_FAT	GO:0048592~eye morphogenesis	5	0.491159	0.460926	1416967_AT, 1416468_AT, 1443260_AT, 1423135_AT, 1422912_AT	648	73	13588	1.43624	1	0.984289	99.9981
GOTERM_BP_FAT	GO:0001654~eye development	8	0.785855	0.624635	1416967_AT, 1416468_AT, 1443260_AT, 1416455_A_AT, 1437745_AT, 1423135_AT, 1435828_AT, 1422912_AT	648	157	13588	1.06849	1	0.996583	100
GOTERM_BP_FAT	GO:0042472~inner ear morphogenesis	3	0.294695	0.835163	1448979_AT, 1416967_AT, 1437745_AT	648	67	13588	0.938917	1	0.999814	100
GOTERM_BP_FAT	GO:0007423~sensory organ development	10	0.982318	0.868504	1448979_AT, 1416967_AT, 1416468_AT, 1443260_AT, 1416455_A_AT, 1437122_AT, 1437745_AT, 1423135_AT, 1435828_AT, 1422912_AT	648	257	13588	0.81592	1	0.999902	100
GOTERM_BP_FAT	GO:0043583~ear development	4	0.392927	0.87837	1448979_AT, 1416967_AT, 1437122_AT, 1437745_AT	648	104	13588	0.806505	1	0.999924	100
GOTERM_BP_FAT	GO:0042471~ear morphogenesis	3	0.294695	0.882948	1448979_AT, 1416967_AT, 1437745_AT	648	76	13588	0.827729	1	0.999935	100
GOTERM_BP_FAT	GO:0048839~inner ear development	3	0.294695	0.92687	1448979_AT, 1416967_AT, 1437745_AT	648	88	13588	0.714857	1	0.999987	100
GOTERM_BP_FAT	GO:0048568~embryonic organ development	8	0.785855	0.944764	1448979_AT, 1416967_AT, 1416468_AT, 1418982_AT, 1437745_AT, 1435436_AT, 1423785_AT, 1422912_AT	648	241	13588	0.696071	1	0.999995	100
GOTERM_BP_FAT	GO:0048562~embryonic organ morphogenesis	5	0.491159	0.951835	1448979_AT, 1416967_AT, 1416468_AT, 1437745_AT, 1422912_AT	648	161	13588	0.651215	1	0.999997	100
Annotation Cluster 169	Enrichment Score: 0.2540043273314072
Category	Term	Count	%	PValue	Genes	List Total	Pop Hits	Pop Total	Fold Enrichment	Bonferroni	Benjamini	FDR
SMART	SM00645:Pept_C1	3	0.294695	0.263211	1417109_AT, 1451019_AT, 1418365_AT	397	23	9131	3	1	0.931341	97.9971
INTERPRO	IPR000668:Peptidase C1A, papain C-terminal	3	0.294695	0.306434	1417109_AT, 1451019_AT, 1418365_AT	860	23	17763	2.69408	1	0.99548	99.7497
INTERPRO	IPR013128:Peptidase C1A, papain	3	0.294695	0.377917	1417109_AT, 1451019_AT, 1418365_AT	860	27	17763	2.29496	1	0.998593	99.9578
INTERPRO	IPR000169:Peptidase, cysteine peptidase active site	3	0.294695	0.681858	1417109_AT, 1451019_AT, 1418365_AT	860	48	17763	1.29092	1	0.999989	100
GOTERM_MF_FAT	GO:0004197~cysteine-type endopeptidase activity	3	0.294695	0.821402	1417109_AT, 1451019_AT, 1418365_AT	652	63	13288	0.970494	1	0.999925	100
GOTERM_MF_FAT	GO:0008234~cysteine-type peptidase activity	4	0.392927	0.976624	1417168_A_AT, 1417109_AT, 1451019_AT, 1418365_AT	652	146	13288	0.558366	1	1	100
GOTERM_MF_FAT	GO:0004175~endopeptidase activity	8	0.785855	0.999897	1450716_AT, 1419292_AT, 1417109_AT, 1451019_AT, 1416749_AT, 1422597_AT, 1426981_AT, 1418365_AT	652	421	13288	0.387275	1	1	100
Annotation Cluster 170	Enrichment Score: 0.2514606479204754
Category	Term	Count	%	PValue	Genes	List Total	Pop Hits	Pop Total	Fold Enrichment	Bonferroni	Benjamini	FDR
GOTERM_MF_FAT	GO:0017016~Ras GTPase binding	4	0.392927	0.533913	1448740_AT, 1426743_AT, 1444028_S_AT, 1421594_A_AT	652	57	13288	1.4302	1	0.995127	99.9992
GOTERM_MF_FAT	GO:0031267~small GTPase binding	4	0.392927	0.557479	1448740_AT, 1426743_AT, 1444028_S_AT, 1421594_A_AT	652	59	13288	1.38172	1	0.996439	99.9996
GOTERM_MF_FAT	GO:0051020~GTPase binding	4	0.392927	0.591451	1448740_AT, 1426743_AT, 1444028_S_AT, 1421594_A_AT	652	62	13288	1.31486	1	0.997489	99.9999
Annotation Cluster 171	Enrichment Score: 0.24888567523653254
Category	Term	Count	%	PValue	Genes	List Total	Pop Hits	Pop Total	Fold Enrichment	Bonferroni	Benjamini	FDR
GOTERM_CC_FAT	GO:0043232~intracellular non-membrane-bounded organelle	107	10.5108	0.444317	1415681_AT, 1424826_S_AT, 1418716_AT, 1442823_AT, 1448699_AT, 1431885_A_AT, 1455095_AT, 1425189_A_AT, 1433878_AT, 1422451_AT, 1438018_AT, 1418003_AT, 1425338_AT, 1429453_A_AT, 1426640_S_AT, 1417168_A_AT, 1418986_A_AT, 1415812_AT, 1416454_S_AT, 1416759_AT, 1417960_AT, 1460578_AT, 1416948_AT, 1460694_S_AT, 1438936_S_AT, 1448869_A_AT, 1416284_AT, 1434277_A_AT, 1455610_AT, 1443915_AT, 1423492_AT, 141…	681	1919	12504	1.02379	1	0.928672	99.97
GOTERM_CC_FAT	GO:0043228~non-membrane-bounded organelle	107	10.5108	0.444317	1415681_AT, 1424826_S_AT, 1418716_AT, 1442823_AT, 1448699_AT, 1431885_A_AT, 1455095_AT, 1425189_A_AT, 1433878_AT, 1422451_AT, 1438018_AT, 1418003_AT, 1425338_AT, 1429453_A_AT, 1426640_S_AT, 1417168_A_AT, 1418986_A_AT, 1415812_AT, 1416454_S_AT, 1416759_AT, 1417960_AT, 1460578_AT, 1416948_AT, 1460694_S_AT, 1438936_S_AT, 1448869_A_AT, 1416284_AT, 1434277_A_AT, 1455610_AT, 1443915_AT, 1423492_AT, 141…	681	1919	12504	1.02379	1	0.928672	99.97
GOTERM_CC_FAT	GO:0005856~cytoskeleton	53	5.20629	0.907731	1424826_S_AT, 1418658_AT, 1442823_AT, 1448371_AT, 1424376_AT, 1424842_A_AT, 1435551_AT, 1449000_AT, 1448643_AT, 1438018_AT, 1418003_AT, 1442376_AT, 1425338_AT, 1417168_A_AT, 1415923_AT, 1426640_S_AT, 1435649_AT, 1418986_A_AT, 1418209_A_AT, 1415812_AT, 1416454_S_AT, 1416759_AT, 1417960_AT, 1460578_AT, 1460694_S_AT, 1457465_AT, 1417788_AT, 1416825_AT, 1455610_AT, 1417307_AT, 1424092_AT, 1455450_AT,…	681	1122	12504	0.867331	1	0.99943	100
Annotation Cluster 172	Enrichment Score: 0.24347019793462898
Category	Term	Count	%	PValue	Genes	List Total	Pop Hits	Pop Total	Fold Enrichment	Bonferroni	Benjamini	FDR
GOTERM_BP_FAT	GO:0042401~biogenic amine biosynthetic process	3	0.294695	0.404872	1447863_S_AT, 1421260_A_AT, 1455435_S_AT	648	29	13588	2.16922	1	0.974806	99.9892
GOTERM_BP_FAT	GO:0042398~cellular amino acid derivative biosynthetic process	3	0.294695	0.673597	1447863_S_AT, 1421260_A_AT, 1455435_S_AT	648	48	13588	1.31057	1	0.997752	100
GOTERM_BP_FAT	GO:0009309~amine biosynthetic process	4	0.392927	0.682137	1447863_S_AT, 1417629_AT, 1421260_A_AT, 1455435_S_AT	648	73	13588	1.14899	1	0.997944	100
Annotation Cluster 173	Enrichment Score: 0.232769130906989
Category	Term	Count	%	PValue	Genes	List Total	Pop Hits	Pop Total	Fold Enrichment	Bonferroni	Benjamini	FDR
GOTERM_BP_FAT	GO:0035239~tube morphogenesis	11	1.08055	0.297738	1417271_A_AT, 1434917_AT, 1417500_A_AT, 1417574_AT, 1419519_AT, 1433891_AT, 1437122_AT, 1419137_AT, 1428853_AT, 1422912_AT, 1415800_AT	648	171	13588	1.34889	1	0.940295	99.8007
GOTERM_BP_FAT	GO:0035272~exocrine system development	4	0.392927	0.309984	1420696_AT, 1417500_A_AT, 1419155_A_AT, 1419519_AT	648	41	13588	2.04577	1	0.945582	99.8537
GOTERM_BP_FAT	GO:0022612~gland morphogenesis	6	0.589391	0.371035	1420696_AT, 1417500_A_AT, 1419519_AT, 1437122_AT, 1428853_AT, 1422912_AT	648	84	13588	1.4978	1	0.966885	99.9713
GOTERM_BP_FAT	GO:0002009~morphogenesis of an epithelium	10	0.982318	0.441526	1420696_AT, 1434917_AT, 1448752_AT, 1419519_AT, 1418136_AT, 1416468_AT, 1437122_AT, 1419137_AT, 1428853_AT, 1422912_AT	648	173	13588	1.21209	1	0.981343	99.9965
GOTERM_BP_FAT	GO:0048729~tissue morphogenesis	13	1.27701	0.462549	1437122_AT, 1425620_AT, 1428853_AT, 1423785_AT, 1422912_AT, 1420696_AT, 1434917_AT, 1448752_AT, 1418136_AT, 1419519_AT, 1416468_AT, 1419137_AT, 1423389_AT	648	238	13588	1.14537	1	0.984427	99.9982
GOTERM_BP_FAT	GO:0016331~morphogenesis of embryonic epithelium	5	0.491159	0.512805	1434917_AT, 1418136_AT, 1416468_AT, 1419137_AT, 1428853_AT	648	78	13588	1.34418	1	0.989634	99.9997
GOTERM_BP_FAT	GO:0035148~tube lumen formation	4	0.392927	0.537867	1434917_AT, 1417500_A_AT, 1419137_AT, 1428853_AT	648	59	13588	1.42164	1	0.991809	99.9999
GOTERM_BP_FAT	GO:0001763~morphogenesis of a branching structure	7	0.687623	0.551033	1420696_AT, 1417271_A_AT, 1417500_A_AT, 1417574_AT, 1419519_AT, 1437122_AT, 1422912_AT	648	125	13588	1.17427	1	0.992804	99.9999
GOTERM_BP_FAT	GO:0060429~epithelium development	13	1.27701	0.643775	1437122_AT, 1428853_AT, 1422912_AT, 1415800_AT, 1420696_AT, 1434917_AT, 1448752_AT, 1418136_AT, 1419519_AT, 1416468_AT, 1425895_A_AT, 1416630_AT, 1419137_AT	648	271	13588	1.0059	1	0.997101	100
GOTERM_BP_FAT	GO:0048754~branching morphogenesis of a tube	5	0.491159	0.652316	1417271_A_AT, 1417574_AT, 1419519_AT, 1437122_AT, 1422912_AT	648	93	13588	1.12737	1	0.997183	100
GOTERM_BP_FAT	GO:0048732~gland development	9	0.884086	0.726793	1420696_AT, 1417500_A_AT, 1416006_AT, 1416967_AT, 1419519_AT, 1437122_AT, 1428853_AT, 1422912_AT, 1423104_AT	648	197	13588	0.957981	1	0.998813	100
GOTERM_BP_FAT	GO:0001838~embryonic epithelial tube formation	3	0.294695	0.73512	1434917_AT, 1419137_AT, 1428853_AT	648	54	13588	1.16495	1	0.998974	100
GOTERM_BP_FAT	GO:0060562~epithelial tube morphogenesis	5	0.491159	0.780845	1434917_AT, 1437122_AT, 1419137_AT, 1428853_AT, 1422912_AT	648	111	13588	0.944556	1	0.999487	100
GOTERM_BP_FAT	GO:0030879~mammary gland development	4	0.392927	0.783498	1419519_AT, 1428853_AT, 1422912_AT, 1423104_AT	648	86	13588	0.975309	1	0.999509	100
GOTERM_BP_FAT	GO:0003006~reproductive developmental process	11	1.08055	0.813028	1450716_AT, 1457218_AT, 1417574_AT, 1416967_AT, 1419519_AT, 1433891_AT, 1437122_AT, 1437745_AT, 1422627_A_AT, 1438018_AT, 1422912_AT	648	264	13588	0.873714	1	0.999702	100
GOTERM_BP_FAT	GO:0048608~reproductive structure development	4	0.392927	0.950658	1450716_AT, 1419519_AT, 1437122_AT, 1422912_AT	648	130	13588	0.645204	1	0.999997	100
GOTERM_BP_FAT	GO:0048598~embryonic morphogenesis	11	1.08055	0.978867	1448979_AT, 1429514_AT, 1434917_AT, 1416967_AT, 1418136_AT, 1416468_AT, 1437745_AT, 1418013_AT, 1419137_AT, 1428853_AT, 1422912_AT	648	359	13588	0.642508	1	1	100
Annotation Cluster 174	Enrichment Score: 0.23068872119541467
Category	Term	Count	%	PValue	Genes	List Total	Pop Hits	Pop Total	Fold Enrichment	Bonferroni	Benjamini	FDR
SP_PIR_KEYWORDS	membrane	307	30.1572	0.0344985	1433776_AT, 1421225_A_AT, 1417590_AT, 1416203_AT, 1442823_AT, 1433891_AT, 1417185_AT, 1416778_AT, 1424562_A_AT, 1425582_A_AT, 1422645_AT, 1417962_S_AT, 1421374_A_AT, 1434210_S_AT, 1417275_AT, 1417481_AT, 1418912_AT, 1417580_S_AT, 1417070_AT, 1415993_AT, 1425914_A_AT, 1416357_A_AT, 1451665_A_AT, 1454654_AT, 1422780_AT, 1433615_AT, 1417635_AT, 1449038_AT, 1452398_AT, 1417053_AT, 1438426_AT, 1454862…	911	5507	17854	1.09255	1	0.33488	39.2585
UP_SEQ_FEATURE	transmembrane region	226	22.2004	0.722553	1433776_AT, 1421225_A_AT, 1416203_AT, 1433891_AT, 1424562_A_AT, 1425582_A_AT, 1422645_AT, 1417962_S_AT, 1421374_A_AT, 1434210_S_AT, 1417481_AT, 1417275_AT, 1418912_AT, 1417070_AT, 1415993_AT, 1425914_A_AT, 1416357_A_AT, 1454654_AT, 1422780_AT, 1433615_AT, 1449038_AT, 1438426_AT, 1422009_AT, 1422438_AT, 1428619_AT, 1456204_AT, 1434273_AT, 1427371_AT, 1433779_AT, 1424912_AT, 1435751_AT, 1434191_AT,…	905	4113	16021	0.972727	1	1	100
UP_SEQ_FEATURE	topological domain:Extracellular	104	10.2161	0.979949	1424214_AT, 1421225_A_AT, 1416330_AT, 1416203_AT, 1429265_A_AT, 1433891_AT, 1416872_AT, 1418128_AT, 1416072_AT, 1422645_AT, 1425582_A_AT, 1417962_S_AT, 1421374_A_AT, 1434210_S_AT, 1424338_AT, 1417275_AT, 1417481_AT, 1418912_AT, 1418643_AT, 1416357_A_AT, 1448696_AT, 1435387_AT, 1428853_AT, 1428804_AT, 1438426_AT, 1422009_AT, 1418058_AT, 1451912_A_AT, 1434273_AT, 1448276_AT, 1439925_AT, 1417625_S_A…	905	2174	16021	0.846866	1	1	100
SP_PIR_KEYWORDS	transmembrane	233	22.888	0.996296	1433776_AT, 1421225_A_AT, 1416203_AT, 1433891_AT, 1424562_A_AT, 1425582_A_AT, 1422645_AT, 1417962_S_AT, 1421374_A_AT, 1434210_S_AT, 1417481_AT, 1417275_AT, 1418912_AT, 1417070_AT, 1415993_AT, 1425914_A_AT, 1416357_A_AT, 1454654_AT, 1422780_AT, 1433615_AT, 1449038_AT, 1438426_AT, 1422009_AT, 1422438_AT, 1428619_AT, 1456204_AT, 1434273_AT, 1427371_AT, 1433779_AT, 1424912_AT, 1422904_AT, 1435751_AT,…	911	5237	17854	0.871948	1	0.999998	100
UP_SEQ_FEATURE	topological domain:Cytoplasmic	128	12.5737	0.997512	1424214_AT, 1434354_AT, 1421225_A_AT, 1416330_AT, 1416203_AT, 1419499_AT, 1429265_A_AT, 1433891_AT, 1416872_AT, 1418128_AT, 1416072_AT, 1416849_AT, 1425582_A_AT, 1422645_AT, 1417962_S_AT, 1421374_A_AT, 1434210_S_AT, 1424338_AT, 1417275_AT, 1417481_AT, 1418912_AT, 1438566_AT, 1418643_AT, 1416357_A_AT, 1449038_AT, 1448696_AT, 1435387_AT, 1428853_AT, 1428804_AT, 1438426_AT, 1429514_AT, 1422009_AT, 1…	905	2780	16021	0.815091	1	1	100
GOTERM_CC_FAT	GO:0031224~intrinsic to membrane	252	24.7544	1	1433776_AT, 1421225_A_AT, 1416203_AT, 1433891_AT, 1417185_AT, 1424562_A_AT, 1425582_A_AT, 1422645_AT, 1417962_S_AT, 1421374_A_AT, 1434210_S_AT, 1417481_AT, 1417275_AT, 1418912_AT, 1415894_AT, 1417070_AT, 1415993_AT, 1425914_A_AT, 1416357_A_AT, 1454654_AT, 1422780_AT, 1433615_AT, 1449038_AT, 1438426_AT, 1422009_AT, 1422438_AT, 1417389_AT, 1449041_A_AT, 1428619_AT, 1456204_AT, 1434273_AT, 1427371_A…	681	5914	12504	0.782386	1	1	100
GOTERM_CC_FAT	GO:0016021~integral to membrane	240	23.5756	1	1433776_AT, 1421225_A_AT, 1416203_AT, 1433891_AT, 1424562_A_AT, 1425582_A_AT, 1422645_AT, 1417962_S_AT, 1421374_A_AT, 1434210_S_AT, 1417481_AT, 1417275_AT, 1418912_AT, 1415894_AT, 1417070_AT, 1415993_AT, 1425914_A_AT, 1416357_A_AT, 1454654_AT, 1422780_AT, 1433615_AT, 1449038_AT, 1438426_AT, 1422009_AT, 1422438_AT, 1449041_A_AT, 1428619_AT, 1456204_AT, 1434273_AT, 1427371_AT, 1433779_AT, 1424912_A…	681	5709	12504	0.771886	1	1	100
Annotation Cluster 175	Enrichment Score: 0.2283199814471642
Category	Term	Count	%	PValue	Genes	List Total	Pop Hits	Pop Total	Fold Enrichment	Bonferroni	Benjamini	FDR
KEGG_PATHWAY	mmu04540:Gap junction	7	0.687623	0.259565	1444232_AT, 1425338_AT, 1426319_AT, 1452281_AT, 1427510_AT, 1418128_AT, 1415800_AT	288	86	5738	1.62169	1	0.727341	97.345
KEGG_PATHWAY	mmu04916:Melanogenesis	4	0.392927	0.884043	1425338_AT, 1423594_A_AT, 1427510_AT, 1418128_AT	288	100	5738	0.796944	1	0.985819	100
KEGG_PATHWAY	mmu04062:Chemokine signaling pathway	7	0.687623	0.900163	1425338_AT, 1417574_AT, 1418456_A_AT, 1452281_AT, 1427510_AT, 1448942_AT, 1418128_AT	288	182	5738	0.766293	1	0.987587	100
Annotation Cluster 176	Enrichment Score: 0.2244486074989054
Category	Term	Count	%	PValue	Genes	List Total	Pop Hits	Pop Total	Fold Enrichment	Bonferroni	Benjamini	FDR
INTERPRO	IPR013098:Immunoglobulin I-set	9	0.884086	0.272204	1435649_AT, 1434210_S_AT, 1451912_A_AT, 1416473_A_AT, 1418450_AT, 1428259_AT, 1428804_AT, 1420841_AT, 1418551_AT	860	127	17763	1.46372	1	0.992601	99.4492
UP_SEQ_FEATURE	domain:Ig-like C2-type 3	7	0.687623	0.367493	1421287_A_AT, 1416357_A_AT, 1434210_S_AT, 1451912_A_AT, 1428259_AT, 1420841_AT, 1418551_AT	905	87	16021	1.42436	1	0.999999	99.9642
SMART	SM00408:IGc2	10	0.982318	0.423212	1416357_A_AT, 1434210_S_AT, 1451912_A_AT, 1416473_A_AT, 1418450_AT, 1428259_AT, 1460356_AT, 1428804_AT, 1420841_AT, 1418551_AT	397	187	9131	1.22995	1	0.963179	99.9128
UP_SEQ_FEATURE	domain:Ig-like C2-type 1	9	0.884086	0.452721	1421287_A_AT, 1416357_A_AT, 1434210_S_AT, 1448862_AT, 1451912_A_AT, 1428259_AT, 1418788_AT, 1420841_AT, 1418551_AT	905	130	16021	1.22558	1	1	99.9971
UP_SEQ_FEATURE	domain:Ig-like C2-type 2	9	0.884086	0.461329	1421287_A_AT, 1416357_A_AT, 1434210_S_AT, 1448862_AT, 1451912_A_AT, 1428259_AT, 1418788_AT, 1420841_AT, 1418551_AT	905	131	16021	1.21622	1	1	99.9978
INTERPRO	IPR003598:Immunoglobulin subtype 2	10	0.982318	0.554125	1416357_A_AT, 1434210_S_AT, 1451912_A_AT, 1416473_A_AT, 1418450_AT, 1428259_AT, 1460356_AT, 1428804_AT, 1420841_AT, 1418551_AT	860	187	17763	1.10453	1	0.999878	99.9998
INTERPRO	IPR013151:Immunoglobulin	9	0.884086	0.634327	1421287_A_AT, 1416357_A_AT, 1448788_AT, 1434210_S_AT, 1440225_AT, 1423135_AT, 1416473_A_AT, 1417505_S_AT, 1418551_AT	860	178	17763	1.04434	1	0.999971	100
SP_PIR_KEYWORDS	Immunoglobulin domain	22	2.1611	0.666279	1428167_A_AT, 1416357_A_AT, 1421287_A_AT, 1448788_AT, 1435649_AT, 1449130_AT, 1418450_AT, 1418788_AT, 1420841_AT, 1428804_AT, 1418551_AT, 1420696_AT, 1434210_S_AT, 1448862_AT, 1416978_AT, 1423135_AT, 1428259_AT, 1451912_A_AT, 1427329_A_AT, 1416473_A_AT, 1460356_AT, 1417505_S_AT	911	443	17854	0.973276	1	0.976861	100
UP_SEQ_FEATURE	domain:Ig-like C2-type 4	3	0.294695	0.832296	1421287_A_AT, 1428259_AT, 1418551_AT	905	56	16021	0.948362	1	1	100
INTERPRO	IPR007110:Immunoglobulin-like	25	2.4558	0.866343	1435290_X_AT, 1449130_AT, 1418450_AT, 1418551_AT, 1422645_AT, 1434210_S_AT, 1416978_AT, 1440225_AT, 1416473_A_AT, 1417505_S_AT, 1416357_A_AT, 1428167_A_AT, 1421287_A_AT, 1448788_AT, 1435649_AT, 1417025_AT, 1418788_AT, 1428804_AT, 1420841_AT, 1420696_AT, 1423135_AT, 1427329_A_AT, 1428259_AT, 1451912_A_AT, 1460356_AT	860	604	17763	0.854911	1	1	100
INTERPRO	IPR013783:Immunoglobulin-like fold	26	2.55403	0.896177	1435290_X_AT, 1449130_AT, 1418450_AT, 1420654_A_AT, 1418551_AT, 1422645_AT, 1434210_S_AT, 1416978_AT, 1416473_A_AT, 1456111_AT, 1428167_A_AT, 1416357_A_AT, 1421287_A_AT, 1448788_AT, 1435649_AT, 1417025_AT, 1418788_AT, 1428804_AT, 1420841_AT, 1420696_AT, 1417500_A_AT, 1448862_AT, 1427329_A_AT, 1428259_AT, 1451912_A_AT, 1460356_AT	860	644	17763	0.833883	1	1	100
SMART	SM00409:IG	10	0.982318	0.931569	1421287_A_AT, 1416357_A_AT, 1420696_AT, 1435649_AT, 1440225_AT, 1416473_A_AT, 1417505_S_AT, 1460356_AT, 1420841_AT, 1418551_AT	397	313	9131	0.734824	1	0.999982	100
INTERPRO	IPR003599:Immunoglobulin subtype	10	0.982318	0.969328	1421287_A_AT, 1416357_A_AT, 1420696_AT, 1435649_AT, 1440225_AT, 1416473_A_AT, 1417505_S_AT, 1460356_AT, 1420841_AT, 1418551_AT	860	313	17763	0.659893	1	1	100
Annotation Cluster 177	Enrichment Score: 0.22174606381054254
Category	Term	Count	%	PValue	Genes	List Total	Pop Hits	Pop Total	Fold Enrichment	Bonferroni	Benjamini	FDR
INTERPRO	IPR012680:Laminin G, subdomain 2	3	0.294695	0.568813	1448755_AT, 1417399_AT, 1426285_AT	860	39	17763	1.58882	1	0.999895	99.9999
SMART	SM00282:LamG	3	0.294695	0.587219	1448755_AT, 1417399_AT, 1426285_AT	397	45	9131	1.53333	1	0.988703	99.9988
INTERPRO	IPR001791:Laminin G	3	0.294695	0.647131	1448755_AT, 1417399_AT, 1426285_AT	860	45	17763	1.37698	1	0.999974	100
Annotation Cluster 178	Enrichment Score: 0.2153106377998344
Category	Term	Count	%	PValue	Genes	List Total	Pop Hits	Pop Total	Fold Enrichment	Bonferroni	Benjamini	FDR
INTERPRO	IPR015615:Transforming growth factor-beta-related	3	0.294695	0.462556	1450759_AT, 1424007_AT, 1422912_AT	860	32	17763	1.93637	1	0.999406	99.9962
SMART	SM00204:TGFB	3	0.294695	0.481266	1450759_AT, 1424007_AT, 1422912_AT	397	37	9131	1.86486	1	0.978446	99.9776
INTERPRO	IPR001839:Transforming growth factor beta	3	0.294695	0.540054	1450759_AT, 1424007_AT, 1422912_AT	860	37	17763	1.6747	1	0.99984	99.9997
INTERPRO	IPR017948:Transforming growth factor beta, conserved site	3	0.294695	0.540054	1450759_AT, 1424007_AT, 1422912_AT	860	37	17763	1.6747	1	0.99984	99.9997
GOTERM_MF_FAT	GO:0005125~cytokine activity	7	0.687623	0.880743	1417574_AT, 1418456_A_AT, 1450759_AT, 1416335_AT, 1424007_AT, 1422912_AT, 1449254_AT	652	180	13288	0.79257	1	0.999987	100
SP_PIR_KEYWORDS	cytokine	7	0.687623	0.893025	1417574_AT, 1418456_A_AT, 1450759_AT, 1416335_AT, 1424007_AT, 1422912_AT, 1449254_AT	911	177	17854	0.775072	1	0.998215	100
Annotation Cluster 179	Enrichment Score: 0.21189730469287535
Category	Term	Count	%	PValue	Genes	List Total	Pop Hits	Pop Total	Fold Enrichment	Bonferroni	Benjamini	FDR
GOTERM_BP_FAT	GO:0021904~dorsal/ventral neural tube patterning	3	0.294695	0.175318	1428853_AT, 1422912_AT, 1427048_AT	648	16	13588	3.93171	1	0.849905	96.6327
GOTERM_BP_FAT	GO:0021532~neural tube patterning	3	0.294695	0.317851	1428853_AT, 1422912_AT, 1427048_AT	648	24	13588	2.62114	1	0.949301	99.8804
KEGG_PATHWAY	mmu04340:Hedgehog signaling pathway	4	0.392927	0.511787	1450759_AT, 1428853_AT, 1422912_AT, 1427048_AT	288	54	5738	1.47582	1	0.875796	99.9826
GOTERM_BP_FAT	GO:0021915~neural tube development	4	0.392927	0.762797	1434917_AT, 1428853_AT, 1422912_AT, 1427048_AT	648	83	13588	1.01056	1	0.999282	100
KEGG_PATHWAY	mmu05217:Basal cell carcinoma	3	0.294695	0.76974	1428853_AT, 1422912_AT, 1427048_AT	288	55	5738	1.08674	1	0.966804	100
GOTERM_BP_FAT	GO:0009953~dorsal/ventral pattern formation	3	0.294695	0.815671	1428853_AT, 1422912_AT, 1427048_AT	648	64	13588	0.982928	1	0.999717	100
GOTERM_BP_FAT	GO:0003002~regionalization	7	0.687623	0.945366	1424254_AT, 1418157_AT, 1428853_AT, 1426981_AT, 1418517_AT, 1422912_AT, 1427048_AT	648	214	13588	0.685906	1	0.999995	100
GOTERM_BP_FAT	GO:0007389~pattern specification process	9	0.884086	0.963843	1417271_A_AT, 1424254_AT, 1418157_AT, 1417574_AT, 1428853_AT, 1426981_AT, 1418517_AT, 1422912_AT, 1427048_AT	648	284	13588	0.664515	1	0.999999	100
GOTERM_BP_FAT	GO:0009952~anterior/posterior pattern formation	3	0.294695	0.995202	1424254_AT, 1418157_AT, 1426981_AT	648	153	13588	0.41116	1	1	100
Annotation Cluster 180	Enrichment Score: 0.20999681577002208
Category	Term	Count	%	PValue	Genes	List Total	Pop Hits	Pop Total	Fold Enrichment	Bonferroni	Benjamini	FDR
SP_PIR_KEYWORDS	guanine-nucleotide releasing factor	8	0.785855	0.2638	1434140_AT, 1448740_AT, 1444028_S_AT, 1460578_AT, 1424470_A_AT, 1452281_AT, 1452398_AT, 1429012_AT	911	102	17854	1.53712	1	0.819631	98.7079
GOTERM_MF_FAT	GO:0005089~Rho guanyl-nucleotide exchange factor activity	5	0.491159	0.461546	1434140_AT, 1444028_S_AT, 1460578_AT, 1452281_AT, 1429012_AT	652	71	13288	1.43524	1	0.990288	99.9927
SMART	SM00325:RhoGEF	4	0.392927	0.540037	1434140_AT, 1460578_AT, 1452281_AT, 1429012_AT	397	65	9131	1.41538	1	0.98372	99.9952
GOTERM_MF_FAT	GO:0005088~Ras guanyl-nucleotide exchange factor activity	5	0.491159	0.585157	1434140_AT, 1444028_S_AT, 1460578_AT, 1452281_AT, 1429012_AT	652	83	13288	1.22773	1	0.997479	99.9999
GOTERM_MF_FAT	GO:0005085~guanyl-nucleotide exchange factor activity	8	0.785855	0.585223	1434140_AT, 1448740_AT, 1444028_S_AT, 1460578_AT, 1424470_A_AT, 1452281_AT, 1452398_AT, 1429012_AT	652	147	13288	1.10914	1	0.997354	99.9999
GOTERM_BP_FAT	GO:0035023~regulation of Rho protein signal transduction	5	0.491159	0.590605	1434140_AT, 1431798_A_AT, 1460578_AT, 1452281_AT, 1429012_AT	648	86	13588	1.21914	1	0.995082	100
INTERPRO	IPR000219:Dbl homology (DH) domain	4	0.392927	0.614628	1434140_AT, 1460578_AT, 1452281_AT, 1429012_AT	860	65	17763	1.27106	1	0.999957	100
UP_SEQ_FEATURE	domain:DH	4	0.392927	0.619219	1434140_AT, 1460578_AT, 1452281_AT, 1429012_AT	905	56	16021	1.26448	1	1	100
GOTERM_MF_FAT	GO:0030695~GTPase regulator activity	17	1.66994	0.696692	1453638_AT, 1426743_AT, 1455144_S_AT, 1431798_A_AT, 1424470_A_AT, 1452398_AT, 1417466_AT, 1429012_AT, 1424842_A_AT, 1434140_AT, 1448740_AT, 1436197_AT, 1444028_S_AT, 1460578_AT, 1421594_A_AT, 1452281_AT, 1423135_AT	652	361	13288	0.95974	1	0.999408	100
GOTERM_MF_FAT	GO:0060589~nucleoside-triphosphatase regulator activity	17	1.66994	0.720982	1453638_AT, 1426743_AT, 1455144_S_AT, 1431798_A_AT, 1424470_A_AT, 1452398_AT, 1417466_AT, 1429012_AT, 1424842_A_AT, 1434140_AT, 1448740_AT, 1436197_AT, 1444028_S_AT, 1460578_AT, 1421594_A_AT, 1452281_AT, 1423135_AT	652	367	13288	0.94405	1	0.999603	100
INTERPRO	IPR001331:Guanine-nucleotide dissociation stimulator, CDC24, conserved site	3	0.294695	0.733468	1434140_AT, 1452281_AT, 1429012_AT	860	53	17763	1.16913	1	0.999997	100
GOTERM_MF_FAT	GO:0005083~small GTPase regulator activity	10	0.982318	0.770182	1434140_AT, 1436197_AT, 1426743_AT, 1444028_S_AT, 1431798_A_AT, 1460578_AT, 1421594_A_AT, 1452281_AT, 1423135_AT, 1429012_AT	652	223	13288	0.913918	1	0.999799	100
GOTERM_BP_FAT	GO:0046578~regulation of Ras protein signal transduction	7	0.687623	0.867063	1434140_AT, 1431798_A_AT, 1460578_AT, 1452281_AT, 1435272_AT, 1452398_AT, 1429012_AT	648	181	13588	0.810961	1	0.999899	100
GOTERM_BP_FAT	GO:0051056~regulation of small GTPase mediated signal transduction	8	0.785855	0.922132	1434140_AT, 1431798_A_AT, 1460578_AT, 1424470_A_AT, 1452281_AT, 1435272_AT, 1452398_AT, 1429012_AT	648	228	13588	0.735759	1	0.999984	100
Annotation Cluster 181	Enrichment Score: 0.20570300232893154
Category	Term	Count	%	PValue	Genes	List Total	Pop Hits	Pop Total	Fold Enrichment	Bonferroni	Benjamini	FDR
GOTERM_BP_FAT	GO:0042158~lipoprotein biosynthetic process	4	0.392927	0.490362	1436038_A_AT, 1432466_A_AT, 1428556_AT, 1419081_AT	648	55	13588	1.52503	1	0.987837	99.9993
GOTERM_BP_FAT	GO:0006497~protein amino acid lipidation	3	0.294695	0.695299	1436038_A_AT, 1428556_AT, 1419081_AT	648	50	13588	1.25815	1	0.998293	100
GOTERM_BP_FAT	GO:0042157~lipoprotein metabolic process	4	0.392927	0.708276	1436038_A_AT, 1432466_A_AT, 1428556_AT, 1419081_AT	648	76	13588	1.10364	1	0.998548	100
Annotation Cluster 182	Enrichment Score: 0.2038842135143798
Category	Term	Count	%	PValue	Genes	List Total	Pop Hits	Pop Total	Fold Enrichment	Bonferroni	Benjamini	FDR
UP_SEQ_FEATURE	domain:Fibronectin type-III 3	6	0.589391	0.40642	1435603_AT, 1427486_AT, 1416473_A_AT, 1418788_AT, 1420841_AT, 1418551_AT	905	74	16021	1.43536	1	1	99.9881
INTERPRO	IPR008957:Fibronectin, type III-like fold	10	0.982318	0.554125	1417962_S_AT, 1417500_A_AT, 1427053_AT, 1435603_AT, 1427486_AT, 1416473_A_AT, 1417505_S_AT, 1418788_AT, 1420841_AT, 1418551_AT	860	187	17763	1.10453	1	0.999878	99.9998
SMART	SM00060:FN3	9	0.884086	0.591483	1417962_S_AT, 1427053_AT, 1435603_AT, 1427486_AT, 1416473_A_AT, 1417505_S_AT, 1418788_AT, 1420841_AT, 1418551_AT	397	191	9131	1.08377	1	0.988171	99.9989
UP_SEQ_FEATURE	domain:Fibronectin type-III 5	3	0.294695	0.640289	1427486_AT, 1416473_A_AT, 1420841_AT	905	38	16021	1.39759	1	1	100
UP_SEQ_FEATURE	domain:Fibronectin type-III 2	7	0.687623	0.677018	1435603_AT, 1427486_AT, 1416473_A_AT, 1417505_S_AT, 1418788_AT, 1420841_AT, 1418551_AT	905	120	16021	1.03266	1	1	100
UP_SEQ_FEATURE	domain:Fibronectin type-III 1	7	0.687623	0.684771	1435603_AT, 1427486_AT, 1416473_A_AT, 1417505_S_AT, 1418788_AT, 1420841_AT, 1418551_AT	905	121	16021	1.02413	1	1	100
INTERPRO	IPR003961:Fibronectin, type III	9	0.884086	0.710562	1417962_S_AT, 1427053_AT, 1435603_AT, 1427486_AT, 1416473_A_AT, 1417505_S_AT, 1418788_AT, 1420841_AT, 1418551_AT	860	191	17763	0.973256	1	0.999995	100
UP_SEQ_FEATURE	domain:Fibronectin type-III 4	3	0.294695	0.832296	1427486_AT, 1416473_A_AT, 1420841_AT	905	56	16021	0.948362	1	1	100
Annotation Cluster 183	Enrichment Score: 0.19632007524043985
Category	Term	Count	%	PValue	Genes	List Total	Pop Hits	Pop Total	Fold Enrichment	Bonferroni	Benjamini	FDR
GOTERM_BP_FAT	GO:0016311~dephosphorylation	9	0.884086	0.357382	1435510_AT, 1455091_AT, 1435699_AT, 1437122_AT, 1437869_AT, 1427486_AT, 1455450_AT, 1456315_A_AT, 1420841_AT, 1435294_AT	648	141	13588	1.33846	1	0.963103	99.9582
GOTERM_BP_FAT	GO:0006470~protein amino acid dephosphorylation	7	0.687623	0.460805	1435510_AT, 1455091_AT, 1435699_AT, 1437122_AT, 1437869_AT, 1427486_AT, 1455450_AT, 1420841_AT	648	114	13588	1.28758	1	0.984445	99.9981
GOTERM_MF_FAT	GO:0016791~phosphatase activity	13	1.27701	0.498121	1435510_AT, 1427903_AT, 1418288_AT, 1435699_AT, 1448499_A_AT, 1422510_AT, 1427486_AT, 1455450_AT, 1420841_AT, 1435294_AT, 1428245_AT, 1429514_AT, 1456315_A_AT	652	238	13288	1.11321	1	0.993114	99.9975
SMART	SM00194:PTPc	3	0.294695	0.536314	1427486_AT, 1455450_AT, 1420841_AT	397	41	9131	1.68293	1	0.98458	99.9947
GOTERM_CC_FAT	GO:0008287~protein serine/threonine phosphatase complex	3	0.294695	0.558821	1435510_AT, 1435699_AT, 1437122_AT	681	34	12504	1.62011	1	0.962448	99.9988
SP_PIR_KEYWORDS	protein phosphatase	7	0.687623	0.578003	1435510_AT, 1427903_AT, 1435699_AT, 1427486_AT, 1422510_AT, 1455450_AT, 1420841_AT	911	120	17854	1.14323	1	0.962532	99.9995
INTERPRO	IPR000242:Protein-tyrosine phosphatase, receptor/non-receptor type	3	0.294695	0.596248	1427486_AT, 1455450_AT, 1420841_AT	860	41	17763	1.51132	1	0.99994	100
GOTERM_MF_FAT	GO:0004721~phosphoprotein phosphatase activity	8	0.785855	0.620698	1435510_AT, 1427903_AT, 1435699_AT, 1427486_AT, 1422510_AT, 1455450_AT, 1456315_A_AT, 1420841_AT	652	152	13288	1.07265	1	0.99839	100
INTERPRO	IPR016130:Protein-tyrosine phosphatase, active site	4	0.392927	0.798585	1427486_AT, 1455450_AT, 1456315_A_AT, 1420841_AT	860	87	17763	0.949639	1	1	100
GOTERM_MF_FAT	GO:0004725~protein tyrosine phosphatase activity	4	0.392927	0.878215	1427486_AT, 1455450_AT, 1456315_A_AT, 1420841_AT	652	101	13288	0.807143	1	0.999988	100
INTERPRO	IPR000387:Protein-tyrosine phosphatase	3	0.294695	0.896592	1427486_AT, 1455450_AT, 1420841_AT	860	78	17763	0.79441	1	1	100
INTERPRO	IPR000387:Dual-specific/protein-tyrosine phosphatase, conserved region	3	0.294695	0.911778	1427486_AT, 1455450_AT, 1420841_AT	860	82	17763	0.755658	1	1	100
UP_SEQ_FEATURE	active site:Phosphocysteine intermediate	3	0.294695	0.930079	1427486_AT, 1455450_AT, 1420841_AT	905	75	16021	0.70811	1	1	100
Annotation Cluster 184	Enrichment Score: 0.19322828444252557
Category	Term	Count	%	PValue	Genes	List Total	Pop Hits	Pop Total	Fold Enrichment	Bonferroni	Benjamini	FDR
GOTERM_BP_FAT	GO:0006639~acylglycerol metabolic process	3	0.294695	0.613869	1417639_AT, 1416429_A_AT, 1438936_S_AT	648	43	13588	1.46296	1	0.996182	100
GOTERM_BP_FAT	GO:0006662~glycerol ether metabolic process	3	0.294695	0.638713	1417639_AT, 1416429_A_AT, 1438936_S_AT	648	45	13588	1.39794	1	0.996944	100
GOTERM_BP_FAT	GO:0006638~neutral lipid metabolic process	3	0.294695	0.638713	1417639_AT, 1416429_A_AT, 1438936_S_AT	648	45	13588	1.39794	1	0.996944	100
GOTERM_BP_FAT	GO:0018904~organic ether metabolic process	3	0.294695	0.673597	1417639_AT, 1416429_A_AT, 1438936_S_AT	648	48	13588	1.31057	1	0.997752	100
Annotation Cluster 185	Enrichment Score: 0.19186354842956316
Category	Term	Count	%	PValue	Genes	List Total	Pop Hits	Pop Total	Fold Enrichment	Bonferroni	Benjamini	FDR
GOTERM_BP_FAT	GO:0002237~response to molecule of bacterial origin	4	0.392927	0.415	1416034_AT, 1450852_S_AT, 1447520_AT, 1418142_AT	648	49	13588	1.71177	1	0.977198	99.992
GOTERM_BP_FAT	GO:0032496~response to lipopolysaccharide	3	0.294695	0.546128	1450852_S_AT, 1447520_AT, 1418142_AT	648	38	13588	1.65546	1	0.992494	99.9999
GOTERM_BP_FAT	GO:0001817~regulation of cytokine production	6	0.589391	0.797499	1417426_AT, 1416034_AT, 1450852_S_AT, 1447520_AT, 1418318_AT, 1449130_AT	648	139	13588	0.905143	1	0.9996	100
GOTERM_BP_FAT	GO:0009617~response to bacterium	5	0.491159	0.945089	1416034_AT, 1450852_S_AT, 1447520_AT, 1418142_AT, 1423547_AT	648	157	13588	0.667807	1	0.999995	100
Annotation Cluster 186	Enrichment Score: 0.19028266742579092
Category	Term	Count	%	PValue	Genes	List Total	Pop Hits	Pop Total	Fold Enrichment	Bonferroni	Benjamini	FDR
SMART	SM00324:RhoGAP	5	0.491159	0.331025	1453638_AT, 1455144_S_AT, 1431798_A_AT, 1437424_AT, 1424842_A_AT	397	67	9131	1.71642	1	0.962126	99.4182
INTERPRO	IPR000198:RhoGAP	5	0.491159	0.407761	1453638_AT, 1455144_S_AT, 1431798_A_AT, 1437424_AT, 1424842_A_AT	860	67	17763	1.54139	1	0.99898	99.9811
GOTERM_MF_FAT	GO:0008047~enzyme activator activity	12	1.17878	0.680989	1453638_AT, 1416034_AT, 1455144_S_AT, 1418497_AT, 1431798_A_AT, 1421340_AT, 1432466_A_AT, 1423062_AT, 1423135_AT, 1417466_AT, 1418003_AT, 1424842_A_AT	652	249	13288	0.982186	1	0.999273	100
UP_SEQ_FEATURE	domain:Rho-GAP	3	0.294695	0.839606	1455144_S_AT, 1431798_A_AT, 1424842_A_AT	905	57	16021	0.931724	1	1	100
GOTERM_MF_FAT	GO:0005096~GTPase activator activity	6	0.589391	0.961823	1453638_AT, 1455144_S_AT, 1431798_A_AT, 1423135_AT, 1417466_AT, 1424842_A_AT	652	192	13288	0.636887	1	1	100
SP_PIR_KEYWORDS	GTPase activation	4	0.392927	0.972134	1453638_AT, 1455144_S_AT, 1431798_A_AT, 1424842_A_AT	911	136	17854	0.576419	1	0.99991	100
Annotation Cluster 187	Enrichment Score: 0.1898517994190784
Category	Term	Count	%	PValue	Genes	List Total	Pop Hits	Pop Total	Fold Enrichment	Bonferroni	Benjamini	FDR
GOTERM_CC_FAT	GO:0030427~site of polarized growth	4	0.392927	0.529772	1423280_AT, 1442823_AT, 1423135_AT, 1438936_S_AT	681	51	12504	1.4401	1	0.957671	99.997
GOTERM_CC_FAT	GO:0030426~growth cone	4	0.392927	0.529772	1423280_AT, 1442823_AT, 1423135_AT, 1438936_S_AT	681	51	12504	1.4401	1	0.957671	99.997
GOTERM_CC_FAT	GO:0043005~neuron projection	9	0.884086	0.959991	1425338_AT, 1423280_AT, 1423630_AT, 1442823_AT, 1423135_AT, 1422470_AT, 1417788_AT, 1438936_S_AT, 1456609_AT	681	245	12504	0.674494	1	0.999888	100
Annotation Cluster 188	Enrichment Score: 0.1851022765039025
Category	Term	Count	%	PValue	Genes	List Total	Pop Hits	Pop Total	Fold Enrichment	Bonferroni	Benjamini	FDR
SMART	SM00225:BTB	9	0.884086	0.523366	1416242_AT, 1429722_AT, 1435743_AT, 1422064_A_AT, 1435153_AT, 1440355_AT, 1434881_S_AT, 1428779_AT, 1435397_AT	397	180	9131	1.15	1	0.983767	99.9924
INTERPRO	IPR013069:BTB/POZ	7	0.687623	0.589577	1416242_AT, 1429722_AT, 1435743_AT, 1422064_A_AT, 1435153_AT, 1428779_AT, 1435397_AT	860	128	17763	1.12955	1	0.999933	100
INTERPRO	IPR000210:BTB/POZ-like	9	0.884086	0.64675	1416242_AT, 1429722_AT, 1435743_AT, 1422064_A_AT, 1435153_AT, 1440355_AT, 1434881_S_AT, 1428779_AT, 1435397_AT	860	180	17763	1.03273	1	0.999976	100
INTERPRO	IPR011333:BTB/POZ fold	9	0.884086	0.64675	1416242_AT, 1429722_AT, 1435743_AT, 1422064_A_AT, 1435153_AT, 1440355_AT, 1434881_S_AT, 1428779_AT, 1435397_AT	860	180	17763	1.03273	1	0.999976	100
UP_SEQ_FEATURE	domain:BTB	6	0.589391	0.771184	1416242_AT, 1435743_AT, 1422064_A_AT, 1435153_AT, 1428779_AT, 1435397_AT	905	113	16021	0.93997	1	1	100
INTERPRO	IPR013089:Kelch related	4	0.392927	0.778771	1416242_AT, 1435743_AT, 1435153_AT, 1435397_AT	860	84	17763	0.983555	1	0.999999	100
Annotation Cluster 189	Enrichment Score: 0.18415174740843945
Category	Term	Count	%	PValue	Genes	List Total	Pop Hits	Pop Total	Fold Enrichment	Bonferroni	Benjamini	FDR
GOTERM_BP_FAT	GO:0002252~immune effector process	9	0.884086	0.251846	1448508_AT, 1447520_AT, 1435290_X_AT, 1416625_AT, 1418142_AT, 1423153_X_AT, 1422470_AT, 1435751_AT, 1427329_A_AT	648	126	13588	1.4978	1	0.916596	99.393
GOTERM_BP_FAT	GO:0050778~positive regulation of immune response	8	0.785855	0.471819	1416034_AT, 1447520_AT, 1435290_X_AT, 1416625_AT, 1449130_AT, 1423153_X_AT, 1423135_AT, 1427329_A_AT	648	136	13588	1.23348	1	0.985648	99.9987
GOTERM_BP_FAT	GO:0006959~humoral immune response	4	0.392927	0.478114	1448508_AT, 1416625_AT, 1423153_X_AT, 1427329_A_AT	648	54	13588	1.55327	1	0.986591	99.9989
GOTERM_BP_FAT	GO:0002250~adaptive immune response	4	0.392927	0.769869	1453851_A_AT, 1435290_X_AT, 1416625_AT, 1427329_A_AT	648	84	13588	0.99853	1	0.999374	100
GOTERM_BP_FAT	GO:0002460~adaptive immune response based on somatic recombination of immune receptors built from immunoglobulin superfamily domains	4	0.392927	0.769869	1453851_A_AT, 1435290_X_AT, 1416625_AT, 1427329_A_AT	648	84	13588	0.99853	1	0.999374	100
GOTERM_BP_FAT	GO:0002253~activation of immune response	4	0.392927	0.783498	1416625_AT, 1423153_X_AT, 1423135_AT, 1427329_A_AT	648	86	13588	0.975309	1	0.999509	100
GOTERM_BP_FAT	GO:0016064~immunoglobulin mediated immune response	3	0.294695	0.808728	1435290_X_AT, 1416625_AT, 1427329_A_AT	648	63	13588	0.99853	1	0.999683	100
GOTERM_BP_FAT	GO:0019724~B cell mediated immunity	3	0.294695	0.822387	1435290_X_AT, 1416625_AT, 1427329_A_AT	648	65	13588	0.967806	1	0.99976	100
GOTERM_BP_FAT	GO:0002449~lymphocyte mediated immunity	3	0.294695	0.882948	1435290_X_AT, 1416625_AT, 1427329_A_AT	648	76	13588	0.827729	1	0.999935	100
GOTERM_BP_FAT	GO:0002443~leukocyte mediated immunity	3	0.294695	0.929725	1435290_X_AT, 1416625_AT, 1427329_A_AT	648	89	13588	0.706825	1	0.999989	100
Annotation Cluster 190	Enrichment Score: 0.17362178806213213
Category	Term	Count	%	PValue	Genes	List Total	Pop Hits	Pop Total	Fold Enrichment	Bonferroni	Benjamini	FDR
SMART	SM00612:Kelch	4	0.392927	0.560749	1443932_AT, 1416242_AT, 1435743_AT, 1435620_AT	397	67	9131	1.37313	1	0.98592	99.9973
UP_SEQ_FEATURE	repeat:Kelch 3	4	0.392927	0.631258	1443932_AT, 1416242_AT, 1435743_AT, 1435620_AT	905	57	16021	1.2423	1	1	100
UP_SEQ_FEATURE	repeat:Kelch 2	4	0.392927	0.631258	1443932_AT, 1416242_AT, 1435743_AT, 1435620_AT	905	57	16021	1.2423	1	1	100
UP_SEQ_FEATURE	repeat:Kelch 1	4	0.392927	0.631258	1443932_AT, 1416242_AT, 1435743_AT, 1435620_AT	905	57	16021	1.2423	1	1	100
INTERPRO	IPR015915:Kelch-type beta propeller	4	0.392927	0.635188	1443932_AT, 1416242_AT, 1435743_AT, 1435620_AT	860	67	17763	1.23311	1	0.999969	100
INTERPRO	IPR006652:Kelch repeat type 1	4	0.392927	0.635188	1443932_AT, 1416242_AT, 1435743_AT, 1435620_AT	860	67	17763	1.23311	1	0.999969	100
SP_PIR_KEYWORDS	kelch repeat	4	0.392927	0.680508	1443932_AT, 1416242_AT, 1435743_AT, 1435620_AT	911	68	17854	1.15284	1	0.978876	100
UP_SEQ_FEATURE	repeat:Kelch 6	3	0.294695	0.71845	1443932_AT, 1416242_AT, 1435743_AT	905	44	16021	1.20701	1	1	100
UP_SEQ_FEATURE	repeat:Kelch 5	3	0.294695	0.799964	1443932_AT, 1416242_AT, 1435743_AT	905	52	16021	1.02131	1	1	100
UP_SEQ_FEATURE	repeat:Kelch 4	3	0.294695	0.824686	1443932_AT, 1416242_AT, 1435743_AT	905	55	16021	0.965605	1	1	100
Annotation Cluster 191	Enrichment Score: 0.16893443148548484
Category	Term	Count	%	PValue	Genes	List Total	Pop Hits	Pop Total	Fold Enrichment	Bonferroni	Benjamini	FDR
GOTERM_BP_FAT	GO:0021987~cerebral cortex development	3	0.294695	0.531621	1425745_A_AT, 1416967_AT, 1422627_A_AT	648	37	13588	1.7002	1	0.991202	99.9998
GOTERM_BP_FAT	GO:0021537~telencephalon development	4	0.392927	0.673046	1425745_A_AT, 1416967_AT, 1422627_A_AT, 1422912_AT	648	72	13588	1.16495	1	0.997762	100
GOTERM_BP_FAT	GO:0021543~pallium development	3	0.294695	0.725601	1425745_A_AT, 1416967_AT, 1422627_A_AT	648	53	13588	1.18693	1	0.998803	100
GOTERM_BP_FAT	GO:0030900~forebrain development	7	0.687623	0.812677	1444232_AT, 1418157_AT, 1425745_A_AT, 1416967_AT, 1416293_AT, 1422627_A_AT, 1422912_AT	648	167	13588	0.878946	1	0.999704	100
Annotation Cluster 192	Enrichment Score: 0.1684458980827828
Category	Term	Count	%	PValue	Genes	List Total	Pop Hits	Pop Total	Fold Enrichment	Bonferroni	Benjamini	FDR
GOTERM_BP_FAT	GO:0048806~genitalia development	3	0.294695	0.300006	1416967_AT, 1433891_AT, 1437745_AT	648	23	13588	2.7351	1	0.941275	99.8117
GOTERM_BP_FAT	GO:0046546~development of primary male sexual characteristics	3	0.294695	0.725601	1416967_AT, 1433891_AT, 1437122_AT	648	53	13588	1.18693	1	0.998803	100
GOTERM_BP_FAT	GO:0045137~development of primary sexual characteristics	5	0.491159	0.736039	1450716_AT, 1416967_AT, 1433891_AT, 1437122_AT, 1437745_AT	648	104	13588	1.00813	1	0.998947	100
GOTERM_BP_FAT	GO:0046661~male sex differentiation	3	0.294695	0.762001	1416967_AT, 1433891_AT, 1437122_AT	648	57	13588	1.10364	1	0.999291	100
GOTERM_BP_FAT	GO:0046545~development of primary female sexual characteristics	3	0.294695	0.762001	1450716_AT, 1437122_AT, 1437745_AT	648	57	13588	1.10364	1	0.999291	100
GOTERM_BP_FAT	GO:0046660~female sex differentiation	3	0.294695	0.815671	1450716_AT, 1437122_AT, 1437745_AT	648	64	13588	0.982928	1	0.999717	100
GOTERM_BP_FAT	GO:0007548~sex differentiation	5	0.491159	0.872415	1450716_AT, 1416967_AT, 1433891_AT, 1437122_AT, 1437745_AT	648	130	13588	0.806505	1	0.99991	100
Annotation Cluster 193	Enrichment Score: 0.16797643531607362
Category	Term	Count	%	PValue	Genes	List Total	Pop Hits	Pop Total	Fold Enrichment	Bonferroni	Benjamini	FDR
GOTERM_CC_FAT	GO:0031300~intrinsic to organelle membrane	8	0.785855	0.408685	1422904_AT, 1417403_AT, 1418074_AT, 1428636_AT, 1422470_AT, 1438566_AT, 1420632_A_AT, 1417429_AT	681	112	12504	1.31152	1	0.916317	99.9293
GOTERM_CC_FAT	GO:0031227~intrinsic to endoplasmic reticulum membrane	4	0.392927	0.543042	1422904_AT, 1417403_AT, 1420632_A_AT, 1417429_AT	681	52	12504	1.4124	1	0.959648	99.998
GOTERM_CC_FAT	GO:0044432~endoplasmic reticulum part	13	1.27701	0.60729	1435290_X_AT, 1436867_AT, 1422904_AT, 1424382_AT, 1437122_AT, 1417429_AT, 1428556_AT, 1450843_A_AT, 1417403_AT, 1428333_AT, 1416803_AT, 1423677_AT, 1420632_A_AT	681	231	12504	1.03332	1	0.971491	99.9998
GOTERM_CC_FAT	GO:0005789~endoplasmic reticulum membrane	7	0.687623	0.841063	1422904_AT, 1417403_AT, 1428333_AT, 1437122_AT, 1420632_A_AT, 1417429_AT, 1428556_AT	681	152	12504	0.845583	1	0.997565	100
GOTERM_CC_FAT	GO:0042175~nuclear envelope-endoplasmic reticulum network	7	0.687623	0.873609	1422904_AT, 1417403_AT, 1428333_AT, 1437122_AT, 1420632_A_AT, 1417429_AT, 1428556_AT	681	160	12504	0.803304	1	0.998707	100
GOTERM_CC_FAT	GO:0012505~endomembrane system	19	1.8664	0.991693	1451665_A_AT, 1422904_AT, 1418074_AT, 1428636_AT, 1416178_A_AT, 1437122_AT, 1452398_AT, 1418455_AT, 1420958_AT, 1417429_AT, 1443870_AT, 1428556_AT, 1444028_S_AT, 1417403_AT, 1428333_AT, 1422470_AT, 1438566_AT, 1417900_A_AT, 1420632_A_AT	681	535	12504	0.652081	1	0.999995	100
Annotation Cluster 194	Enrichment Score: 0.1648208793065167
Category	Term	Count	%	PValue	Genes	List Total	Pop Hits	Pop Total	Fold Enrichment	Bonferroni	Benjamini	FDR
GOTERM_BP_FAT	GO:0009306~protein secretion	3	0.294695	0.282086	1448508_AT, 1436739_AT, 1428898_AT	648	22	13588	2.85943	1	0.935502	99.7062
GOTERM_BP_FAT	GO:0032940~secretion by cell	7	0.687623	0.88301	1448508_AT, 1436739_AT, 1421594_A_AT, 1428636_AT, 1428898_AT, 1451499_AT, 1423104_AT	648	186	13588	0.789161	1	0.999934	100
GOTERM_BP_FAT	GO:0046903~secretion	8	0.785855	0.906889	1448508_AT, 1448752_AT, 1436739_AT, 1421594_A_AT, 1428636_AT, 1428898_AT, 1451499_AT, 1423104_AT	648	221	13588	0.759064	1	0.999968	100
GOTERM_BP_FAT	GO:0006887~exocytosis	3	0.294695	0.970097	1421594_A_AT, 1428636_AT, 1451499_AT	648	110	13588	0.571886	1	0.999999	100
Annotation Cluster 195	Enrichment Score: 0.15909960531216696
Category	Term	Count	%	PValue	Genes	List Total	Pop Hits	Pop Total	Fold Enrichment	Bonferroni	Benjamini	FDR
GOTERM_BP_FAT	GO:0010608~posttranscriptional regulation of gene expression	8	0.785855	0.561905	1429735_AT, 1417960_AT, 1422528_A_AT, 1419155_A_AT, 1448325_AT, 1437122_AT, 1427048_AT, 1438936_S_AT	648	148	13588	1.13347	1	0.99349	100
GOTERM_BP_FAT	GO:0006417~regulation of translation	5	0.491159	0.707498	1429735_AT, 1417960_AT, 1422528_A_AT, 1448325_AT, 1438936_S_AT	648	100	13588	1.04846	1	0.998548	100
SP_PIR_KEYWORDS	translation regulation	3	0.294695	0.838133	1429735_AT, 1417960_AT, 1448325_AT	911	63	17854	0.93325	1	0.995759	100
Annotation Cluster 196	Enrichment Score: 0.15857500087044515
Category	Term	Count	%	PValue	Genes	List Total	Pop Hits	Pop Total	Fold Enrichment	Bonferroni	Benjamini	FDR
UP_SEQ_FEATURE	region of interest:Calmodulin-binding	4	0.392927	0.527753	1434511_AT, 1423535_AT, 1422743_AT, 1416825_AT	905	49	16021	1.44512	1	1	99.9998
SP_PIR_KEYWORDS	calmodulin-binding	5	0.491159	0.77654	1434511_AT, 1423535_AT, 1422743_AT, 1416825_AT, 1426724_AT	911	103	17854	0.951371	1	0.990126	100
GOTERM_MF_FAT	GO:0005516~calmodulin binding	5	0.491159	0.815981	1434511_AT, 1423535_AT, 1422743_AT, 1416825_AT, 1426724_AT	652	114	13288	0.893876	1	0.999917	100
Annotation Cluster 197	Enrichment Score: 0.15672763498709957
Category	Term	Count	%	PValue	Genes	List Total	Pop Hits	Pop Total	Fold Enrichment	Bonferroni	Benjamini	FDR
SP_PIR_KEYWORDS	s-adenosyl-l-methionine	5	0.491159	0.662422	1417702_A_AT, 1431980_A_AT, 1418697_AT, 1428582_AT, 1418701_AT	911	88	17854	1.11354	1	0.977272	100
UP_SEQ_FEATURE	binding site:S-adenosyl-L-methionine	3	0.294695	0.694125	1417702_A_AT, 1418697_AT, 1418701_AT	905	42	16021	1.26448	1	1	100
SP_PIR_KEYWORDS	methyltransferase	7	0.687623	0.736622	1421184_A_AT, 1417702_A_AT, 1431980_A_AT, 1418697_AT, 1428582_AT, 1418701_AT, 1460519_A_AT	911	142	17854	0.966111	1	0.987068	100
Annotation Cluster 198	Enrichment Score: 0.15561669678319065
Category	Term	Count	%	PValue	Genes	List Total	Pop Hits	Pop Total	Fold Enrichment	Bonferroni	Benjamini	FDR
GOTERM_BP_FAT	GO:0010627~regulation of protein kinase cascade	8	0.785855	0.611125	1416034_AT, 1417500_A_AT, 1417879_AT, 1425895_A_AT, 1416429_A_AT, 1427329_A_AT, 1449002_AT, 1427040_AT	648	155	13588	1.08228	1	0.996073	100
GOTERM_BP_FAT	GO:0010647~positive regulation of cell communication	9	0.884086	0.683386	1416034_AT, 1417500_A_AT, 1419155_A_AT, 1417879_AT, 1416967_AT, 1435272_AT, 1416429_A_AT, 1427329_A_AT, 1426285_AT	648	189	13588	0.99853	1	0.99796	100
GOTERM_BP_FAT	GO:0009967~positive regulation of signal transduction	8	0.785855	0.717095	1416034_AT, 1417500_A_AT, 1419155_A_AT, 1417879_AT, 1416967_AT, 1435272_AT, 1416429_A_AT, 1427329_A_AT	648	172	13588	0.975309	1	0.998655	100
GOTERM_BP_FAT	GO:0010740~positive regulation of protein kinase cascade	4	0.392927	0.796453	1417500_A_AT, 1417879_AT, 1416429_A_AT, 1427329_A_AT	648	88	13588	0.953143	1	0.999609	100
Annotation Cluster 199	Enrichment Score: 0.15383296781272512
Category	Term	Count	%	PValue	Genes	List Total	Pop Hits	Pop Total	Fold Enrichment	Bonferroni	Benjamini	FDR
SMART	SM00239:C2	7	0.687623	0.497691	1425338_AT, 1436426_AT, 1421594_A_AT, 1451099_AT, 1452398_AT, 1437424_AT, 1451499_AT	397	130	9131	1.23846	1	0.980251	99.9852
INTERPRO	IPR000008:C2 calcium-dependent membrane targeting	7	0.687623	0.604781	1425338_AT, 1436426_AT, 1421594_A_AT, 1451099_AT, 1452398_AT, 1437424_AT, 1451499_AT	860	130	17763	1.11217	1	0.999948	100
INTERPRO	IPR018029:C2 membrane targeting protein	4	0.392927	0.892239	1425338_AT, 1421594_A_AT, 1451099_AT, 1452398_AT	860	106	17763	0.779421	1	1	100
UP_SEQ_FEATURE	domain:C2	3	0.294695	0.902879	1436426_AT, 1452398_AT, 1451499_AT	905	68	16021	0.781004	1	1	100
Annotation Cluster 200	Enrichment Score: 0.15002748343602554
Category	Term	Count	%	PValue	Genes	List Total	Pop Hits	Pop Total	Fold Enrichment	Bonferroni	Benjamini	FDR
UP_SEQ_FEATURE	domain:VWFA	4	0.392927	0.594352	1429159_AT, 1419182_AT, 1438496_A_AT, 1417533_A_AT	905	54	16021	1.31132	1	1	100
SMART	SM00327:VWA	4	0.392927	0.741581	1429159_AT, 1419182_AT, 1438496_A_AT, 1417533_A_AT	397	88	9131	1.04545	1	0.997036	100
INTERPRO	IPR002035:von Willebrand factor, type A	4	0.392927	0.804851	1429159_AT, 1419182_AT, 1438496_A_AT, 1417533_A_AT	860	88	17763	0.938848	1	1	100
Annotation Cluster 201	Enrichment Score: 0.137678743067047
Category	Term	Count	%	PValue	Genes	List Total	Pop Hits	Pop Total	Fold Enrichment	Bonferroni	Benjamini	FDR
GOTERM_CC_FAT	GO:0005813~centrosome	10	0.982318	0.507622	1417168_A_AT, 1415923_AT, 1425745_A_AT, 1418986_A_AT, 1428293_AT, 1449000_AT, 1455558_AT, 1417788_AT, 1448643_AT, 1418003_AT	681	160	12504	1.14758	1	0.952051	99.9944
GOTERM_CC_FAT	GO:0005815~microtubule organizing center	11	1.08055	0.581888	1436426_AT, 1417168_A_AT, 1415923_AT, 1425745_A_AT, 1418986_A_AT, 1428293_AT, 1449000_AT, 1455558_AT, 1417788_AT, 1448643_AT, 1418003_AT	681	189	12504	1.06864	1	0.966228	99.9994
GOTERM_CC_FAT	GO:0044430~cytoskeletal part	32	3.14342	0.975101	1455610_AT, 1418658_AT, 1442823_AT, 1448371_AT, 1418551_AT, 1448394_AT, 1428669_AT, 1428293_AT, 1449000_AT, 1438018_AT, 1448643_AT, 1418003_AT, 1424367_A_AT, 1425338_AT, 1415923_AT, 1434180_AT, 1417168_A_AT, 1425745_A_AT, 1418986_A_AT, 1416840_AT, 1436426_AT, 1455213_AT, 1417960_AT, 1460694_S_AT, 1457465_AT, 1427735_A_AT, 1455558_AT, 1452670_AT, 1451290_AT, 1419137_AT, 1417788_AT, 1456609_AT	681	774	12504	0.759121	1	0.99996	100
GOTERM_CC_FAT	GO:0015630~microtubule cytoskeleton	17	1.66994	0.976912	1415923_AT, 1417168_A_AT, 1425745_A_AT, 1418986_A_AT, 1418658_AT, 1416840_AT, 1436426_AT, 1428669_AT, 1457218_AT, 1428293_AT, 1449000_AT, 1455558_AT, 1451290_AT, 1417788_AT, 1448643_AT, 1438018_AT, 1418003_AT	681	450	12504	0.693647	1	0.999962	100
Annotation Cluster 202	Enrichment Score: 0.1331287220336175
Category	Term	Count	%	PValue	Genes	List Total	Pop Hits	Pop Total	Fold Enrichment	Bonferroni	Benjamini	FDR
GOTERM_MF_FAT	GO:0015631~tubulin binding	5	0.491159	0.514902	1415923_AT, 1418986_A_AT, 1416713_AT, 1451290_AT, 1438018_AT	652	76	13288	1.34081	1	0.994361	99.9985
GOTERM_BP_FAT	GO:0000226~microtubule cytoskeleton organization	5	0.491159	0.780845	1425745_A_AT, 1418986_A_AT, 1416713_AT, 1455558_AT, 1438018_AT	648	111	13588	0.944556	1	0.999487	100
GOTERM_BP_FAT	GO:0007017~microtubule-based process	5	0.491159	0.991572	1425745_A_AT, 1418986_A_AT, 1416713_AT, 1455558_AT, 1438018_AT	648	211	13588	0.496899	1	1	100
Annotation Cluster 203	Enrichment Score: 0.13226095943479288
Category	Term	Count	%	PValue	Genes	List Total	Pop Hits	Pop Total	Fold Enrichment	Bonferroni	Benjamini	FDR
SMART	SM00133:S_TK_X	3	0.294695	0.676301	1444232_AT, 1436197_AT, 1416041_AT	397	53	9131	1.30189	1	0.994744	99.9999
INTERPRO	IPR000961:AGC-kinase, C-terminal	3	0.294695	0.733468	1444232_AT, 1436197_AT, 1416041_AT	860	53	17763	1.16913	1	0.999997	100
UP_SEQ_FEATURE	domain:AGC-kinase C-terminal	3	0.294695	0.80853	1444232_AT, 1436197_AT, 1416041_AT	905	53	16021	1.00204	1	1	100
Annotation Cluster 204	Enrichment Score: 0.12532317619394917
Category	Term	Count	%	PValue	Genes	List Total	Pop Hits	Pop Total	Fold Enrichment	Bonferroni	Benjamini	FDR
GOTERM_BP_FAT	GO:0015837~amine transport	5	0.491159	0.643893	1416526_A_AT, 1426714_AT, 1417639_AT, 1428440_AT, 1424562_A_AT	648	92	13588	1.13963	1	0.997067	100
GOTERM_BP_FAT	GO:0006865~amino acid transport	4	0.392927	0.663765	1426714_AT, 1417639_AT, 1428440_AT, 1424562_A_AT	648	71	13588	1.18136	1	0.997428	100
GOTERM_BP_FAT	GO:0046942~carboxylic acid transport	4	0.392927	0.856592	1426714_AT, 1417639_AT, 1428440_AT, 1424562_A_AT	648	99	13588	0.847238	1	0.999873	100
GOTERM_BP_FAT	GO:0015849~organic acid transport	4	0.392927	0.861203	1426714_AT, 1417639_AT, 1428440_AT, 1424562_A_AT	648	100	13588	0.838765	1	0.999887	100
Annotation Cluster 205	Enrichment Score: 0.1248479632588462
Category	Term	Count	%	PValue	Genes	List Total	Pop Hits	Pop Total	Fold Enrichment	Bonferroni	Benjamini	FDR
GOTERM_BP_FAT	GO:0033673~negative regulation of kinase activity	3	0.294695	0.705695	1453851_A_AT, 1420858_AT, 1423135_AT	648	51	13588	1.23348	1	0.998542	100
GOTERM_BP_FAT	GO:0006469~negative regulation of protein kinase activity	3	0.294695	0.705695	1453851_A_AT, 1420858_AT, 1423135_AT	648	51	13588	1.23348	1	0.998542	100
GOTERM_BP_FAT	GO:0051348~negative regulation of transferase activity	3	0.294695	0.725601	1453851_A_AT, 1420858_AT, 1423135_AT	648	53	13588	1.18693	1	0.998803	100
GOTERM_BP_FAT	GO:0044092~negative regulation of molecular function	6	0.589391	0.759397	1453851_A_AT, 1427126_AT, 1452388_AT, 1420858_AT, 1423135_AT, 1416429_A_AT, 1427048_AT	648	132	13588	0.953143	1	0.999262	100
GOTERM_BP_FAT	GO:0043086~negative regulation of catalytic activity	4	0.392927	0.865683	1453851_A_AT, 1427126_AT, 1452388_AT, 1420858_AT, 1423135_AT	648	101	13588	0.830461	1	0.999896	100
Annotation Cluster 206	Enrichment Score: 0.12464286092319359
Category	Term	Count	%	PValue	Genes	List Total	Pop Hits	Pop Total	Fold Enrichment	Bonferroni	Benjamini	FDR
GOTERM_BP_FAT	GO:0006793~phosphorus metabolic process	46	4.51866	0.295746	1444232_AT, 1448292_AT, 1416330_AT, 1426850_A_AT, 1449283_A_AT, 1417273_AT, 1437869_AT, 1427486_AT, 1455450_AT, 1435294_AT, 1436197_AT, 1424544_AT, 1422673_AT, 1460644_AT, 1455091_AT, 1416020_A_AT, 1448211_AT, 1427282_A_AT, 1423389_AT, 1416041_AT, 1427040_AT, 1435510_AT, 1416204_AT, 1453851_A_AT, 1426640_S_AT, 1424364_A_AT, 1418052_AT, 1435699_AT, 1438684_AT, 1423062_AT, 1437122_AT, 1425620_AT, 1…	648	866	13588	1.11383	1	0.939489	99.7905
GOTERM_BP_FAT	GO:0006796~phosphate metabolic process	46	4.51866	0.295746	1444232_AT, 1448292_AT, 1416330_AT, 1426850_A_AT, 1449283_A_AT, 1417273_AT, 1437869_AT, 1427486_AT, 1455450_AT, 1435294_AT, 1436197_AT, 1424544_AT, 1422673_AT, 1460644_AT, 1455091_AT, 1416020_A_AT, 1448211_AT, 1427282_A_AT, 1423389_AT, 1416041_AT, 1427040_AT, 1435510_AT, 1416204_AT, 1453851_A_AT, 1426640_S_AT, 1424364_A_AT, 1418052_AT, 1435699_AT, 1438684_AT, 1423062_AT, 1437122_AT, 1425620_AT, 1…	648	866	13588	1.11383	1	0.939489	99.7905
GOTERM_BP_FAT	GO:0016310~phosphorylation	37	3.63458	0.39705	1444232_AT, 1448292_AT, 1416330_AT, 1426850_A_AT, 1449283_A_AT, 1417273_AT, 1436197_AT, 1424544_AT, 1422673_AT, 1460644_AT, 1416020_A_AT, 1448211_AT, 1427282_A_AT, 1423389_AT, 1416041_AT, 1427040_AT, 1453851_A_AT, 1426640_S_AT, 1424364_A_AT, 1418052_AT, 1438684_AT, 1423062_AT, 1437122_AT, 1425620_AT, 1448825_AT, 1452398_AT, 1425678_A_AT, 1418788_AT, 1429463_AT, 1450852_S_AT, 1421340_AT, 1423978_A…	648	718	13588	1.08058	1	0.973503	99.9864
SMART	SM00220:S_TKc	12	1.17878	0.603674	1429463_AT, 1444232_AT, 1436197_AT, 1422673_AT, 1426850_A_AT, 1449283_A_AT, 1423452_AT, 1421340_AT, 1423978_AT, 1438684_AT, 1425678_A_AT, 1416041_AT	397	265	9131	1.04151	1	0.987676	99.9993
GOTERM_BP_FAT	GO:0006468~protein amino acid phosphorylation	30	2.94695	0.637835	1444232_AT, 1416330_AT, 1426850_A_AT, 1449283_A_AT, 1417273_AT, 1436197_AT, 1424544_AT, 1422673_AT, 1460644_AT, 1423389_AT, 1416041_AT, 1427040_AT, 1453851_A_AT, 1426640_S_AT, 1438684_AT, 1423062_AT, 1437122_AT, 1448825_AT, 1452398_AT, 1425620_AT, 1425678_A_AT, 1418788_AT, 1429463_AT, 1450852_S_AT, 1423978_AT, 1421340_AT, 1423452_AT, 1430640_A_AT, 1427329_A_AT, 1427191_AT	648	640	13588	0.982928	1	0.996943	100
INTERPRO	IPR002290:Serine/threonine protein kinase	12	1.17878	0.740249	1429463_AT, 1444232_AT, 1436197_AT, 1422673_AT, 1426850_A_AT, 1449283_A_AT, 1423452_AT, 1421340_AT, 1423978_AT, 1438684_AT, 1425678_A_AT, 1416041_AT	860	265	17763	0.935305	1	0.999997	100
INTERPRO	IPR017442:Serine/threonine protein kinase-related	14	1.37525	0.919003	1444232_AT, 1426640_S_AT, 1426850_A_AT, 1449283_A_AT, 1438684_AT, 1425678_A_AT, 1429463_AT, 1436197_AT, 1422673_AT, 1423452_AT, 1421340_AT, 1423978_AT, 1416041_AT, 1427191_AT	860	374	17763	0.773169	1	1	100
GOTERM_MF_FAT	GO:0004672~protein kinase activity	22	2.1611	0.948468	1444232_AT, 1426640_S_AT, 1426850_A_AT, 1449283_A_AT, 1438684_AT, 1417273_AT, 1448825_AT, 1425620_AT, 1425678_A_AT, 1418788_AT, 1455450_AT, 1429463_AT, 1436197_AT, 1424544_AT, 1422673_AT, 1460644_AT, 1421340_AT, 1423978_AT, 1423452_AT, 1428296_AT, 1416041_AT, 1427191_AT	652	583	13288	0.76907	1	1	100
INTERPRO	IPR008271:Serine/threonine protein kinase, active site	12	1.17878	0.964364	1429463_AT, 1444232_AT, 1436197_AT, 1422673_AT, 1426850_A_AT, 1449283_A_AT, 1423452_AT, 1421340_AT, 1423978_AT, 1438684_AT, 1425678_A_AT, 1416041_AT	860	360	17763	0.688488	1	1	100
SP_PIR_KEYWORDS	kinase	27	2.65226	0.971669	1444232_AT, 1426850_A_AT, 1449283_A_AT, 1435272_AT, 1416995_AT, 1417273_AT, 1422743_AT, 1423717_AT, 1455450_AT, 1416395_AT, 1436197_AT, 1422673_AT, 1417649_AT, 1460644_AT, 1420858_AT, 1416041_AT, 1418052_AT, 1448905_AT, 1438684_AT, 1448825_AT, 1425678_A_AT, 1418788_AT, 1429463_AT, 1423978_AT, 1423452_AT, 1421340_AT, 1418715_AT	911	707	17854	0.748448	1	0.999911	100
GOTERM_MF_FAT	GO:0004674~protein serine/threonine kinase activity	14	1.37525	0.975315	1444232_AT, 1426850_A_AT, 1449283_A_AT, 1438684_AT, 1425620_AT, 1425678_A_AT, 1429463_AT, 1436197_AT, 1422673_AT, 1460644_AT, 1423452_AT, 1421340_AT, 1423978_AT, 1416041_AT	652	421	13288	0.677732	1	1	100
SP_PIR_KEYWORDS	serine/threonine-protein kinase	12	1.17878	0.988793	1429463_AT, 1444232_AT, 1436197_AT, 1422673_AT, 1426850_A_AT, 1449283_A_AT, 1423452_AT, 1421340_AT, 1423978_AT, 1438684_AT, 1425678_A_AT, 1416041_AT	911	384	17854	0.612445	1	0.999985	100
INTERPRO	IPR000719:Protein kinase, core	15	1.47348	0.990151	1444232_AT, 1426640_S_AT, 1426850_A_AT, 1449283_A_AT, 1438684_AT, 1425678_A_AT, 1418788_AT, 1429463_AT, 1436197_AT, 1422673_AT, 1423978_AT, 1423452_AT, 1421340_AT, 1416041_AT, 1427191_AT	860	491	17763	0.630997	1	1	100
UP_SEQ_FEATURE	binding site:ATP	20	1.96464	0.992968	1444232_AT, 1426850_A_AT, 1449283_A_AT, 1418052_AT, 1448905_AT, 1438684_AT, 1417273_AT, 1448825_AT, 1416383_A_AT, 1425678_A_AT, 1418788_AT, 1460257_A_AT, 1429463_AT, 1436197_AT, 1422673_AT, 1421340_AT, 1423978_AT, 1423452_AT, 1447577_X_AT, 1416041_AT	905	545	16021	0.649643	1	1	100
INTERPRO	IPR017441:Protein kinase, ATP binding site	13	1.27701	0.995656	1444232_AT, 1426850_A_AT, 1449283_A_AT, 1438684_AT, 1425678_A_AT, 1418788_AT, 1429463_AT, 1436197_AT, 1422673_AT, 1423452_AT, 1421340_AT, 1423978_AT, 1416041_AT	860	467	17763	0.574969	1	1	100
UP_SEQ_FEATURE	domain:Protein kinase	16	1.57171	0.996336	1444232_AT, 1426640_S_AT, 1426850_A_AT, 1449283_A_AT, 1438684_AT, 1425678_A_AT, 1418788_AT, 1429463_AT, 1436197_AT, 1424544_AT, 1422673_AT, 1423978_AT, 1421340_AT, 1423452_AT, 1416041_AT, 1427191_AT	905	476	16021	0.595051	1	1	100
UP_SEQ_FEATURE	nucleotide phosphate-binding region:ATP	26	2.55403	0.999993	1444232_AT, 1424829_AT, 1451541_AT, 1426850_A_AT, 1449283_A_AT, 1417273_AT, 1416395_AT, 1436197_AT, 1422673_AT, 1416679_AT, 1416788_A_AT, 1422627_A_AT, 1416041_AT, 1418052_AT, 1438684_AT, 1417639_AT, 1448825_AT, 1416214_AT, 1425678_A_AT, 1418788_AT, 1460257_A_AT, 1429463_AT, 1423452_AT, 1421340_AT, 1423978_AT, 1437745_AT	905	907	16021	0.507466	1	1	100
Annotation Cluster 207	Enrichment Score: 0.12096865741149668
Category	Term	Count	%	PValue	Genes	List Total	Pop Hits	Pop Total	Fold Enrichment	Bonferroni	Benjamini	FDR
GOTERM_MF_FAT	GO:0003713~transcription coactivator activity	5	0.491159	0.728529	1449945_AT, 1454987_A_AT, 1418713_AT, 1425806_A_AT, 1417817_A_AT	652	100	13288	1.01902	1	0.999644	100
GOTERM_MF_FAT	GO:0008134~transcription factor binding	13	1.27701	0.758333	1424596_S_AT, 1418713_AT, 1418982_AT, 1417817_A_AT, 1437122_AT, 1435436_AT, 1420619_A_AT, 1449945_AT, 1454987_A_AT, 1425806_A_AT, 1423176_AT, 1416630_AT, 1427040_AT	652	288	13288	0.919947	1	0.999761	100
GOTERM_MF_FAT	GO:0003712~transcription cofactor activity	8	0.785855	0.784851	1424596_S_AT, 1420619_A_AT, 1449945_AT, 1454987_A_AT, 1418713_AT, 1425806_A_AT, 1423176_AT, 1417817_A_AT	652	180	13288	0.905794	1	0.999834	100
Annotation Cluster 208	Enrichment Score: 0.12044300727944791
Category	Term	Count	%	PValue	Genes	List Total	Pop Hits	Pop Total	Fold Enrichment	Bonferroni	Benjamini	FDR
GOTERM_BP_FAT	GO:0044057~regulation of system process	11	1.08055	0.489667	1425546_A_AT, 1450852_S_AT, 1428662_A_AT, 1417960_AT, 1427465_AT, 1435436_AT, 1423389_AT, 1417788_AT, 1426285_AT, 1415800_AT, 1418551_AT	648	201	13588	1.14756	1	0.987873	99.9993
GOTERM_BP_FAT	GO:0031644~regulation of neurological system process	5	0.491159	0.792481	1425546_A_AT, 1450852_S_AT, 1417960_AT, 1417788_AT, 1426285_AT	648	113	13588	0.927838	1	0.999583	100
GOTERM_BP_FAT	GO:0051969~regulation of transmission of nerve impulse	4	0.392927	0.889981	1425546_A_AT, 1417960_AT, 1417788_AT, 1426285_AT	648	107	13588	0.783893	1	0.999946	100
GOTERM_BP_FAT	GO:0050804~regulation of synaptic transmission	3	0.294695	0.954899	1417960_AT, 1417788_AT, 1426285_AT	648	100	13588	0.629074	1	0.999998	100
Annotation Cluster 209	Enrichment Score: 0.117823848994436
Category	Term	Count	%	PValue	Genes	List Total	Pop Hits	Pop Total	Fold Enrichment	Bonferroni	Benjamini	FDR
GOTERM_BP_FAT	GO:0042060~wound healing	7	0.687623	0.443856	1417018_AT, 1421287_A_AT, 1450852_S_AT, 1419088_AT, 1416625_AT, 1441281_S_AT, 1415800_AT	648	112	13588	1.31057	1	0.981665	99.9967
GOTERM_BP_FAT	GO:0007596~blood coagulation	3	0.294695	0.852775	1417018_AT, 1450852_S_AT, 1416625_AT	648	70	13588	0.898677	1	0.999862	100
GOTERM_BP_FAT	GO:0050817~coagulation	3	0.294695	0.852775	1417018_AT, 1450852_S_AT, 1416625_AT	648	70	13588	0.898677	1	0.999862	100
GOTERM_BP_FAT	GO:0007599~hemostasis	3	0.294695	0.858254	1417018_AT, 1450852_S_AT, 1416625_AT	648	71	13588	0.88602	1	0.999878	100
GOTERM_BP_FAT	GO:0050878~regulation of body fluid levels	3	0.294695	0.929725	1417018_AT, 1450852_S_AT, 1416625_AT	648	89	13588	0.706825	1	0.999989	100
Annotation Cluster 210	Enrichment Score: 0.11735134834608692
Category	Term	Count	%	PValue	Genes	List Total	Pop Hits	Pop Total	Fold Enrichment	Bonferroni	Benjamini	FDR
GOTERM_BP_FAT	GO:0030030~cell projection organization	16	1.57171	0.557966	1444232_AT, 1447863_S_AT, 1415923_AT, 1417307_AT, 1417574_AT, 1424826_S_AT, 1418288_AT, 1418626_A_AT, 1417817_A_AT, 1437122_AT, 1448507_AT, 1436426_AT, 1416034_AT, 1422444_AT, 1453103_AT, 1422627_A_AT, 1442376_AT	648	319	13588	1.05174	1	0.993379	99.9999
GOTERM_BP_FAT	GO:0030182~neuron differentiation	19	1.8664	0.628326	1447863_S_AT, 1444232_AT, 1415923_AT, 1417307_AT, 1417574_AT, 1418626_A_AT, 1437122_AT, 1448507_AT, 1422912_AT, 1432372_A_AT, 1416034_AT, 1417649_AT, 1420583_A_AT, 1416967_AT, 1453103_AT, 1423135_AT, 1416630_AT, 1417193_AT, 1427048_AT, 1442376_AT	648	399	13588	0.99853	1	0.996594	100
GOTERM_BP_FAT	GO:0048666~neuron development	14	1.37525	0.638717	1444232_AT, 1447863_S_AT, 1415923_AT, 1417307_AT, 1417574_AT, 1418626_A_AT, 1437122_AT, 1448507_AT, 1432372_A_AT, 1416034_AT, 1417649_AT, 1453103_AT, 1423135_AT, 1417193_AT, 1442376_AT	648	292	13588	1.00537	1	0.996902	100
GOTERM_BP_FAT	GO:0032989~cellular component morphogenesis	16	1.57171	0.704209	1447863_S_AT, 1415923_AT, 1417574_AT, 1417307_AT, 1418626_A_AT, 1417817_A_AT, 1437122_AT, 1418551_AT, 1432372_A_AT, 1426018_A_AT, 1448394_AT, 1453103_AT, 1425895_A_AT, 1457465_AT, 1427735_A_AT, 1422627_A_AT, 1442376_AT	648	351	13588	0.955858	1	0.998523	100
GOTERM_BP_FAT	GO:0031175~neuron projection development	10	0.982318	0.716353	1444232_AT, 1447863_S_AT, 1416034_AT, 1415923_AT, 1417307_AT, 1417574_AT, 1453103_AT, 1418626_A_AT, 1437122_AT, 1448507_AT, 1442376_AT	648	218	13588	0.961887	1	0.998656	100
GOTERM_BP_FAT	GO:0048858~cell projection morphogenesis	9	0.884086	0.751798	1447863_S_AT, 1415923_AT, 1417307_AT, 1417574_AT, 1453103_AT, 1417817_A_AT, 1418626_A_AT, 1437122_AT, 1422627_A_AT, 1442376_AT	648	202	13588	0.934268	1	0.999174	100
GOTERM_BP_FAT	GO:0032990~cell part morphogenesis	9	0.884086	0.796874	1447863_S_AT, 1415923_AT, 1417307_AT, 1417574_AT, 1453103_AT, 1417817_A_AT, 1418626_A_AT, 1437122_AT, 1422627_A_AT, 1442376_AT	648	212	13588	0.890199	1	0.999607	100
GOTERM_BP_FAT	GO:0000902~cell morphogenesis	13	1.27701	0.80499	1447863_S_AT, 1415923_AT, 1417574_AT, 1417307_AT, 1418626_A_AT, 1417817_A_AT, 1437122_AT, 1432372_A_AT, 1426018_A_AT, 1453103_AT, 1425895_A_AT, 1457465_AT, 1422627_A_AT, 1442376_AT	648	309	13588	0.882197	1	0.999657	100
GOTERM_BP_FAT	GO:0048812~neuron projection morphogenesis	7	0.687623	0.849353	1447863_S_AT, 1415923_AT, 1417307_AT, 1417574_AT, 1453103_AT, 1418626_A_AT, 1437122_AT, 1442376_AT	648	176	13588	0.834	1	0.999861	100
GOTERM_BP_FAT	GO:0048667~cell morphogenesis involved in neuron differentiation	6	0.589391	0.938402	1447863_S_AT, 1415923_AT, 1417574_AT, 1453103_AT, 1437122_AT, 1442376_AT, 1432372_A_AT	648	182	13588	0.69129	1	0.999993	100
GOTERM_BP_FAT	GO:0000904~cell morphogenesis involved in differentiation	7	0.687623	0.942174	1447863_S_AT, 1415923_AT, 1417574_AT, 1453103_AT, 1425895_A_AT, 1437122_AT, 1442376_AT, 1432372_A_AT	648	212	13588	0.692377	1	0.999995	100
GOTERM_BP_FAT	GO:0007409~axonogenesis	5	0.491159	0.954915	1447863_S_AT, 1415923_AT, 1417574_AT, 1453103_AT, 1437122_AT, 1442376_AT	648	163	13588	0.643225	1	0.999997	100
Annotation Cluster 211	Enrichment Score: 0.10708650589387661
Category	Term	Count	%	PValue	Genes	List Total	Pop Hits	Pop Total	Fold Enrichment	Bonferroni	Benjamini	FDR
SP_PIR_KEYWORDS	lysosome	7	0.687623	0.748673	1419595_A_AT, 1449130_AT, 1430135_AT, 1451019_AT, 1424671_AT, 1448621_A_AT, 1418365_AT	911	144	17854	0.952692	1	0.987409	100
GOTERM_CC_FAT	GO:0005764~lysosome	9	0.884086	0.75886	1417426_AT, 1419595_A_AT, 1435290_X_AT, 1449130_AT, 1430135_AT, 1451019_AT, 1424671_AT, 1448621_A_AT, 1418365_AT	681	178	12504	0.928377	1	0.994206	100
GOTERM_CC_FAT	GO:0000323~lytic vacuole	9	0.884086	0.764245	1417426_AT, 1419595_A_AT, 1435290_X_AT, 1449130_AT, 1430135_AT, 1451019_AT, 1424671_AT, 1448621_A_AT, 1418365_AT	681	179	12504	0.923191	1	0.994102	100
GOTERM_CC_FAT	GO:0005773~vacuole	10	0.982318	0.785917	1417426_AT, 1419595_A_AT, 1435290_X_AT, 1449130_AT, 1430135_AT, 1451019_AT, 1424671_AT, 1448621_A_AT, 1451290_AT, 1418365_AT	681	204	12504	0.90006	1	0.99559	100
KEGG_PATHWAY	mmu04142:Lysosome	5	0.491159	0.854091	1451665_A_AT, 1430135_AT, 1451019_AT, 1448621_A_AT, 1418365_AT	288	119	5738	0.837127	1	0.984419	100
Annotation Cluster 212	Enrichment Score: 0.10510505563745612
Category	Term	Count	%	PValue	Genes	List Total	Pop Hits	Pop Total	Fold Enrichment	Bonferroni	Benjamini	FDR
GOTERM_BP_FAT	GO:0000122~negative regulation of transcription from RNA polymerase II promoter	13	1.27701	0.422975	1424596_S_AT, 1428662_A_AT, 1418982_AT, 1417817_A_AT, 1426018_A_AT, 1418157_AT, 1417649_AT, 1416967_AT, 1425895_A_AT, 1420858_AT, 1416630_AT, 1415996_AT, 1417728_AT	648	231	13588	1.18008	1	0.978364	99.9937
GOTERM_BP_FAT	GO:0045892~negative regulation of transcription, DNA-dependent	14	1.37525	0.712221	1424596_S_AT, 1428662_A_AT, 1428915_AT, 1418982_AT, 1417817_A_AT, 1426018_A_AT, 1418157_AT, 1417649_AT, 1416967_AT, 1425895_A_AT, 1420858_AT, 1416630_AT, 1415996_AT, 1417728_AT	648	308	13588	0.953143	1	0.99861	100
GOTERM_BP_FAT	GO:0051253~negative regulation of RNA metabolic process	14	1.37525	0.720725	1424596_S_AT, 1428662_A_AT, 1428915_AT, 1418982_AT, 1417817_A_AT, 1426018_A_AT, 1418157_AT, 1417649_AT, 1416967_AT, 1425895_A_AT, 1420858_AT, 1416630_AT, 1415996_AT, 1417728_AT	648	310	13588	0.946993	1	0.998725	100
GOTERM_BP_FAT	GO:0010629~negative regulation of gene expression	17	1.66994	0.827677	1424596_S_AT, 1428662_A_AT, 1428915_AT, 1418982_AT, 1417817_A_AT, 1422912_AT, 1426018_A_AT, 1420619_A_AT, 1418157_AT, 1417649_AT, 1416967_AT, 1425895_A_AT, 1420858_AT, 1416630_AT, 1422470_AT, 1415996_AT, 1417728_AT	648	410	13588	0.869452	1	0.999774	100
GOTERM_BP_FAT	GO:0010605~negative regulation of macromolecule metabolic process	21	2.06287	0.835744	1424596_S_AT, 1428662_A_AT, 1428915_AT, 1416625_AT, 1418982_AT, 1417817_A_AT, 1423062_AT, 1422912_AT, 1426018_A_AT, 1418318_AT, 1420619_A_AT, 1417649_AT, 1418157_AT, 1416967_AT, 1425895_A_AT, 1420858_AT, 1416630_AT, 1422470_AT, 1415996_AT, 1417728_AT, 1438936_S_AT	648	506	13588	0.870261	1	0.999814	100
GOTERM_BP_FAT	GO:0010558~negative regulation of macromolecule biosynthetic process	17	1.66994	0.848729	1424596_S_AT, 1428662_A_AT, 1428915_AT, 1418982_AT, 1417817_A_AT, 1426018_A_AT, 1418318_AT, 1420619_A_AT, 1418157_AT, 1417649_AT, 1416967_AT, 1425895_A_AT, 1420858_AT, 1416630_AT, 1415996_AT, 1417728_AT, 1438936_S_AT	648	418	13588	0.852812	1	0.999863	100
GOTERM_BP_FAT	GO:0016481~negative regulation of transcription	15	1.47348	0.852042	1424596_S_AT, 1428662_A_AT, 1428915_AT, 1418982_AT, 1417817_A_AT, 1426018_A_AT, 1420619_A_AT, 1418157_AT, 1417649_AT, 1416967_AT, 1425895_A_AT, 1420858_AT, 1416630_AT, 1415996_AT, 1417728_AT	648	372	13588	0.84553	1	0.999866	100
GOTERM_BP_FAT	GO:0031327~negative regulation of cellular biosynthetic process	17	1.66994	0.876567	1424596_S_AT, 1428662_A_AT, 1428915_AT, 1418982_AT, 1417817_A_AT, 1426018_A_AT, 1418318_AT, 1420619_A_AT, 1418157_AT, 1417649_AT, 1416967_AT, 1425895_A_AT, 1420858_AT, 1416630_AT, 1415996_AT, 1417728_AT, 1438936_S_AT	648	430	13588	0.829012	1	0.99992	100
GOTERM_BP_FAT	GO:0009890~negative regulation of biosynthetic process	17	1.66994	0.884896	1424596_S_AT, 1428662_A_AT, 1428915_AT, 1418982_AT, 1417817_A_AT, 1426018_A_AT, 1418318_AT, 1420619_A_AT, 1418157_AT, 1417649_AT, 1416967_AT, 1425895_A_AT, 1420858_AT, 1416630_AT, 1415996_AT, 1417728_AT, 1438936_S_AT	648	434	13588	0.821372	1	0.999937	100
GOTERM_BP_FAT	GO:0045934~negative regulation of nucleobase, nucleoside, nucleotide and nucleic acid metabolic process	15	1.47348	0.906747	1424596_S_AT, 1428662_A_AT, 1428915_AT, 1418982_AT, 1417817_A_AT, 1426018_A_AT, 1420619_A_AT, 1418157_AT, 1417649_AT, 1416967_AT, 1425895_A_AT, 1420858_AT, 1416630_AT, 1415996_AT, 1417728_AT	648	397	13588	0.792285	1	0.999969	100
GOTERM_BP_FAT	GO:0051172~negative regulation of nitrogen compound metabolic process	15	1.47348	0.913727	1424596_S_AT, 1428662_A_AT, 1428915_AT, 1418982_AT, 1417817_A_AT, 1426018_A_AT, 1420619_A_AT, 1418157_AT, 1417649_AT, 1416967_AT, 1425895_A_AT, 1420858_AT, 1416630_AT, 1415996_AT, 1417728_AT	648	401	13588	0.784382	1	0.999976	100
Annotation Cluster 213	Enrichment Score: 0.10407713572256914
Category	Term	Count	%	PValue	Genes	List Total	Pop Hits	Pop Total	Fold Enrichment	Bonferroni	Benjamini	FDR
GOTERM_BP_FAT	GO:0016044~membrane organization	13	1.27701	0.648789	1439496_AT, 1424223_AT, 1428636_AT, 1424671_AT, 1437122_AT, 1416995_AT, 1416034_AT, 1447520_AT, 1417962_S_AT, 1420911_A_AT, 1419667_AT, 1422470_AT, 1417900_A_AT	648	272	13588	1.0022	1	0.997213	100
GOTERM_BP_FAT	GO:0010324~membrane invagination	8	0.785855	0.797317	1439496_AT, 1416034_AT, 1447520_AT, 1420911_A_AT, 1417962_S_AT, 1428636_AT, 1416995_AT, 1417900_A_AT	648	188	13588	0.892304	1	0.999605	100
GOTERM_BP_FAT	GO:0006897~endocytosis	8	0.785855	0.797317	1439496_AT, 1416034_AT, 1447520_AT, 1420911_A_AT, 1417962_S_AT, 1428636_AT, 1416995_AT, 1417900_A_AT	648	188	13588	0.892304	1	0.999605	100
GOTERM_BP_FAT	GO:0016192~vesicle-mediated transport	19	1.8664	0.851317	1439496_AT, 1430522_A_AT, 1451665_A_AT, 1428636_AT, 1415812_AT, 1416995_AT, 1418455_AT, 1448979_AT, 1421862_A_AT, 1425749_AT, 1416034_AT, 1447520_AT, 1417962_S_AT, 1420911_A_AT, 1421594_A_AT, 1427329_A_AT, 1438018_AT, 1417900_A_AT, 1451499_AT	648	466	13588	0.854965	1	0.999867	100
SP_PIR_KEYWORDS	Endocytosis	4	0.392927	0.859325	1439496_AT, 1417962_S_AT, 1416995_AT, 1417900_A_AT	911	93	17854	0.842935	1	0.996994	100
Annotation Cluster 214	Enrichment Score: 0.10072387166849962
Category	Term	Count	%	PValue	Genes	List Total	Pop Hits	Pop Total	Fold Enrichment	Bonferroni	Benjamini	FDR
GOTERM_MF_FAT	GO:0032561~guanyl ribonucleotide binding	17	1.66994	0.704923	1444232_AT, 1418240_AT, 1456061_AT, 1418341_AT, 1423854_A_AT, 1449383_AT, 1427510_AT, 1423717_AT, 1427891_AT, 1444028_S_AT, 1417500_A_AT, 1418892_AT, 1449009_AT, 1431164_AT, 1424374_AT, 1427918_A_AT, 1427191_AT	652	363	13288	0.954453	1	0.999471	100
GOTERM_MF_FAT	GO:0019001~guanyl nucleotide binding	17	1.66994	0.704923	1444232_AT, 1418240_AT, 1456061_AT, 1418341_AT, 1423854_A_AT, 1449383_AT, 1427510_AT, 1423717_AT, 1427891_AT, 1444028_S_AT, 1417500_A_AT, 1418892_AT, 1449009_AT, 1431164_AT, 1424374_AT, 1427918_A_AT, 1427191_AT	652	363	13288	0.954453	1	0.999471	100
GOTERM_MF_FAT	GO:0005525~GTP binding	16	1.57171	0.755454	1418240_AT, 1456061_AT, 1418341_AT, 1423854_A_AT, 1449383_AT, 1427510_AT, 1423717_AT, 1427891_AT, 1444028_S_AT, 1417500_A_AT, 1418892_AT, 1449009_AT, 1431164_AT, 1424374_AT, 1427918_A_AT, 1427191_AT	652	354	13288	0.921147	1	0.999758	100
SP_PIR_KEYWORDS	gtp-binding	13	1.27701	0.879289	1418240_AT, 1456061_AT, 1418341_AT, 1423854_A_AT, 1449383_AT, 1427510_AT, 1423717_AT, 1427891_AT, 1418892_AT, 1431164_AT, 1424374_AT, 1427918_A_AT, 1427191_AT	911	313	17854	0.813985	1	0.99767	100
UP_SEQ_FEATURE	nucleotide phosphate-binding region:GTP	11	1.08055	0.950074	1418240_AT, 1456061_AT, 1423854_A_AT, 1418341_AT, 1449383_AT, 1418892_AT, 1431164_AT, 1424374_AT, 1423717_AT, 1427891_AT, 1427918_A_AT	905	274	16021	0.710695	1	1	100
Annotation Cluster 215	Enrichment Score: 0.08990006074720783
Category	Term	Count	%	PValue	Genes	List Total	Pop Hits	Pop Total	Fold Enrichment	Bonferroni	Benjamini	FDR
SMART	SM00353:HLH	5	0.491159	0.715602	1426690_A_AT, 1425895_A_AT, 1416301_A_AT, 1416630_AT, 1435436_AT	397	111	9131	1.03604	1	0.99638	100
INTERPRO	IPR001092:Basic helix-loop-helix dimerisation region bHLH	5	0.491159	0.790776	1426690_A_AT, 1425895_A_AT, 1416301_A_AT, 1416630_AT, 1435436_AT	860	111	17763	0.93039	1	1	100
UP_SEQ_FEATURE	domain:Helix-loop-helix motif	4	0.392927	0.949675	1426690_A_AT, 1425895_A_AT, 1416630_AT, 1435436_AT	905	109	16021	0.649643	1	1	100
Annotation Cluster 216	Enrichment Score: 0.08935542801757054
Category	Term	Count	%	PValue	Genes	List Total	Pop Hits	Pop Total	Fold Enrichment	Bonferroni	Benjamini	FDR
GOTERM_MF_FAT	GO:0003714~transcription corepressor activity	4	0.392927	0.691945	1424596_S_AT, 1420619_A_AT, 1423176_AT, 1417817_A_AT	652	72	13288	1.13224	1	0.999383	100
GOTERM_MF_FAT	GO:0003712~transcription cofactor activity	8	0.785855	0.784851	1424596_S_AT, 1420619_A_AT, 1449945_AT, 1454987_A_AT, 1418713_AT, 1425806_A_AT, 1423176_AT, 1417817_A_AT	652	180	13288	0.905794	1	0.999834	100
GOTERM_MF_FAT	GO:0016564~transcription repressor activity	5	0.491159	0.993287	1424596_S_AT, 1428662_A_AT, 1420619_A_AT, 1423176_AT, 1417817_A_AT	652	211	13288	0.482947	1	1	100
Annotation Cluster 217	Enrichment Score: 0.07625567520886281
Category	Term	Count	%	PValue	Genes	List Total	Pop Hits	Pop Total	Fold Enrichment	Bonferroni	Benjamini	FDR
GOTERM_BP_FAT	GO:0007281~germ cell development	6	0.589391	0.529532	1457218_AT, 1417574_AT, 1437122_AT, 1422627_A_AT, 1438018_AT, 1422912_AT	648	101	13588	1.24569	1	0.991063	99.9998
GOTERM_BP_FAT	GO:0007286~spermatid development	3	0.294695	0.778582	1457218_AT, 1422627_A_AT, 1438018_AT	648	59	13588	1.06623	1	0.999468	100
GOTERM_BP_FAT	GO:0048515~spermatid differentiation	3	0.294695	0.808728	1457218_AT, 1422627_A_AT, 1438018_AT	648	63	13588	0.99853	1	0.999683	100
GOTERM_BP_FAT	GO:0003006~reproductive developmental process	11	1.08055	0.813028	1450716_AT, 1457218_AT, 1417574_AT, 1416967_AT, 1419519_AT, 1433891_AT, 1437122_AT, 1437745_AT, 1422627_A_AT, 1438018_AT, 1422912_AT	648	264	13588	0.873714	1	0.999702	100
GOTERM_BP_FAT	GO:0019953~sexual reproduction	16	1.57171	0.825879	1429735_AT, 1427126_AT, 1427985_AT, 1417574_AT, 1417635_AT, 1437122_AT, 1452141_A_AT, 1422912_AT, 1450716_AT, 1449534_AT, 1457218_AT, 1420911_A_AT, 1452388_AT, 1431199_AT, 1422627_A_AT, 1438018_AT, 1416408_AT	648	386	13588	0.869187	1	0.999767	100
GOTERM_BP_FAT	GO:0048610~reproductive cellular process	7	0.687623	0.837834	1457218_AT, 1417574_AT, 1417635_AT, 1437122_AT, 1422627_A_AT, 1438018_AT, 1422912_AT	648	173	13588	0.848462	1	0.999822	100
GOTERM_BP_FAT	GO:0007276~gamete generation	13	1.27701	0.869919	1429735_AT, 1427126_AT, 1427985_AT, 1417574_AT, 1437122_AT, 1422912_AT, 1450716_AT, 1449534_AT, 1457218_AT, 1431199_AT, 1452388_AT, 1422627_A_AT, 1438018_AT, 1416408_AT	648	331	13588	0.823561	1	0.999906	100
SP_PIR_KEYWORDS	spermatogenesis	5	0.491159	0.878672	1427126_AT, 1457218_AT, 1452388_AT, 1431199_AT, 1418626_A_AT, 1438018_AT	911	123	17854	0.796677	1	0.997725	100
GOTERM_BP_FAT	GO:0048609~reproductive process in a multicellular organism	14	1.37525	0.95688	1429735_AT, 1427126_AT, 1427985_AT, 1417574_AT, 1437122_AT, 1422912_AT, 1439096_AT, 1450716_AT, 1449534_AT, 1457218_AT, 1431199_AT, 1452388_AT, 1422627_A_AT, 1438018_AT, 1416408_AT	648	409	13588	0.71777	1	0.999998	100
[truncated: 271 more rows]

## Sheet: 0610006L08RIK
Annotation Cluster 1	Enrichment Score: 33.13598722453412
Category	Term	Count	%	PValue	Genes	List Total	Pop Hits	Pop Total	Fold Enrichment	Bonferroni	Benjamini	FDR
UP_SEQ_FEATURE	disulfide bond	238	23.3792	1.85763e-41	1421288_AT, 1421652_AT, 1421517_AT, 1427387_A_AT, 1456508_AT, 1434098_AT, 1421687_AT, 1421134_AT, 1448768_AT, 1448881_AT, 1450562_AT, 1422214_AT, 1450317_AT, 1449396_AT, 1424592_A_AT, 1427784_AT, 1422582_AT, 1449976_A_AT, 1416913_AT, 1428056_AT, 1450604_AT, 1434195_AT, 1449191_AT, 1422515_AT, 1448813_AT, 1417246_AT, 1441752_AT, 1427747_A_AT, 1450601_AT, 1418918_AT, 1421195_AT, 1420465_S_AT, 14249…	674	2379	16021	2.378	3.16727e-38	3.16727e-38	3.13434e-38
SP_PIR_KEYWORDS	disulfide bond	243	23.8703	2.57685e-41	1421288_AT, 1421652_AT, 1421517_AT, 1427387_A_AT, 1456508_AT, 1434098_AT, 1421687_AT, 1421134_AT, 1448768_AT, 1448881_AT, 1450562_AT, 1422214_AT, 1450317_AT, 1449396_AT, 1424592_A_AT, 1427784_AT, 1422582_AT, 1449976_A_AT, 1416913_AT, 1428056_AT, 1450604_AT, 1434195_AT, 1449191_AT, 1422515_AT, 1448813_AT, 1417246_AT, 1441752_AT, 1427747_A_AT, 1450601_AT, 1418918_AT, 1421195_AT, 1420465_S_AT, 14249…	741	2469	17854	2.37139	1.10031e-38	1.10031e-38	3.62835e-38
GOTERM_CC_FAT	GO:0005576~extracellular region	195	19.1552	1.14822e-39	1448506_AT, 1420347_AT, 1424279_AT, 1425947_AT, 1421134_AT, 1421687_AT, 1452135_AT, 1448881_AT, 1450317_AT, 1424592_A_AT, 1427784_AT, 1422582_AT, 1416913_AT, 1434195_AT, 1449191_AT, 1418756_AT, 1422515_AT, 1417246_AT, 1421677_AT, 1427747_A_AT, 1418918_AT, 1420465_S_AT, 1424911_A_AT, 1452403_A_AT, 1425425_A_AT, 1420627_A_AT, 1424599_AT, 1450297_AT, 1449990_AT, 1416025_AT, 1421465_AT, 1451054_AT, 1…	560	1680	12504	2.59171	3.39874e-37	3.39874e-37	1.53123e-36
SP_PIR_KEYWORDS	Secreted	171	16.7976	1.43422e-38	1448506_AT, 1421564_AT, 1420347_AT, 1425947_AT, 1422916_AT, 1422815_AT, 1421687_AT, 1452135_AT, 1448881_AT, 1425152_S_AT, 1422448_AT, 1449320_AT, 1424592_A_AT, 1425218_A_AT, 1438617_AT, 1422582_AT, 1427784_AT, 1434195_AT, 1416523_AT, 1449191_AT, 1415777_AT, 1418756_AT, 1426547_AT, 1422515_AT, 1417246_AT, 1450763_X_AT, 1449830_AT, 1450788_AT, 1427747_A_AT, 1421677_AT, 1425260_AT, 1426154_S_AT, 141…	741	1420	17854	2.90152	6.12411e-36	3.06206e-36	2.01947e-35
SP_PIR_KEYWORDS	signal	253	24.8527	1.72138e-32	1448506_AT, 1421288_AT, 1421652_AT, 1420347_AT, 1420466_AT, 1427387_A_AT, 1425947_AT, 1456508_AT, 1434098_AT, 1451922_AT, 1448906_AT, 1421687_AT, 1421134_AT, 1452135_AT, 1448768_AT, 1450562_AT, 1448881_AT, 1424592_A_AT, 1427784_AT, 1422582_AT, 1416913_AT, 1434195_AT, 1449191_AT, 1418756_AT, 1422515_AT, 1417246_AT, 1441752_AT, 1427747_A_AT, 1418918_AT, 1450689_AT, 1420465_S_AT, 1417047_AT, 1424911…	741	2970	17854	2.05249	7.35028e-30	2.45009e-30	2.4238e-29
UP_SEQ_FEATURE	signal peptide	251	24.6562	1.10419e-31	1448506_AT, 1421288_AT, 1421652_AT, 1420347_AT, 1420466_AT, 1427387_A_AT, 1425947_AT, 1456508_AT, 1434098_AT, 1451922_AT, 1448906_AT, 1421687_AT, 1421134_AT, 1452135_AT, 1448768_AT, 1450562_AT, 1448881_AT, 1424592_A_AT, 1427784_AT, 1422582_AT, 1416913_AT, 1434195_AT, 1449191_AT, 1418756_AT, 1422515_AT, 1417246_AT, 1441752_AT, 1427747_A_AT, 1418918_AT, 1450689_AT, 1420465_S_AT, 1417047_AT, 1424911…	674	2963	16021	2.01359	1.88264e-28	9.41322e-29	1.86307e-28
SP_PIR_KEYWORDS	glycoprotein	264	25.9332	1.12884e-23	1448506_AT, 1421288_AT, 1421652_AT, 1420347_AT, 1421517_AT, 1427387_A_AT, 1425947_AT, 1425128_AT, 1456508_AT, 1434098_AT, 1451922_AT, 1448906_AT, 1449067_AT, 1421134_AT, 1448768_AT, 1450562_AT, 1448881_AT, 1422214_AT, 1450317_AT, 1449396_AT, 1424592_A_AT, 1449976_A_AT, 1416913_AT, 1428056_AT, 1425109_AT, 1450604_AT, 1434195_AT, 1427042_AT, 1450947_AT, 1448813_AT, 1417246_AT, 1441752_AT, 1427747_A…	741	3600	17854	1.76693	4.82016e-21	1.20504e-21	1.58948e-20
UP_SEQ_FEATURE	glycosylation site:N-linked (GlcNAc...)	252	24.7544	4.82901e-22	1448506_AT, 1421288_AT, 1421652_AT, 1420347_AT, 1421517_AT, 1427387_A_AT, 1425947_AT, 1425128_AT, 1456508_AT, 1434098_AT, 1451922_AT, 1448906_AT, 1449067_AT, 1421134_AT, 1448768_AT, 1448881_AT, 1422214_AT, 1450317_AT, 1449396_AT, 1424592_A_AT, 1449976_A_AT, 1416913_AT, 1428056_AT, 1425109_AT, 1450604_AT, 1434195_AT, 1427042_AT, 1450947_AT, 1448813_AT, 1417246_AT, 1427747_A_AT, 1433579_AT, 1450601…	674	3444	16021	1.73927	8.23347e-19	2.05837e-19	8.14787e-19
Annotation Cluster 2	Enrichment Score: 16.25111005556413
Category	Term	Count	%	PValue	Genes	List Total	Pop Hits	Pop Total	Fold Enrichment	Bonferroni	Benjamini	FDR
UP_SEQ_FEATURE	domain:Peptidase S1	38	3.73281	8.38213e-24	1449463_AT, 1449989_AT, 1419594_AT, 1420490_AT, 1422867_AT, 1422352_AT, 1448881_AT, 1418959_AT, 1420278_AT, 1419090_X_AT, 1458871_AT, 1421714_AT, 1415837_AT, 1421256_AT, 1421510_AT, 1425144_AT, 1418320_AT, 1451788_AT, 1416051_AT, 1451597_AT, 1434195_AT, 1455848_AT, 1450538_S_AT, 1417314_AT, 1419060_AT, 1449564_AT, 1419010_X_AT, 1417867_AT, 1420343_AT, 1419017_AT, 1420701_AT, 1448220_AT, 1450802_A…	674	111	16021	8.13749	1.42915e-20	4.76385e-21	1.4143e-20
[truncated: 1,985 more rows]

## Sheet:  0610010D20RIK
Annotation Cluster 1	Enrichment Score: 21.800642099858745
Category	Term	Count	%	PValue	Genes	List Total	Pop Hits	Pop Total	Fold Enrichment	Bonferroni	Benjamini	FDR
[truncated: 2,280 more rows]

## Sheet: 0610031J06RIK
Annotation Cluster 1	Enrichment Score: 18.59087114982864
Category	Term	Count	%	PValue	Genes	List Total	Pop Hits	Pop Total	Fold Enrichment	Bonferroni	Benjamini	FDR
[truncated: 2,632 more rows]

## Sheet: 0610037L13RIK
Annotation Cluster 1	Enrichment Score: 16.966822562641585
[truncated: 1,899 more rows]

## Sheet: 0610037M15RIK
Annotation Cluster 1	Enrichment Score: 24.022432665623665
[truncated: 2,503 more rows]

[truncated: 1 more sheets: 0710008K08RIK]
